# Supplementary material
Source: publisher figshare collection journal article supplement (https://gsajournals.figshare.com/ndownloader/files/24777104)
Supplement: Supplementary file 1 [file 24777104]

## Sheet: SNP data
NC=NoCall		Parents																																					Seedlings
	Probeset ID	11.139-10	11.31-36	11.31-54	11.58-72	11.77-96	11.83-20	11.98-41	12.115-10	12.121-5	12.5-103	12.55-220	12.70-55	12.74-39	12.75-77	12.82-44	12.90-53	12.93-4	13.19-86	13.22-336	13.22-499	13.23-2	13.26-134	13.27-142	13.42-113	13.42-5	13.4-53	13.51-134	13.55-195	13.65-160	Camarosa	Elyana	FL_06-38	FL_10-121	FL_10-89	FL_10-92	Florida127		16.05-13	16.05-14	16.05-19	16.05-20	16.05-32	16.05-41	16.05-44	16.05-64	16.05-67	16.05-7	16.05-8
1	AX-89817638	AA	AB	AA	AA	AA	AA	AA	AA	AB	AA	AA	AA	AB	AB	AB	AA	AA	AA	AA	AA	AA	AA	AB	AA	AA	AB	AA	AA	AA	AA	AB	AA	AA	AA	AA	AA		AA	AA	AA	AA	AA	AA	AA	AA	AA	AA	AA
2	AX-89847026	AA	AA	AA	AA	AA	AA	AB	AA	AA	AA	AB	BB	NC	AA	AA	AB	AA	AB	AB	AB	AA	AA	AA	AB	AA	AA	AB	AB	AA	AB	AB	AA	AB	AA	AA	AB		AB	AB	AB	AB	AB	AB	AB	AB	AB	AB	AB
3	AX-89873775	AA	AA	AA	AA	AA	AA	AA	AA	AB	AA	AA	AB	AB	AA	AA	AA	AA	AA	AB	AB	AB	AA	AB	AA	AA	AA	AA	AB	AA	AA	AB	AA	AA	AA	AA	AA		AB	AA	AB	AA	AB	AA	AA	AA	AB	AA	AA
4	AX-89875355	BB	AA	AA	AB	AA	AB	AA	AA	AA	BB	AA	AB	AB	AB	AA	AA	AA	AA	AA	AA	AB	AA	AB	AA	AA	AA	AA	AB	AA	AA	AB	AA	AA	AB	AA	AA		AB	AA	AB	AA	AB	AA	AA	AA	AB	AA	AA
5	AX-89818190	BB	AA	AA	AA	AA	BB	AA	AA	AA	AA	AA	AB	AB	AA	AA	AA	AA	AA	AA	AA	AB	AA	AB	AA	AA	AA	AA	AB	AA	AA	AB	AA	AA	AA	AA	AA		AB	AA	AB	AA	AB	AA	AA	AA	AB	AA	AA
6	AX-89779953	AA	AA	AA	AA	AA	AA	AA	AA	AB	AA	AA	AB	AB	AA	AA	AA	AA	BB	AB	AB	AB	AA	NC	AA	AB	AA	AA	AB	AA	AB	AB	AA	AA	AA	AA	AA		AB	AA	AB	AA	AB	AA	AA	AA	AB	AA	AA
7	AX-89779969	AB	BB	BB	BB	BB	BB	BB	BB	AB	BB	BB	AB	AB	BB	BB	BB	BB	BB	AB	AB	AB	BB	AB	BB	BB	BB	BB	AB	BB	BB	AB	BB	BB	BB	BB	BB		AB	BB	AB	BB	AB	BB	BB	BB	AB	BB	BB
8	AX-89818271	BB	AB	AA	BB	BB	AB	AB	AB	AB	BB	AA	AB	AB	AB	AB	AA	AA	BB	AB	AB	AB	AA	BB	AA	BB	AB	AA	AB	AB	BB	AB	AB	AA	BB	BB	AB		AB	AA	AB	AA	NC	AA	AB	AB	AB	NC	AA
9	AX-89847095	AB	AB	BB	AA	AA	AB	AB	AB	AB	AA	BB	AB	AB	AB	AB	BB	BB	AB	AB	AB	BB	BB	NC	BB	AB	AB	BB	BB	AB	AB	AB	AB	BB	BB	AB	AB		AB	BB	AB	BB	AB	BB	AB	AB	AB	BB	BB
10	AX-89780165	AA	AB	AA	AA	BB	AA	BB	AA	AB	AA	BB	BB	AB	AA	AB	AB	AB	BB	BB	BB	AB	AA	BB	AB	BB	AB	BB	BB	AB	BB	BB	AB	AB	AA	AA	BB		AB	AB	AB	AB	AB	AB	AB	AB	AB	AB	AB
11	AX-89818339	BB	AA	AA	AB	AA	AB	AA	AA	AB	BB	AA	AB	AB	AB	AA	AA	AA	AA	AB	AB	AA	AA	AB	AA	AA	AA	AA	AA	AA	AA	AB	AA	AA	AB	AA	AA		AB	AA	AB	AA	AB	AA	AA	AA	AB	AA	AA
12	AX-89818370	BB	AB	NC	BB	BB	BB	BB	AB	AB	BB	BB	BB	AB	BB	AB	AB	AB	BB	BB	BB	AA	AA	BB	AB	BB	AB	BB	BB	AB	BB	BB	AB	AB	BB	BB	BB		AB	AB	AB	AB	AB	AB	AB	AB	AB	AB	AB
13	AX-89818443	BB	BB	BB	BB	BB	BB	AB	BB	BB	BB	NC	AB	BB	BB	BB	AB	AB	AB	AB	AB	BB	BB	BB	AB	BB	BB	AB	AB	BB	AB	AB	BB	AB	AB	BB	AB		BB	AB	BB	AB	BB	AB	BB	BB	BB	AB	AB
14	AX-89778563	AB	AB	AB	AB	AB	AA	AB	AA	AB	AB	BB	BB	AB	AA	AB	AB	BB	BB	AB	AB	AB	AB	AA	AB	AA	AB	AB	AA	AB	AB	BB	AA	BB	AB	AB	BB		BB	AB	BB	AB	AB	AB	BB	BB	BB	AB	BB
15	AX-89779079	AA	AB	AB	AA	AB	AA	AB	AA	AB	AA	AA	AA	AB	NC	AB	AB	AA	AA	AB	AB	AB	AB	BB	AB	BB	AB	AB	BB	AB	AB	AA	BB	AA	AA	AA	AA		AA	AB	AA	AB	AB	AB	AA	AA	AA	AB	AA
16	AX-89904153	AB	AB	AB	AA	AB	AB	AB	AB	AB	AA	BB	BB	AB	AB	AB	AB	BB	BB	AB	AB	AB	AB	AA	AB	AA	AB	AB	AA	AB	AB	BB	AA	BB	AB	AA	BB		BB	AB	BB	AB	AB	AB	BB	BB	BB	AB	BB
17	AX-89846905	AA	AB	AB	AB	AB	AB	AB	BB	AB	AA	BB	BB	AB	AA	AB	AB	BB	BB	AB	AB	AB	AB	AA	AB	AA	AB	AB	AA	AB	AB	BB	AA	BB	BB	AB	BB		BB	AB	BB	AB	AB	AB	BB	BB	BB	AB	BB
18	AX-89816836	AA	AB	AB	AA	AB	AA	BB	AA	AB	AA	BB	BB	BB	AA	AB	AB	AB	AB	AB	AB	AB	AB	BB	AB	BB	AB	AB	BB	AB	AB	BB	BB	AB	AA	AA	AB		AB	BB	BB	BB	BB	BB	AB	AB	AB	BB	AB
19	AX-89816167	BB	AB	AB	BB	AB	BB	AB	BB	AB	BB	BB	BB	AB	BB	AB	AB	BB	BB	AB	AB	AB	AB	AA	AB	AA	AB	AB	AA	AB	AB	BB	AA	BB	BB	BB	BB		BB	AB	BB	AB	AB	AB	BB	BB	BB	AB	BB
20	AX-89816862	AA	AB	AB	AA	AB	AA	AB	AA	AB	AA	AA	AA	AB	AA	AB	AB	AA	AA	AB	AB	AB	AB	BB	AB	BB	AB	AB	BB	AB	AB	AA	BB	AA	AA	AA	AA		AA	AB	AA	AB	AB	AB	AA	AA	AA	AB	AA
21	AX-89846929	BB	AB	AB	BB	AB	AB	BB	AB	AB	BB	BB	BB	AA	BB	BB	AB	BB	AB	AB	AB	AB	AB	AA	AB	AA	AB	AB	AA	AB	AB	AB	AA	BB	AB	AB	BB		BB	AB	BB	AB	AB	AB	BB	BB	BB	AB	BB
22	AX-89846768	AA	AB	AB	AB	AB	AB	AA	AB	AB	AA	AA	AA	AB	AA	AA	AB	AA	AB	AB	AB	AB	AB	BB	AB	BB	AB	AB	BB	AB	AB	AB	BB	AA	AA	AA	AA		AA	AB	AA	AB	AB	AB	AA	AB	AA	AB	AA
23	AX-89904072	AB	AB	AB	AA	AB	AB	BB	AA	AB	AA	BB	BB	AB	AB	BB	AB	AB	AB	AB	AB	AB	AB	AA	AB	AA	AB	AB	AA	AB	AB	AB	AA	BB	AB	AA	BB		BB	BB	BB	AB	AB	AB	BB	AB	BB	AB	BB
24	AX-89778507	BB	AB	AB	BB	AB	BB	AA	BB	AB	BB	AA	AA	AB	BB	AA	AB	AB	AB	AB	AB	AB	AB	BB	AB	BB	AB	AB	BB	AB	AB	AB	BB	AA	BB	BB	AA		AA	AA	AA	AB	AB	AB	AA	AB	AA	AB	AA
25	AX-89780890	BB	AB	AB	BB	AB	BB	BB	BB	AB	BB	BB	BB	AB	BB	BB	AB	AB	AB	AB	AB	AB	AB	AA	AB	AA	AB	AB	AA	AB	AB	AB	AA	BB	BB	BB	BB		BB	BB	BB	AB	AB	AB	BB	AB	BB	AB	BB
26	AX-89815980	AB	AB	AB	BB	AB	BB	BB	BB	AB	AB	BB	BB	AB	AB	BB	AB	AB	AB	AB	AB	AB	AB	AA	AB	AA	AB	AB	AA	AB	AB	AB	AA	BB	BB	BB	BB		BB	BB	BB	AB	AB	AB	BB	AB	BB	AB	BB
27	AX-89904325	AB	AB	AB	AB	AB	AB	BB	AB	AB	BB	BB	BB	AB	AB	BB	AB	AB	AB	AB	AB	AB	AB	AA	AB	AA	AB	AB	AA	AB	AB	AB	AA	BB	AB	AB	BB		BB	BB	BB	AB	AB	AB	BB	AB	BB	AB	BB
28	AX-89904317	BB	AB	AB	AB	AB	BB	AA	AB	AB	AB	AA	AA	AB	BB	AA	AB	AB	AB	AB	AB	AB	AB	BB	AB	BB	AB	AB	BB	AB	AB	AB	BB	AA	BB	AB	AA		AA	AA	AA	AB	AB	AB	AA	AB	AA	AB	AA
29	AX-89806416	BB	AB	AB	AB	AB	BB	AA	AB	AB	AB	AA	AA	AB	BB	AA	AB	AB	AB	AA	AA	AB	AB	AB	AA	AB	AA	AA	AB	AB	AB	AB	AA	AA	BB	BB	AA		AA	AA	AA	AB	AB	AB	AA	AB	AA	AB	AA
30	AX-89816060	BB	AA	AA	BB	AA	BB	AA	AB	AA	BB	AA	AA	AA	BB	AA	AA	AA	AA	AA	AA	AA	AA	AA	AA	AA	AA	AA	AA	AA	NC	AA	AA	AA	BB	BB	AA		AA	AA	AA	AA	AA	AA	AA	AA	AA	AA	AA
31	AX-89846800	AA	AB	AB	AB	AB	AB	NC	AB	AB	AA	AA	AA	AB	AA	AA	AB	AB	AB	AB	AB	AB	AB	BB	AB	BB	AB	AB	BB	AB	AB	AB	BB	AA	BB	AB	AA		AA	AA	AA	AB	AB	AB	AA	AB	AA	AB	AA
32	AX-89806322	AA	AB	AB	AB	AB	AA	AA	AB	AB	AB	AA	AA	AB	AA	AA	AB	AB	AB	AB	AB	AB	AB	BB	AB	BB	AB	AB	BB	AB	AB	AB	BB	AA	AA	AA	AA		AA	AA	AA	AB	AB	AB	AA	AB	AA	AB	AA
33	AX-89847200	AB	AB	AB	AA	AB	BB	AA	AA	AB	AB	AA	AA	AB	BB	AA	AB	AB	AB	AA	AA	AB	AB	AB	AA	AB	AA	AA	AB	AB	AB	AB	AA	AA	BB	BB	AA		AA	AA	AA	AB	AB	AB	AA	AB	AA	AB	AA
34	AX-89816038	AA	AB	AB	AA	AB	AA	BB	AA	AB	AA	BB	BB	AB	AB	BB	AB	AB	AB	AB	AB	AB	AB	AA	AB	AA	AB	AB	AA	AB	AB	AB	AA	BB	AA	AA	BB		BB	BB	BB	AB	AB	AB	BB	AB	BB	AB	BB
35	AX-89856704	AB	AB	AB	AA	AB	AB	AA	AA	AB	AA	AA	AA	NC	AA	AA	AB	AB	AB	AB	AB	AB	AB	BB	AB	BB	AB	AB	BB	AB	AB	AB	BB	AA	AA	AB	AA		AA	AA	AA	AB	AB	AB	AA	AB	AA	AB	AA
36	AX-89816132	AA	AB	AB	AB	AB	BB	BB	AB	AB	AA	BB	BB	AB	AA	BB	AB	AB	AB	AB	AB	AB	AB	AA	AB	AA	AB	AB	AA	AB	AB	AB	AA	BB	AB	AB	BB		BB	BB	BB	AB	AB	AB	BB	AB	BB	AB	BB
37	AX-89778437	AA	BB	AB	AA	AB	AA	BB	AA	AB	AA	BB	BB	BB	AA	AB	AB	AB	BB	AB	AB	BB	AB	BB	BB	BB	AB	AB	BB	AB	AB	BB	BB	BB	AA	AA	AB		AB	AB	BB	BB	BB	BB	AB	BB	AB	BB	AB
38	AX-89846786	BB	AB	AB	AB	AB	AB	BB	AA	AB	BB	BB	BB	AB	BB	BB	AB	AB	AB	AB	AB	AB	AB	AA	AB	AA	AB	AB	AA	AB	AB	AB	AA	BB	AA	AB	BB		BB	BB	BB	AB	AB	AB	BB	AB	BB	AB	BB
39	AX-89815968	AA	AB	AB	AB	AB	BB	AA	BB	AB	AA	AA	AA	AB	AA	AA	AB	AB	AB	AA	AA	AB	AB	AB	AA	AB	AA	AA	AB	AB	AB	AB	AA	AA	AB	AB	AA		AA	AA	AA	AB	AB	AB	AA	AB	AA	AB	AA
40	AX-89847008	AA	AB	AB	AB	AB	AB	AA	BB	AB	BB	AA	AA	AA	AB	AA	AB	AB	AB	AB	AB	AB	AB	BB	AA	BB	AB	AB	BB	AB	AB	AB	BB	AA	AB	AA	AA		AA	AA	AA	AB	AB	AB	AA	AB	AA	AB	AA
41	AX-89778400	AA	AB	AB	AA	AB	AA	BB	AA	AB	AA	BB	BB	AB	AA	BB	AB	AB	AB	AB	AB	AB	AB	AA	AB	AA	AB	AB	AA	AB	AB	AB	NC	BB	AA	AA	BB		BB	BB	BB	AB	AB	AB	BB	AB	BB	AB	BB
42	AX-89873042	BB	AB	AB	AB	AB	BB	BB	AB	AB	AB	BB	BB	AB	BB	BB	AB	AB	AB	AB	AB	AB	AB	AA	AB	AA	AB	AB	AA	AB	AB	AB	NC	BB	BB	BB	BB		BB	BB	BB	AB	AB	AB	BB	AB	BB	AB	BB
43	AX-89874575	AB	AB	AB	AB	AB	AA	BB	AB	AB	AA	BB	BB	AB	BB	BB	AB	AB	AB	BB	BB	AB	AB	AB	BB	AB	BB	BB	AB	AB	AB	AB	BB	BB	AB	BB	BB		BB	BB	BB	AB	AB	AB	BB	AB	BB	AB	BB
44	AX-89819269	BB	AB	AB	BB	AB	BB	BB	BB	AB	BB	BB	BB	AB	BB	BB	AB	AB	AB	BB	BB	AB	AB	AB	BB	AB	BB	BB	AB	AB	AB	AB	BB	BB	BB	BB	BB		BB	BB	BB	AB	AB	AB	BB	AB	BB	AB	BB
45	AX-89873195	AA	AA	AA	AA	AA	AA	AA	AB	AA	AA	AA	AA	AA	AA	AA	AA	AA	AA	AA	AA	AA	AA	AA	AA	AA	AA	AA	AA	AA	NC	AA	AA	AA	AA	AA	AA		AA	AA	AA	AA	AA	AA	AA	AA	AA	AA	AA
46	AX-89815996	AB	BB	AB	AA	AB	AA	BB	AA	AB	AB	BB	BB	BB	AB	AB	AB	AB	BB	AB	AB	BB	AB	BB	BB	BB	AB	AB	BB	AB	AB	BB	BB	BB	AA	AA	AB		AB	AB	BB	BB	BB	BB	AB	BB	AB	BB	AB
47	AX-89815972	AB	AB	AB	AA	AB	AA	AA	AA	AB	AB	AA	AA	AB	AB	AA	AB	AB	AB	AB	AB	AB	AB	BB	AB	BB	AB	AB	BB	AB	AB	AB	BB	AA	AA	AA	AA		AA	AA	AA	AB	AB	AB	AA	AB	AA	AB	AA
48	AX-89778453	BB	AB	AB	BB	AB	BB	BB	BB	AB	BB	BB	BB	AB	BB	BB	AB	AB	AB	AB	AB	AB	AB	NC	AB	AA	AB	AB	AA	AB	AB	AB	AA	BB	BB	BB	BB		BB	BB	BB	NC	NC	AB	BB	AB	BB	AB	BB
49	AX-89847011	BB	AB	AB	AB	AB	AB	BB	AA	AB	AA	BB	BB	AB	AB	BB	AB	AB	AB	AB	AB	AB	AB	AA	AB	AA	AB	AB	AA	AB	AB	AB	AA	BB	AB	BB	BB		BB	BB	BB	AB	AB	AB	BB	AB	BB	AB	BB
50	AX-89872301	BB	AA	AB	AB	AB	BB	AA	AB	AB	AB	AA	AA	AA	BB	AB	AB	AB	AA	AB	AB	AA	AB	AA	AA	AA	AB	AB	AA	AB	AB	AA	AA	AA	BB	BB	AB		AB	AB	AA	AA	AA	AA	AB	AA	AB	AA	AB
51	AX-89847172	AB	AB	AB	AB	AB	AB	AA	AB	AB	AB	AA	AA	AB	AB	AA	AB	AB	AB	AB	AB	AB	AB	BB	AB	BB	AB	AB	BB	AB	AB	AB	BB	AA	BB	AB	AA		AA	AA	AA	AB	AB	AB	AA	AB	AA	AB	AA
52	AX-89819187	AB	AB	AB	BB	AB	BB	BB	AB	AB	AB	BB	BB	AB	AA	BB	AB	AB	AB	AB	AB	AB	AB	AA	AB	AA	AB	AB	AA	AB	AB	AB	AA	BB	BB	BB	BB		BB	BB	BB	AB	AB	AB	BB	AB	BB	AB	BB
53	AX-89816011	AA	BB	AB	AA	AB	AA	BB	AA	AB	AA	BB	BB	BB	AA	AB	AB	AB	BB	AB	AB	BB	AB	BB	BB	BB	AB	AB	BB	AB	AB	BB	BB	BB	AA	AA	AB		AB	AB	BB	BB	BB	BB	AB	BB	AB	BB	AB
54	AX-89815869	AA	AA	AB	AB	AB	BB	AA	BB	AB	AA	AA	AA	AA	AB	AB	AB	AB	AA	AB	AB	AA	AB	AA	AA	AA	AB	AB	AA	AB	AB	AA	AA	AA	AB	AB	AB		AB	AB	AA	AA	AA	AA	NC	AA	AB	AA	AB
55	AX-89778350	AA	AB	AB	AA	AB	AA	BB	AA	AB	AA	BB	BB	AB	AA	BB	AB	BB	AB	AB	AB	AB	AB	AA	AB	AA	AB	AB	AA	AB	AB	AB	AA	BB	AA	AA	BB		BB	BB	BB	AB	AB	AB	BB	AB	BB	AB	BB
56	AX-89846927	AA	AB	AB	AA	AB	AB	BB	AB	AB	AA	BB	BB	AB	AA	BB	AB	BB	AB	AB	AB	AB	AB	AA	AB	AA	AB	AB	AA	AB	AB	AB	AA	BB	AB	AB	BB		BB	AB	BB	AB	AB	AB	BB	BB	BB	AB	BB
57	AX-89846919	AA	AB	AB	AB	AB	AB	BB	BB	AB	AA	BB	BB	BB	AA	AB	AB	AB	BB	AB	NC	AB	AB	BB	AB	BB	NC	AB	BB	AB	NC	BB	BB	AB	BB	AB	AB		AB	BB	BB	BB	BB	BB	AB	AB	AB	BB	AB
58	AX-89816897	AB	AB	AB	BB	AB	BB	AB	BB	AB	AB	BB	BB	AB	AB	BB	AB	BB	AB	AB	AB	AB	AB	AA	AB	AA	AB	AB	AA	AB	AB	AB	AA	BB	AB	BB	BB		BB	AB	BB	AB	AB	AB	BB	BB	BB	AB	BB
59	AX-89778621	AA	AB	AB	AA	AB	AA	AB	NC	AB	AA	AA	AA	AB	AB	AA	AB	AA	AB	AB	AB	AB	AB	BB	AB	BB	AB	AB	BB	AB	AB	AA	BB	AA	AA	AA	AA		AA	AB	AA	AB	AB	AB	AA	AA	AA	AB	AA
60	AX-89816930	BB	AB	AB	BB	AB	BB	AB	BB	AB	BB	BB	BB	AB	BB	BB	AB	BB	AB	AB	AB	AB	AB	AA	AB	AA	AB	AB	AA	AB	AB	AB	AA	BB	BB	BB	BB		BB	AB	BB	AB	AB	AB	BB	BB	BB	AB	BB
61	AX-89904163	AB	AB	AB	BB	AB	AB	AB	AB	AB	NC	AA	AA	AB	AB	AA	AB	AA	AB	AB	AB	AB	AB	BB	AB	BB	AB	AB	BB	AB	AB	AB	BB	AA	AB	BB	AA		AA	AB	AA	AB	AB	AB	AA	AA	AA	AB	AA
62	AX-89873314	BB	AB	AB	BB	AB	AB	AB	BB	AB	BB	BB	BB	AB	BB	BB	AB	BB	AB	AB	AB	AB	AB	AA	AB	AA	AB	AB	AA	AB	AB	BB	AA	BB	BB	AB	BB		BB	AB	BB	NC	AB	NC	BB	BB	BB	AB	BB
63	AX-89778385	BB	AA	AB	BB	AB	BB	AA	BB	AB	BB	AA	AA	AA	BB	AB	AB	AB	AA	AB	AB	AA	AB	AA	AA	AA	AB	AB	AA	AB	AB	AA	AA	AA	BB	BB	AB		AB	AA	AA	AA	AA	AA	NC	AB	AB	AA	AB
64	AX-89873018	BB	BB	AB	AB	AB	AB	BB	AB	AB	AB	BB	BB	BB	BB	AB	AB	AB	BB	AB	AB	BB	AB	BB	BB	BB	AB	AB	BB	AB	AB	BB	BB	BB	AB	AA	AB		AB	BB	BB	BB	BB	BB	NC	AB	AB	BB	AB
65	AX-89846932	AA	AB	AB	AB	AB	AB	BB	AB	AB	AA	BB	BB	AB	AA	BB	AB	BB	AB	AB	AB	AB	AB	AA	AB	AA	AB	AB	AA	AB	AB	AB	AA	BB	BB	AB	BB		BB	AB	BB	AB	AB	AB	BB	BB	BB	AB	BB
66	AX-89816940	BB	AB	AB	BB	AB	BB	AB	BB	AB	BB	BB	BB	AB	BB	BB	AB	BB	AB	AB	AB	AB	AB	AA	AB	AA	AB	AB	AA	AB	AB	AB	AA	BB	BB	BB	BB		BB	AB	BB	AB	AB	AB	BB	BB	BB	AB	BB
67	AX-89779160	BB	AB	AB	AB	AB	AB	AB	BB	BB	BB	AA	AB	AB	AB	AA	BB	AA	BB	BB	BB	AB	AB	BB	BB	BB	BB	BB	BB	AB	BB	AB	BB	AA	BB	BB	AB		AA	AB	AA	AB	AB	AB	AA	AA	AA	AB	AA
68	AX-89816370	AA	AB	AB	AA	AB	BB	AB	AA	AB	AA	AA	AA	AB	AA	AA	AB	AB	AB	AB	AB	BB	AB	BB	AB	BB	NC	AB	BB	AB	AB	AB	AA	AB	AA	AB	AA		AA	AB	AA	AB	AB	AB	AA	AA	AA	AB	AA
69	AX-89846883	AB	AB	AB	AB	AB	AB	AB	BB	AB	AA	BB	BB	AB	AA	AB	AB	BB	BB	AB	AB	AB	AB	AA	AB	AA	AB	AB	AA	AB	AB	BB	AB	BB	BB	AB	BB		BB	AB	BB	AB	AB	AB	BB	BB	BB	AB	BB
70	AX-89873779	BB	AB	AB	BB	AB	BB	AB	AB	AB	BB	AA	AA	BB	AB	AB	AB	AA	AA	AB	AB	AB	AB	BB	BB	BB	AB	AB	BB	AB	AB	AA	AB	AA	BB	BB	AA		AA	AB	AA	AB	AB	AB	AA	AA	AA	AB	AA
71	AX-89816690	BB	AB	AB	BB	AB	BB	BB	BB	AB	BB	BB	BB	BB	BB	AB	AB	AB	BB	AB	AB	AB	AB	BB	AB	BB	AB	AB	BB	AB	AB	BB	AB	AB	BB	BB	AB		AB	BB	BB	BB	BB	BB	AB	AB	AB	BB	AB
72	AX-89778764	AA	AB	AB	AA	AB	AA	AB	AB	AB	AA	BB	BB	AB	AA	BB	AB	BB	BB	AB	AB	AB	AB	AA	AB	AA	BB	AB	AA	AB	AB	BB	BB	BB	AA	AA	BB		BB	AB	BB	AB	AB	AB	BB	BB	BB	BB	BB
73	AX-89873781	BB	AB	AB	BB	AB	BB	AB	AB	AB	BB	AA	AA	AB	AB	AB	AB	AA	AA	AB	AB	AB	AB	BB	AB	BB	AB	AB	BB	AB	AB	AA	AB	AA	BB	BB	AA		AA	AB	AA	AB	AB	AB	AA	AA	AA	AB	AA
74	AX-89778982	BB	AB	AB	BB	AB	BB	AA	AB	AB	BB	AA	AA	AA	BB	AB	AB	AB	AA	AB	AB	AB	AB	AA	AB	AA	AB	AB	AA	AB	AB	AA	AB	AB	BB	BB	AB		AB	AA	AA	AA	AA	AA	AB	AB	AB	AA	AB
75	AX-89873473	BB	AB	AB	AB	AB	BB	AB	AB	AB	AB	AA	AA	AB	BB	AA	AB	AA	AA	AB	AB	AB	AB	BB	AB	BB	AA	AB	BB	AB	AB	AA	AA	AA	BB	BB	AA		AA	AB	AA	AB	AB	AB	AA	AA	AA	AA	AA
76	AX-89873545	AA	AB	AB	AB	AB	AA	AB	AB	AB	AB	AA	AA	AB	AA	AA	AB	AA	AA	AB	AB	AB	AB	BB	AB	BB	AA	AB	BB	AB	AB	AA	AA	AA	AA	AA	AA		AA	AB	AA	AB	AB	AB	AA	AA	AA	AA	AA
77	AX-89816461	BB	AB	AB	BB	AB	AB	AB	BB	AB	BB	AA	AA	AB	AB	AA	AB	AB	NC	AB	AB	BB	AB	BB	AB	BB	NC	AB	BB	AB	AB	AB	AB	AB	BB	BB	AA		AA	AA	AA	AA	NC	NC	AA	AA	AA	AA	AA
78	AX-89904186	BB	AA	AA	AB	AB	BB	AB	AB	AA	NC	AA	AA	AB	BB	AA	AA	AA	AA	AB	AB	AA	AA	AB	AB	AB	AA	AB	AB	AA	AB	AA	AA	AA	BB	AB	AA		AA	AA	AA	AA	AA	AA	AA	AA	AA	AA	AA
79	AX-89874272	AB	AA	AA	BB	AB	AB	AB	BB	AA	BB	AA	AA	AB	BB	AA	AA	AA	AA	AB	AB	AA	AA	AB	AB	AB	AA	AB	AB	AA	AB	AA	AA	AA	BB	BB	AA		AA	AA	AA	AA	AA	AA	AA	AA	AA	AA	AA
80	AX-89904181	AB	AA	AA	AA	AB	AB	AB	AA	AA	AA	AA	AA	AB	AB	AA	AA	AA	AA	AB	AB	AA	AA	AB	AB	AB	AA	AB	AB	AA	AB	AA	AA	AA	AB	AA	AA		AA	AA	AA	AA	AA	AA	AA	AA	AA	AA	AA
81	AX-89779223	AB	AA	AA	BB	AA	AB	AA	BB	AA	AA	AA	AA	AB	AB	AA	AA	AA	AA	AA	AA	AA	AA	AA	AA	AA	AA	AA	AA	AA	NC	AA	AA	AA	AB	AB	AA		AA	AA	AA	AA	AA	AA	AA	AA	AA	AA	AA
82	AX-89846953	AB	BB	BB	BB	BB	AB	BB	BB	BB	AB	BB	BB	AB	BB	BB	BB	BB	BB	BB	BB	BB	BB	BB	BB	BB	BB	BB	BB	BB	NC	BB	BB	BB	AB	AB	BB		BB	BB	BB	BB	BB	BB	BB	BB	BB	BB	BB
83	AX-89817124	BB	AA	AA	AB	AA	NC	AA	AB	AA	BB	AA	AA	AA	AB	AA	AA	AB	AA	AA	AA	AB	AA	AA	AA	AA	AA	AA	AA	AA	NC	AA	AA	AB	BB	BB	AA		AA	AA	AA	AA	AA	AA	AA	AA	AA	AA	AA
84	AX-89806390	AB	AA	AA	AA	AA	AA	AA	AA	AA	AB	AA	AA	BB	AA	AA	AA	AA	AA	AA	AA	AA	AA	AA	NC	AA	AA	AA	AA	AA	NC	AA	AA	AA	AB	AB	AA		AA	AA	AA	AA	AA	AA	AA	AA	AA	AA	AA
85	AX-89778963	BB	BB	BB	AB	BB	AB	BB	AB	BB	BB	BB	BB	BB	AA	BB	BB	BB	BB	BB	BB	AB	BB	BB	BB	BB	BB	BB	BB	BB	NC	BB	BB	AB	AA	AA	BB		BB	BB	BB	BB	BB	BB	BB	BB	BB	BB	BB
86	AX-89803108	BB	BB	BB	BB	BB	BB	BB	AB	BB	BB	BB	BB	BB	BB	BB	BB	BB	BB	BB	BB	AB	BB	BB	BB	BB	BB	BB	BB	BB	NC	BB	BB	AB	BB	BB	BB		BB	BB	BB	BB	BB	BB	BB	BB	BB	BB	BB
87	AX-89778898	BB	BB	BB	BB	BB	BB	AB	BB	BB	BB	BB	BB	BB	BB	BB	BB	BB	BB	BB	BB	AB	BB	BB	BB	BB	BB	BB	BB	BB	NC	BB	BB	AB	BB	BB	BB		BB	BB	BB	BB	BB	BB	BB	BB	BB	BB	BB
88	AX-89816532	AA	BB	BB	AA	BB	AA	BB	AB	BB	AA	BB	BB	BB	AB	BB	BB	BB	BB	BB	BB	AB	BB	BB	BB	BB	BB	BB	BB	BB	NC	BB	BB	AB	AA	AA	BB		BB	BB	BB	BB	BB	BB	BB	BB	BB	BB	BB
89	AX-89910600	AB	AA	AB	AA	AA	BB	BB	AA	AB	AA	AB	AA	BB	AB	AA	AA	BB	AA	AA	AA	AA	AB	AB	AA	AA	AA	AB	AA	AB	NC	BB	AA	AA	AB	AA	AB		NC	NC	NC	NC	AB	NC	NC	AB	AB	NC	NC
90	AX-89875638	BB	AA	BB	BB	AB	BB	AB	AB	AB	BB	BB	AB	AA	BB	AB	AA	AB	AA	AA	AA	AA	AB	AB	AA	AA	AA	AA	AA	BB	AB	AB	AA	AA	BB	BB	AA		BB	AB	AB	BB	BB	BB	AB	AB	BB	AB	BB
91	AX-89818534	AB	BB	BB	BB	BB	AB	BB	BB	BB	AA	BB	BB	BB	AB	BB	BB	BB	BB	BB	BB	BB	BB	BB	BB	BB	BB	BB	BB	BB	NC	BB	BB	BB	AB	AB	BB		BB	BB	BB	BB	BB	BB	BB	BB	BB	BB	BB
92	AX-89780362	AB	BB	BB	AA	BB	AA	BB	AA	BB	AB	BB	BB	BB	AA	BB	BB	BB	BB	BB	BB	BB	BB	BB	BB	BB	BB	BB	BB	BB	NC	BB	BB	BB	AB	BB	BB		BB	BB	BB	BB	BB	BB	BB	BB	BB	BB	BB
93	AX-89818407	BB	BB	BB	BB	BB	BB	BB	AB	BB	BB	BB	BB	BB	BB	BB	BB	BB	BB	BB	BB	BB	BB	BB	BB	BB	BB	BB	BB	BB	BB	BB	BB	BB	BB	BB	BB		BB	BB	BB	BB	BB	BB	BB	BB	BB	BB	BB
94	AX-89818313	AB	AA	AA	BB	AA	AB	AA	BB	AA	AA	AA	AA	AA	AB	AA	AA	AA	AA	AA	AA	AA	AA	AA	AA	AA	AA	AA	AA	AA	NC	AA	AA	AA	AB	AB	AA		AA	AA	AA	AA	AA	AA	AA	AA	AA	AA	AA
95	AX-89806497	AB	AA	AA	AB	AA	AA	AA	AB	AA	AB	AA	AA	AA	AA	AA	AA	AA	AA	AA	AA	AA	AA	AA	AA	AA	AA	AA	AA	AA	NC	AA	AA	AA	AB	BB	AA		AA	AA	AA	AA	AA	AA	AA	AA	AA	AA	AA
96	AX-89779945	BB	BB	BB	AB	AB	BB	BB	AB	BB	BB	BB	BB	AB	NC	BB	BB	BB	AA	BB	BB	BB	BB	BB	BB	BB	BB	BB	BB	BB	BB	BB	AB	BB	AB	AB	BB		BB	BB	BB	BB	BB	BB	BB	BB	BB	BB	BB
97	AX-89875249	BB	BB	BB	BB	AB	BB	BB	BB	BB	BB	BB	BB	AB	BB	BB	BB	BB	AA	BB	BB	BB	BB	BB	BB	BB	BB	BB	BB	BB	BB	BB	AB	BB	BB	BB	BB		BB	BB	BB	BB	BB	BB	BB	BB	BB	BB	BB
98	AX-89875399	AB	AA	AA	AA	AA	AB	AA	AB	AA	AA	AA	AA	AA	AB	AA	AA	AA	AA	AA	AA	AA	AA	AA	AA	AA	AA	AA	AA	AA	NC	AA	AA	AA	AB	BB	AA		AA	AA	AA	AA	AA	AA	AA	AA	AA	AA	AA
99	AX-89818101	BB	AA	AA	BB	AB	BB	AA	AB	AA	BB	AA	AA	AB	BB	AA	AA	AA	BB	AA	AA	AA	AA	AA	AA	AA	AA	AA	AA	AA	AA	AA	AB	AA	BB	BB	AA		AA	AA	AA	AA	AA	AA	AA	AA	AA	AA	AA
100	AX-89779985	AB	BB	BB	BB	BB	AB	BB	BB	BB	AB	BB	BB	BB	AB	BB	BB	BB	BB	BB	BB	BB	BB	BB	BB	BB	BB	BB	BB	BB	NC	BB	BB	BB	AB	AB	BB		BB	BB	BB	BB	BB	BB	BB	BB	BB	BB	BB
101	AX-89875083	AA	AB	AB	AB	AB	AA	AB	AB	AB	AA	AA	AA	AA	AB	AB	AB	AB	AA	AB	AB	BB	AA	AB	AA	AA	AA	AA	AA	AA	BB	AA	NC	AB	AA	AA	AA		AB	AB	AA	AA	AA	AB	AA	AB	AA	AA	AB
102	AX-89780119	BB	BB	AB	AB	AB	BB	AB	AA	AB	AB	BB	BB	AB	BB	AB	AB	AB	BB	AB	AB	AA	BB	AB	BB	BB	AB	BB	BB	BB	AA	BB	NC	AB	BB	BB	BB		AB	AB	BB	BB	BB	AB	BB	AB	BB	BB	AB
103	AX-89779051	BB	BB	AB	BB	AA	BB	AB	AB	AB	BB	BB	AB	AA	BB	AA	AB	AB	AA	AB	AB	AA	BB	AB	BB	AB	AA	BB	AB	BB	AA	AB	AA	AA	BB	BB	BB		AB	AA	AB	BB	BB	AA	AB	AB	AB	AB	AA
104	AX-89847854	BB	AB	AB	AB	AA	BB	AB	AB	AB	BB	BB	AB	NC	BB	AA	AB	AB	AA	AB	AB	AA	BB	AB	AB	AB	AA	BB	AB	NC	AA	AB	AA	AA	BB	BB	BB		AB	AA	AB	BB	BB	AA	AB	AB	AB	AB	AA
105	AX-89817680	BB	AA	AB	BB	AB	BB	AB	BB	AB	BB	AA	AB	AB	BB	NC	AB	AB	AA	AA	AA	AA	AA	AB	AA	AB	AB	AA	AB	AA	BB	AB	AB	AB	BB	BB	AA		AB	BB	AA	AA	AA	BB	AB	AB	AB	AB	AB
106	AX-89818628	AA	BB	AB	AA	AB	AA	AB	AA	AB	AA	BB	AB	NC	AA	AA	AB	AB	BB	BB	BB	BB	BB	AB	BB	AB	AA	BB	AB	BB	AA	AB	AB	AB	AA	AA	BB		AB	AA	BB	BB	BB	AA	AB	AB	AB	AB	AB
107	AX-89874754	BB	AB	AB	AB	BB	BB	AB	BB	AB	BB	AB	BB	BB	AB	BB	AB	AB	BB	AB	AB	BB	NC	BB	BB	AB	BB	AB	AB	AA	BB	AB	BB	BB	AB	AB	AB		BB	BB	BB	AB	AB	BB	AB	AB	AB	AB	AB
108	AX-89875289	BB	AB	AB	BB	AA	AB	AB	AB	AB	BB	AB	AA	AA	BB	AA	AB	AB	AA	AB	AB	AA	BB	AA	AA	AB	AA	AB	AB	BB	AA	AB	AA	AA	AB	AA	AB		AA	AA	AA	AB	AB	AA	AB	AB	AB	AB	AB
109	AX-89817763	AB	AB	AB	BB	AB	BB	BB	AB	AB	AB	AB	BB	BB	AA	BB	AB	BB	BB	AB	AB	BB	AB	BB	NC	AB	NC	AB	AB	AB	BB	BB	NC	BB	BB	BB	AB		BB	BB	BB	AB	AB	BB	AB	AB	AB	AB	AB
110	AX-89779715	BB	AA	AB	BB	AB	BB	AA	BB	AB	BB	AA	AB	AB	BB	BB	AB	AA	AA	AA	AA	AA	AA	AB	AA	AB	BB	AA	AB	AA	BB	AA	AB	AB	BB	BB	AA		AB	BB	AA	AA	AA	NC	AB	AB	AB	AB	AB
111	AX-89779710	AB	BB	AB	AB	AB	AB	NC	AB	AB	BB	BB	AB	AB	AA	AA	AB	AB	BB	BB	BB	BB	BB	AB	BB	AB	AA	BB	AB	BB	AA	AB	AB	AB	AB	AB	BB		AB	AA	BB	BB	BB	AA	AB	AB	AB	AB	AB
112	AX-89779648	AA	AB	AB	AA	AB	AA	AB	AA	AB	AA	BB	AB	AB	NC	AA	AB	AB	BB	AB	AB	AA	NC	AB	NC	AB	AA	BB	AB	BB	AA	AB	AB	AA	AA	AA	BB		AB	AA	BB	BB	BB	AA	AB	AB	AB	AB	AB
113	AX-89779599	BB	AB	AA	BB	AA	BB	AA	AB	AA	BB	AA	AA	AA	BB	AA	AA	AA	AA	AA	AA	AA	AA	AA	AB	AA	AA	AA	AA	AA	NC	AA	AA	AA	BB	BB	AA		AA	AA	AA	AA	AA	AA	AA	AA	AA	AA	AA
114	AX-89779594	BB	AB	AB	BB	AB	BB	AB	BB	AB	BB	AA	AB	AB	NC	BB	AB	AB	AA	AB	AB	BB	AA	AB	AB	AB	BB	AB	AB	AA	BB	AB	AB	BB	BB	BB	AA		AB	BB	AA	AA	AA	BB	AB	AB	AB	AB	AB
115	AX-89817549	BB	BB	BB	BB	BB	BB	BB	AB	BB	BB	BB	BB	BB	BB	BB	BB	BB	BB	BB	BB	BB	BB	BB	BB	BB	BB	BB	BB	BB	NC	BB	BB	BB	BB	BB	BB		BB	BB	BB	BB	BB	BB	BB	BB	BB	BB	BB
116	AX-89817616	BB	AB	AB	BB	BB	BB	AB	BB	AB	BB	AA	AB	BB	AB	BB	AB	AB	BB	AB	AB	BB	AA	AB	AB	AB	BB	AA	AB	AA	BB	AB	BB	BB	BB	BB	AA		AB	BB	AB	AA	AA	BB	AB	AB	AB	AB	AB
117	AX-89812597	BB	AB	AB	BB	AB	BB	AB	AB	AB	BB	BB	AB	AB	AA	AA	AB	AB	BB	BB	BB	BB	BB	AB	AB	AB	AA	BB	AB	BB	AA	AB	AB	AB	AB	AB	BB		AB	AA	BB	BB	BB	AA	AB	AB	AB	AB	AA
118	AX-89812277	AA	BB	AB	AA	AB	AA	AB	AA	AB	AA	BB	AB	AB	AA	NC	AB	AB	BB	BB	BB	BB	BB	AB	BB	AB	AA	BB	AB	BB	AA	AB	AB	AB	AA	AA	BB		AB	AA	BB	BB	BB	AA	AB	AB	AB	AB	AA
119	AX-89817193	AB	AA	AA	AB	AA	AB	AA	BB	AA	BB	AA	AA	AA	AB	AA	AA	AA	AA	AA	AA	AA	AA	AA	AA	AA	AA	AA	AA	AA	NC	AA	AA	AA	AB	AB	AA		AA	AA	AA	AA	AA	AA	AA	AA	AA	AA	AA
120	AX-89846863	AA	BB	BB	AB	BB	AB	AB	AB	BB	AA	BB	BB	AB	AA	BB	BB	BB	BB	AB	AB	AA	BB	AB	BB	BB	BB	BB	BB	BB	BB	BB	BB	AB	BB	AB	BB		BB	BB	BB	BB	BB	BB	BB	BB	BB	BB	BB
121	AX-89875513	AA	AA	AA	AB	AA	AB	AA	AB	AA	AB	AA	AA	AA	BB	AA	AA	AA	AA	AA	AA	AA	AA	AA	AA	AA	AA	AA	AA	AA	NC	AA	AA	AA	AA	NC	AA		AA	AA	AA	AA	AA	AA	AA	AA	AA	AA	AA
122	AX-89875598	AA	AA	AA	AA	AA	AA	AA	AA	AA	AA	AA	AA	AA	BB	AA	AA	AA	AA	AA	AA	AA	AA	AA	AA	AA	AA	AA	AA	AA	NC	AA	AA	AA	AA	BB	AA		AA	AA	AA	AA	AA	AA	AA	AA	AA	AA	AA
123	AX-89780478	AB	AA	AA	BB	AA	BB	AB	AB	AA	AB	AA	AA	AA	AB	AA	AB	AB	AA	AA	AA	AA	AA	AA	AA	AA	AA	AA	AA	AA	NC	AB	AA	AB	AB	AA	AA		AA	AA	NC	AA	AA	AA	AA	AA	AA	AA	AA
124	AX-89818644	AB	BB	BB	AA	BB	AA	BB	AA	BB	AA	BB	BB	BB	AB	BB	BB	BB	BB	BB	BB	BB	BB	BB	BB	BB	BB	BB	BB	BB	NC	BB	BB	BB	AB	BB	BB		BB	BB	BB	BB	BB	BB	BB	BB	BB	BB	BB
125	AX-89780488	AB	BB	BB	AB	BB	AA	BB	BB	BB	BB	BB	BB	BB	AA	BB	BB	BB	BB	BB	BB	BB	BB	BB	BB	BB	BB	BB	BB	BB	NC	BB	BB	BB	AB	BB	BB		BB	BB	BB	BB	BB	BB	BB	BB	BB	BB	BB
126	AX-89780608	AB	BB	BB	AA	BB	AA	BB	AA	BB	AA	BB	BB	BB	AB	BB	BB	BB	BB	BB	BB	BB	BB	BB	BB	BB	BB	BB	BB	BB	NC	BB	BB	BB	AB	AB	BB		BB	BB	BB	BB	BB	BB	BB	BB	BB	BB	BB
127	AX-89780557	BB	BB	BB	AB	BB	AB	BB	AA	BB	AB	BB	BB	BB	BB	BB	BB	BB	BB	BB	BB	BB	BB	BB	BB	BB	BB	BB	BB	BB	NC	BB	BB	BB	BB	BB	BB		BB	BB	BB	BB	BB	BB	BB	BB	BB	BB	BB
128	AX-89818863	AA	BB	BB	AB	BB	AB	BB	AA	BB	AB	BB	BB	BB	AB	BB	BB	BB	BB	BB	BB	BB	BB	BB	BB	BB	BB	BB	BB	BB	NC	BB	BB	BB	NC	AA	BB		BB	BB	BB	BB	BB	BB	BB	BB	BB	BB	BB
129	AX-89847162	BB	AA	AA	BB	AA	BB	AA	AB	AA	BB	AA	AA	AA	BB	AA	AA	AA	AA	AA	AA	AA	AA	AA	AA	AA	AA	AA	AA	AA	NC	AA	AA	AA	BB	BB	AA		AA	AA	AA	AA	AA	AA	AA	AA	AA	AA	AA
130	AX-89780734	AB	AA	AA	BB	AA	BB	AA	BB	AA	AB	AA	AA	AA	AA	AA	AA	AA	AA	AA	AA	AA	AA	AA	AA	AA	AA	AA	AA	AA	NC	AA	AA	AA	AB	BB	AA		AA	AA	AA	AA	AA	AA	AA	AA	AA	AA	AA
131	AX-89818985	BB	AA	AA	AB	AA	AA	AA	AA	AA	AA	AA	AA	AA	AA	AA	AA	AA	AA	AA	AA	AA	AA	AA	AA	AA	AA	AA	AA	AA	NC	AA	AA	AA	AA	AA	AA		AA	AA	AA	AA	AA	AA	AA	AA	AA	AA	AA
132	AX-89819083	AA	AA	AA	AB	AA	NC	AA	AB	AA	AB	AA	AA	AA	AA	AA	AA	AA	AA	AA	AA	AA	AA	AA	AA	AA	AA	AA	AA	AA	NC	AA	AA	AA	AA	AA	AA		AA	AA	AA	AA	AA	AA	AA	AA	AA	AA	AA
133	AX-89818982	AB	BB	BB	BB	BB	AB	BB	BB	BB	BB	BB	BB	AA	AA	BB	BB	BB	BB	BB	BB	BB	BB	BB	BB	BB	BB	BB	BB	BB	NC	BB	BB	BB	BB	AB	BB		BB	BB	BB	BB	BB	BB	BB	BB	BB	BB	BB
134	AX-89816562	BB	AB	AB	BB	AA	BB	NC	BB	AB	BB	AA	AA	AA	AB	AA	AA	AA	AA	NC	AA	AB	AA	NC	AA	AB	AB	AB	AB	AA	AA	AA	AA	AA	BB	BB	AB		AA	AA	AA	AA	AA	AB	AA	AA	AA	AB	AB
135	AX-89803100	BB	BB	AA	BB	AA	BB	NC	BB	BB	BB	AA	AB	AA	BB	AA	AB	AB	AB	AB	AB	BB	AB	AB	AB	BB	NC	AB	BB	AA	AB	AB	AB	AA	BB	BB	AB		AA	AA	AA	AA	AA	AB	AA	AA	AA	AB	AB
136	AX-89778942	NC	BB	BB	AA	BB	AA	BB	AA	BB	AA	BB	BB	BB	NC	BB	BB	BB	BB	BB	BB	BB	BB	BB	BB	BB	BB	BB	BB	BB	NC	BB	BB	BB	AA	AB	BB		BB	BB	BB	BB	BB	BB	BB	BB	BB	BB	BB
137	AX-89816632	AA	BB	BB	AB	BB	AA	BB	AB	BB	AB	BB	BB	BB	AB	BB	BB	BB	BB	BB	BB	BB	BB	BB	BB	BB	BB	BB	BB	BB	NC	BB	BB	BB	AA	AA	BB		BB	BB	BB	BB	BB	BB	BB	BB	BB	BB	BB
138	AX-89778980	AB	AB	AB	BB	BB	AB	AB	AB	BB	AB	BB	BB	BB	NC	BB	BB	BB	BB	BB	BB	AB	BB	BB	BB	AB	AB	BB	AB	BB	BB	BB	BB	BB	NC	AB	BB		BB	BB	BB	BB	BB	AB	BB	BB	BB	AB	AB
139	AX-89779111	BB	AB	AB	BB	BB	BB	BB	BB	BB	BB	BB	BB	BB	NC	BB	BB	BB	BB	BB	BB	AB	BB	BB	BB	AB	AB	BB	AB	BB	BB	BB	BB	BB	BB	BB	BB		BB	BB	BB	BB	BB	AB	BB	BB	BB	AB	AB
140	AX-89806368	AB	AA	AA	AB	AA	NC	AA	BB	AA	AB	AA	AA	AA	AA	AA	AA	AA	AA	AA	AA	AA	AA	AA	AA	AA	AA	AA	AA	AA	NC	AA	AA	AA	AB	AB	AA		AA	AA	AA	AA	AA	AA	AA	AA	AA	AA	AA
141	AX-89779245	AA	BB	BB	AB	BB	AA	BB	AB	BB	AA	BB	BB	BB	AA	BB	BB	BB	BB	BB	BB	BB	BB	BB	BB	BB	BB	BB	BB	BB	NC	BB	BB	BB	AA	AA	BB		BB	BB	BB	BB	BB	BB	BB	BB	BB	BB	BB
142	AX-89846971	AA	AA	AB	AA	BB	AB	NC	AA	BB	AA	BB	BB	BB	AA	BB	BB	BB	BB	BB	BB	AA	AB	BB	BB	AB	AB	BB	AB	BB	BB	BB	BB	BB	AA	AB	BB		BB	BB	BB	BB	BB	AB	BB	BB	BB	AB	AB
143	AX-89817175	BB	AB	AB	BB	AA	BB	AB	BB	AA	BB	AA	AA	AA	AB	AA	AA	AA	AA	AA	AA	AB	AA	AA	AA	AB	AB	AA	AB	AA	AA	AA	AA	AA	BB	BB	AA		AA	AA	AA	AA	AA	AB	AA	AA	AA	AA	AB
144	AX-89779298	AA	BB	BB	AB	BB	AA	BB	AB	BB	AB	BB	BB	BB	AB	BB	BB	BB	BB	BB	BB	BB	BB	BB	BB	BB	BB	BB	BB	BB	NC	BB	BB	BB	AA	AA	BB		BB	BB	BB	BB	BB	BB	BB	BB	BB	BB	BB
145	AX-89873797	AA	BB	BB	AA	BB	AA	BB	AB	BB	AA	BB	BB	BB	AA	BB	BB	BB	BB	BB	BB	BB	BB	BB	BB	BB	BB	BB	BB	BB	NC	AB	BB	BB	AA	AA	BB		BB	BB	BB	BB	BB	BB	BB	BB	BB	BB	BB
146	AX-89779032	AA	NC	AA	AA	AA	BB	AA	AA	AA	AB	AA	AA	AA	BB	AA	AA	AA	AA	AA	AA	AA	AA	AA	AA	AA	AA	AA	AA	AA	NC	AA	AA	AA	AB	AB	AA		AA	AA	AA	AA	AA	AA	AA	AA	AA	AA	AA
147	AX-89816194	AA	AB	AB	AA	AA	AA	BB	AA	AB	AA	AB	AA	AA	AA	AA	AA	AA	AA	AB	AB	AB	AA	AA	AA	AB	AB	AA	AB	AB	AB	AB	AA	AA	AA	AA	AB		AA	AA	AA	AA	AA	AB	AA	AB	AA	AB	AB
148	AX-89867447	AB	AB	AB	BB	AA	BB	NC	BB	AB	BB	AB	AA	AA	BB	AA	AA	AA	AA	AB	AB	AB	AA	AA	AA	AB	AB	AA	AB	AB	AA	AA	AA	AB	BB	BB	AB		AA	AA	AA	AA	AA	AB	AA	AB	AA	AB	AB
149	AX-89815243	AA	AB	AB	AA	BB	AA	AA	AA	AB	AA	AB	BB	BB	AA	BB	BB	BB	BB	AB	AB	AB	BB	BB	BB	AB	AB	BB	AB	AB	BB	AB	BB	AB	AA	AA	AB		BB	BB	BB	BB	BB	AB	BB	BB	BB	AB	AB
150	AX-89778394	AA	AB	AB	AB	AB	AB	BB	AB	AB	AB	AB	AA	AA	BB	AA	AA	AB	AA	AB	AB	AB	AA	AA	AA	AA	AB	AA	AB	AB	AA	BB	AA	AB	AA	AB	AB		AA	AA	AA	AA	AA	AB	AA	AA	AA	AB	AB
151	AX-89778366	BB	AB	AB	AB	AA	AB	BB	AB	AB	AB	AB	AA	NC	AA	AA	AA	AA	AA	AB	AB	AB	AA	AA	AA	AB	NC	AA	AB	AB	AA	AB	AA	AB	AB	AA	AB		AA	AA	AA	AA	AA	AB	AA	AA	AA	AB	AB
152	AX-89778532	BB	AA	AA	BB	AA	BB	AA	BB	AA	BB	AA	AA	AA	BB	AA	AA	AA	AA	AA	AA	AA	AA	AA	AA	AA	AA	AA	AA	AA	NC	AA	AA	AA	AB	AB	AA		AA	AA	AA	AA	AA	AA	AA	AA	AA	AA	AA
153	AX-89779486	AA	AA	AA	AA	AA	AA	AA	AB	AA	AA	AA	AA	AA	AA	AA	AA	AA	AA	AA	AA	AA	AA	AA	AA	AA	AA	AA	AA	AA	NC	AA	AA	AA	AA	AA	AA		AA	AA	AA	AA	AA	AA	AA	AA	AA	AA	AA
154	AX-89819276	AA	AB	AB	AA	BB	AA	NC	AB	AB	AA	AB	BB	AB	AA	BB	BB	AB	BB	AB	AB	AB	AB	BB	BB	AB	AB	AB	AB	AB	BB	AB	BB	AB	AA	AA	AA		BB	BB	BB	BB	BB	AB	BB	AB	BB	NC	AB
155	AX-89780853	AA	AA	AA	AA	AA	AB	AA	AA	AA	AB	AA	AA	AA	AA	AA	AA	AA	AA	AA	AA	AA	AA	AA	AA	AA	AA	AA	AA	AA	NC	AA	AA	AA	AA	AA	AA		AA	AA	AA	AA	AA	AA	AA	AA	AA	AA	AA
156	AX-89815995	AB	BB	BB	AA	BB	AB	BB	AA	BB	AA	BB	BB	BB	BB	BB	BB	BB	BB	BB	BB	BB	BB	BB	BB	BB	BB	BB	BB	BB	NC	BB	BB	BB	AA	AB	BB		BB	BB	BB	BB	BB	BB	BB	BB	BB	BB	BB
157	AX-89780868	AB	AA	AA	AA	AA	AA	AA	AB	AA	AA	AA	AA	AA	AA	AA	AA	AA	AA	AA	AA	AA	AA	AA	AA	AA	AA	AA	AA	AA	NC	AA	AA	AA	AA	BB	AA		AA	AA	AA	AA	AA	AA	AA	AA	AA	AA	AA
158	AX-89817418	BB	AB	AB	BB	AA	BB	BB	BB	AB	BB	AB	AA	AB	BB	AA	AA	AB	AA	AB	AB	AB	AB	AA	AA	AB	AB	AB	AB	AB	AA	AB	AA	AB	BB	BB	AB		AA	AA	AA	AA	AA	AB	AB	AB	AA	AB	AB
159	AX-89778417	BB	AA	AA	BB	AA	BB	AA	AB	AA	BB	AA	AA	AA	BB	AA	AA	AA	AA	AA	AA	AA	AA	AA	AA	AA	AA	AA	AA	AA	NC	AA	AA	AA	BB	AB	AA		AA	AA	AA	AA	AA	AA	AA	AA	AA	AA	AA
160	AX-89778455	AB	AA	AA	AB	AA	AB	AA	BB	AA	AB	AA	AA	AA	AB	AA	AA	AA	AA	AA	AA	AA	AA	AA	AA	AA	AA	AA	AA	AA	NC	AA	AA	AA	AB	AB	AA		AA	AA	AA	AA	AA	AA	AA	AA	AA	AA	AA
161	AX-89780871	AB	AA	AA	BB	AA	BB	AA	AB	AA	BB	AA	AA	AA	BB	AA	AA	AA	AA	AA	AA	AA	AA	AA	AA	AA	AA	AA	AA	AA	NC	AA	AA	AA	BB	AA	AA		AA	AA	AA	AA	AA	AA	AA	AA	AA	AA	AA
162	AX-89873136	AA	AB	AB	AA	BB	AA	AA	AA	AB	AA	AB	BB	AB	AA	BB	BB	AA	BB	AB	AB	AB	AB	BB	BB	AB	AB	AB	AB	AB	BB	AB	BB	AB	AA	AA	AA		BB	BB	BB	BB	BB	AB	AB	AB	BB	AB	AB
163	AX-89816002	BB	AA	AA	BB	AA	BB	AA	BB	AA	BB	AA	AA	AA	AB	AA	AA	AA	AA	AA	AA	AA	AA	AA	AA	AA	AA	AA	AA	AA	NC	AA	AA	AA	AB	AB	AA		AA	AA	AA	AA	AA	AA	AA	AA	AA	AA	AA
164	AX-89873075	AA	BB	BB	AA	BB	AA	BB	AB	BB	AA	BB	BB	BB	AA	BB	BB	BB	BB	BB	BB	BB	BB	BB	BB	BB	BB	BB	BB	BB	NC	BB	BB	BB	AA	AA	BB		BB	BB	BB	BB	BB	BB	BB	BB	BB	BB	BB
165	AX-89860456	AB	BB	BB	BB	BB	BB	BB	BB	BB	BB	BB	BB	AA	BB	BB	BB	BB	BB	BB	BB	BB	BB	BB	BB	BB	BB	BB	BB	BB	NC	BB	BB	BB	BB	AB	BB		BB	BB	BB	BB	BB	BB	BB	BB	BB	BB	BB
166	AX-89778344	AB	AA	AA	BB	AA	BB	AA	BB	AA	BB	AA	AA	AA	BB	AA	AA	AA	AA	AA	AA	AA	AA	AA	AA	AA	AA	AA	AA	AA	NC	AA	AA	AA	BB	AB	AA		AA	AA	AA	AA	AA	AA	AA	AA	AA	AA	AA
167	AX-89780891	AB	AA	AA	AA	AA	AA	AA	AA	AA	AB	AA	AA	AA	AB	AA	AA	AA	AA	AA	AA	AA	AA	AA	AA	AA	AA	AA	AA	AA	NC	AA	AA	AA	AB	AA	AA		AA	AA	AA	AA	AA	AA	AA	AA	AA	AA	AA
168	AX-89779915	AB	AA	AB	AA	AA	AA	AB	AA	AB	AA	AA	AA	AB	AA	AB	AB	AB	AA	AA	AA	AB	AA	AB	AA	AA	AB	AA	AA	AA	AB	AB	AB	AA	AA	AA	AA		AA	AB	AB	AA	AB	AB	AB	AA	AB	AA	AA
169	AX-89803248	AB	BB	AB	AA	BB	AA	AB	AA	AB	AA	BB	BB	AA	AA	AB	AB	AB	BB	BB	BB	AB	BB	AB	BB	BB	AB	BB	BB	BB	AB	AB	AB	BB	AA	AA	BB		BB	AB	AB	BB	AB	AB	AB	BB	AB	BB	BB
170	AX-89818495	AA	BB	AB	AA	BB	AA	AB	AA	AB	AA	BB	BB	AB	AA	AB	AB	AA	BB	BB	BB	AB	BB	AB	BB	BB	AB	BB	BB	BB	AB	AB	AB	BB	AA	AA	BB		BB	AB	AB	BB	AB	AB	AB	BB	AB	BB	BB
171	AX-89818075	AA	AA	AB	AA	AA	AB	AB	AA	AB	NC	AA	AA	BB	AA	AB	AB	NC	AA	AA	AA	AB	AA	AB	AA	AA	AB	AA	AA	AA	AB	AB	AB	AA	AA	AA	AA		AA	AB	AB	AA	AB	AB	AB	AA	AB	AA	AA
172	AX-89780280	AB	BB	AA	BB	AB	BB	AB	BB	AB	AB	AB	BB	AB	AB	AA	AB	AB	BB	BB	BB	AB	BB	AB	BB	BB	AB	BB	BB	AB	NC	AB	AB	AB	BB	BB	BB		NC	AB	AB	NC	AB	AB	AB	NC	AB	NC	NC
173	AX-89780309	AA	AA	AB	AA	AA	AA	AB	AA	AB	AA	AA	AA	BB	AA	AB	AB	BB	AA	AA	AA	AB	AA	AB	AA	AA	AB	AA	AA	AA	AB	AB	AB	AA	AA	AA	AA		AA	AB	AB	AA	AB	AB	AB	AA	AB	AA	AA
174	AX-89818448	AA	BB	AB	AA	BB	AA	AB	AB	AB	AB	BB	BB	AB	AA	AB	AB	AA	BB	BB	BB	AB	BB	AB	BB	BB	AB	BB	BB	BB	AB	AB	AB	BB	AB	AA	BB		BB	AB	AB	BB	AB	NC	NC	BB	AB	BB	BB
175	AX-89779690	AA	BB	AB	AA	BB	AA	AB	AA	AB	AA	BB	BB	AA	AA	AB	AB	AA	BB	BB	BB	AB	BB	AB	BB	BB	AB	BB	BB	BB	AB	AB	AB	BB	AA	AA	BB		BB	AB	AB	BB	AB	AB	AB	BB	AB	BB	BB
176	AX-89874843	AB	BB	AB	AA	BB	AA	AB	AB	AB	AB	BB	BB	NC	BB	NC	AB	AA	BB	BB	BB	AB	BB	AB	BB	BB	AB	BB	BB	BB	AB	AB	AB	BB	AA	AA	BB		BB	AB	AB	BB	AB	AB	AB	BB	AB	BB	BB
177	AX-89874851	AB	BB	AB	AA	BB	AA	AB	AB	AB	AB	BB	BB	AB	BB	AB	AB	NC	BB	BB	BB	AB	BB	AB	BB	BB	AB	BB	BB	BB	AB	AB	AB	BB	AA	AA	BB		BB	AB	NC	BB	AB	AB	AB	BB	AB	BB	BB
178	AX-89816416	BB	AA	AB	BB	AA	BB	AB	BB	AA	BB	AB	AB	AA	BB	AA	AB	AB	AB	AB	AB	AB	AB	AA	AA	AA	AB	AB	AB	AB	AA	AA	AA	AB	BB	BB	AB		AA	AB	BB	AA	BB	AA	BB	AB	BB	AB	AA
179	AX-89873799	BB	BB	AB	BB	BB	BB	AA	AB	AB	BB	AB	AA	BB	AB	AB	AB	AB	AB	AA	AA	AB	AB	BB	AB	BB	AA	AA	AB	AB	BB	AB	BB	AA	AB	BB	AA		AB	AB	AA	AB	AA	AB	AB	AA	AA	AB	AB
180	AX-89816838	BB	BB	BB	AB	BB	BB	AB	BB	AB	BB	BB	AB	NC	BB	AB	BB	BB	AB	AB	AB	BB	BB	AB	AB	NC	AB	AB	AB	BB	NC	AB	AB	AB	BB	BB	AB		AB	BB	BB	AB	BB	BB	BB	AB	BB	AB	AB
181	AX-89779088	AA	AA	AB	AA	AA	AA	AB	AA	AA	AA	AB	AB	AB	AA	AA	AB	AB	NC	AB	AB	AB	AB	AA	NC	AA	BB	AB	AA	AB	AA	AA	AA	AB	AA	AA	AB		AA	AB	BB	AA	BB	AB	AB	AB	BB	AA	AA
182	AX-89779080	AB	BB	AB	AB	BB	AB	AB	AB	AB	BB	AB	AB	BB	AB	AB	AB	AB	AB	AA	AA	BB	AB	BB	AB	BB	AB	AA	AB	AB	BB	AB	BB	AA	AB	BB	AA		AB	AB	AB	AB	AB	BB	AB	AA	AB	AB	AB
183	AX-89846899	BB	AB	AB	BB	BB	AB	AA	BB	AB	BB	AB	AB	BB	AB	AB	AB	AB	AB	AA	AA	BB	AB	BB	AA	BB	AB	AA	AB	AB	BB	AB	BB	AA	BB	BB	AA		AB	AB	AB	AB	AB	BB	AB	AA	AB	AB	AB
184	AX-89811571	BB	AB	AB	BB	AA	BB	BB	BB	AB	BB	AB	AB	AB	BB	AB	AB	AB	AB	BB	BB	AA	AB	AA	BB	AA	AB	BB	AB	AB	AA	AB	AA	AB	BB	BB	BB		AB	AB	AB	AB	AB	AA	AB	BB	AB	AB	AB
185	AX-89816179	BB	AB	BB	AB	BB	AB	BB	AB	AB	AB	BB	BB	AA	BB	BB	BB	AB	NC	BB	BB	BB	AB	AB	NC	AB	BB	AB	AB	AB	BB	AB	BB	BB	BB	AB	BB		BB	BB	BB	BB	BB	BB	BB	BB	BB	BB	BB
186	AX-89846828	NC	AA	AB	BB	BB	AA	AA	BB	AA	NC	AB	AB	AB	AB	AB	AB	AA	AB	AA	AA	BB	AA	AB	AA	AB	AB	AA	AA	AA	BB	AA	BB	AA	AB	AA	AA		AB	AB	AB	AB	AB	BB	AB	AA	AB	AB	AB
187	AX-89816922	BB	BB	AB	BB	NC	BB	BB	BB	BB	BB	AB	AB	AB	BB	AB	AA	AB	AB	BB	BB	AA	BB	AB	BB	AB	AB	BB	BB	BB	AA	BB	NC	BB	BB	BB	BB		AB	AB	AB	AB	AB	AA	AB	BB	AB	AB	AB
188	AX-89803150	BB	AA	AB	BB	BB	BB	AB	AB	AB	BB	AB	AB	AB	BB	AB	BB	AB	AB	AA	AB	BB	AA	AB	AA	AB	AB	AA	AA	AA	BB	AA	NC	AA	BB	BB	AA		AB	AB	AB	AB	AB	BB	AB	AA	AB	AB	AB
189	AX-89779152	BB	BB	AB	AB	AA	BB	BB	AB	BB	BB	AB	AB	AB	NC	AB	AA	AB	AB	BB	BB	AA	BB	AB	BB	AB	AB	BB	BB	BB	AA	BB	AA	BB	AB	AB	BB		AB	AB	AB	AB	AB	AA	AB	BB	AB	AB	AB
190	AX-89779173	AA	AA	AB	AB	BB	AA	AB	AB	AB	AA	AB	AB	AB	NC	AB	BB	AB	AB	AA	AB	BB	AA	AB	AA	AB	AB	AA	AA	AA	BB	AA	BB	AA	AB	AB	AA		AB	AB	AB	AB	AB	BB	AB	AA	AB	AB	AB
191	AX-89815932	BB	AB	AB	BB	BB	BB	AB	BB	BB	BB	AB	AB	AB	BB	AB	BB	BB	AB	AB	AB	BB	AB	AB	AB	BB	BB	AB	AB	AB	BB	AB	BB	AA	BB	BB	AA		AB	AB	AB	AB	AB	BB	AB	AA	AB	AB	AB
192	AX-89846807	AA	AB	BB	AA	AA	AA	BB	AA	AB	AA	AB	AB	AB	AA	AB	AB	AA	AB	BB	AB	AA	AB	AB	AA	AA	AA	BB	AB	AB	AA	AB	AA	BB	AB	AA	BB		BB	BB	AB	BB	AB	AB	BB	BB	AB	BB	BB
193	AX-89873099	AA	AA	AB	AB	BB	AB	AB	AB	AA	AB	AB	AB	BB	AA	AB	BB	AB	AB	AA	AB	BB	AA	BB	AB	AB	AB	AB	AA	AA	BB	AA	BB	AA	AB	BB	AA		AB	AB	AB	AB	AB	BB	AB	AA	AB	AB	AB
194	AX-89815831	AA	BB	BB	AA	AA	AA	AB	AA	BB	AA	AB	AB	AB	AA	BB	AB	AB	AB	BB	AB	AA	BB	AA	NC	AB	AB	BB	BB	BB	AA	BB	AB	BB	AA	AA	BB		BB	BB	AB	BB	AB	AB	BB	BB	AB	BB	BB
195	AX-89876343	AA	BB	BB	AA	AA	AA	AB	AA	BB	AA	AB	BB	AB	AA	BB	AB	AB	AB	BB	AB	AA	BB	AA	AB	AB	BB	BB	BB	BB	AA	BB	BB	BB	AA	AA	BB		BB	BB	BB	BB	BB	BB	BB	BB	BB	BB	BB
196	AX-89780892	AA	BB	AB	AA	AA	AA	AB	AA	BB	AA	AB	BB	AA	AA	AB	AA	AB	AB	BB	AB	AA	BB	AA	AB	AB	BB	BB	BB	BB	AA	BB	AA	BB	AA	AA	BB		AB	AB	BB	AB	BB	AB	AB	BB	BB	AB	AB
197	AX-89819177	AB	AA	AB	BB	BB	BB	AB	AB	AA	BB	AB	AA	BB	AA	AB	BB	AB	AB	AA	AB	BB	AA	BB	AB	AB	AA	AA	AA	AA	BB	AA	BB	AA	BB	BB	AA		AB	AB	AA	AB	AA	AB	AB	AB	AA	AB	AB
198	AX-89817431	BB	BB	BB	BB	AA	BB	AB	BB	BB	BB	AB	BB	AA	BB	BB	AB	AB	AB	BB	AB	AA	BB	AA	AB	AB	BB	BB	BB	BB	NC	BB	AB	BB	BB	BB	BB		BB	BB	BB	BB	BB	BB	BB	BB	BB	BB	BB
199	AX-89874790	AA	AA	AA	AB	AA	AA	AA	AA	AA	AA	AA	AA	AA	AB	AA	AA	AA	AA	AA	AA	AA	AA	AA	AA	AA	AA	AA	AA	AA	NC	AA	AA	AA	AA	AA	AA		AA	AA	AA	AA	AA	AA	AA	AA	AA	AA	AA
200	AX-89862714	AA	AA	AA	AB	AA	AA	AA	AB	AA	AB	AA	AA	AA	AA	AA	AA	AA	AA	AA	AA	AA	AA	AA	AA	AA	AA	AA	AA	AA	NC	AA	AA	AA	AB	AA	AA		AA	AA	AA	AA	AA	AA	AA	AA	AA	AA	AA
201	AX-89817745	BB	BB	AB	BB	BB	BB	AB	BB	AB	BB	BB	BB	AB	BB	AB	AB	AA	BB	BB	BB	AB	BB	AB	BB	BB	AB	BB	BB	BB	AB	AB	AB	BB	BB	BB	BB		BB	AB	AB	BB	AB	AB	AB	BB	AB	BB	BB
202	AX-89817998	AA	AA	AB	AA	AA	AB	AB	AA	AB	AA	AA	AA	BB	AA	AB	AB	AB	AB	AA	AA	AB	AA	AB	AA	AA	AB	AA	AA	AA	AB	NC	AB	AA	AA	AA	AA		AA	AB	AB	AA	AB	AB	AB	AA	AB	AA	AA
203	AX-89910397	BB	BB	AB	BB	BB	BB	NC	BB	BB	BB	BB	BB	AA	BB	AB	AB	AB	BB	BB	BB	AB	BB	AB	BB	BB	AB	BB	BB	BB	AB	AB	AB	BB	BB	BB	BB		BB	AB	AB	BB	AB	AB	AB	BB	AB	BB	BB
204	AX-89779603	AA	AA	AB	AA	AA	AA	AB	AB	AA	AB	AA	AA	BB	NC	AB	AB	AB	AA	AA	AA	AB	AA	AB	AA	AA	AB	AB	AA	AA	AB	AB	AB	AA	AB	AB	AA		AA	AB	AB	AA	AB	AB	AB	AA	AB	AA	AB
205	AX-89817553	BB	AA	AB	BB	AA	BB	AB	BB	AA	BB	AA	AA	BB	AB	AB	AB	AB	AA	AA	AA	BB	AA	AB	AA	AA	AB	AA	AA	AA	AB	AB	AB	AA	BB	BB	AA		AA	AB	AB	AA	AB	AB	AB	AA	AB	AA	AB
206	AX-89779044	BB	AA	AA	BB	BB	BB	AA	AB	AB	NC	AA	AB	AA	BB	AA	AA	AA	BB	AA	AA	AA	AA	AB	AA	AB	AB	AB	AA	AB	AB	AB	AB	BB	BB	BB	AB		AB	AB	AB	AA	AB	AB	AB	AB	AB	AB	AA
207	AX-89780112	BB	AA	AB	BB	BB	BB	AB	BB	AB	BB	AA	AB	AB	BB	NC	AB	AB	BB	AA	AA	BB	AA	BB	AA	AB	BB	AB	AA	AB	BB	BB	BB	BB	BB	BB	AB		AB	BB	BB	AA	AB	BB	BB	AB	BB	AB	AA
208	AX-89779998	BB	BB	BB	NC	BB	BB	BB	AB	BB	AB	BB	BB	BB	BB	BB	BB	BB	BB	BB	BB	BB	BB	BB	BB	BB	BB	BB	BB	BB	NC	BB	BB	BB	BB	BB	BB		BB	BB	NC	BB	BB	BB	BB	BB	BB	BB	BB
209	AX-89875352	AB	AA	AB	AB	BB	AB	AB	AA	AB	BB	AA	AB	AB	AB	BB	AB	AB	BB	AA	AA	BB	AA	BB	AA	AB	BB	AB	AA	AB	BB	BB	BB	BB	AB	AA	AB		AB	BB	BB	AA	AB	BB	BB	AB	BB	AB	AB
210	AX-89780159	BB	AA	AA	AB	AA	BB	AA	AB	AA	AA	AA	AA	AA	AB	AA	AA	AA	AA	AA	AA	AA	AA	AA	AA	AA	AA	AA	AA	AA	NC	AA	AA	AA	BB	AB	AA		AA	AA	NC	AA	AA	AA	AA	AA	AA	AA	AA
211	AX-89874624	AA	AA	AA	AA	BB	AA	AA	AB	AA	AA	AA	AA	AA	AB	AB	AA	AA	AB	AA	AA	AA	NC	AA	AA	AA	AA	AA	AA	AB	AA	AA	AA	BB	AB	AB	AA		NC	NC	NC	AA	NC	NC	AA	NC	NC	NC	NC
212	AX-89778381	AA	AB	AB	AB	BB	AB	AB	AB	BB	AA	BB	BB	AB	BB	BB	AA	BB	BB	AB	BB	BB	AB	BB	BB	BB	BB	BB	BB	AB	BB	AB	AB	BB	AA	AB	AB		AB	BB	BB	AB	BB	BB	BB	AB	BB	AB	BB
213	AX-89816904	BB	AB	AB	BB	AB	BB	AA	AB	BB	BB	BB	BB	AA	BB	AB	AB	AA	AB	BB	BB	BB	AB	BB	BB	BB	BB	BB	BB	AB	BB	AA	AB	AB	BB	BB	BB		AB	AB	BB	NC	BB	BB	AB	NC	AB	AB	BB
214	AX-89816173	AA	BB	BB	AA	AB	AA	BB	AA	BB	AA	BB	AB	AB	AA	AB	BB	AB	AB	BB	BB	BB	BB	AB	BB	BB	BB	BB	AB	BB	BB	BB	NC	BB	AA	AA	BB		BB	AB	BB	AB	AB	BB	AB	AB	AB	BB	BB
215	AX-89815887	AA	AA	AA	AB	AA	NC	AB	NC	AB	AA	AB	AA	AA	AB	AA	AA	AB	AA	AB	AB	AB	AA	AA	AB	AB	AA	AB	AA	AA	AB	AB	AA	AA	AB	AB	AB		NC	NC	NC	AA	NC	NC	NC	AA	NC	NC	NC
216	AX-89778514	AB	AB	AB	AB	AA	AB	AA	BB	BB	AB	BB	AB	AB	AB	AB	AA	AA	AA	BB	BB	BB	AB	NC	BB	BB	AB	BB	AB	AB	BB	AA	AA	AB	AB	AB	BB		AB	AB	BB	AA	AB	BB	AB	AA	AB	BB	AB
217	AX-89816066	AA	AB	AB	AA	AA	AA	BB	AA	BB	AA	BB	AB	AA	AA	AB	AA	AB	AA	BB	BB	BB	AB	AB	BB	BB	AB	BB	AB	AB	BB	AB	AA	AB	AA	AA	BB		AB	AB	BB	AA	AB	BB	AB	AA	AB	BB	AB
218	AX-89856696	AB	AB	AB	AA	BB	AB	AA	AA	AA	AA	AA	AB	BB	AA	NC	BB	AB	BB	AA	AA	AA	AB	AB	AA	AA	AB	AA	AB	AB	AA	AB	BB	AB	AA	AB	AA		BB	AB	AA	BB	AB	AA	AB	BB	AB	AA	AB
219	AX-89815824	BB	AA	AA	BB	AA	BB	AA	AB	AA	BB	AA	AA	AB	BB	AA	AA	AA	AA	AA	AA	AA	AA	AA	AA	AA	AA	AA	AA	AA	NC	AA	AA	AA	BB	BB	AA		AA	AA	AA	AA	AA	AA	AA	AA	AA	AA	AA
220	AX-89815993	BB	AA	AA	AB	AA	AB	AA	AB	AA	BB	AA	AA	AB	AB	AA	AA	AA	AA	AA	AA	AA	AA	AA	AA	AA	AA	AA	AA	AA	NC	AA	AA	AA	BB	AB	AA		AA	AA	AA	AA	AA	AA	AA	AA	AA	AA	AA
221	AX-89819263	BB	BB	BB	AB	BB	BB	BB	AB	BB	AB	BB	BB	NC	BB	BB	BB	BB	BB	BB	BB	BB	BB	BB	BB	BB	BB	BB	BB	BB	NC	BB	AB	BB	AB	BB	BB		BB	BB	BB	BB	BB	BB	BB	BB	BB	BB	BB
222	AX-89855279	BB	BB	BB	BB	AA	BB	BB	BB	BB	BB	AB	AA	AB	BB	AA	AB	AB	AA	AA	BB	AB	BB	AA	AB	AB	AB	AB	AB	BB	AA	BB	AA	AA	BB	AB	AB		AB	AB	NC	AB	AB	AB	AB	AB	AB	AB	AB
223	AX-89821260	AA	BB	AB	BB	AA	AA	AB	AB	BB	AB	AB	BB	BB	BB	AB	BB	AB	BB	BB	BB	BB	BB	BB	BB	BB	BB	BB	BB	AB	AB	AB	AB	AA	BB	BB	BB		AB	AB	AB	AB	AB	BB	BB	BB	AB	BB	BB
224	AX-89782475	BB	AA	AA	BB	BB	BB	AB	BB	AA	BB	AA	AB	AA	BB	AB	AB	AB	AB	AB	AA	AB	AA	AA	AB	AA	AB	AB	AB	AA	BB	AB	BB	BB	BB	BB	AA		AB	AB	AB	AB	AB	AA	AA	AA	AB	AA	AA
225	AX-89851508	BB	BB	BB	BB	AA	BB	AA	BB	BB	BB	AB	AA	AB	BB	AA	AB	AB	AA	AA	BB	AB	BB	AA	AB	AB	AB	AB	AB	BB	AA	AA	AA	AA	BB	AB	AB		AB	AB	NC	AB	AB	AB	AB	AB	AB	AB	AB
226	AX-89907485	AA	BB	BB	AA	AA	AA	AA	AA	BB	AA	AB	AA	AB	AB	AA	AB	AB	AA	AA	BB	AB	BB	AA	AB	AB	AB	AB	AB	BB	AA	AA	AA	AA	AA	AB	AB		AB	AB	NC	AB	AB	AB	AB	AB	AB	AB	AB
227	AX-89821256	BB	BB	BB	BB	AA	BB	AB	BB	BB	BB	BB	AB	BB	AA	AB	AB	AB	AB	AB	BB	AB	BB	BB	AB	BB	AB	BB	AB	BB	AA	AB	AA	AA	BB	BB	BB		AB	AB	AB	AB	AB	BB	BB	BB	AB	BB	BB
228	AX-89847379	BB	BB	BB	BB	AB	AB	AB	AB	BB	BB	BB	NC	BB	AB	AB	AB	AB	AB	AB	BB	AB	BB	BB	AB	BB	NC	AB	AB	BB	AA	AB	NC	AB	AA	AA	AB		AB	AB	AB	AB	AB	BB	BB	BB	AB	BB	BB
229	AX-89821241	AA	BB	BB	AA	AA	AA	AB	AA	BB	AA	BB	AB	BB	AA	AB	AB	AB	AB	AB	BB	AB	BB	BB	AB	BB	AB	BB	AB	BB	AA	AB	AA	AA	AA	AA	BB		AB	AB	AB	AB	AB	BB	BB	BB	AB	BB	BB
230	AX-89821253	AA	BB	BB	AA	AA	AA	AB	AA	BB	AA	BB	AB	BB	AA	AB	AB	AB	AB	AB	BB	AB	BB	BB	AB	BB	AB	BB	AB	BB	AA	AB	AA	AA	AA	AA	BB		AB	AB	AB	AB	AB	BB	BB	BB	AB	BB	BB
231	AX-89782477	AB	AA	AA	AA	BB	AA	AB	AB	AA	AB	AA	AB	AA	AA	AB	AB	AB	AB	AB	AA	AB	AA	AA	AB	AA	AB	AA	AB	AA	BB	AB	BB	BB	NC	AA	AA		AB	AB	AB	AB	AB	AA	AA	AA	AB	AA	AA
232	AX-89782469	BB	AA	AA	BB	BB	BB	AA	AB	AB	BB	AA	BB	AA	BB	AB	BB	AA	BB	BB	AB	AB	AA	AB	BB	AB	BB	AB	BB	AA	BB	AA	BB	BB	BB	BB	AB		AB	AB	AB	AB	AB	NC	NC	NC	AB	NC	NC
233	AX-89821160	AB	BB	BB	BB	AA	BB	AB	AB	AB	BB	BB	AB	BB	BB	AB	AB	AB	AB	AB	BB	AB	BB	BB	AB	BB	AB	BB	AB	BB	AA	AB	AA	AA	BB	BB	BB		AB	AB	AB	AB	AB	BB	BB	BB	AB	BB	BB
234	AX-89904487	AA	AA	AA	BB	BB	AB	AB	AB	AB	AB	AA	AB	AA	AB	AB	AB	AB	AB	AB	AA	AB	AA	AA	AB	AA	AB	AA	AB	AA	BB	AB	BB	BB	AB	BB	AA		AB	AB	AB	AB	AB	AA	AA	AA	AB	AA	AA
235	AX-89821174	BB	BB	BB	BB	AA	BB	AB	BB	AB	BB	BB	AB	BB	BB	AB	AB	AB	AB	AB	BB	AB	BB	BB	AB	BB	AB	BB	AB	BB	AA	AB	AA	AA	BB	BB	BB		AB	AB	AB	AB	AB	BB	BB	BB	AB	BB	BB
236	AX-89782459	AB	BB	BB	AA	AA	AA	AB	AA	BB	AA	BB	AB	BB	AA	AB	AB	AB	NC	AB	BB	AB	BB	BB	AB	BB	AB	BB	AB	BB	AA	AB	AB	AA	AA	AA	BB		AB	AB	AB	AB	AB	BB	BB	BB	AB	BB	BB
237	AX-89821195	BB	AA	AA	BB	BB	BB	AB	AB	AB	BB	AA	AB	AA	BB	AB	AB	AB	AB	AB	AB	AB	AA	AA	NC	AA	NC	AA	AB	AA	BB	AB	BB	BB	BB	BB	AB		AB	AB	AB	AB	AB	AA	AA	AA	AB	AA	AA
238	AX-89862918	BB	NC	BB	BB	AA	AB	BB	BB	AB	BB	BB	AB	BB	BB	AB	AB	BB	AB	AB	BB	AB	BB	BB	AB	BB	AB	BB	AB	BB	AA	BB	AA	AA	BB	BB	BB		AB	AB	AB	AB	AB	AB	BB	BB	AB	BB	BB
239	AX-89904485	BB	BB	BB	AB	AA	AB	AB	AB	AB	AB	BB	AB	BB	AB	AB	AB	AB	AB	AB	BB	AB	BB	BB	AB	BB	AB	BB	AB	BB	AA	AB	AA	AA	AB	AB	BB		AB	AB	AB	AB	AB	BB	BB	BB	AB	BB	BB
240	AX-89782385	BB	BB	BB	BB	AA	BB	AB	BB	AB	BB	BB	AB	BB	BB	AB	AB	AB	AB	AB	BB	AB	BB	AB	AB	BB	AB	BB	AB	BB	AA	AB	AA	AA	BB	BB	BB		AB	AB	AB	AB	AB	BB	BB	BB	AB	BB	BB
241	AX-89821225	AA	BB	BB	AA	AA	AA	AB	AA	BB	AA	BB	AB	BB	AB	AB	AB	AB	AB	AB	BB	AB	BB	BB	AB	NC	AB	BB	AB	BB	AA	AB	AA	AA	AA	AA	BB		AB	AB	AB	AB	AB	BB	BB	BB	AB	BB	BB
242	AX-89821108	AA	AA	AA	AA	BB	AA	AB	AA	AB	AA	AA	AB	AA	AA	AB	AB	AB	AB	AB	AA	AB	AA	AB	AB	AA	AB	AA	AB	AA	BB	AB	BB	BB	AA	AA	AA		AB	AB	AB	AB	AB	AA	AA	AA	AB	AA	AA
243	AX-89821141	AA	BB	BB	AA	AA	AA	AB	AB	AB	AA	BB	AB	BB	AA	AB	AB	AB	AB	AB	BB	AB	BB	BB	AB	BB	AB	BB	AB	BB	AA	AB	AA	AA	AA	AA	BB		AB	AB	AB	AB	AB	BB	BB	BB	AB	BB	BB
244	AX-89872337	AA	BB	BB	AA	AA	AA	AB	AA	AB	AA	BB	AB	BB	AA	AB	AB	AB	AB	AB	BB	AB	BB	AB	AB	BB	AB	BB	AB	BB	AA	AB	AA	AA	AA	AA	BB		AB	AB	AB	AB	AB	BB	BB	BB	AB	BB	BB
245	AX-89821206	AB	AA	AA	AB	BB	AB	AB	AB	AA	AB	AA	AB	AA	AA	AB	AB	AB	AB	AB	AA	AB	AA	AA	AB	AA	AB	AA	AB	AA	BB	AB	BB	BB	AB	AA	AA		AB	AB	AB	AB	AB	AA	AA	AA	AB	AA	AA
246	AX-89806705	AA	BB	BB	AB	AA	AA	AB	AB	AB	AB	BB	AB	BB	AA	AB	AB	AB	AB	AB	BB	AB	BB	AB	AB	BB	AB	BB	AB	BB	AA	AB	AA	AA	AA	AA	BB		AB	AB	AB	AB	AB	BB	BB	BB	AB	BB	BB
247	AX-89821000	AA	AA	AA	AB	BB	AA	AB	BB	AB	AB	AA	AB	AA	BB	AB	AB	AB	AB	AB	AA	AB	AA	AB	AB	AA	AB	AA	AB	AA	BB	AB	BB	BB	AB	AB	AA		AB	AB	AB	AB	AB	AA	AA	AA	AB	AA	AA
248	AX-89904482	AB	AA	AA	AA	BB	AB	AB	AB	AB	AB	AA	AB	AA	AA	AB	AB	AB	AB	AB	AA	AB	AA	AB	AB	AA	AB	AA	AB	AA	BB	AB	BB	BB	AA	AA	AA		AB	AB	AB	AB	AB	AA	AA	AA	AB	AA	AA
249	AX-89904479	AB	AA	AA	AB	BB	AB	AB	AB	AB	AA	AA	AB	AA	AB	AB	AB	AB	AB	AB	AA	AB	AA	AB	AB	AA	AB	AA	AB	AA	BB	AB	BB	BB	AB	AB	AA		AB	AB	AB	AB	AB	AA	AA	AA	AB	AA	AA
250	AX-89904478	AB	BB	BB	AB	AA	AB	AB	AB	AB	BB	BB	AB	BB	AB	AB	AB	AB	AB	AB	BB	AB	BB	AB	AB	BB	AB	BB	AB	BB	AA	AB	AA	AA	NC	AB	BB		AB	AB	AB	AB	AB	BB	BB	BB	AB	BB	BB
251	AX-89782346	AA	BB	BB	AA	AA	AA	AB	AA	AB	AA	AB	AB	BB	NC	AB	AB	AB	AB	AB	BB	AB	BB	AB	AB	BB	AB	AB	AB	BB	AA	AB	AA	AA	AA	AA	BB		AB	AB	AB	AB	AB	BB	BB	BB	AB	BB	BB
252	AX-89821031	AB	AA	AA	BB	BB	BB	AB	AA	AB	BB	AA	AB	AA	AA	AB	AB	AB	AB	AB	AA	AB	AA	AB	AB	AA	AB	AA	AB	AA	BB	AB	NC	BB	BB	BB	AA		AB	AB	AB	AB	AB	AA	AA	AA	AB	AA	AA
253	AX-89904476	BB	BB	BB	BB	AA	BB	AB	BB	AB	BB	BB	AB	BB	BB	AB	AB	AB	AB	AB	BB	AB	BB	AB	AB	BB	AB	BB	AB	BB	AA	AB	AA	AA	BB	BB	BB		AB	AB	AB	AB	AB	BB	BB	BB	AB	BB	BB
254	AX-89806701	AA	BB	BB	AA	AA	AA	AB	AA	AB	AA	BB	AB	BB	AA	AB	AB	AB	AB	AB	BB	AB	BB	AB	AB	BB	AB	BB	AB	BB	AA	AB	AA	AA	AA	AA	BB		AB	AB	AB	AB	AB	BB	BB	BB	AB	BB	BB
255	AX-89821017	BB	AA	AB	BB	BB	BB	AB	AA	AB	BB	AB	AB	AA	BB	BB	AB	AB	AB	AB	AA	AB	AA	AB	AB	AA	AB	AA	AB	AB	BB	AB	BB	BB	BB	BB	AA		AB	AB	AB	AB	AB	AA	AA	AA	AB	AA	AA
256	AX-89847360	AA	BB	BB	AB	AA	AA	AB	AB	AB	AA	BB	AB	BB	AA	AB	AB	AB	AB	AB	BB	AB	BB	AB	AB	BB	AB	BB	AB	BB	AA	AB	AA	AA	AA	AA	BB		AB	AB	AB	AB	AB	BB	BB	BB	AB	BB	BB
257	AX-89847361	AB	BB	BB	BB	AA	AB	AB	BB	AB	AB	BB	AB	BB	AB	AB	AB	AB	AB	AB	BB	AB	BB	AB	AB	BB	AB	BB	AB	BB	AA	AB	AA	AA	AB	AA	BB		AB	AB	AB	AB	AB	BB	BB	BB	AB	BB	BB
258	AX-89782368	AA	AA	AA	AA	AA	AA	AA	BB	AA	AA	AA	AA	AA	AA	AA	AA	AA	AA	AA	AA	AA	AA	AA	AA	AA	AA	AA	AA	AA	NC	AA	AA	AA	AA	BB	AA		AA	AA	AA	AA	AA	AA	AA	AA	AA	AA	AA
259	AX-89782345	AA	BB	BB	AA	AA	AA	AB	AA	AB	AA	BB	AB	BB	NC	AB	AB	AB	AB	AB	BB	AB	BB	AB	AB	BB	AB	BB	AB	BB	AA	AB	AB	AA	AA	AA	BB		AB	AB	AB	AB	AB	BB	BB	BB	AB	BB	BB
260	AX-89782336	AA	BB	BB	AA	AA	AA	AB	AA	AB	AA	BB	AB	BB	AA	AB	AB	AB	AB	AB	BB	AB	BB	AB	AB	BB	AB	BB	AB	BB	AA	AB	AA	AA	AA	AA	BB		AB	AB	AB	AB	AB	BB	BB	BB	AB	BB	BB
261	AX-89904477	BB	AA	AA	BB	BB	BB	AB	BB	AB	BB	AA	AB	NC	BB	AB	AB	AB	AB	AB	AA	AB	AA	AB	AB	AA	AB	AA	AB	AA	BB	AB	BB	BB	BB	BB	AA		AB	AB	AB	AB	AB	AA	AA	AA	AB	AA	AA
262	AX-89904474	AB	BB	BB	AB	AA	AB	AB	AB	AB	AA	BB	AB	BB	AB	AB	AB	AB	AB	AB	BB	AB	BB	AB	AB	BB	AB	BB	AB	BB	AA	AB	AA	AA	AB	AB	BB		AB	AB	AB	AB	AB	BB	BB	BB	AB	BB	BB
263	AX-89904543	AA	BB	BB	AB	BB	AA	BB	AA	BB	AA	BB	BB	BB	AA	BB	BB	BB	BB	BB	BB	BB	BB	BB	NC	BB	BB	BB	BB	BB	NC	BB	AB	BB	AA	AA	BB		BB	BB	BB	BB	BB	BB	BB	BB	BB	BB	BB
264	AX-89782970	BB	BB	BB	AB	BB	BB	BB	AA	BB	AB	BB	BB	BB	NC	BB	BB	BB	BB	BB	BB	BB	BB	BB	BB	BB	BB	BB	BB	BB	NC	BB	BB	BB	BB	BB	BB		BB	BB	BB	BB	BB	BB	BB	BB	BB	BB	BB
265	AX-89783072	AA	AB	AA	AA	BB	AA	AB	AA	AB	AA	AA	AB	AA	AA	AB	BB	BB	AB	AB	AA	BB	AA	AB	BB	AB	AB	AA	BB	AA	BB	AB	BB	BB	AA	AA	AA		AB	AB	AB	AB	AB	AA	AA	AA	AB	AA	AA
266	AX-89821929	BB	AA	AA	AB	AA	BB	AA	NC	AA	BB	AA	AA	AA	BB	AA	AA	AA	AA	AA	AA	AA	AA	AA	AA	AA	AA	AA	AA	AA	NC	AA	AA	AA	BB	BB	AA		AA	AA	AA	AA	AA	AA	AA	AA	AA	AA	AA
267	AX-89820994	AB	AB	BB	BB	AA	AB	NC	AB	AB	BB	BB	AB	BB	AB	AB	AA	AA	AB	AB	BB	AA	BB	AB	AA	AB	AB	BB	AA	BB	AA	AB	AA	AA	BB	BB	BB		AB	AB	AB	AB	AB	BB	BB	BB	AB	BB	BB
268	AX-89783025	AB	AA	AA	BB	AA	BB	AB	BB	AA	BB	AB	AB	AB	NC	AB	AA	AA	AB	AB	AA	AA	AA	AB	AA	AB	AA	AB	AA	AA	AA	AB	AA	AA	BB	BB	AB		AA	AA	AB	AA	AA	AB	AB	AB	AA	AB	AB
269	AX-89847448	AA	BB	BB	AB	BB	AA	AB	AB	BB	AB	AB	AB	AB	AB	AB	BB	BB	AB	AB	BB	BB	BB	AB	BB	AB	BB	AB	BB	BB	BB	AB	BB	BB	AA	AA	AB		BB	BB	AB	BB	BB	AB	AB	AB	BB	AB	AB
270	AX-89822094	BB	AA	AB	BB	AA	BB	AB	BB	AB	BB	AB	AB	BB	BB	AA	NC	AA	AA	NC	NC	AA	AB	AA	AA	AA	AA	AB	AA	AB	AA	AB	AA	AA	BB	BB	AB		AB	AB	AB	AB	AB	BB	BB	BB	AB	BB	BB
271	AX-89822051	BB	AA	AA	BB	AA	BB	AB	AB	AA	BB	AB	AB	NC	BB	AB	AA	AA	AB	AB	AA	AA	AA	AB	AA	AB	AA	AB	AA	AA	AA	AB	AA	AA	BB	BB	AB		AA	AA	AB	AA	AA	AB	AB	AB	AA	AB	AB
272	AX-89879229	AB	BB	BB	AB	BB	BB	AB	AA	BB	AB	AB	AB	AB	BB	AB	BB	BB	AB	AB	BB	BB	BB	AB	BB	AB	BB	AB	BB	BB	NC	AB	BB	BB	BB	AB	AB		BB	BB	AB	BB	BB	AB	AB	AB	BB	AB	AB
273	AX-89783049	BB	AA	AA	BB	AA	BB	AB	BB	AA	BB	AB	AB	AB	BB	AB	AA	AA	AB	AB	AA	AA	AA	AB	AA	AB	AA	AB	AA	AA	AA	AB	AA	AA	BB	BB	AB		AA	AA	AB	AA	AA	AB	AB	AB	AA	AB	AB
274	AX-89878887	AB	AA	AA	AB	AB	AA	NC	BB	AB	AA	AB	AB	AB	AB	AB	AB	AB	AB	AB	AA	AA	AA	AB	AA	AB	AA	AB	AA	AA	AA	AB	AA	AA	BB	BB	AB		AA	AA	AB	AA	AA	NC	NC	AB	AA	AB	AB
275	AX-89904531	AB	BB	BB	AB	BB	AB	AB	AB	BB	BB	AB	AB	AA	AB	AB	BB	BB	AB	AB	BB	BB	BB	AB	BB	AB	BB	AB	BB	BB	BB	AB	BB	BB	AB	AB	AB		BB	BB	AB	BB	BB	AB	AB	AB	BB	AB	AB
276	AX-89821933	BB	AA	AA	BB	AA	BB	AB	BB	AA	BB	AB	AA	AB	BB	AB	AA	AA	AA	AA	AA	AA	AA	AA	AA	AA	AA	AA	AA	AA	AA	AB	AA	AA	BB	BB	AA		AA	AA	NC	AA	AA	NC	NC	NC	AA	NC	NC
277	AX-89806756	AA	AA	AA	AA	AA	AA	AB	AB	AA	AA	AB	AB	AB	AB	AB	AA	AA	AB	AB	AA	AA	AA	AB	AA	AB	AA	AB	AA	AA	AA	AB	AA	AA	AA	AA	AB		AA	AA	AB	AA	AA	AB	AB	AB	AA	AB	AB
278	AX-89782982	AB	AA	AA	BB	AA	AB	AB	BB	AA	BB	AB	AB	AB	AB	AB	AA	AA	AB	AB	AA	AA	AA	AB	AA	AB	AA	AB	AA	AA	AA	AB	AA	AA	BB	BB	AB		AA	AA	AB	AA	AA	AB	AB	AB	AA	AB	AB
279	AX-89879089	BB	BB	BB	BB	BB	BB	AB	BB	BB	BB	AB	AB	AB	BB	AB	BB	BB	AB	AB	BB	BB	BB	AB	BB	AB	BB	AB	BB	BB	BB	AB	BB	BB	BB	BB	AB		BB	BB	AB	BB	BB	AB	AB	AB	BB	AB	AB
280	AX-89782920	AB	BB	BB	AA	BB	AA	AB	AA	BB	AA	AB	AB	AB	NC	AB	BB	BB	AB	AB	BB	BB	BB	AB	BB	AB	BB	AB	BB	BB	BB	AB	BB	BB	AA	AA	AB		BB	BB	AB	BB	BB	AB	AB	AB	BB	AB	AB
281	AX-89847433	AB	NC	NC	BB	NC	AB	AB	BB	AA	AB	AB	AB	AB	AB	AB	AA	AA	AB	AB	AA	AA	AA	AB	AA	AB	AA	AB	AA	NC	AA	AB	AA	AB	AB	AA	AB		AA	AA	AB	AA	NC	AB	AB	AB	AA	AB	AB
282	AX-89815340	BB	BB	BB	BB	BB	BB	AB	BB	BB	BB	AB	AB	AB	BB	AB	BB	BB	AB	AB	BB	BB	BB	AB	BB	AB	BB	AB	BB	BB	BB	AB	BB	BB	BB	BB	AB		BB	BB	AB	BB	BB	AB	AB	AB	BB	AB	AB
283	AX-89821949	AB	BB	BB	AA	BB	AA	AB	AB	BB	AA	AB	AB	AB	AA	AB	BB	BB	AB	AB	BB	BB	BB	AB	BB	AB	BB	AB	BB	BB	BB	AB	BB	BB	AA	BB	AB		BB	BB	AB	BB	BB	AB	AB	AB	BB	AB	AB
284	AX-89782866	AA	AA	NC	AB	AB	AB	AB	AA	AB	AA	AB	AB	AB	AB	AB	AB	AB	AB	AB	AA	AA	AA	AB	AA	AB	AA	AB	AA	AA	AA	AB	AA	AA	AB	AB	AB		AA	AA	AB	AA	AA	AB	AB	AB	AA	AB	AB
285	AX-89847421	AB	AA	AA	BB	AA	AB	AB	BB	AA	AB	AB	AB	AB	AB	AB	AA	AA	AB	AB	AA	AA	AA	AB	AA	AB	AA	AB	AA	AA	AA	AB	AA	AA	AB	AA	AB		AA	AA	AB	AA	AA	AB	AB	AB	AA	AB	AB
286	AX-89821925	AB	AA	AA	AB	AA	AA	AA	AB	AA	AB	AA	AA	AA	AB	AA	AA	AA	AA	AA	AA	AA	AA	AA	AA	AA	AA	AA	AA	AA	NC	AA	AA	AA	AA	AB	AA		AA	AA	AA	AA	AA	AA	AA	AA	AA	AA	AA
287	AX-89821756	AA	BB	BB	AB	AB	AB	BB	AA	AB	AA	BB	BB	BB	AB	BB	AB	AB	NC	BB	BB	BB	BB	BB	BB	BB	NC	BB	BB	BB	NC	BB	BB	BB	AA	AA	BB		BB	BB	BB	BB	BB	BB	BB	BB	BB	BB	BB
288	AX-89821986	AA	AA	AA	AA	AA	AA	AA	AA	AA	AA	AA	AA	AB	AA	AA	AA	AA	AA	AA	AA	AA	AA	AA	AA	AA	AA	AA	AA	AA	AA	AA	AA	AA	AA	AA	AA		AA	AA	AA	AA	AA	NC	NC	NC	AA	NC	NC
289	AX-89911394	BB	BB	BB	BB	BB	BB	BB	BB	BB	BB	BB	BB	BB	BB	BB	BB	BB	BB	BB	BB	BB	BB	BB	BB	BB	BB	BB	BB	BB	NC	BB	BB	BB	AB	BB	BB		BB	BB	BB	BB	BB	BB	BB	BB	BB	BB	BB
290	AX-89907565	BB	BB	BB	AB	BB	AB	BB	AA	BB	BB	BB	BB	BB	BB	BB	BB	BB	BB	BB	BB	BB	BB	BB	BB	BB	BB	BB	BB	BB	NC	BB	BB	BB	BB	BB	BB		BB	BB	BB	BB	BB	BB	BB	BB	BB	BB	BB
291	AX-89911393	AB	BB	BB	BB	BB	BB	BB	BB	BB	BB	BB	BB	BB	AB	BB	BB	BB	BB	BB	BB	BB	BB	BB	BB	BB	BB	BB	BB	BB	NC	BB	BB	BB	AB	AA	BB		BB	BB	BB	BB	BB	BB	BB	BB	BB	BB	BB
292	AX-89781458	BB	BB	BB	BB	BB	BB	BB	AB	AB	NC	AB	BB	AB	BB	BB	BB	AB	BB	BB	AB	AB	BB	BB	BB	BB	BB	AB	AB	AB	BB	BB	BB	BB	BB	BB	AB		BB	NC	BB	BB	BB	BB	BB	NC	BB	NC	BB
293	AX-89819967	AA	BB	AB	AB	BB	AB	BB	AB	BB	AB	AB	AB	AB	BB	BB	BB	BB	BB	BB	BB	AB	AB	AB	AB	AB	BB	AB	BB	AB	AB	BB	NC	AB	AA	AA	BB		AA	BB	AA	AB	BB	AB	BB	AB	AA	AB	BB
294	AX-89819610	AB	BB	AB	AB	BB	AA	BB	AA	AB	AB	AA	AB	AB	AB	BB	BB	AB	BB	BB	AB	AA	AB	AB	BB	AB	BB	AA	AB	AB	AB	BB	BB	AB	AA	AA	AB		AA	AB	AA	AB	BB	AB	BB	AA	AA	AA	BB
295	AX-89781474	AA	AA	AA	AA	AB	AA	AB	AA	AB	AA	AB	AB	AB	AA	AB	AA	AB	AA	AA	AB	AA	AA	AB	AB	AA	AB	AB	BB	AB	AB	AB	AB	AB	AA	AA	AB		AA	AB	AA	AA	AB	AB	AB	AB	AA	AB	AB
296	AX-89820000	NC	BB	AB	AB	BB	NC	BB	AA	BB	NC	AB	AB	AB	AB	BB	BB	BB	BB	BB	BB	AB	AB	AB	BB	AB	BB	AB	BB	AB	AB	BB	BB	AB	AA	AA	BB		AA	BB	AA	AB	BB	AB	BB	AB	NC	AB	BB
297	AX-89806623	BB	AA	AB	BB	AA	BB	AA	BB	AA	BB	AB	AB	AB	BB	AA	AA	AA	AA	AA	AA	AB	AB	AB	AA	AB	AA	AB	AA	AB	AB	AA	AA	AB	BB	BB	AA		BB	AA	BB	AB	AA	AB	AA	AB	BB	AB	AA
298	AX-89877123	AB	BB	BB	AB	BB	AB	NC	AB	AB	AB	AB	BB	BB	BB	BB	BB	AB	BB	BB	AB	AB	BB	BB	BB	BB	BB	AB	AB	AB	BB	BB	BB	BB	AB	BB	AB		BB	NC	BB	BB	BB	BB	BB	NC	BB	NC	BB
299	AX-89877108	AB	BB	BB	AB	BB	AB	BB	AB	AB	AB	AB	BB	BB	AA	BB	BB	AB	BB	BB	AB	AB	BB	BB	BB	BB	BB	AB	AB	AB	BB	BB	BB	BB	AB	AA	AB		BB	NC	BB	BB	BB	BB	BB	NC	BB	NC	BB
300	AX-89820031	BB	BB	BB	BB	BB	BB	BB	BB	AB	BB	AB	BB	BB	BB	BB	BB	AB	BB	BB	AB	AB	BB	BB	BB	BB	BB	AB	AB	AB	BB	BB	BB	BB	BB	BB	AB		BB	NC	BB	BB	BB	BB	BB	NC	BB	NC	BB
301	AX-89819986	BB	BB	BB	BB	BB	BB	BB	AB	AB	BB	AA	BB	BB	BB	BB	BB	AB	BB	BB	AB	AB	BB	BB	BB	BB	BB	AB	AB	AA	BB	BB	BB	BB	BB	BB	AB		BB	NC	BB	BB	BB	BB	BB	NC	BB	NC	BB
302	AX-89819987	BB	BB	BB	AA	BB	AB	BB	AB	BB	AB	BB	BB	BB	AA	BB	BB	BB	BB	BB	BB	BB	BB	BB	BB	BB	BB	BB	BB	BB	NC	BB	BB	BB	AA	AA	BB		BB	BB	BB	BB	BB	BB	BB	BB	BB	BB	BB
303	AX-89781173	AA	AA	AA	AB	AA	AB	AA	AB	AA	AB	AA	AA	AB	AB	AA	AA	AA	AA	AA	AA	AA	AA	AA	AA	AA	AA	AA	AA	AA	NC	AA	AA	AA	BB	BB	AA		AA	AA	AA	AA	AA	AA	AA	AA	AA	AA	AA
304	AX-89781209	BB	AA	AB	BB	AA	BB	AA	AB	AA	BB	AB	AB	AB	BB	AA	AA	AA	AA	AA	AA	AB	AB	AB	AA	AB	AA	AB	AA	AA	AB	AA	AA	AB	BB	BB	AA		BB	AA	BB	AB	AA	AB	AA	AB	BB	AB	AA
305	AX-89820002	BB	AA	AB	BB	AA	BB	AA	BB	AA	BB	AB	AB	BB	BB	AA	AA	AA	AA	AA	AA	AB	AB	BB	AA	AB	AA	AB	AA	AB	NC	AA	AA	BB	BB	BB	AA		BB	AA	BB	AB	AA	AB	AA	AB	BB	AB	AA
306	AX-89819971	AB	BB	AB	AB	BB	AB	BB	AB	BB	BB	AB	AB	AB	AB	BB	BB	BB	BB	BB	BB	AB	AB	AB	BB	AB	BB	AB	BB	AB	AB	BB	BB	AB	BB	AA	BB		AA	BB	AA	AB	BB	AB	BB	AB	AA	AB	BB
307	AX-89819974	BB	BB	BB	BB	BB	BB	BB	BB	AB	BB	AB	BB	BB	BB	BB	BB	AB	BB	BB	AB	AB	BB	BB	BB	BB	BB	AB	AB	AB	BB	BB	BB	BB	BB	BB	AB		BB	NC	BB	BB	BB	BB	BB	NC	BB	NC	BB
308	AX-89819973	AA	AA	AA	AA	AA	AA	AA	AA	AB	AA	AB	AA	AA	AA	AA	AA	AB	AA	AA	AB	AB	AA	AA	AA	AA	AA	AB	AB	AB	AA	AA	AA	AA	AA	AA	AB		AA	NC	AA	AA	AA	AA	AA	NC	AA	NC	AA
309	AX-89781443	AA	AA	AB	AA	AA	AA	AA	AA	AA	AA	AB	AB	AB	AA	AA	AA	AA	AA	AA	AA	AB	AB	AB	AA	AB	AA	AB	AA	AB	AB	AA	AA	AB	AA	AA	AA		BB	AA	BB	AB	AA	AB	AA	AB	BB	AB	AA
310	AX-89819938	BB	BB	AB	BB	BB	BB	BB	BB	BB	BB	AB	AB	AB	BB	BB	BB	BB	BB	BB	BB	AB	AB	AB	BB	AB	BB	AB	BB	AB	AB	BB	BB	AB	BB	BB	BB		AA	BB	AA	AB	BB	AB	BB	AB	AA	AB	BB
311	AX-89819940	AA	BB	AB	AA	BB	AA	BB	AA	BB	AA	AB	AB	AB	AA	BB	BB	BB	BB	BB	BB	AB	AB	AB	BB	AB	BB	AB	BB	AB	AB	BB	BB	AB	AA	AA	BB		AA	BB	AA	AB	BB	AB	BB	AB	AA	AB	BB
312	AX-89781429	AA	BB	AB	BB	BB	AB	BB	AB	BB	AB	AB	AB	AB	BB	BB	BB	BB	BB	BB	BB	AB	AB	AB	BB	AB	BB	AB	BB	AB	NC	BB	BB	AB	BB	BB	BB		AB	BB	AB	AB	BB	AB	BB	AB	AB	AB	BB
313	AX-89819903	BB	AA	AB	BB	AA	BB	AA	BB	AA	BB	AB	AB	AB	BB	AA	AA	AA	AA	AA	AA	AB	AB	AB	AA	AB	AA	AB	AA	AB	AB	AA	AA	AB	BB	BB	AA		BB	AA	BB	AB	AB	AB	AA	AB	BB	AB	AA
314	AX-89904385	BB	BB	BB	BB	BB	AB	BB	NC	AB	AB	AB	BB	BB	BB	BB	BB	AB	BB	BB	AB	AB	BB	BB	BB	BB	BB	AB	AB	AB	NC	BB	BB	BB	BB	BB	AB		BB	NC	BB	BB	BB	BB	BB	NC	BB	NC	BB
315	AX-89819901	AA	AA	AA	AA	AA	AA	AA	AA	AB	AA	AB	AA	AA	AA	AA	AA	AB	AA	AA	AB	AB	AA	AA	AA	AA	AA	AB	AB	AB	AA	AA	AA	AA	AA	AA	AB		AA	NC	AA	AA	AA	AA	AA	NC	AA	NC	AA
316	AX-89781417	AA	AA	AB	AB	AA	AA	AA	AB	AA	AA	AB	AB	AB	AB	AA	AA	AA	AA	AA	AA	AB	AB	AB	AA	AB	AA	AB	AA	AB	AB	AA	AA	AB	AA	AA	AA		BB	AA	BB	AB	AB	AB	AA	AB	BB	AB	AA
317	AX-89851331	AA	BB	BB	AB	BB	AA	NC	BB	AB	AB	AB	BB	BB	BB	BB	BB	AB	BB	BB	AB	AB	BB	BB	BB	BB	BB	AB	AB	AB	NC	BB	BB	BB	AB	AB	AB		BB	NC	BB	BB	BB	BB	BB	NC	BB	NC	BB
318	AX-89819856	AA	BB	AB	AA	AB	AA	AB	AA	BB	AA	AB	AA	AA	AA	AB	BB	BB	BB	BB	BB	AB	AB	AA	AB	AB	AB	AB	AB	AB	AA	AB	AB	AA	AA	AA	BB		AA	NC	AA	AB	AB	AA	AB	AB	AA	AB	AB
319	AX-89847267	AB	BB	AB	BB	AB	AB	AB	BB	BB	AB	AB	AA	AA	BB	AB	BB	BB	BB	BB	BB	AB	AB	AA	AB	AB	AB	AB	AB	AB	AA	AB	AB	AA	AB	AB	BB		AA	NC	AA	AB	AB	AA	AB	AB	AA	AB	AB
320	AX-89781383	AA	BB	AB	AA	AB	AA	AB	AA	BB	AA	AB	AA	AA	AA	AB	BB	BB	BB	BB	BB	AB	AB	AA	AB	AB	AB	AB	AB	AB	AA	AB	AB	AA	AA	AA	BB		AA	NC	AA	AB	AB	AA	AB	AB	AA	AB	AB
321	AX-89803470	BB	BB	AB	AB	AB	BB	AB	BB	BB	AB	AB	AA	AA	AB	AB	BB	BB	BB	BB	BB	AB	AB	AA	AB	NC	AB	AB	AB	AB	AA	AB	AB	AA	BB	AB	BB		AA	NC	AA	AB	AB	AA	AB	AB	AA	AB	AB
322	AX-89819829	BB	AA	AB	BB	AA	AB	AA	AB	AB	BB	BB	AB	AB	BB	AA	AA	AB	AA	AA	AB	BB	AB	AB	AA	AB	AA	BB	AB	BB	AB	AA	AA	AB	AB	AA	AB		BB	AB	BB	AB	AB	AB	AA	BB	BB	BB	AA
323	AX-89819809	AB	BB	BB	AB	BB	AA	BB	AB	AB	AA	AB	BB	BB	AB	BB	BB	AB	BB	BB	AB	AB	BB	BB	BB	BB	BB	AB	AA	AB	BB	BB	BB	BB	AA	AA	AB		BB	NC	BB	BB	BB	BB	BB	NC	BB	NC	BB
324	AX-89781359	BB	AA	AA	BB	AA	BB	AA	BB	AB	BB	AB	AA	AA	BB	AA	AA	AB	AA	AA	AB	AB	AA	AA	AA	AA	AA	AB	AB	AB	AA	AA	AA	AA	BB	BB	AB		AA	NC	AA	AA	AA	AA	AA	NC	AA	NC	AA
325	AX-89819822	BB	BB	AB	AB	BB	BB	BB	AB	BB	BB	AB	AB	AB	AB	BB	BB	BB	BB	BB	BB	AB	AB	AB	NC	AB	BB	AB	BB	AB	AB	BB	BB	AB	BB	BB	BB		AA	BB	AA	AB	AB	AB	BB	AB	AA	AB	BB
326	AX-89803464	AB	BB	AB	AA	BB	AA	BB	AB	BB	AA	AB	AB	AB	AA	BB	BB	BB	BB	BB	BB	AB	AB	AB	BB	AB	BB	AB	BB	AB	AB	BB	BB	AB	AA	AA	BB		AA	BB	AA	AB	AB	AB	BB	AB	AA	AB	BB
327	AX-89862827	AA	AA	AB	AA	AA	AB	AA	AA	AA	AA	AB	AB	AB	AA	AA	AA	AA	AA	AA	AA	AB	AB	AB	AA	AB	AA	AB	AA	AB	AB	AA	AA	AB	AA	AA	AA		BB	AA	BB	AB	AB	AB	AA	AB	BB	AB	AA
328	AX-89819724	BB	AA	AA	BB	AA	BB	AA	BB	AB	BB	AB	AA	AA	BB	AA	AA	AB	AA	AA	AB	AB	AA	AA	AA	AA	AA	AB	AB	AB	AA	AA	AA	AA	BB	BB	AB		AA	NC	AA	AA	AA	AA	AA	NC	AA	NC	AA
329	AX-89781293	AA	AA	AA	AB	AA	AA	AA	BB	AB	AB	AB	AA	AA	BB	AA	AA	AB	AA	AA	AB	AB	AA	AA	AA	AA	AA	AB	AB	AB	NC	AA	AA	AA	AA	AA	AB		AA	NC	AA	AA	AA	AA	AA	NC	AA	NC	AA
330	AX-89781292	BB	AA	AB	BB	AA	BB	AA	AB	AA	BB	AB	AB	AB	BB	AA	AA	AA	AA	AA	AA	AB	AB	AB	AA	AB	AA	AB	AA	AB	AB	AA	AA	AB	BB	BB	AA		BB	AA	BB	AB	AB	AB	AA	AB	BB	AB	AA
331	AX-89819749	NC	AA	AB	BB	AA	BB	AA	BB	AA	BB	AB	AB	AB	BB	AA	AA	AA	AA	AA	AA	AB	AB	AB	AA	AB	AA	AB	AA	AB	AB	AA	AA	AB	BB	AB	AA		BB	AA	BB	AB	AB	AB	AA	AB	BB	AB	AA
332	AX-89876824	AB	AA	AA	AB	AA	BB	AA	AB	AB	AB	AB	AA	AA	AA	AA	AA	AB	AA	AA	AB	AB	AA	AA	AA	AA	AA	AB	AB	AB	AA	AA	AA	AA	AB	AA	AB		AA	NC	AA	AA	AA	AA	AA	NC	AA	NC	AA
333	AX-89819756	AA	BB	BB	AB	BB	AA	BB	AA	AB	AA	AB	BB	BB	AA	BB	BB	AB	BB	BB	AB	AB	BB	BB	BB	BB	BB	AB	AB	AB	NC	BB	BB	BB	AB	AB	AB		BB	NC	BB	BB	BB	BB	BB	NC	BB	NC	BB
334	AX-89819712	AA	AA	AA	AA	AB	AA	AB	AA	AB	AA	AB	AB	AB	AA	AB	AA	AB	AA	AA	AB	AB	AA	AB	AB	AA	AB	AB	BB	AB	AB	AB	AB	AB	AA	AA	AB		AA	AB	AA	AA	AA	AB	AB	AB	AA	AB	AB
335	AX-89781286	AB	AA	AA	AB	AA	AA	AA	AA	AA	AA	AA	AA	AA	AA	AA	AA	AA	AA	AA	AA	AA	AA	AA	AA	AA	AA	AA	AA	AA	NC	AA	AA	AA	AA	AA	AA		AA	AA	AA	AA	AA	AA	AA	AA	AA	AA	AA
336	AX-89806607	BB	AA	AB	BB	AA	AB	AA	AB	AA	BB	AB	AB	AB	BB	AA	AA	AA	AA	AA	AA	AB	AB	AB	AA	AB	AA	AB	AA	AB	NC	AA	AA	AB	AB	AB	AA		BB	AA	BB	AB	AB	AB	AA	AB	BB	AB	AA
337	AX-89862840	BB	AA	AA	BB	AB	AB	AA	BB	AA	BB	AA	AA	AB	BB	AB	AB	AB	AB	AB	AA	AA	AA	AA	AA	AA	AA	AA	AA	AA	AA	AA	AB	AA	BB	BB	AA		AA	AA	AA	AA	AA	AA	AA	AA	AA	AA	AA
338	AX-89877192	AB	AA	AA	AB	AB	AA	NC	AA	AA	AA	AA	AA	AA	AA	AB	AB	AB	AB	AB	AA	AA	AA	AA	NC	AA	AA	AA	AA	AA	NC	AA	AB	AA	AA	AA	AA		AA	AA	AA	AA	AA	AA	AA	AA	AA	AA	AA
339	AX-89819660	AA	BB	BB	AB	AB	AA	BB	AB	BB	AB	BB	BB	AB	AA	AB	AB	AB	AB	AB	BB	BB	BB	BB	BB	BB	BB	BB	BB	BB	NC	BB	AB	BB	AA	AA	BB		BB	BB	BB	BB	BB	BB	BB	BB	BB	BB	BB
340	AX-89781220	BB	BB	AB	BB	BB	BB	BB	BB	BB	BB	AB	AB	AB	BB	BB	BB	BB	BB	BB	BB	AB	AB	AB	BB	AB	BB	AB	BB	AB	AB	BB	BB	AB	BB	BB	BB		AA	BB	AA	AB	AB	AB	BB	AB	AA	AB	BB
341	AX-89781615	BB	AA	AA	AB	BB	AB	AB	BB	AA	BB	AB	BB	BB	NC	AB	AB	AA	AA	AB	AA	AB	AA	BB	AB	AB	AB	AB	AA	AB	BB	AB	BB	BB	AB	BB	AA		AB	NC	NC	AB	NC	NC	AB	NC	AB	AB	AB
342	AX-89781587	BB	AA	AB	AB	BB	BB	AB	AB	AA	BB	AB	BB	BB	AB	BB	AB	AB	AB	AB	AA	AB	AB	BB	AB	AB	AB	AB	AB	AB	BB	AB	BB	BB	BB	BB	AA		BB	NC	BB	AB	AB	BB	AB	AB	BB	AB	AB
343	AX-89781605	BB	BB	BB	BB	AB	BB	BB	BB	BB	BB	BB	BB	BB	BB	AB	AB	AB	NC	AB	BB	BB	BB	BB	BB	BB	BB	BB	BB	BB	BB	BB	AB	BB	BB	BB	BB		BB	BB	BB	BB	BB	BB	BB	BB	BB	BB	BB
344	AX-89820126	BB	AA	AB	AB	AA	AB	AA	BB	AA	BB	AB	AB	AB	AB	AA	AA	AA	AA	AA	AA	AB	AB	AB	AA	AB	AA	AB	AA	AB	AB	AA	AA	AB	BB	BB	AA		BB	AA	BB	AB	AB	AB	AA	AB	BB	AB	AA
345	AX-89877196	AB	BB	BB	BB	AB	AB	BB	BB	BB	AB	BB	BB	BB	AB	AB	AB	AB	AB	AB	BB	BB	BB	BB	BB	BB	BB	BB	BB	BB	NC	BB	AB	BB	AB	AB	BB		BB	BB	BB	BB	BB	BB	BB	BB	BB	BB	BB
346	AX-89872316	BB	AA	AA	AA	AB	BB	AA	AB	AA	AB	AA	AA	AA	BB	AB	AB	AB	AB	AB	AA	AA	AA	AA	AA	AA	NC	AA	AA	AA	AA	AA	AB	AA	BB	BB	AA		AA	AA	AA	AA	AA	AA	AA	AA	AA	AA	AA
347	AX-89877232	AB	AA	AA	AA	AB	AA	AA	AA	AA	AA	AA	AA	AA	AA	AB	AB	AB	AB	AB	AA	AA	AA	AA	AA	AA	AA	AA	AA	AA	AA	AA	AB	AA	AB	BB	AA		AA	AA	AA	AA	AA	AA	AA	AA	AA	AA	AA
348	AX-89781556	AA	BB	AB	AA	BB	AA	BB	AA	BB	AA	AB	AB	AB	AA	BB	BB	BB	AB	BB	BB	AB	AB	AB	BB	AB	BB	AB	BB	AB	AB	BB	NC	AB	AA	AA	BB		AA	BB	AA	AB	AB	AB	BB	AB	AA	AB	BB
349	AX-89820069	AB	BB	AB	AB	BB	AB	BB	AB	BB	AB	AB	AB	AB	BB	BB	BB	BB	AB	BB	BB	AB	AB	AB	BB	AB	BB	AB	BB	AB	AB	BB	BB	AB	AB	BB	BB		AB	BB	AB	AB	AB	AB	BB	AB	AB	AB	BB
350	AX-89820066	AA	BB	AB	AA	BB	AA	BB	AB	BB	AA	AB	AB	AB	AA	BB	BB	BB	AB	BB	BB	AB	AB	AB	BB	AB	BB	AB	BB	AB	AB	BB	BB	AB	AA	AA	BB		AA	BB	AA	AB	AB	AB	BB	AB	AA	AB	BB
351	AX-89877186	AB	BB	BB	AB	AB	AB	BB	AB	BB	AB	BB	BB	BB	BB	AB	AB	AB	AB	AB	BB	BB	BB	BB	BB	BB	BB	BB	BB	BB	BB	BB	AB	BB	AB	BB	BB		BB	BB	BB	BB	BB	BB	BB	BB	BB	BB	BB
352	AX-89820068	BB	BB	AB	BB	BB	BB	BB	BB	BB	BB	AB	AB	AB	BB	BB	BB	BB	AB	BB	BB	AB	AB	AB	BB	AB	BB	AB	BB	AB	AB	BB	BB	AB	BB	BB	BB		AA	BB	AA	AB	AB	AB	BB	AB	NC	AB	BB
353	AX-89904397	AB	BB	AB	AB	AB	AB	BB	AB	BB	AA	AB	AB	AB	AB	AB	AB	AB	AA	AB	BB	AB	AB	AB	BB	AB	BB	AB	BB	AB	AB	BB	AB	AB	AB	BB	BB		AA	BB	AA	AB	AB	AB	BB	AB	AA	AB	BB
354	AX-89820196	AA	AA	AB	AA	AB	AA	AA	AA	AA	AA	AB	BB	AB	BB	AB	AB	AB	AB	AB	AA	AA	AB	AA	AA	AB	AA	AB	AA	AB	AA	AA	AB	AA	AA	AA	AA		BB	NC	BB	AB	AB	BB	NC	AB	BB	AB	AB
355	AX-89847304	AA	AA	AA	AB	BB	AB	AA	AB	AA	AB	AB	BB	BB	AA	BB	AB	AB	AB	AB	AA	AA	AB	AA	AA	AB	AA	AB	AA	AB	AA	AA	BB	AA	AA	AB	AA		AB	NC	NC	AB	AB	AB	NC	NC	AB	NC	AB
356	AX-89847303	AB	AA	AA	BB	AB	AB	AA	BB	AA	AB	AB	BB	AB	BB	AB	AB	AB	AB	AB	AA	AA	AB	AA	AA	AB	AA	AB	AA	AB	AA	AA	AB	AA	AB	AB	AA		AB	NC	NC	AB	AB	AB	NC	NC	AB	NC	AB
357	AX-89815321	BB	AA	AB	AB	BB	AB	AB	AA	AA	BB	AB	BB	BB	AB	BB	AB	AB	AB	AB	AA	AA	AB	AB	AB	AB	AB	AB	AB	AB	AB	AB	BB	AB	AB	BB	AA		BB	NC	BB	AB	AB	BB	AB	AB	BB	AB	AB
358	AX-89904418	BB	AA	AA	BB	BB	BB	AB	BB	AA	BB	AB	BB	BB	BB	BB	AB	AB	AB	AB	AA	AB	AB	AB	AB	AB	AB	AB	AB	AB	AB	AB	BB	AB	BB	BB	AA		AB	NC	NC	AB	AB	AB	AB	NC	AB	NC	AB
359	AX-89806640	BB	AA	AA	AB	AB	BB	AA	AB	AA	AB	AB	BB	AB	BB	AB	AB	AB	AB	AB	AA	AA	AB	AB	AA	AB	AA	AB	AA	AB	AA	AA	AB	AA	BB	BB	AA		AB	NC	NC	AB	AB	AB	NC	NC	AB	NC	AB
360	AX-89781741	AB	AA	AA	BB	AB	AB	AA	BB	AA	AB	AB	AB	AB	BB	AB	AB	AB	AB	AB	AA	AA	AB	AA	AA	AB	AA	AB	AA	AB	AA	AA	AB	AA	BB	BB	AA		AB	AA	NC	AB	AB	AB	AA	AA	AB	AA	AB
361	AX-89820278	AA	BB	BB	NC	AA	AA	AB	AB	BB	AA	BB	AA	AA	AB	AB	AB	AB	AB	AB	AB	BB	AB	AB	AB	AB	AB	AB	AB	BB	AB	AB	AA	BB	AA	AA	AB		AB	NC	NC	AB	AB	AB	AB	NC	AB	NC	AB
362	AX-89820153	AA	AA	AB	AA	BB	AA	AB	AA	AA	AA	AB	BB	BB	AA	BB	AB	AB	AB	AB	AA	AA	AB	AB	AB	AB	AB	AB	AB	AB	AB	AB	BB	AB	AA	AA	AA		BB	NC	BB	AB	AB	BB	AB	AB	BB	AB	AB
363	AX-89847314	AB	AA	AA	BB	BB	AB	AB	BB	AA	AB	AA	AA	AB	AB	BB	AB	AB	AB	AB	AA	AA	AA	AA	AB	AA	AB	AA	AB	AA	AB	AB	BB	AB	AB	AA	AA		AA	AA	AA	AA	AA	AA	NC	AA	AA	AA	AA
364	AX-89781753	AB	AA	AA	AA	AB	AB	AA	AA	AA	AB	AA	AA	AB	AA	AA	AA	AA	AA	AA	AA	AA	AA	AA	AB	AA	AB	AA	AB	AA	AB	AA	AB	AA	AA	AA	AA		AA	AA	AA	AA	AA	AA	NC	AA	AA	AA	AA
365	AX-89820329	AB	AA	AA	BB	BB	BB	AB	AB	AA	BB	AA	AA	AB	BB	BB	AB	AB	AB	AB	AA	AA	AA	AA	AB	AA	AB	AA	AB	AA	AB	AB	BB	AB	AB	AB	AA		AA	AA	AA	AA	AA	AA	NC	AA	AA	AA	AA
366	AX-89781387	AA	BB	AB	AB	AB	AA	AB	AB	AB	AA	AB	AB	AA	AB	AB	AB	BB	BB	AB	BB	BB	AB	AB	BB	BB	AB	BB	BB	BB	AB	AB	AA	AB	AA	AA	AB		AB	AB	AB	AB	BB	AB	BB	BB	AA	AB	BB
367	AX-89819865	BB	BB	AB	BB	AB	BB	AB	BB	AB	BB	AB	AB	AA	BB	AB	AB	BB	BB	AB	BB	BB	AB	AB	BB	BB	AB	BB	BB	BB	AB	AB	AB	AB	BB	BB	AB		AB	AB	AB	AB	BB	AB	BB	BB	AA	AB	BB
368	AX-89876996	AA	AB	NC	AB	NC	BB	AB	AB	AA	NC	AA	AA	BB	BB	AA	AA	BB	AB	AA	AB	AB	AA	AA	AB	AB	AA	AB	AB	AB	NC	AB	AA	AA	BB	BB	AA		AB	AB	AB	AB	NC	AB	NC	NC	AA	AB	NC
369	AX-89781380	AA	AA	AA	AA	AB	AA	AB	AA	AB	AA	AA	AB	BB	AA	AA	AB	AB	AA	AB	AA	AA	AB	AB	AA	AA	AB	AA	AA	AA	AB	AB	BB	AA	AA	AA	AB		AB	AB	AB	AB	AA	AB	AA	AA	NC	AB	AA
370	AX-89781401	AA	BB	AA	AB	AB	AA	AB	AB	AB	AA	AA	AB	NC	AB	AA	AB	BB	BB	AB	BB	BB	AB	AB	BB	BB	AB	BB	BB	AB	AB	AB	AB	AA	AA	AA	AB		AB	AB	AB	AB	NC	AB	NC	NC	AA	AB	NC
371	AX-89819858	BB	BB	AB	BB	AB	BB	AB	BB	AB	BB	AB	AB	BB	BB	AB	AB	BB	BB	AB	BB	BB	AB	AB	BB	BB	AB	BB	BB	BB	AB	AB	AB	AB	BB	BB	AB		AB	AB	AB	AB	BB	AB	BB	BB	AA	AB	BB
372	AX-89819839	AA	AA	AB	AA	AB	AA	AB	AA	AB	AA	AB	AB	BB	AA	AB	AB	AB	AA	AB	AA	AA	AB	AB	AA	AA	AB	AA	AA	AA	AB	AB	AB	AB	AA	AA	AB		AB	AB	AB	AB	AA	AB	AA	AA	BB	AB	AA
373	AX-89781374	BB	BB	AB	AB	AB	AB	AB	BB	AB	BB	AB	AB	BB	NC	AB	AB	BB	BB	AB	BB	BB	AB	AB	BB	BB	AB	BB	BB	BB	AB	AB	AB	AB	AB	BB	AB		AB	AB	AB	AB	BB	AB	BB	BB	AA	AB	BB
374	AX-89847257	BB	AA	AB	AB	AB	AB	AB	AB	AB	AB	AB	AB	BB	BB	AB	AB	AA	AA	AB	AA	AA	AB	AB	AA	AA	AB	AA	AA	AA	AB	AB	AB	BB	BB	BB	AB		AB	AB	AB	AB	AA	AB	AA	AA	BB	AB	AA
375	AX-89904380	BB	AA	AB	BB	AB	AB	AB	AB	AB	BB	AB	AB	AB	AB	AB	AB	AA	AA	AB	AA	AA	AB	AB	AA	AA	AB	AA	AA	AA	AB	AB	BB	BB	AB	AA	AB		AB	AB	AB	AB	AA	AB	AA	AA	BB	AB	AA
376	AX-89847259	AB	BB	AB	BB	AB	BB	AB	AB	AB	BB	AB	AB	AA	AB	AB	AB	AB	BB	AB	BB	BB	AB	AB	BB	BB	AB	BB	BB	BB	AB	AB	AA	AA	AB	BB	AB		AB	AB	AB	AB	BB	AB	BB	BB	AA	AB	BB
377	AX-89781312	AA	BB	AB	AA	AB	AA	AB	AA	AB	AA	AB	AB	AA	NC	AB	AB	BB	BB	AB	BB	BB	AB	AB	BB	BB	AB	BB	BB	BB	AB	AB	AA	AA	AA	AA	AB		AB	AB	AB	AB	BB	AB	BB	BB	AA	AB	BB
378	AX-89781306	BB	AA	AB	BB	AB	BB	AB	BB	AB	BB	AB	AB	BB	BB	AB	AB	AB	AA	AB	AA	AA	AB	AB	AA	AA	AA	AA	AA	AA	AB	AB	BB	BB	BB	BB	AB		AB	AB	AB	AB	AA	AB	AA	AA	BB	AB	AA
379	AX-89847260	AB	BB	AB	AB	AB	AB	AB	BB	AB	NC	AB	AB	AA	BB	AB	AB	AB	BB	AB	BB	BB	AB	AB	BB	BB	AB	BB	BB	BB	AB	AB	AA	AA	AB	AB	AB		AB	AB	AB	AB	BB	AB	BB	BB	AA	AB	BB
380	AX-89847256	AA	AA	AB	AB	AB	AA	AB	AB	AB	AA	AB	AB	BB	AA	AB	AB	AB	AA	AB	AA	AA	AB	AB	AA	AA	AB	AA	AA	AA	AB	AB	BB	BB	AA	AA	AB		AB	AB	AB	AB	AA	AB	AA	AA	BB	AB	AA
381	AX-89819783	BB	BB	AB	BB	AB	BB	AB	BB	AB	BB	AB	AB	BB	BB	AB	AB	BB	BB	AB	BB	BB	AB	AB	BB	BB	AB	BB	BB	BB	AB	AB	AB	AA	BB	BB	AB		AB	AB	AB	AB	BB	AB	BB	BB	AA	AB	BB
382	AX-89819781	BB	BB	AB	AB	AB	BB	AA	AB	AB	BB	AB	AB	BB	AB	AB	AB	BB	BB	AB	BB	BB	AB	AB	BB	BB	AB	BB	BB	BB	AB	AB	AB	AA	BB	BB	AB		AB	AB	AB	AB	BB	AB	BB	BB	AA	AB	BB
383	AX-89820186	AA	AA	AB	AA	AA	AA	AA	BB	AB	AA	AB	AA	AA	AA	AB	AA	AA	AB	AB	AA	AA	AB	AB	AA	AA	AA	AA	AA	AA	AB	AB	AB	AB	AA	AA	AB		AA	AB	AB	AB	AA	AB	AA	AA	AB	AB	AA
384	AX-89819790	AA	AA	AB	AA	AB	AA	AA	AA	AB	AA	AB	AB	AA	AA	AB	AB	AA	AA	AB	AA	AA	AB	AB	AA	AA	AB	AA	AA	AA	AB	AA	AB	BB	AA	AA	AB		AB	AB	AB	AB	AA	AB	AA	AA	BB	AB	AA
385	AX-89781693	BB	AA	AB	AA	AA	AB	AA	AB	AB	BB	AB	AA	AA	NC	AB	AA	AA	AB	AB	AA	AA	AB	AB	AA	AA	AA	AA	AA	AA	AB	AB	AB	AB	AA	AB	AB		AA	AB	AB	AB	AA	AB	AA	AA	AB	AB	AA
386	AX-89819726	BB	AA	AB	BB	AB	AB	AB	AB	AB	BB	AB	AB	AB	BB	AB	AB	AA	AB	AB	AA	AA	AB	AB	AA	AA	AB	AA	AA	AA	AB	AB	AB	BB	AB	AA	AB		AB	AB	AB	AB	AA	AB	AA	AA	BB	AB	AA
387	AX-89819738	AB	NC	AB	AA	AB	AA	AA	AA	BB	AA	AB	BB	AB	AA	AB	BB	AA	BB	BB	AB	AB	BB	BB	AB	AB	BB	AB	AB	AA	BB	AA	BB	BB	AB	AB	BB		AB	AB	AB	AB	NC	AB	NC	NC	BB	AB	NC
388	AX-89781279	BB	BB	AB	BB	AB	BB	AA	BB	AB	NC	AB	AB	AA	BB	AB	AB	AA	AB	AB	BB	BB	AB	AB	NC	BB	AB	BB	BB	BB	AB	AA	AA	AA	BB	BB	AB		AB	AB	AB	AB	BB	AB	BB	BB	AA	AB	BB
389	AX-89904371	BB	AA	AB	BB	AB	AB	AB	BB	AB	BB	AB	AB	BB	AB	AB	AB	AB	AB	AB	AA	AA	AB	AB	AA	AA	AB	AA	AA	AA	AB	AB	AB	BB	AB	NC	AB		AB	AB	AB	AB	AA	AB	AA	AA	BB	AB	AA
390	AX-89876838	AA	BB	AB	AA	AB	AA	AB	AA	AB	AA	AB	AB	AB	AA	AB	AB	BB	AB	AB	BB	BB	AB	AB	BB	BB	AB	BB	BB	BB	AB	AB	AB	AA	AA	AA	AB		AB	AB	AB	AB	BB	AB	BB	BB	AA	AB	BB
391	AX-89819696	AB	BB	AB	BB	AB	BB	AB	BB	AB	BB	AB	AB	AB	BB	AB	AB	BB	AB	AB	BB	BB	AB	AB	BB	BB	AB	BB	BB	BB	AB	AB	AB	AA	AB	AB	AB		BB	AB	AA	AB	BB	AB	BB	BB	AA	AB	BB
392	AX-89819714	BB	BB	AB	BB	AB	BB	AB	BB	AB	BB	AB	BB	AB	BB	AB	AB	BB	AB	AB	BB	BB	AB	AB	BB	BB	BB	BB	BB	BB	AB	AB	AB	AA	BB	BB	AB		BB	AB	AB	AB	BB	AB	BB	BB	AB	AB	BB
393	AX-89819698	BB	BB	AB	BB	AB	BB	AB	BB	AB	BB	AB	BB	AB	BB	AB	AB	AB	AB	AB	BB	BB	AB	AB	BB	BB	BB	BB	BB	BB	AB	AB	AB	AA	BB	BB	AB		BB	AB	AB	AB	BB	AB	BB	BB	AB	AB	BB
394	AX-89781596	BB	BB	AB	BB	AB	BB	BB	BB	AB	BB	AB	AB	AA	BB	AB	AB	BB	AB	AB	BB	NC	AB	AB	BB	AB	AB	BB	BB	BB	AB	BB	AA	AA	BB	BB	AB		BB	AB	AA	BB	BB	AB	BB	BB	AA	AB	BB
395	AX-89847248	AB	AA	AB	BB	AB	BB	AB	BB	AB	NC	AB	AB	BB	BB	AB	AB	NC	AB	AB	AA	AA	AB	AB	AA	AA	AB	AA	AA	AA	AB	AB	BB	BB	AB	BB	AB		AA	AB	BB	AB	AA	AB	AA	AA	BB	AB	AA
396	AX-89847284	AB	AA	AB	BB	AB	BB	AB	BB	AB	BB	AB	AB	BB	AB	AB	AB	AB	AB	AB	AA	AA	AB	AB	AA	AA	AB	AA	AA	AA	AB	AB	BB	BB	AB	BB	AB		AA	AB	BB	AB	AA	AB	AA	AA	BB	AB	AA
397	AX-89781559	AB	BB	AB	AB	AB	BB	AB	AB	AB	AB	AB	AB	AA	BB	AB	AB	BB	AB	BB	BB	BB	AB	AB	BB	BB	AB	BB	BB	BB	NC	AB	NC	AA	BB	BB	AB		BB	AB	AA	AB	BB	AB	BB	BB	AA	AB	BB
398	AX-89820079	AA	BB	AB	AA	AB	AA	AB	AB	AB	AA	AB	AB	AA	AA	AB	AB	AB	AB	AB	BB	BB	AB	AB	BB	BB	AB	BB	BB	BB	AB	AB	AA	AA	AA	AA	AB		BB	AB	AA	AB	BB	AB	BB	BB	AA	AB	BB
399	AX-89877163	AB	AA	AB	AB	AB	AB	AB	AB	AB	AB	AB	AB	BB	AA	AB	AB	AA	AB	AB	AA	AA	AB	AB	AA	AA	AB	AA	AA	AA	AB	AB	AB	BB	AB	AA	AB		AA	AB	BB	AB	AA	AB	AA	AA	BB	AB	AA
400	AX-89781656	BB	BB	AB	BB	AB	BB	AB	BB	AB	BB	AA	AA	NC	BB	AB	AB	BB	AB	AB	BB	BB	AB	AA	AB	AB	AB	AB	AB	BB	NC	AB	AA	AA	BB	BB	AB		AB	AB	AA	AA	AB	AA	NC	NC	AA	AB	AB
401	AX-89904405	AA	BB	AB	AA	AB	AA	AB	AA	AB	AA	AA	AA	AA	AA	AB	AB	AB	AB	AB	BB	BB	AB	AA	BB	AB	AB	AB	AB	BB	AA	AB	AA	AA	AA	AA	AB		AB	AB	AA	AA	AB	AA	NC	NC	AA	AB	AB
402	AX-89847295	AA	AA	AB	BB	AB	AB	AB	AB	AB	AA	BB	BB	BB	AB	AB	AB	AB	AB	AB	AA	AA	AB	BB	AB	AB	AB	AB	AB	AA	BB	AB	BB	BB	AB	AA	AB		AB	AB	BB	BB	AB	BB	NC	NC	BB	AB	AB
403	AX-89847282	AB	AA	AB	AA	AB	AA	NC	AA	AB	AA	AB	AB	BB	AB	AB	AB	AB	AB	AB	AA	AA	AB	AB	AA	AA	AB	AA	AA	AA	AB	AB	BB	BB	AB	AA	AB		AA	AB	BB	AB	AA	AB	AA	AA	BB	AB	AA
404	AX-89781641	BB	AB	AA	AB	AA	AB	AA	AB	AB	BB	AA	AA	AA	AB	AA	AB	AA	AB	AB	BB	AB	AA	AA	AB	AB	AB	AB	AB	AB	AA	AA	AA	AA	BB	AB	AB		NC	NC	AA	AA	NC	AA	NC	NC	AA	NC	NC
405	AX-89781646	BB	BB	AB	BB	AB	BB	AB	BB	AB	BB	AB	AB	AA	BB	AB	AB	BB	AB	AB	NC	BB	AB	AB	BB	BB	AB	BB	BB	BB	AB	AB	AB	AA	BB	BB	AB		BB	AB	AA	AB	BB	AB	BB	BB	AA	AB	BB
406	AX-89820175	BB	BB	AB	BB	AB	BB	AB	BB	AB	BB	AA	AA	AA	BB	AB	AB	AB	AB	AB	BB	BB	AB	AA	AB	AB	AB	AB	AB	BB	AA	AB	AA	AA	BB	BB	AB		AB	AB	AA	AA	AB	AA	NC	NC	AA	AB	AB
407	AX-89781539	BB	BB	AB	AB	AB	BB	AB	AB	AB	BB	AB	AB	AA	AB	AB	AB	BB	AB	AB	BB	BB	AB	AB	AB	BB	AB	BB	BB	BB	AB	AB	AB	AA	AA	AB	AB		BB	AB	AA	AB	BB	AB	BB	BB	AA	AB	BB
408	AX-89820051	AB	AA	BB	AB	AB	AB	AB	AB	AB	AB	BB	AB	BB	AA	BB	AB	AA	AB	AB	AA	AA	AB	AB	AA	AA	AB	AA	AA	AB	AB	AB	AB	BB	AB	AA	AB		NC	AB	BB	AB	NC	AB	NC	NC	BB	AB	NC
409	AX-89820166	BB	AA	AB	BB	AB	BB	NC	BB	AB	BB	BB	BB	BB	BB	AB	AB	AB	AB	AB	AA	AA	AB	BB	AB	AB	AB	AB	AB	AA	BB	AB	BB	BB	BB	BB	AB		AB	AB	BB	BB	AB	BB	NC	NC	BB	AB	AB
410	AX-89781662	AA	BB	AB	AA	AB	AA	AB	AA	AB	AA	AA	AA	NC	AA	AB	AB	AB	AB	AB	BB	BB	AB	AA	AB	AB	AB	AB	AB	BB	AA	AB	AA	AA	AA	AA	AB		AB	AB	AA	AA	AB	AA	NC	NC	AA	AB	AB
411	AX-89820044	BB	BB	BB	BB	AB	BB	AB	BB	AB	BB	AB	AA	AA	BB	NC	AB	AB	AB	AB	NC	BB	AB	AA	AB	AB	AB	AB	AB	BB	AA	AB	AA	AB	BB	BB	AB		AB	AB	NC	NC	AB	NC	NC	NC	NC	AB	AB
412	AX-89820194	BB	BB	AB	BB	AB	BB	AB	BB	AB	BB	AA	AA	AA	BB	AB	AB	AB	AB	AB	NC	BB	AB	AA	AB	AB	AB	AB	AB	BB	AA	AB	AA	AA	BB	BB	AB		AB	AB	AA	AA	AB	AA	NC	NC	AA	AB	AB
413	AX-89820142	BB	BB	AB	AB	AB	AB	AB	BB	AB	AB	AA	AA	AA	AB	AB	AB	AB	AB	AB	BB	BB	AB	AA	NC	AB	AB	AB	AB	BB	AA	AB	AA	AA	BB	BB	AB		AB	AB	AA	AA	AB	AA	NC	NC	AA	AB	AB
414	AX-89820178	BB	BB	AB	BB	AB	BB	AB	BB	AB	BB	AA	AA	AA	BB	AB	AB	AB	AB	AB	BB	BB	AB	AA	AB	AB	AB	AB	AB	NC	AA	AB	AA	AA	BB	BB	AB		AB	AB	AA	AA	AB	AA	NC	NC	AA	AB	AB
415	AX-89781531	BB	AA	AB	AB	AB	AB	AB	BB	AB	BB	BB	BB	BB	NC	AB	AB	AB	AB	AB	AA	AA	AB	BB	AB	AB	AB	AB	AB	NC	BB	AB	BB	BB	AB	BB	AB		AB	AB	BB	BB	AB	BB	NC	NC	BB	AB	AB
416	AX-89867615	BB	BB	AB	AA	AB	AA	AB	AA	AB	AA	AB	AB	AA	AB	AB	AB	AB	AB	AB	BB	BB	AB	AB	BB	BB	AB	BB	BB	BB	AB	AB	AB	AA	AA	AA	AB		BB	AB	AA	AB	BB	AB	BB	BB	AA	AB	BB
417	AX-89820220	BB	AA	AB	BB	AB	BB	AB	BB	AB	BB	BB	BB	BB	BB	AB	AB	AB	AB	AB	AA	AA	AB	BB	AB	AB	AB	AB	AB	NC	BB	AB	BB	BB	BB	BB	AB		AB	AB	BB	BB	AB	BB	NC	NC	BB	AB	AB
418	AX-89781677	AA	AA	AB	AB	AB	AB	AB	AA	AB	AA	BB	BB	BB	AB	AB	AB	AB	AB	AB	AA	AA	AB	BB	NC	AB	AB	AB	AB	AA	BB	AB	BB	BB	AA	BB	AB		AB	AB	BB	BB	AB	BB	NC	NC	BB	AB	AB
419	AX-89781684	AB	AA	AB	BB	AA	BB	AA	BB	AB	NC	AB	AA	AA	BB	AB	AA	AA	AB	AB	AA	AA	AB	AB	AA	AA	AA	AA	AA	AA	AB	AA	AB	AB	BB	BB	AB		AA	AB	AB	AB	AA	AB	AA	AA	AB	AB	AA
420	AX-89781695	AA	BB	AB	AB	AB	AB	AB	AA	AB	AA	AA	AA	AA	NC	AB	AB	AB	AB	AB	BB	BB	AB	AA	AB	AB	AB	AB	AB	BB	AA	AB	AA	AA	AB	AA	AB		AB	AB	AA	AA	AB	AA	NC	NC	AA	AB	AB
421	AX-89904414	BB	AA	AB	BB	AA	BB	AB	BB	AB	BB	BB	BB	BB	BB	AB	AB	AA	AB	AB	AA	AA	AB	BB	AA	AA	AB	AA	AA	AA	BB	AB	BB	BB	BB	BB	AB		NC	AB	BB	BB	NC	BB	NC	NC	BB	AB	NC
422	AX-89867638	AB	AA	AB	BB	AA	BB	AA	BB	AB	BB	AB	AA	AB	BB	AB	AA	AA	AB	AB	AA	AA	AB	AB	AA	AA	AA	AA	AA	AA	AB	AB	AB	AB	BB	BB	AB		AA	AB	AB	AB	AA	AB	AA	AA	AB	AB	AA
423	AX-89877347	BB	BB	AB	AB	AB	AB	AB	AB	AB	AB	AA	AA	AA	AA	AB	AB	AB	AB	AB	BB	BB	AB	AA	NC	AB	AB	AB	AB	BB	AA	AB	AA	AA	BB	BB	AB		AB	AB	AA	AA	AB	AA	NC	NC	AA	AB	AB
424	AX-89820242	BB	AA	AB	BB	AB	BB	AB	BB	AB	BB	BB	BB	BB	BB	AB	AB	AB	BB	AB	NC	AA	AB	BB	AB	AB	AB	AB	AB	AA	BB	AB	BB	BB	BB	BB	AB		AB	AB	BB	BB	AB	BB	NC	NC	BB	AB	AB
425	AX-89781714	BB	AA	AB	BB	AB	BB	AB	AB	AB	BB	BB	BB	BB	BB	AB	AB	AB	AB	AB	AA	AA	AB	BB	AB	AB	AB	AB	AB	AA	BB	AB	BB	BB	BB	BB	AB		AB	AB	BB	BB	AB	BB	NC	NC	BB	AB	AB
426	AX-89781700	BB	BB	AB	BB	AB	BB	AB	AB	AB	BB	AA	AA	AA	BB	AB	AB	AB	AB	AB	AB	BB	AB	AA	AB	AB	AB	AB	AB	NC	AA	AB	AA	AA	BB	BB	AB		AB	AB	AA	AA	AB	AA	NC	NC	AA	AB	AB
427	AX-89781712	BB	BB	AB	BB	BB	BB	AB	AB	AB	BB	AB	AB	AA	BB	AB	AB	BB	AB	AB	BB	BB	AB	AB	BB	BB	AB	BB	BB	BB	AB	AB	AB	AB	BB	BB	AB		BB	AB	AA	AB	BB	AA	BB	BB	AA	NC	BB
428	AX-89820241	AB	BB	AB	AA	AB	AA	AB	AA	AB	AA	AA	AA	AA	AA	AB	AB	AB	AB	AB	BB	BB	AB	AA	NC	AB	AB	AB	AB	BB	AA	AB	AA	AA	AB	AB	AB		AB	AB	AA	AA	AB	AA	NC	NC	AA	AB	AB
429	AX-89781728	AB	BB	AB	BB	BB	AB	BB	BB	AB	AB	AB	BB	AB	BB	AB	BB	BB	AB	AB	BB	BB	AB	AB	BB	BB	BB	BB	BB	BB	AB	AB	AB	AB	BB	BB	AB		BB	AB	AB	AB	BB	AB	BB	BB	AB	AB	BB
430	AX-89877398	BB	AA	AB	BB	AB	AB	AB	BB	AB	BB	BB	BB	BB	BB	AB	AB	AB	AB	AB	AA	AA	AB	BB	AA	AB	NC	AB	AB	AA	BB	AB	BB	BB	AB	AB	AB		AB	AB	BB	BB	AB	BB	NC	NC	BB	AB	AB
431	AX-89820277	AB	NC	AB	BB	AB	AB	AB	BB	AA	BB	BB	AB	AB	BB	AB	AA	AB	NC	AA	AA	AA	AB	AB	AA	AA	AA	AA	AA	AB	AB	AB	NC	BB	AB	AB	AA		AB	AB	BB	BB	AB	BB	AA	AA	BB	AB	AB
432	AX-89820327	BB	AA	AB	AB	AB	AB	AB	AB	AA	BB	BB	AB	AB	AA	AB	AA	AB	AB	AA	AA	AA	AB	AB	AA	AA	AA	AA	AB	AB	AB	AB	AB	BB	BB	BB	AA		AB	AB	BB	BB	AB	BB	AA	AA	BB	AB	AB
433	AX-89820316	BB	AA	AB	BB	AB	BB	AB	BB	AB	BB	BB	BB	AB	BB	AB	AB	AB	BB	AB	AA	AA	AB	BB	AB	AB	AB	AB	BB	AA	BB	AB	BB	BB	BB	BB	AB		AB	AB	BB	BB	AB	BB	NC	NC	BB	AB	AB
434	AX-89781765	AB	AA	AB	AB	AB	AB	AB	AB	AB	BB	BB	BB	BB	AB	NC	AB	AB	BB	AB	AA	AA	AB	BB	AB	AB	AB	AB	BB	AA	BB	AB	AB	BB	BB	AA	AB		AB	AB	BB	BB	AB	BB	NC	NC	BB	AB	AB
435	AX-89781999	AB	AA	AB	AB	AB	AA	AB	AA	AB	BB	BB	BB	BB	AB	AB	AB	AB	BB	AB	AA	AA	AB	BB	AB	AB	AB	AB	BB	AA	BB	AB	BB	BB	AB	AA	AB		AB	AB	BB	BB	AB	BB	NC	NC	BB	AB	AB
436	AX-89877816	AB	BB	AB	BB	BB	BB	BB	AB	AB	BB	AB	BB	AA	BB	AB	AB	BB	AB	BB	BB	BB	AB	AB	BB	BB	BB	BB	BB	BB	AB	AB	NC	AA	BB	AB	AB		BB	AB	BB	AB	BB	AB	BB	BB	AB	AB	BB
437	AX-89782096	AA	BB	AB	AA	AB	AA	AB	AA	AB	AA	AA	AA	AA	AA	AB	AB	AB	AA	AB	AB	BB	AB	AA	AB	AB	AB	AB	AA	BB	AA	AB	AA	AA	AA	AA	AB		AB	AB	AA	AA	AB	AA	NC	NC	AA	AB	AB
438	AX-89820590	AB	BB	AB	BB	AB	AB	AB	AB	AB	BB	AA	AA	AA	BB	AB	AB	AB	AA	AB	BB	BB	AB	AA	AB	AB	AB	AB	AA	BB	AA	AB	AA	AA	BB	BB	AB		AB	AB	AA	AA	AB	AA	NC	NC	AA	AB	AB
439	AX-89820594	AB	AA	AB	BB	AB	AB	AB	AB	AB	BB	BB	BB	BB	BB	AB	AB	AB	AB	AB	AA	AA	AB	BB	AB	AB	AB	AB	BB	AA	BB	AB	BB	BB	BB	BB	AB		AB	AB	BB	BB	AB	BB	NC	NC	BB	AB	AB
440	AX-89820566	BB	AA	AB	BB	AA	BB	AA	BB	AB	BB	AB	AA	BB	NC	AB	AB	AA	AB	AA	AA	AA	AB	AB	AA	AA	AA	AA	AA	AA	AB	AB	AB	BB	BB	BB	AB		AA	AB	AA	AB	AA	AB	AA	AA	AB	AB	AA
441	AX-89782078	BB	NC	AB	BB	AB	BB	AB	BB	AB	BB	BB	BB	BB	NC	AB	AB	AB	AB	AB	AA	AA	AB	BB	AB	AB	AB	AB	BB	AA	BB	AB	BB	BB	BB	BB	AB		AB	AB	BB	BB	AB	BB	NC	NC	BB	AB	AB
442	AX-89782015	AB	AA	AB	AA	AB	AA	AB	NC	AB	AA	BB	BB	BB	NC	AB	AB	AB	BB	AB	AB	AA	AB	BB	AB	AB	AB	AB	BB	AA	BB	AB	BB	BB	AA	AA	AB		AB	AB	BB	BB	AB	BB	NC	NC	BB	AB	AB
443	AX-89782087	AA	BB	AB	BB	AB	AB	AB	BB	AB	AB	AA	AA	AA	NC	AB	AB	AB	AA	AB	BB	BB	AB	AA	AB	AB	AB	AB	AA	BB	AA	AB	AA	AA	BB	AB	AB		AB	AB	AA	AA	AB	AA	NC	NC	AA	AB	AB
444	AX-89820620	BB	BB	AB	BB	AB	BB	AB	BB	AB	BB	AA	AA	AA	AB	AB	AB	BB	AA	AB	BB	NC	AB	AA	AB	AB	AB	AB	AA	BB	AA	AB	AA	AB	BB	BB	AB		AB	AB	AA	AA	AB	AA	NC	NC	AA	AB	AB
445	AX-89877805	AB	AA	AB	AB	NC	AB	AB	BB	AB	AB	BB	BB	BB	AA	AB	AB	AB	BB	AB	AA	AA	AB	BB	AB	AB	AB	AB	AB	AA	NC	AB	BB	BB	AB	BB	AB		AB	AB	BB	BB	AB	BB	NC	NC	BB	AB	AB
446	AX-89782066	AB	AB	AB	BB	AB	BB	AB	BB	AB	BB	BB	BB	BB	NC	AB	AB	AB	BB	AB	AA	AA	AB	BB	AB	AB	AB	AB	BB	AA	BB	AB	BB	BB	BB	BB	AB		AB	AB	BB	BB	AB	BB	NC	NC	BB	AB	AB
447	AX-89820655	AB	AA	AB	AA	AB	AA	AB	BB	AB	AA	BB	BB	BB	AA	AB	AB	AB	BB	AB	AA	AA	AB	BB	AB	AB	AB	AB	BB	AA	BB	AB	BB	BB	AA	AB	AB		AB	AB	BB	BB	AB	BB	NC	NC	BB	AB	AB
448	AX-89782063	AB	AA	AB	AA	AB	AA	AB	AA	AB	AA	BB	BB	BB	NC	AB	AB	AB	BB	AB	AA	AA	AB	BB	AB	AB	AB	AB	BB	AA	BB	AB	BB	BB	AA	AA	AB		AB	AB	BB	BB	AB	BB	NC	NC	BB	AB	AB
449	AX-89907400	BB	AA	AB	BB	AB	BB	AB	BB	AB	BB	BB	BB	BB	BB	AB	AB	AA	BB	AB	AA	AA	AB	BB	AB	AB	AB	AB	BB	AA	BB	AB	BB	BB	BB	BB	AB		AB	AB	BB	BB	AB	BB	NC	NC	BB	AB	AB
450	AX-89820573	AB	AA	AB	AB	AA	AA	AA	AB	AB	AA	AB	AA	BB	AA	AB	AB	AA	AB	AA	AA	AA	AB	AB	AA	AA	AA	AA	AA	AA	AB	AB	AB	BB	BB	BB	AB		AA	AB	AA	AB	AA	AB	AA	AA	AB	AB	AA
451	AX-89781987	BB	AA	AB	BB	AA	BB	AA	BB	AB	BB	AB	AA	BB	BB	AB	AB	AA	AB	AA	AA	AA	AB	AB	AA	AA	AA	AA	AA	AA	AB	AB	AA	BB	BB	BB	AB		AA	AB	AA	AB	AA	AB	AA	AA	AB	AB	AA
452	AX-89820685	BB	AA	AB	BB	AA	BB	AA	AB	AB	BB	AB	AA	BB	BB	AB	AB	AB	AB	AA	AA	AA	AB	AB	AA	AA	NC	AA	AA	AA	AB	AB	AB	AB	BB	BB	AB		AA	AB	AA	AB	AA	AB	AA	AA	AB	AB	AA
453	AX-89782027	AB	BB	AB	BB	AB	BB	AB	BB	AB	BB	AA	AA	AA	NC	AB	AB	AB	AA	AB	NC	BB	AB	AA	AB	AB	AB	AB	AA	BB	AA	AB	AA	AA	BB	BB	AB		AB	AB	AA	AA	AB	AA	NC	NC	AA	AB	AB
454	AX-89847334	BB	AA	AB	BB	AA	BB	AA	AB	AB	BB	AB	AA	BB	BB	AB	AB	AB	AB	AA	AA	AA	AB	AB	AA	AA	AA	AA	AA	AA	AB	AB	AB	BB	BB	AB	AB		AA	AB	AA	AB	AA	AB	AA	AA	AB	AB	AA
455	AX-89782013	BB	AA	AB	AA	AB	AB	AB	AA	AB	AB	BB	BB	BB	NC	AB	AB	AB	BB	AB	AA	AA	AB	BB	AB	AB	AB	AB	BB	AA	BB	AB	BB	BB	AA	AB	AB		AB	AB	BB	BB	AB	BB	NC	NC	BB	AB	AB
456	AX-89782036	AA	BB	AB	AA	AB	AA	AB	AA	AB	AA	AA	AA	AA	NC	AB	AB	AB	AA	AB	BB	BB	AB	AA	AB	AB	AB	AB	AA	BB	AA	AB	AA	AA	AA	AA	AB		AB	AB	AA	AA	AB	AA	NC	NC	AA	AB	AB
457	AX-89847337	BB	AA	NC	BB	AA	AB	AA	AB	AB	BB	AB	AA	BB	AB	AB	AB	AA	AB	AA	AA	AA	AB	AB	AB	AA	AA	AA	AA	AA	AB	AB	AB	BB	AA	NC	AB		AA	AB	AA	AB	AA	AB	AA	AA	AB	AB	AA
458	AX-89904445	BB	BB	AB	BB	AB	AB	AB	AB	AB	BB	AA	AA	AB	AB	AB	AB	BB	AA	AB	BB	BB	AB	AA	AB	AB	AB	AB	AA	BB	AA	AB	AA	AA	AB	AA	AB		AB	AB	AA	AA	AB	AA	NC	NC	AA	AB	AB
459	AX-89820542	AA	BB	AB	AA	AB	AA	AB	AA	AB	AA	AA	AA	AA	AB	AB	AB	AB	AA	AB	BB	BB	AB	AA	AB	AB	AB	AB	AA	BB	AA	AB	AA	AA	AA	AA	AB		AB	AB	AA	AA	AB	AA	NC	NC	AA	AB	AB
460	AX-89781915	BB	AA	AB	AA	AB	AB	AB	AA	AB	AB	BB	BB	BB	NC	AB	AB	AB	BB	AB	NC	AA	AB	BB	AB	AB	AB	AB	BB	AA	BB	AB	BB	BB	AA	AB	AB		AB	AB	BB	BB	AB	BB	NC	NC	BB	AB	AB
461	AX-89781953	AA	AA	AB	AA	AB	AB	AB	AB	AB	AA	BB	BB	AB	AA	AB	AB	AB	BB	AB	AA	AA	AB	BB	AB	AB	AB	AB	BB	AA	BB	AB	BB	BB	AA	AA	AB		AB	AB	BB	BB	AB	BB	NC	NC	BB	AB	AB
462	AX-89847328	AB	BB	AB	AA	AB	AB	AB	AA	AB	AB	AA	AA	AA	AB	AB	AB	AB	AA	AB	BB	BB	AB	AA	AB	AB	AB	AB	AA	BB	AA	AB	AA	AA	AB	BB	AB		AB	AB	AA	AA	AB	AA	NC	NC	AA	AB	AB
463	AX-89781933	BB	NC	AB	BB	NC	BB	AB	BB	AB	BB	BB	BB	BB	BB	AB	AB	AB	BB	AB	AA	AA	AB	BB	AB	AB	NC	AB	BB	AA	BB	AB	BB	BB	BB	BB	AB		AB	AB	BB	BB	NC	BB	NC	NC	BB	AB	AB
464	AX-89867663	AB	AA	AB	BB	AB	BB	AB	BB	AB	BB	BB	BB	AB	BB	AB	AB	AB	BB	AB	AA	AA	AB	BB	AB	AB	AB	AB	BB	AA	BB	AB	BB	BB	BB	BB	AB		AB	AB	BB	BB	AB	BB	NC	NC	BB	AB	AB
465	AX-89781949	BB	AA	AB	AB	AB	AB	AB	BB	AB	BB	BB	BB	BB	NC	AB	AB	AB	BB	AB	AA	AA	AB	BB	AB	AB	AB	AB	BB	AA	BB	AB	BB	BB	AA	AB	AB		AB	AB	BB	BB	AB	BB	NC	NC	BB	AB	AB
466	AX-89820502	BB	BB	AB	BB	AB	BB	NC	BB	AB	BB	AA	AA	NC	BB	AB	AB	AB	AA	AB	BB	BB	AB	AA	AB	AB	AB	AB	AA	BB	AA	AB	AA	AA	BB	BB	AB		AB	AB	AA	AA	AB	AA	NC	NC	AA	AB	AB
467	AX-89820489	BB	AA	AB	BB	AB	AB	AB	BB	AB	BB	BB	BB	BB	AB	AB	AB	AB	BB	AB	AA	AA	AB	BB	AB	AB	AB	AB	BB	AA	BB	AB	BB	BB	AB	BB	AB		AB	AB	BB	BB	AB	BB	NC	NC	BB	AB	AB
468	AX-89904441	BB	AA	AB	BB	AB	BB	AB	BB	AB	BB	BB	BB	BB	BB	AB	AB	AA	BB	AB	AA	AA	AB	BB	AB	AB	AB	AB	BB	AA	BB	AB	BB	BB	BB	BB	AB		AB	AB	BB	BB	AB	BB	NC	NC	BB	AB	AB
469	AX-89904435	BB	AA	AB	BB	AB	BB	AB	BB	AB	BB	BB	BB	AB	BB	AB	AB	AA	BB	AB	AA	AA	AB	BB	AB	AB	AB	AB	BB	AA	BB	AB	BB	BB	BB	BB	AB		AB	AB	BB	BB	AB	BB	NC	NC	BB	AB	AB
470	AX-89820492	BB	BB	AB	BB	AB	BB	AB	BB	AB	BB	AA	AA	AA	AB	AB	AB	AB	AA	AB	BB	BB	AB	AA	AB	AB	AB	AB	AA	BB	AA	AB	AA	AA	BB	BB	AB		AB	AB	AA	AA	AB	AA	NC	NC	AA	AB	AB
471	AX-89820352	BB	BB	AB	BB	AB	BB	AB	BB	AB	BB	AA	AA	AA	AB	AB	AB	AB	AA	AB	BB	BB	AB	AA	AB	AB	AB	AB	AA	AB	AA	AB	AA	AA	BB	BB	AB		AB	AB	AA	AA	AB	AA	NC	NC	AA	AB	AB
472	AX-89862866	BB	BB	AB	BB	AB	AB	AB	AA	AB	BB	AA	AA	AA	AA	AB	AB	BB	AA	AB	BB	BB	AB	AA	AB	AB	AB	AB	AA	BB	AA	AB	AA	AA	AB	BB	AB		AB	AB	AA	AA	AB	AA	NC	NC	AA	AB	AB
473	AX-89820412	AA	BB	AB	AA	AB	AA	AB	AA	AB	AA	AA	AA	AA	AB	AB	AB	AB	AA	AB	NC	BB	AB	AA	AB	AB	AB	AB	AA	BB	AA	AB	AA	AA	AA	AA	AB		AB	AB	AA	AA	AB	AA	NC	NC	AA	AB	AB
474	AX-89781814	AA	BB	AB	AB	AB	AB	AB	AA	AB	AA	AA	AA	AA	NC	AB	AB	AB	AA	AB	BB	BB	AB	AA	AB	AB	AB	AB	AA	AB	AA	AB	AB	AA	BB	AB	AB		AB	AB	AA	AA	AB	AA	NC	NC	AA	AB	AB
475	AX-89820363	AA	AA	AB	AB	AB	AB	NC	BB	AB	AA	BB	BB	AB	BB	AB	AB	AB	BB	AB	AA	AA	AB	BB	AB	AB	AB	AB	BB	AB	BB	AB	BB	BB	AB	AB	AB		AB	AB	BB	BB	AB	BB	NC	NC	BB	AB	AB
476	AX-89847324	AA	BB	AB	AA	AB	AA	AB	AA	AB	AA	AA	AA	AA	AA	AB	AB	BB	AA	AB	BB	BB	AB	AA	AB	AB	AB	AB	AA	BB	AA	AB	AA	AA	AA	AA	AB		AB	AB	AA	AA	AB	AA	NC	NC	AA	AB	AB
477	AX-89781802	BB	AA	AB	BB	AB	BB	AB	BB	AB	BB	BB	BB	BB	NC	AB	AB	AB	BB	AB	AA	AA	AB	BB	AB	AB	AB	AB	BB	AB	BB	AB	BB	BB	BB	BB	AB		AB	AB	BB	BB	AB	BB	NC	NC	BB	AB	AB
478	AX-89781796	AB	AA	AB	AA	AB	AA	AB	AA	AB	AA	BB	BB	BB	AA	AB	AB	AB	BB	AB	AA	AA	AB	BB	AB	AB	AB	AB	BB	AB	BB	AB	BB	BB	AA	AA	AB		AB	AB	BB	BB	AB	BB	NC	NC	BB	AB	AB
479	AX-89781821	BB	AA	AB	AA	AB	BB	AB	AB	AB	AB	BB	BB	AB	AB	AB	AB	AB	BB	AB	AA	AA	AB	BB	AB	AB	AB	AB	BB	AB	BB	AB	NC	BB	AB	BB	AB		AB	AB	BB	BB	AB	BB	NC	NC	BB	AB	AB
480	AX-89781793	BB	BB	AB	AA	AB	BB	AB	AB	AB	AB	AA	AA	AB	NC	AB	AB	AB	AA	AB	BB	BB	AB	AA	NC	AB	AB	AB	AA	AB	AA	AB	AA	AA	AB	BB	AB		AB	NC	AA	AA	AB	AA	NC	NC	AA	AB	AB
481	AX-89781881	AA	AA	AB	AA	AB	AA	AB	AB	AB	AA	BB	BB	BB	AA	AB	AB	AB	BB	AB	AA	NC	AB	BB	AB	AB	AB	AB	BB	AA	BB	AB	BB	BB	AA	AA	AB		AB	AB	BB	BB	AB	BB	NC	NC	BB	AB	AB
482	AX-89820435	AB	NC	AB	AB	AB	AB	AB	BB	AB	AB	BB	BB	NC	AB	AB	AB	AB	BB	AB	AB	AA	AB	BB	BB	AB	NC	AB	BB	AB	BB	AB	BB	BB	AB	AB	AB		AB	AB	BB	BB	AB	BB	NC	NC	BB	AB	AB
483	AX-89819816	AB	AA	AA	AB	AA	BB	AA	AB	AA	AB	AA	AA	AA	BB	AA	AA	AB	AA	AA	AA	AA	AA	AA	AA	AA	AA	AA	AA	AA	AA	AA	AA	AA	AB	AA	AA		AA	NC	AA	AA	AA	AA	AA	NC	AA	NC	AA
484	AX-89806649	BB	BB	AB	AB	AB	BB	BB	BB	BB	BB	AA	AB	AB	BB	AB	BB	BB	BB	BB	BB	AB	BB	AB	BB	BB	BB	AB	AB	AB	NC	BB	BB	AA	BB	BB	BB		AB	BB	AB	BB	BB	AB	BB	AB	AB	AB	BB
485	AX-89822700	AA	AB	BB	AA	BB	AB	BB	AA	BB	AA	BB	AB	AB	AB	BB	AB	AB	NC	NC	AB	BB	BB	AA	BB	AB	AB	AB	AB	NC	AA	AB	BB	AB	AB	AB	AB		AB	BB	AB	AB	BB	AB	BB	BB	BB	BB	AB
486	AX-89783428	BB	AB	AA	BB	AA	BB	AA	BB	AA	BB	AA	AA	AA	BB	AA	AB	AB	AA	AA	AA	AA	AA	AA	AA	AB	AB	AA	AA	AB	AB	AB	AA	AB	BB	BB	AB		AA	AA	AA	AA	AA	AA	AA	AA	AA	AA	AA
487	AX-89822411	BB	AB	BB	BB	BB	BB	BB	BB	BB	BB	BB	BB	BB	BB	BB	AB	AB	BB	BB	BB	BB	BB	BB	BB	AB	AB	BB	BB	AB	NC	AB	BB	AB	BB	BB	AB		BB	BB	BB	BB	BB	BB	BB	BB	BB	BB	BB
488	AX-89822643	AA	AB	BB	AA	BB	AA	BB	AB	BB	AA	BB	BB	BB	AA	BB	AB	AB	BB	BB	NC	BB	BB	BB	BB	AB	AB	BB	BB	AB	AB	AB	BB	AB	AA	AA	AB		BB	BB	BB	BB	BB	BB	BB	BB	BB	BB	BB
489	AX-89783417	AA	AB	AA	AA	AA	AA	AA	AA	AA	AB	AA	AA	AA	AA	AA	AB	AB	AA	AA	AA	AA	AA	AA	AA	AB	AB	AA	AA	AB	AB	AB	AA	AB	AB	AB	AB		AA	AA	AA	AA	AA	AA	AA	AA	AA	AA	AA
490	AX-89822657	AB	AB	AA	BB	AA	AB	AA	AB	AA	NC	AA	AB	AA	BB	AA	AB	AB	AA	AA	AB	AA	AA	AB	AA	AB	AB	AB	AB	AB	BB	AB	AA	AB	AB	AB	AB		AB	AA	AB	AB	AA	AB	AA	AA	AA	AA	AB
491	AX-89822413	BB	AB	BB	BB	BB	BB	BB	AB	BB	BB	BB	BB	BB	BB	BB	AB	AB	BB	BB	BB	BB	BB	BB	BB	AB	AB	BB	BB	AB	AB	AB	BB	AB	BB	BB	AB		BB	BB	BB	BB	BB	BB	BB	BB	BB	BB	BB
492	AX-89823410	AA	AB	AB	AA	AB	AA	AA	AB	AA	AA	AA	AB	AA	AA	AA	AB	AB	NC	AA	AB	AB	AA	AB	AA	AB	AB	AB	AB	AB	AB	AB	AB	AB	AA	AB	AB		BB	AB	AB	AB	AB	AB	AA	AA	AB	AA	AB
493	AX-89823113	AB	AB	AB	AA	AB	AB	AA	AA	AA	AB	AA	AB	AA	AA	AA	AB	AB	AA	AA	AB	AB	AA	AB	AA	BB	AB	AB	AB	AB	AB	AB	AB	AB	AB	AB	AB		BB	AB	AB	AB	AB	BB	AA	AA	AB	AA	AB
494	AX-89783379	BB	AB	AB	BB	AB	BB	BB	BB	BB	BB	NC	AB	BB	BB	BB	AB	AB	BB	BB	AB	AB	BB	AB	BB	AA	AB	AB	AB	AB	AB	AB	AB	AB	BB	BB	AB		AA	AB	AB	BB	BB	AA	BB	BB	AB	BB	AB
495	AX-89819859	AB	AB	BB	BB	AB	BB	BB	BB	AA	BB	AB	AB	AA	BB	AA	AB	AB	AA	AB	BB	AB	AB	AB	AA	BB	BB	BB	AB	BB	AB	AB	AB	BB	AB	AB	BB		BB	AB	AB	BB	AB	BB	BB	BB	AB	AB	BB
496	AX-89822523	AA	AB	AB	AA	AB	AA	AA	AB	AA	AA	AA	AB	AA	AA	AA	AB	AB	AA	AA	AB	AB	AA	AB	AA	BB	AB	AB	AB	AB	AB	AB	AB	AB	AA	AA	AB		BB	AB	AB	AB	AA	BB	AA	AA	AB	AA	AB
497	AX-89822632	AA	AB	AB	AA	AB	AA	BB	AB	BB	AA	BB	AB	BB	AA	BB	AB	AB	BB	BB	AB	AB	BB	AB	BB	NC	AB	AB	AB	AB	AB	AB	AB	AB	AA	AA	AB		AA	AB	AB	AB	BB	AA	BB	BB	AB	BB	AB
498	AX-89784029	AB	AB	AB	AB	AB	AB	BB	AB	BB	AB	BB	AB	BB	AB	BB	AB	AB	BB	BB	AB	AB	BB	AB	BB	NC	AB	AB	AB	AB	AB	AB	AB	AB	BB	BB	AB		AA	AB	AB	AB	BB	AA	BB	BB	AB	BB	AB
499	AX-89781652	BB	AB	AA	AB	AB	AB	AB	BB	BB	BB	AB	AB	BB	NC	BB	AB	AA	BB	AB	AA	AB	AB	AB	BB	AA	AA	AA	AB	AA	AB	AB	AB	AA	AB	BB	AA		AA	AB	AB	AA	AB	AA	AA	AA	AB	AB	AA
500	AX-89783860	BB	AB	AB	BB	AB	BB	BB	BB	BB	BB	BB	AB	BB	BB	BB	AB	AB	BB	BB	AB	AB	BB	AB	BB	AA	AB	AB	AB	AB	AB	AB	AB	AB	AB	AB	AB		AA	AB	AB	AB	BB	AA	BB	BB	AB	BB	AB
501	AX-89879820	AA	AB	AB	AB	AB	AB	BB	AB	BB	AA	BB	AB	BB	AA	BB	AB	AB	BB	BB	AB	AB	BB	AB	AB	AA	AB	AB	AB	AB	AB	AB	AB	AB	AB	BB	AB		AA	AB	AB	AB	BB	AA	BB	BB	AB	BB	AB
502	AX-89819673	AA	AB	AA	AB	AB	AA	NC	AB	BB	AA	AB	AB	BB	AB	BB	AB	AB	BB	AB	AA	AB	AB	AB	BB	AA	NC	AA	AB	AA	AB	AB	AB	AA	AA	AA	AA		AA	AB	AB	AA	AB	AA	AA	AA	AB	AB	AA
503	AX-89823209	AB	AB	AB	AB	AB	AB	BB	AB	BB	AB	BB	AB	BB	AB	BB	AB	AB	BB	BB	AB	AB	BB	AB	BB	AA	AB	AB	AB	AB	AB	AB	AB	AB	BB	AB	AB		AA	AB	AB	AB	BB	AA	BB	BB	AB	BB	AB
504	AX-89876755	BB	AB	BB	AB	AB	BB	AB	BB	AA	AB	AB	AB	AB	BB	AA	AB	BB	AA	AB	BB	AB	AB	AB	AA	BB	BB	BB	AB	BB	NC	AB	AB	BB	BB	BB	BB		BB	AB	AB	BB	AB	BB	BB	BB	AB	AB	BB
505	AX-89822571	BB	AB	AB	BB	AB	BB	BB	AB	BB	BB	BB	AB	BB	BB	BB	AB	AB	BB	BB	AB	AB	BB	AB	BB	AA	AB	AB	AB	AB	AB	AB	AB	AB	BB	BB	AB		AA	AB	AB	AB	BB	AA	BB	BB	AB	BB	AB
506	AX-89847613	AB	AB	AB	AB	AB	AB	AA	AB	AA	AA	AA	AB	AA	AA	AA	AB	AB	AA	AA	AB	AB	AA	AB	AA	BB	AB	AB	AB	AB	AB	AB	AB	AB	AA	AB	AB		BB	AB	AB	AB	AA	BB	AA	AA	AB	AA	AB
507	AX-89822651	BB	AB	AB	BB	AB	BB	AA	AB	AA	BB	AA	AB	AA	BB	AA	AB	AB	AA	AA	AB	AB	AA	AB	AA	AB	AB	AB	AB	AB	AB	AB	AB	AB	BB	BB	AB		BB	AB	AB	AB	AA	BB	AA	AA	AB	AA	AB
508	AX-89781882	AA	AB	BB	AA	AB	AA	AB	AA	AA	AA	AB	AB	AA	NC	AA	AB	AB	AA	AB	BB	AB	AB	AB	AA	BB	BB	BB	AB	BB	AB	AB	AB	BB	AA	AA	BB		BB	AB	AB	BB	AB	BB	BB	BB	AB	AB	BB
509	AX-89847403	BB	AB	AA	BB	BB	BB	NC	AB	BB	BB	AB	AB	AB	BB	BB	AB	AA	BB	AB	AA	AB	AB	AB	BB	AA	AB	AA	AB	AA	AB	AB	AB	AA	BB	BB	AA		AA	AB	AB	AA	AB	AA	AA	AA	AB	AB	AA
510	AX-89872348	AA	AB	BB	AB	AA	AA	AB	AB	AA	AB	AB	AB	AB	AA	AA	AB	BB	AA	AB	BB	AB	AB	AB	NC	BB	AB	BB	AB	BB	AB	AB	AB	BB	AA	AA	BB		BB	AB	AB	BB	AB	BB	BB	BB	AB	AB	BB
511	AX-89783537	AA	AB	BB	AA	AA	AA	AB	AA	AA	AA	AB	AB	NC	NC	AA	AB	AB	AA	AB	BB	AB	AB	AB	AA	BB	AB	BB	AB	BB	AB	AB	AB	AB	AA	AA	BB		BB	AB	AB	BB	AB	BB	BB	BB	AB	AB	BB
512	AX-89822840	BB	AB	NC	AB	BB	BB	AB	AB	BB	AB	AB	AB	BB	BB	BB	AB	AB	AB	AB	AA	AB	AB	AB	NC	AA	AB	AA	AB	AA	AB	AB	AB	AA	BB	BB	AA		AA	AB	AB	AA	AB	AA	AA	AA	AB	AB	AA
513	AX-89783567	BB	AB	AA	BB	BB	BB	AB	BB	BB	BB	AB	AB	BB	NC	BB	AB	AB	BB	AB	AA	AB	AB	AB	BB	AA	AB	AA	AB	AA	AB	AB	AB	AB	BB	BB	AA		AA	AB	AB	AA	AB	AA	AA	AA	AB	AB	AA
514	AX-89783575	BB	AB	AA	BB	BB	BB	NC	BB	BB	AB	AB	AB	BB	NC	BB	AB	AB	BB	AB	AA	AB	AB	AB	BB	AA	AB	AA	AB	AA	AB	AB	AB	AB	BB	BB	AA		AA	AB	AB	AA	AB	AA	AA	AA	AB	AB	AA
515	AX-89822927	BB	AB	AB	BB	AA	BB	AA	BB	AA	BB	AA	AB	AA	AB	AA	AB	AB	AA	AA	AB	AB	AB	AB	AA	BB	AB	AB	AB	AA	AB	AB	AB	AA	AA	AA	AB		BB	AB	AB	BB	AB	BB	AB	AB	AB	AB	BB
516	AX-89783591	BB	AB	AA	BB	BB	BB	BB	BB	BB	BB	BB	AB	BB	NC	BB	AB	AB	BB	BB	AB	AB	AB	AB	BB	AA	AB	AB	AB	AB	AB	AB	AB	AB	BB	BB	AB		AA	AB	AB	AA	AB	AA	AB	AB	AB	AB	AA
517	AX-89822929	AA	AB	BB	AB	AA	AA	AA	AA	AA	AA	AA	AB	AA	AB	AA	AB	BB	AA	AA	AB	AB	AB	AB	AA	BB	AB	AB	AB	AB	AB	AB	AB	AB	AA	AA	AB		BB	AB	AB	BB	AB	BB	AB	AB	AB	AB	BB
518	AX-89822918	AA	AB	AB	BB	BB	AB	BB	BB	BB	AB	BB	BB	BB	AB	BB	BB	AB	BB	BB	BB	AB	AB	BB	BB	AB	BB	BB	BB	BB	BB	AB	BB	BB	BB	AB	BB		NC	AB	AB	NC	AB	NC	AB	AB	AB	AB	NC
519	AX-89822884	AB	AB	AA	AB	BB	AA	AB	AB	BB	BB	AB	AB	BB	AB	BB	AB	AB	BB	AB	AA	AB	AB	AB	BB	AA	AB	AA	AB	AA	AB	AB	AB	AB	BB	BB	AA		AA	AB	AB	AA	AB	AA	AA	AA	AB	AB	AA
520	AX-89872359	AB	AB	BB	BB	AA	AB	AA	AB	AA	BB	AB	BB	AA	AB	AB	AB	AB	AA	AA	AB	AB	AB	AB	AB	BB	AA	AB	AB	AB	AB	AB	AB	AA	BB	BB	AB		BB	BB	BB	BB	BB	BB	NC	NC	BB	BB	BB
521	AX-89904585	BB	AB	AA	BB	BB	BB	BB	BB	BB	BB	AB	AB	BB	BB	AB	AB	AB	BB	BB	AB	AB	AB	AB	AB	AA	BB	AB	AB	AB	AB	AB	AB	BB	BB	BB	AB		AA	AA	AA	AA	AB	AA	AB	AB	AB	AA	AA
522	AX-89822505	AB	AB	AA	BB	BB	BB	BB	BB	BB	BB	AB	AB	BB	AB	AB	AB	AB	BB	BB	AB	AB	AB	AB	AB	AA	BB	AB	AB	AB	AB	AB	AB	BB	BB	BB	AB		AA	AA	AA	AA	AB	AA	AB	AB	AB	AA	AA
523	AX-89847547	AB	AA	AA	BB	BB	AA	AA	BB	AB	AB	AB	BB	AB	BB	BB	AB	AB	BB	AA	AA	AB	AA	BB	AB	AB	BB	AB	AB	AB	AB	BB	BB	AB	BB	BB	AB		AB	AB	NC	AB	AB	AB	AB	AB	AB	AB	AB
524	AX-89847434	AB	BB	BB	AA	AA	AA	BB	AA	AB	AB	AB	AA	AB	AA	AA	AB	AB	AA	BB	BB	AB	BB	AA	AB	AB	AA	AB	AB	AB	AB	AA	AA	AB	AB	AB	AB		AB	AB	NC	AB	AB	AB	AB	AB	AB	AB	AB
525	AX-89872350	BB	BB	BB	BB	AA	BB	BB	BB	AB	BB	AB	AA	AB	BB	AA	AB	AB	AA	BB	BB	AB	BB	AA	AB	AB	AA	AB	AB	AB	AB	AA	AA	AB	BB	BB	AB		AB	AB	NC	AB	AB	AB	AB	AB	AB	AB	AB
526	AX-89911540	BB	BB	BB	BB	AB	BB	AA	BB	AB	BB	AB	AB	AB	BB	AB	AB	AB	AB	BB	BB	AB	BB	AB	AB	AB	AB	AB	AB	AB	AB	AB	AA	AB	BB	AB	AB		AB	AB	BB	AB	AB	AB	AB	AB	AB	AB	AB
527	AX-89783538	AA	NC	AA	AA	BB	AA	AA	AA	AB	AB	AB	BB	AB	AA	BB	AB	AB	BB	AA	AA	AB	AA	BB	NC	AB	BB	AB	AB	AB	AB	BB	BB	AB	AB	AB	AB		AB	AB	NC	AB	AB	AB	AB	AB	AB	AB	AB
528	AX-89879967	BB	AA	AA	BB	BB	AB	AA	BB	AB	BB	AB	BB	AB	AB	BB	AB	AB	BB	AA	AA	AB	AA	BB	AB	AB	BB	AB	AB	AB	AB	BB	NC	AB	AB	AB	AB		AB	AB	NC	AB	AB	AB	AB	AB	AB	AB	AB
529	AX-89821338	AB	AA	AA	BB	BB	BB	AA	BB	AB	BB	AB	BB	AB	BB	BB	AB	AB	BB	AA	AA	AB	AA	BB	AB	AB	BB	AB	AB	AB	AB	BB	BB	AB	BB	BB	AB		AB	AB	NC	AB	AB	AB	AB	AB	AB	AB	AB
530	AX-89820990	BB	AA	AA	BB	BB	BB	AA	BB	AB	BB	AB	BB	AB	BB	BB	AB	AB	BB	AA	AA	AB	AA	BB	AB	AB	BB	AB	AB	AB	AB	BB	BB	AB	BB	BB	AB		AB	AB	NC	AB	AB	AB	AB	AB	AB	AB	AB
531	AX-89782552	AB	AA	AA	BB	BB	AB	NC	BB	AB	AB	AB	BB	AB	AA	BB	AB	AB	BB	AA	AA	AB	AA	BB	AB	AB	BB	AB	AB	AB	NC	BB	BB	AB	AB	AB	AB		AB	AB	NC	AB	AB	NC	AB	AB	AB	AB	AB
532	AX-89904495	AA	AA	AA	AA	BB	AA	AA	AA	AB	AA	AB	BB	AB	AA	BB	AB	AB	BB	AA	AA	AB	AA	BB	AB	AB	BB	AB	AB	AB	AB	BB	BB	AB	AA	AA	AB		AB	AB	NC	AB	AB	AB	AB	AB	AB	AB	AB
533	AX-89782521	BB	AA	AA	BB	BB	BB	AA	BB	AB	BB	AB	BB	AB	NC	BB	AB	AB	BB	AA	AA	AB	AA	BB	AB	AB	BB	AB	AB	AB	AB	BB	BB	AB	BB	BB	AB		AB	AB	NC	AB	AB	AB	AB	AB	AB	AB	AB
534	AX-89820798	AB	BB	BB	BB	AA	AB	BB	AB	AB	BB	AB	AA	AB	AB	AA	AB	AB	AA	BB	BB	AB	BB	AA	AB	AB	AA	AB	AB	AB	AB	AA	AA	AB	BB	BB	AB		AB	AB	NC	AB	AB	AB	AB	AB	AB	AB	AB
535	AX-89820639	AB	BB	BB	BB	AA	BB	BB	AA	AB	NC	AB	AA	NC	BB	AA	AB	AB	AA	NC	AB	AB	NC	AA	AB	AB	AA	AB	AB	AB	AB	AA	AA	AB	AB	AA	AB		AB	AB	NC	AB	AB	AB	AB	AB	AB	AB	AB
536	AX-89782181	AA	BB	BB	BB	AA	AB	BB	BB	AB	AB	AB	AA	AB	NC	AA	AB	AB	AA	BB	BB	AB	BB	AA	AB	AB	AA	AB	AB	AB	AB	AA	AA	AB	BB	AB	AB		AB	AB	NC	AB	AB	AB	AB	AB	AB	AB	AB
537	AX-89821161	BB	BB	BB	BB	AA	BB	BB	BB	AB	BB	AB	AA	AB	BB	AA	AB	AB	AA	BB	BB	AB	BB	AA	AB	AB	AA	AB	AB	AB	AB	AA	AA	AB	BB	BB	AB		AB	AB	NC	AB	AB	AB	AB	AB	AB	AB	AB
538	AX-89821186	BB	AA	AA	AB	BB	AB	AA	BB	AB	AB	AB	BB	AB	AA	BB	AB	AB	NC	AA	AA	AB	AA	BB	AB	AB	BB	AB	AB	AB	AB	BB	NC	AB	AB	AB	AB		AB	AB	NC	AB	AB	AB	AB	AB	AB	AB	AB
539	AX-89821169	AB	BB	BB	BB	AA	BB	BB	BB	AB	BB	AB	AA	AB	BB	AA	AB	AB	AA	BB	BB	AB	BB	AA	AB	AB	AA	AB	AB	AB	AB	AA	AA	AB	BB	BB	AB		AB	AB	NC	AB	AB	AB	AB	AB	AB	AB	AB
540	AX-89782044	BB	AA	NC	BB	BB	BB	AA	BB	AB	BB	AB	BB	AB	NC	BB	AB	AB	BB	AA	AA	AB	AA	BB	AB	AB	BB	AB	AB	AB	AB	BB	BB	AB	BB	BB	AB		AB	AB	BB	AB	AB	AB	AB	AB	AB	AB	AB
541	AX-89820856	BB	BB	BB	BB	AA	BB	BB	BB	AB	BB	AB	AA	AB	BB	AA	AB	AB	NC	BB	BB	AB	BB	AB	BB	AB	NC	AB	AB	AB	AB	AA	AA	AB	AB	AB	AB		AB	AB	NC	NC	AB	NC	NC	AB	AB	AB	AB
542	AX-89821132	AA	BB	BB	AA	AA	AA	BB	AA	AB	AA	AB	AA	AB	AA	AA	AB	AB	AA	BB	BB	AB	BB	AA	AB	AB	AA	AB	AB	AB	AB	AA	AA	AB	AA	AA	AB		AB	AB	NC	AB	AB	AB	AB	AB	AB	AB	AB
543	AX-89878257	BB	BB	BB	AB	AA	BB	BB	AB	AB	AB	AB	AA	AB	BB	AA	AB	AB	AA	BB	BB	AB	BB	AA	AB	AB	AA	AB	AB	AB	AB	AA	AA	AB	AB	BB	AB		AB	AB	NC	AB	AB	AB	AB	AB	AB	AB	AB
544	AX-89782180	BB	BB	BB	BB	AA	BB	BB	BB	AB	BB	AB	AA	AB	BB	AA	AB	AB	AA	BB	BB	AB	BB	AA	AB	AB	AA	AB	AB	AB	AB	AA	AA	AB	BB	BB	AB		AB	AB	NC	AB	AB	AB	AB	AB	AB	AB	AB
545	AX-89781746	AB	AB	AB	BB	AB	AB	AB	BB	AA	AB	BB	AB	AB	BB	AA	AA	AB	AA	AB	AB	AB	AB	BB	AB	BB	AB	BB	AB	AA	AB	AB	BB	AB	BB	BB	AB		AA	BB	AB	AA	AB	AA	BB	BB	BB	BB	AB
546	AX-89781606	BB	AB	AB	AB	AB	AB	AB	BB	AA	BB	BB	AB	AB	NC	AA	AA	AB	AA	AB	AB	AB	AB	BB	AB	BB	AB	BB	AB	AA	AB	AB	BB	AB	AB	BB	AB		AA	BB	AB	AA	AB	AA	BB	BB	BB	BB	AB
547	AX-89781464	AA	AB	AB	AA	AB	AA	AB	AA	AA	AA	BB	AB	AB	AA	AA	AA	AB	AA	AB	AB	AB	AB	BB	AB	BB	AB	BB	AB	AA	AB	AB	BB	AB	AA	AA	AB		AA	BB	AB	AA	AB	AA	BB	BB	BB	BB	AB
548	AX-89782909	BB	AB	AB	BB	AB	BB	AA	BB	AA	BB	BB	AB	AB	BB	AA	AA	AA	NC	AB	AB	AB	AB	BB	BB	AB	AB	BB	AB	AA	AB	AA	BB	AB	BB	BB	AB		AA	BB	AB	AA	AB	AA	BB	BB	BB	BB	AB
549	AX-89823370	AB	AB	AB	AA	AB	AB	AB	AB	BB	AA	AA	AB	AB	AA	BB	BB	AB	BB	AB	AB	AB	AB	AA	AB	AB	AB	AA	AB	BB	AB	AB	AA	AB	AB	BB	AB		BB	AA	AB	BB	AB	BB	AA	AA	AA	AA	AB
550	AX-89821513	AA	AB	AB	AA	AB	AA	BB	AA	AA	AA	BB	AB	AB	AA	AA	AA	AB	AA	AB	AB	AB	AB	BB	AB	AB	AB	BB	AB	AA	AB	AB	BB	AB	AB	AB	AB		AA	BB	AB	AA	AB	AA	BB	BB	BB	BB	AB
551	AX-89782949	AB	AB	AB	BB	AB	AB	AB	BB	AA	BB	BB	AB	AB	AB	AA	AA	AB	AA	AB	AB	AB	AB	BB	AB	AB	AB	BB	AB	AA	AB	AB	BB	AB	BB	BB	AB		AA	BB	AB	AA	AB	AA	BB	BB	BB	BB	AB
552	AX-89823508	BB	BB	BB	BB	AB	BB	AB	BB	AB	BB	BB	BB	AB	BB	NC	AB	AB	AB	BB	BB	BB	BB	BB	BB	BB	BB	BB	BB	AB	BB	AB	BB	BB	BB	BB	BB		NC	BB	NC	NC	NC	NC	BB	BB	BB	BB	NC
553	AX-89823158	AB	AB	AB	AB	AB	BB	AB	AB	AA	BB	BB	AB	AB	BB	AA	AA	AB	AA	AB	AB	AB	AB	BB	AB	AB	AB	BB	AB	AA	AB	AB	BB	AB	AA	AA	AB		AA	BB	AB	AA	AB	AA	BB	BB	BB	BB	AB
554	AX-89823144	AB	AB	AB	AB	AB	AA	AB	BB	NC	AA	AA	AB	AB	AA	BB	BB	AB	BB	AB	AB	AB	AB	AA	BB	AB	AB	AA	AB	BB	AB	AB	AA	AB	BB	BB	AB		BB	AA	AB	BB	AB	BB	AA	AA	AA	AA	AB
555	AX-89860953	AA	AB	AB	BB	AB	AB	NC	AA	AA	AB	BB	AB	AB	AA	AA	NC	AB	AA	AB	AB	AB	AB	BB	NC	AB	AA	BB	AB	AA	AB	AB	BB	AB	AB	AB	AB		AA	BB	AB	AA	AB	AA	BB	BB	BB	BB	AB
556	AX-89823159	BB	AB	AB	BB	AB	BB	AB	AB	BB	BB	AA	AB	AB	BB	BB	BB	AB	BB	AB	AB	AB	AB	AA	AB	AB	AB	AA	AB	BB	AB	AB	AA	AB	AA	AB	AB		BB	AA	AB	BB	AB	BB	AA	AA	AA	AA	AB
557	AX-89823166	AB	AB	AB	BB	AB	BB	AB	AB	AA	BB	BB	AB	AB	AB	AA	AA	AB	AA	AB	AB	AB	AB	BB	AB	AB	AB	BB	AB	AA	AB	AB	BB	AB	BB	BB	AB		AA	BB	AB	AA	AB	AA	BB	BB	BB	BB	AB
558	AX-89783715	AB	BB	AB	AA	AB	AB	AB	AB	AA	AA	BB	AB	AB	BB	AA	AA	AB	AA	AB	AB	AB	BB	BB	BB	BB	AB	BB	AB	AA	AB	AB	BB	AB	AA	AB	AB		AA	BB	AB	AA	BB	AA	BB	BB	BB	BB	AB
559	AX-89823100	AA	BB	AB	AA	AB	AA	AB	AA	AA	AA	BB	AB	AB	AA	AA	AA	AB	AA	AB	AB	AB	BB	BB	BB	BB	AB	BB	AB	AA	AB	AB	BB	AB	AA	AA	AB		AA	BB	AB	AA	BB	AA	BB	BB	BB	BB	AB
560	AX-89803799	AA	AB	AB	AA	AB	AB	AB	AA	BB	AA	AA	AB	AB	AA	BB	BB	AB	BB	AB	AB	AB	AB	AA	AB	AB	AB	AA	AB	BB	AB	AB	AA	AB	AA	AA	AB		BB	AA	AB	BB	AA	BB	AA	AA	AA	AA	AB
561	AX-89783733	AA	AB	AB	AA	AB	AA	AB	AA	BB	NC	AA	AB	AB	AA	BB	BB	AB	BB	AB	AA	AB	AB	AA	AB	AB	AB	AA	AB	BB	AB	AB	AA	AB	AB	AB	AB		BB	AA	AB	BB	AB	BB	AA	AA	AA	AA	AB
562	AX-89823102	AB	AA	AB	BB	AB	BB	AB	BB	BB	BB	AA	AB	AB	AB	BB	BB	AB	BB	AB	AB	AB	AA	AA	AA	AA	AB	AA	AB	BB	AB	AB	AA	AB	BB	BB	AB		BB	AA	AB	BB	AA	BB	AA	AA	AA	AA	AB
563	AX-89823083	AA	AB	AB	AA	AB	AA	AB	AA	AA	AA	BB	AB	AB	AA	AA	AA	AB	AA	AB	AB	AB	AB	BB	NC	AB	AB	BB	AB	AA	AB	AB	BB	AB	AA	AA	AB		AA	BB	AB	AA	BB	AA	BB	BB	BB	BB	AB
564	AX-89823124	AB	AB	BB	AA	BB	AA	AB	BB	AB	AB	BB	BB	AB	BB	AB	AB	AB	AB	BB	BB	AB	AB	BB	BB	BB	BB	BB	BB	AB	BB	AB	BB	BB	AA	AB	BB		NC	BB	NC	NC	NC	NC	BB	BB	BB	BB	NC
565	AX-89823117	BB	BB	AB	BB	AB	BB	NC	AB	AA	BB	BB	AB	AB	AB	AA	AA	AB	NC	AB	AB	AB	BB	BB	BB	BB	AB	BB	AB	AA	AB	AB	BB	AB	BB	BB	AB		AA	BB	AB	AA	AB	AA	BB	BB	BB	BB	AB
566	AX-89823104	AB	BB	AB	AB	AB	AB	NC	AB	NC	AB	BB	AB	AB	AB	AA	NC	AB	AA	AB	AB	AB	BB	BB	BB	BB	NC	BB	AB	AA	AB	AB	BB	AB	AB	AB	AB		AA	BB	AB	AA	BB	AA	BB	BB	BB	BB	AB
567	AX-89783722	AA	AA	AB	AA	AB	AA	AB	AA	BB	AA	AA	AB	AB	AA	BB	BB	AB	BB	AB	AB	AB	AA	AA	AA	AA	AB	AA	AB	BB	AB	AB	AA	AB	AA	AA	AB		BB	AA	AB	BB	AB	BB	AA	AA	AA	AA	AB
568	AX-89823045	AB	AB	AB	AB	AB	AA	AB	BB	BB	AA	AA	AB	AB	AB	BB	BB	AB	BB	AB	AB	AB	AB	AA	AB	AB	AB	AA	AB	BB	AB	AB	AA	AB	BB	BB	AB		BB	AA	AB	BB	AA	BB	AA	AA	AA	AA	AB
569	AX-89851687	AB	AB	AB	BB	AB	BB	AB	BB	AA	BB	BB	AB	AB	BB	AA	AA	AB	AA	AB	AB	AB	AB	BB	AB	AB	AB	BB	AB	AA	AB	AB	BB	AB	BB	AB	AB		AA	BB	AB	AA	BB	AA	BB	BB	BB	BB	AB
570	AX-89806836	AA	AB	AB	AA	AB	AA	AB	AA	BB	AA	AA	AB	AB	AA	BB	BB	AB	BB	AB	AB	AB	AB	AA	AB	AB	AB	AA	AB	BB	AB	AB	AA	AB	AB	BB	AB		BB	AA	AB	BB	AA	BB	AA	AA	AA	AA	AB
571	AX-89904628	AB	AB	AB	BB	AB	BB	AB	BB	AA	BB	BB	AB	NC	AB	AA	AA	AB	AA	AB	AB	AB	AB	BB	AB	AB	AB	BB	AB	AA	AB	AB	BB	AB	AB	AB	AB		AA	BB	AB	AA	BB	AA	BB	BB	BB	BB	AB
572	AX-89823028	BB	AB	AB	AB	AB	BB	AB	AB	NC	AB	AA	NC	AB	BB	BB	NC	AB	NC	AB	NC	AB	AB	NC	AB	AB	AB	AA	AB	BB	AB	AB	AA	AB	BB	BB	AB		BB	AA	AB	BB	AA	BB	AA	AA	AA	AA	AB
573	AX-89783403	BB	AA	AA	AB	AA	AB	AA	AB	AA	BB	AA	AA	AA	AB	AA	AA	AB	AA	AA	AA	AA	AA	AA	AA	AA	AB	AA	AA	AA	NC	AA	AA	AA	AB	AA	AA		AA	AA	AA	AA	AA	AA	AA	AA	AA	AA	AA
574	AX-89822588	BB	AB	AA	AB	AB	BB	AB	AB	AA	AB	AB	AA	AB	BB	AA	AA	AB	AA	AA	AA	AB	AB	AB	AA	AA	AA	AB	AA	AA	AA	AB	AB	AA	AB	BB	AA		NC	NC	NC	AA	NC	AA	NC	NC	NC	NC	NC
575	AX-89822585	AA	AB	BB	AA	AA	AA	AB	AB	AA	AA	BB	AB	AB	AA	AB	AA	AB	AA	AB	AB	AB	AB	BB	AB	AB	AB	BB	AB	AB	AA	AB	AB	BB	AA	AA	AB		NC	BB	AB	NC	BB	NC	BB	BB	BB	BB	AB
576	AX-89822598	AB	AB	AB	BB	AB	AB	AB	AB	AA	AB	BB	AB	NC	BB	AA	AA	AB	NC	AB	AB	AB	AB	BB	AB	AB	AB	BB	AB	AA	AB	AB	BB	AB	AB	AB	AB		AA	BB	AB	AA	BB	AA	BB	BB	BB	BB	AB
577	AX-89847534	AB	AB	AB	AA	BB	AB	AB	AA	BB	AB	AA	AB	AB	AA	BB	BB	AB	BB	AB	AB	AB	AB	AA	AB	AB	AB	AA	AB	BB	BB	AB	AB	AB	AA	AA	AB		BB	AA	AB	BB	AA	BB	AA	AA	AA	AA	AB
578	AX-89822627	AB	AB	AB	AA	AA	AA	AB	AA	AA	AA	BB	AB	AB	AB	AA	AA	AB	AA	AB	AB	AB	AB	BB	AB	AB	AB	BB	AB	AA	AA	AB	AB	AB	AA	AA	AB		AA	BB	AB	AA	BB	AA	BB	BB	BB	BB	AB
579	AX-89904577	AB	AB	AB	AA	AA	AA	AB	AA	AA	AA	BB	AB	AB	AB	AA	AA	AB	AA	AB	AB	AB	AB	BB	AB	AB	AB	BB	AB	AB	AA	AB	AB	AB	AB	AB	AB		AA	BB	AB	AA	BB	AA	BB	BB	BB	BB	AB
580	AX-89815367	AB	AB	AB	AB	BB	AB	AB	AA	AB	BB	AA	AB	AB	NC	BB	BB	BB	AB	AB	AB	AB	AB	AA	NC	AB	AB	AA	AB	AB	BB	AB	AB	AB	AB	AB	AB		BB	AA	AB	BB	AA	BB	AA	AA	AA	AA	AB
581	AX-89822658	AB	AB	AB	BB	AA	BB	AB	BB	AB	BB	BB	AB	AB	AB	AA	AA	AB	AB	AB	AB	AB	AB	BB	AB	AB	AB	BB	AB	AB	AA	AB	AB	AB	BB	BB	AB		AA	BB	AB	AA	BB	AA	BB	BB	BB	BB	AB
582	AX-89783277	BB	AB	AB	BB	AA	BB	NC	BB	AA	BB	BB	AB	AB	BB	AA	AA	AB	AA	AB	AB	AB	AB	BB	NC	AB	AB	BB	AB	AB	AA	AB	AB	AB	BB	BB	AB		AA	BB	AB	AA	BB	AA	BB	BB	BB	BB	AB
583	AX-89822758	AB	AB	AB	BB	AA	BB	AB	BB	AB	BB	BB	AB	AB	AB	AA	AA	AB	AB	AB	AB	AB	AB	BB	AB	AB	AB	BB	AB	AB	AA	AB	AB	AB	BB	BB	AB		AA	BB	AB	AA	BB	AA	BB	BB	BB	BB	AB
584	AX-89783529	BB	AB	AB	BB	AA	BB	AB	BB	AA	BB	BB	AB	AB	BB	AA	AA	AA	AA	AB	AB	AB	AB	BB	AB	AB	AB	BB	AB	AB	AA	AB	AB	AB	BB	BB	AB		AA	BB	AB	AA	BB	AA	BB	BB	BB	BB	AB
585	AX-89806798	AA	AB	AB	AA	BB	AA	AB	AA	AB	AA	AA	NC	AB	AA	BB	BB	AB	AB	AB	BB	AB	AB	AB	NC	AB	AB	AB	BB	AB	BB	AB	AB	AB	AA	AA	AB		BB	AA	BB	BB	AA	BB	AA	AA	AA	AA	BB
586	AX-89822799	BB	AB	AB	BB	AA	BB	AB	BB	AA	BB	BB	AB	AB	AB	AA	AA	AA	AA	AB	AB	AB	AB	BB	AB	AB	AB	BB	AB	AB	AA	AB	AB	AB	AA	AA	AB		AA	BB	AB	AA	BB	AA	BB	BB	BB	BB	AB
587	AX-89783280	AA	AB	AB	AA	BB	AA	AB	AA	BB	AA	AA	AB	AB	NC	BB	BB	AB	BB	AB	AB	AB	AB	AA	AB	AB	AB	AA	AB	AB	BB	AB	AB	AB	AA	AA	AB		BB	AA	AB	BB	AA	BB	AA	AA	AA	AA	AB
588	AX-89783474	BB	AB	AB	BB	BB	BB	AB	BB	AB	BB	AA	AB	AB	NC	BB	BB	AB	AB	AB	AB	AB	AB	AA	AB	AB	AB	AA	AB	AB	AB	AB	AB	AB	BB	BB	AB		BB	AA	AB	BB	AA	BB	AA	AA	AA	AA	AB
589	AX-89811700	AB	AB	AB	AB	AA	AB	AB	BB	AA	AB	BB	AB	AB	NC	AA	AA	AA	AA	AB	AB	AB	AB	BB	AB	AB	AB	BB	AB	AB	AA	AB	AB	AB	AB	AB	AB		AA	BB	AB	AA	BB	AA	BB	BB	BB	BB	AB
590	AX-89822675	AA	AB	AB	AA	BB	AA	AB	AA	BB	AA	AA	AB	AB	AA	BB	BB	BB	BB	AB	AB	AB	AB	AA	AB	AB	AB	AA	AB	AB	BB	AB	AB	AB	AA	AB	AB		BB	AA	AB	BB	AA	BB	NC	AA	AA	AA	AB
591	AX-89783505	AB	AA	AA	AB	AA	AB	AA	BB	AA	AB	AA	AA	AA	AA	AA	AA	AA	AA	AA	AA	AA	AA	AA	AA	AA	AB	AA	AA	AA	NC	AA	AA	AA	AB	BB	AA		AA	AA	AA	AA	AA	AA	AA	AA	AA	AA	AA
592	AX-89822433	BB	AB	AB	BB	BB	BB	AB	AB	BB	BB	AA	AB	AB	BB	BB	BB	BB	BB	AB	AB	AB	AB	AA	AB	AB	AB	AA	AB	AB	BB	AB	AB	AB	BB	BB	AB		BB	AA	AB	BB	AA	BB	AA	AA	AA	AA	AB
593	AX-89783445	AB	AB	BB	AA	AB	AA	BB	AA	BB	AA	BB	BB	AB	AA	AB	AB	AB	BB	BB	BB	AB	BB	AB	AB	AB	BB	BB	BB	AB	NC	BB	BB	BB	AB	BB	BB		BB	BB	BB	BB	BB	BB	BB	BB	BB	BB	BB
594	AX-89823199	AA	AB	AB	AA	AB	AA	AA	AB	AA	AA	AA	AB	AB	AB	BB	AB	AB	AB	AA	AA	AB	AA	AB	AB	AB	BB	AA	AA	AB	AA	AB	AA	AB	AA	AA	AB		BB	AA	AB	BB	AA	BB	AA	AA	AA	AA	AB
595	AX-89783905	BB	AB	AB	BB	AB	AB	BB	BB	BB	BB	BB	AB	AB	AB	AA	AB	AB	AB	BB	BB	AB	BB	AB	AB	AB	AA	BB	BB	AB	BB	AB	BB	AB	AB	AB	AB		AA	BB	AB	AA	BB	AA	BB	BB	BB	BB	AB
596	AX-89783780	BB	AB	AB	BB	AB	BB	AA	BB	AA	BB	AA	AB	AB	BB	BB	AB	AB	AB	AA	AA	AB	AA	AB	BB	AB	BB	AA	AA	AB	AA	AB	AA	AB	BB	BB	AB		BB	AA	AB	BB	AA	BB	AA	AA	AA	AA	AB
597	AX-89823310	BB	AB	AB	BB	AB	BB	AA	AB	AA	BB	AA	AB	AB	BB	BB	AB	AB	AB	AA	AA	AB	AA	AB	AB	AB	BB	AA	AA	AB	AA	AB	AA	AB	AA	AA	AB		BB	AA	AB	BB	AA	BB	AA	AA	AA	AA	AB
598	AX-89783805	BB	AB	AB	BB	AB	BB	AA	BB	AA	AB	AA	AB	AB	BB	BB	AB	AB	AB	AA	AA	AB	AA	AB	AB	AB	BB	AA	AA	AB	AA	AB	AA	AB	AB	AB	AB		BB	AA	AB	BB	AA	BB	AA	AA	AA	AA	AB
599	AX-89823287	AB	AB	AB	BB	BB	BB	AB	AB	AB	AB	AA	AB	BB	AA	BB	AB	AB	AB	AB	AB	AB	AB	AB	AB	AB	BB	AA	AB	AB	BB	AB	AA	BB	BB	AB	AB		BB	AA	AB	BB	AA	BB	AA	AA	AA	AA	AB
600	AX-89823317	AB	AB	AB	AA	AB	AB	BB	AB	BB	AA	BB	AB	AB	AA	AB	AB	AB	AB	BB	BB	AB	BB	AB	AB	AB	AA	BB	BB	AB	BB	AB	BB	AB	BB	BB	AB		AA	BB	AB	NC	BB	AA	BB	BB	BB	BB	AB
601	AX-89823284	BB	AB	AB	BB	BB	BB	AB	AB	AB	BB	AA	AB	BB	BB	BB	AB	AB	AB	AB	AB	AB	AA	AB	AB	AB	BB	AA	AB	AB	BB	AB	AA	BB	AB	AB	AB		BB	AA	AB	BB	AA	BB	AA	AA	AA	AA	AB
602	AX-89783772	AA	AB	AB	AA	AB	AA	AA	AA	AA	AB	AA	AB	AB	AA	BB	AB	AB	AB	AA	AA	AB	AA	AB	AB	AB	BB	AA	AA	AB	AA	AB	AA	AB	AB	AB	AB		BB	AA	AB	BB	AA	BB	AA	AA	AA	AA	AB
603	AX-89783809	BB	AB	AB	BB	AB	BB	BB	BB	BB	BB	BB	AB	AB	BB	NC	AB	AB	AB	BB	BB	AB	BB	AB	AB	AB	AA	BB	BB	AB	BB	AB	BB	AB	AB	AB	AB		NC	BB	AB	AA	BB	AA	BB	BB	BB	BB	AB
604	AX-89783844	BB	AB	AA	BB	NC	BB	AB	BB	AB	BB	AA	AB	BB	NC	AB	AB	AB	AB	AB	AB	AB	AA	AB	AB	AB	BB	AA	AB	AA	BB	AB	AA	AB	AB	AB	AB		NC	AA	AB	NC	AA	NC	AA	AA	AA	AA	AB
605	AX-89783882	AA	AB	AB	AA	AB	AA	AA	AA	AA	AA	AA	AB	AB	AB	BB	AB	NC	AB	AA	AA	AB	AA	AB	AB	AB	BB	AA	AA	AB	AA	AB	AA	AB	AB	AB	AB		BB	AA	AB	BB	AA	BB	AA	AA	AA	AA	AB
606	AX-89783903	BB	AB	BB	BB	AB	AB	AA	BB	AA	BB	AB	AB	AB	AB	BB	AB	AB	AB	AA	AA	AB	AA	AB	AB	AB	BB	AA	AA	BB	AA	AB	AA	BB	AB	AB	AB		BB	NC	AB	BB	NC	BB	NC	NC	NC	NC	AB
607	AX-89803830	BB	AB	AB	BB	BB	AB	AB	BB	AB	BB	AA	AB	BB	BB	BB	AB	AB	AB	AB	AB	AB	AA	AB	NC	AB	BB	AA	AB	AB	BB	AB	AA	BB	BB	BB	AB		BB	AA	AB	BB	AA	BB	AA	AA	AA	AA	AB
608	AX-89819605	BB	NC	AB	BB	BB	BB	BB	BB	AA	BB	AB	AA	AA	BB	BB	AB	AB	AB	AB	NC	AB	AB	AA	AB	NC	AB	AA	AB	AB	NC	BB	AB	AB	BB	BB	AA		AB	AB	AB	AB	NC	AB	NC	AB	AB	AB	NC
609	AX-89781223	AA	BB	BB	AA	BB	AA	BB	AB	BB	AA	BB	BB	BB	AB	BB	BB	BB	BB	BB	BB	BB	BB	BB	BB	BB	BB	BB	BB	BB	NC	BB	BB	BB	AA	AA	BB		BB	BB	BB	BB	BB	BB	BB	BB	BB	BB	BB
610	AX-89819677	AB	BB	BB	AB	AB	BB	AB	AB	BB	AB	BB	AB	AB	BB	AB	BB	BB	BB	BB	BB	BB	BB	AB	AB	BB	AB	BB	AB	BB	AB	AB	AB	AB	AB	AA	BB		BB	BB	BB	BB	BB	AB	AB	BB	BB	BB	AB
611	AX-89781244	AA	BB	BB	AA	BB	BB	BB	AA	BB	AA	BB	BB	BB	AB	BB	BB	BB	BB	BB	BB	BB	BB	BB	BB	BB	BB	BB	BB	BB	NC	BB	BB	BB	AA	AB	BB		BB	BB	BB	BB	BB	BB	BB	BB	BB	BB	BB
612	AX-89819697	BB	BB	BB	AB	BB	AB	BB	BB	BB	AB	BB	BB	BB	BB	BB	BB	BB	BB	BB	BB	BB	BB	BB	BB	BB	BB	BB	BB	BB	NC	BB	BB	BB	BB	BB	BB		BB	BB	BB	BB	BB	BB	BB	BB	BB	BB	BB
613	AX-89847252	BB	AA	AA	BB	AA	AB	AA	AB	AA	BB	AA	AA	AA	BB	AA	AA	AA	AA	AA	AA	AA	AA	AA	AA	AA	AA	AA	AA	AA	NC	AA	AA	AA	BB	BB	AA		AA	AA	AA	AA	AA	AA	AA	AA	AA	AA	AA
614	AX-89781276	AB	AA	AA	AB	AA	BB	AA	AB	AA	AB	AA	AA	AA	BB	AA	AA	AA	AA	AA	AA	AA	AA	AA	AA	AA	AA	AA	AA	AA	NC	AA	AA	AA	BB	AB	AA		AA	AA	AA	AA	AA	AA	AA	AA	AA	AA	AA
615	AX-89904370	BB	BB	BB	BB	BB	AA	BB	BB	BB	BB	BB	BB	AA	AB	BB	BB	BB	BB	BB	BB	BB	BB	BB	BB	BB	BB	BB	BB	BB	NC	BB	BB	BB	BB	AB	BB		BB	BB	BB	BB	BB	BB	BB	BB	BB	BB	BB
616	AX-89819728	BB	AA	AA	BB	AA	AA	AA	BB	AA	BB	AA	AA	AA	AB	AA	AA	AA	AA	AA	AA	AA	AA	AA	AA	AA	AA	AA	AA	AA	NC	AA	AA	AA	BB	AB	AA		AA	AA	AA	AA	AA	AA	AA	AA	AA	AA	AA
617	AX-89819729	BB	BB	BB	BB	BB	AA	BB	BB	BB	BB	BB	BB	BB	AB	BB	BB	BB	BB	BB	BB	BB	BB	BB	BB	BB	BB	BB	BB	BB	NC	BB	AB	BB	BB	AB	BB		BB	BB	BB	BB	BB	BB	BB	BB	BB	BB	BB
618	AX-89819755	AB	AA	AA	BB	AA	AB	AA	BB	AA	AB	AA	AA	AA	AA	AA	AA	AA	AA	AA	AA	AA	AA	AA	AA	AA	AA	AA	AA	AA	NC	AA	AA	AA	AB	BB	AA		AA	AA	AA	AA	AA	AA	AA	AA	AA	AA	AA
619	AX-89781300	AB	BB	BB	BB	BB	AB	BB	BB	BB	AB	BB	BB	BB	AA	BB	BB	BB	BB	BB	BB	BB	BB	BB	BB	BB	BB	BB	BB	BB	NC	BB	BB	BB	AB	BB	BB		BB	BB	BB	BB	BB	BB	BB	BB	BB	BB	BB
620	AX-89847258	AB	AA	AA	AB	AA	AA	AA	BB	AA	AA	AA	AA	NC	AA	AA	AA	AA	AA	AA	AA	AA	AA	AB	AA	AA	AA	AA	AA	AA	NC	AA	AA	AA	AA	AA	AA		AA	AA	AA	AA	AA	AA	AA	AA	AA	AA	AA
621	AX-89819777	AB	AA	AA	BB	AA	AB	AA	BB	AA	AB	AA	AA	AA	AA	AA	AA	AA	AA	AA	AA	AA	AA	AA	AA	AA	AA	AA	AA	AA	NC	AA	AA	AA	AB	BB	AA		AA	AA	AA	AA	AA	AA	AA	AA	AA	AA	AA
622	AX-89820064	AB	BB	BB	AB	BB	AB	BB	AB	AB	AB	AB	BB	BB	AA	BB	BB	BB	BB	BB	AB	AB	AB	BB	AB	AB	BB	AB	BB	BB	BB	BB	AB	BB	AB	AA	AB		BB	NC	NC	BB	BB	BB	NC	BB	BB	NC	BB
623	AX-89820059	AA	AA	AA	AA	AA	AA	AA	AA	NC	AA	AB	AA	AA	AA	AA	AA	AA	AA	AA	BB	BB	NC	AA	AB	AB	AA	BB	AA	AA	AA	AA	AB	AA	AA	AA	AB		AA	NC	NC	AA	AA	AA	NC	AA	AA	NC	AA
624	AX-89820045	AB	AA	AA	AB	AA	AB	AA	BB	AA	AB	AA	AA	AA	AA	AA	AA	AA	AA	AA	AA	AA	AA	AA	AA	AA	AA	AA	AA	AA	NC	AA	AA	AA	AB	BB	AA		AA	AA	AA	AA	AA	AA	AA	AA	AA	AA	AA
625	AX-89820137	BB	BB	BB	BB	BB	BB	BB	BB	BB	BB	BB	BB	BB	BB	BB	BB	BB	BB	BB	BB	BB	BB	BB	BB	BB	BB	BB	BB	BB	NC	BB	BB	BB	BB	BB	BB		BB	BB	BB	BB	BB	BB	BB	BB	BB	BB	BB
626	AX-89904404	AB	BB	BB	AA	BB	AB	BB	AA	AB	AA	AB	BB	BB	BB	AB	BB	BB	AB	BB	AA	AA	AB	BB	AB	AB	BB	AB	BB	BB	BB	AB	AB	BB	AA	AB	AB		BB	NC	NC	BB	BB	BB	NC	BB	BB	NC	BB
627	AX-89781645	AB	BB	BB	BB	BB	AB	BB	BB	BB	NC	BB	BB	BB	AB	BB	BB	BB	BB	BB	BB	BB	BB	BB	BB	BB	BB	BB	BB	BB	NC	BB	BB	BB	AB	BB	BB		BB	BB	BB	BB	BB	BB	BB	BB	BB	BB	BB
628	AX-89877272	AB	BB	BB	BB	BB	AB	BB	BB	BB	AB	BB	BB	BB	AA	BB	BB	BB	BB	BB	BB	BB	BB	BB	BB	BB	BB	BB	BB	BB	NC	BB	BB	BB	AB	BB	BB		BB	BB	BB	BB	BB	BB	BB	BB	BB	BB	BB
629	AX-89820172	AA	AA	AA	AA	AA	AA	AA	AB	AB	AA	AB	AA	AA	AA	AB	AA	AA	AB	AA	BB	BB	AB	AA	AB	AB	AA	AB	AA	AA	AA	AB	AB	AA	AA	AA	AB		AA	NC	NC	AA	AA	AA	NC	AA	AA	NC	AA
630	AX-89781675	AB	AA	AA	BB	AA	AB	AA	BB	AA	AB	AA	AA	AA	AB	AA	AA	AA	AA	AA	AA	AA	AA	AA	AA	AA	AA	AA	AA	AA	NC	AA	AA	AA	AB	BB	AA		AA	AA	AA	AA	AA	AA	AA	AA	AA	AA	AA
631	AX-89781680	BB	BB	BB	BB	BB	BB	BB	BB	BB	BB	BB	BB	AB	BB	BB	BB	BB	BB	BB	BB	BB	BB	BB	BB	BB	BB	BB	BB	BB	NC	BB	BB	BB	AB	AB	BB		BB	BB	BB	BB	BB	BB	BB	BB	BB	BB	BB
632	AX-89820224	AB	AA	AA	BB	AA	AB	AA	BB	AA	AB	AA	AA	AA	AB	AA	AA	AA	AA	AA	AA	AA	AA	AA	AA	AA	AA	AA	AA	AA	NC	AA	AA	AA	AB	BB	AA		AA	AA	AA	AA	AA	AA	AA	AA	AA	AA	AA
633	AX-89820226	AB	BB	BB	AB	BB	BB	BB	AB	BB	AB	BB	BB	AB	BB	BB	BB	BB	BB	BB	BB	BB	BB	BB	BB	BB	BB	BB	BB	BB	NC	BB	BB	BB	BB	AB	BB		BB	BB	BB	BB	BB	BB	BB	BB	BB	BB	BB
634	AX-89820230	AB	BB	BB	AB	BB	NC	BB	AB	BB	AB	BB	BB	BB	AA	BB	BB	BB	BB	BB	BB	BB	BB	BB	BB	BB	BB	BB	BB	BB	NC	BB	BB	BB	NC	AB	BB		BB	BB	BB	BB	BB	BB	BB	BB	BB	BB	BB
635	AX-89862853	AA	AA	AA	AB	AA	AA	AA	AA	AA	BB	AA	AA	AA	AA	AA	AA	AA	AA	AA	AA	AA	AA	AA	AA	AA	AA	AA	AA	AA	NC	AA	AA	AA	AA	AA	AA		AA	AA	AA	AA	AA	AA	AA	AA	AA	AA	AA
636	AX-89820237	AB	AA	AA	BB	AA	BB	AA	BB	AA	AB	AA	AA	AA	AB	AA	AA	AA	AA	AA	AA	AA	AA	AA	AA	AA	AA	AA	AA	AA	NC	AA	AA	AA	BB	BB	AA		AA	AA	AA	AA	AA	AA	AA	AA	AA	AA	AA
637	AX-89851380	BB	BB	BB	BB	BB	AB	BB	AB	BB	BB	BB	BB	BB	AA	BB	BB	BB	BB	BB	BB	BB	BB	BB	BB	BB	BB	BB	BB	BB	NC	BB	BB	BB	AB	BB	BB		BB	BB	BB	BB	BB	BB	BB	BB	BB	BB	BB
638	AX-89781718	BB	AA	AA	BB	AA	AB	AA	AB	AA	BB	AA	AA	AA	AA	AA	AA	AA	AA	AA	AA	AA	AA	AA	AA	AA	AA	AA	AA	AA	NC	AA	AA	AA	AB	BB	AA		AA	AA	AA	AA	AA	AA	AA	AA	AA	AA	AA
639	AX-89781726	BB	BB	AB	BB	BB	BB	AB	AB	AB	BB	BB	BB	AB	BB	BB	BB	AB	BB	AB	BB	BB	AB	BB	BB	BB	AB	BB	AB	AB	AA	BB	AB	AB	BB	BB	BB		BB	BB	BB	BB	BB	AB	BB	BB	BB	BB	AB
640	AX-89781730	AB	BB	BB	AB	BB	AA	BB	AB	BB	AB	BB	BB	BB	BB	BB	BB	BB	BB	BB	BB	BB	BB	BB	BB	BB	BB	BB	BB	BB	NC	BB	BB	BB	BB	AA	BB		BB	BB	BB	BB	BB	BB	BB	BB	BB	BB	BB
641	AX-89877408	BB	AA	AA	BB	AA	BB	AA	AB	AA	BB	AA	AA	AA	BB	AA	AA	AA	AA	AA	AA	AA	AA	AA	AA	AA	AA	AA	AA	AA	NC	AA	AA	AA	AB	BB	AA		AA	AA	AA	AA	AA	AA	AA	AA	AA	AA	AA
642	AX-89781751	AB	AA	AA	AB	AA	BB	AA	AB	AA	AB	AA	AA	AA	BB	AA	AA	AA	AA	AA	AA	AA	AA	AA	AA	AA	AA	AA	AA	AA	NC	AA	AA	AA	BB	AB	AA		AA	AA	AA	AA	AA	AA	AA	AA	AA	AA	AA
643	AX-89820301	BB	AA	AB	BB	AA	BB	AB	BB	AB	BB	AA	AA	AB	BB	AA	AA	AB	AA	AB	AA	AA	AB	AA	AB	AA	AB	AA	AB	AB	BB	AA	AB	AB	BB	BB	AA		AA	AA	AA	AA	AA	AB	AA	AA	AA	AA	AB
644	AX-89820303	BB	BB	BB	AB	BB	BB	BB	BB	BB	AA	BB	BB	BB	BB	BB	BB	BB	BB	BB	BB	BB	BB	BB	BB	BB	BB	BB	BB	BB	NC	BB	BB	BB	BB	BB	BB		BB	BB	BB	BB	BB	BB	BB	BB	BB	BB	BB
645	AX-89820307	AB	AA	AB	AB	AA	AB	AB	AA	AB	NC	AA	AA	NC	AB	AA	AA	AB	AA	AB	AA	AA	AB	AA	AB	AA	NC	AA	AB	AB	BB	AA	AB	AB	AA	AB	AA		AA	AA	AA	AA	AA	AB	AA	AA	AA	AA	AB
646	AX-89820328	BB	AA	AB	BB	AA	BB	AB	BB	AB	BB	AA	AA	AB	BB	AA	AA	AB	AA	AB	AA	AA	AB	AA	AA	AA	BB	AA	AB	AB	BB	AA	AB	AB	BB	BB	AA		AA	AA	AA	AA	AA	AB	AA	AA	AA	AA	AB
647	AX-89781786	BB	BB	BB	BB	BB	BB	BB	AB	BB	BB	BB	BB	BB	BB	BB	BB	BB	BB	BB	BB	BB	BB	BB	BB	BB	BB	BB	BB	BB	NC	BB	BB	BB	AB	BB	BB		BB	BB	BB	BB	BB	BB	BB	BB	BB	BB	BB
648	AX-89781791	AB	BB	BB	NC	BB	BB	BB	AB	BB	AB	BB	BB	BB	BB	BB	BB	BB	BB	BB	BB	BB	BB	BB	BB	BB	BB	BB	BB	BB	NC	BB	BB	BB	BB	AB	BB		BB	BB	BB	BB	BB	BB	BB	BB	BB	BB	BB
649	AX-89781794	AB	AA	AA	AB	AA	BB	AA	BB	AA	AA	AA	AA	AA	BB	AA	AA	AA	AA	AA	AA	AA	AA	AA	AA	AA	AA	AA	AA	AA	NC	AA	AA	AA	AB	BB	AA		AA	AA	AA	AA	AA	AA	AA	AA	AA	AA	AA
650	AX-89781808	BB	AA	AA	BB	AA	BB	AA	AB	AA	BB	AA	AA	AA	BB	AA	AA	AA	AA	AA	AA	AA	AA	AA	AA	AA	AA	AA	AA	AA	NC	AA	AA	AA	AB	BB	AA		AA	AA	AA	AA	AA	AA	AA	AA	AA	AA	AA
651	AX-89847316	AB	AA	AB	AA	AA	AB	AB	AA	AB	AB	AA	AA	AB	AB	AA	AA	AB	AA	AB	AA	AA	AB	AA	AA	AA	AB	AA	AB	AB	BB	AA	AB	AB	AB	BB	AA		AA	AA	AA	AA	AA	AB	AA	AA	AA	AA	AB
652	AX-89781816	AB	AA	NC	BB	AA	BB	AB	BB	AB	BB	AA	AA	AB	BB	AA	AA	AB	AA	AB	AA	AA	AB	AA	AA	AA	AB	AA	AB	AB	BB	AA	AB	AB	BB	BB	AA		AA	AA	AA	AA	AA	AB	AA	AA	AA	AA	AB
653	AX-89781817	AA	AA	AA	AA	AA	AA	AA	AA	AA	AA	AA	AA	AA	AB	AA	AA	AA	AA	AA	AA	AA	AA	AA	AA	AA	AA	AA	AA	AA	NC	AA	AA	AA	AA	AA	AA		AA	AA	AA	AA	AA	AA	AA	AA	AA	AA	AA
654	AX-89781828	AB	AA	AA	AB	AA	BB	AA	BB	AA	BB	AA	AA	AA	AA	AA	AA	AA	AA	AA	AA	AA	AA	AA	AA	AA	AA	AA	AA	AA	NC	AA	AA	AA	AB	AB	AA		AA	AA	AA	AA	AA	AA	AA	AA	AA	AA	AA
655	AX-89820379	AB	BB	BB	AA	BB	AA	BB	AB	BB	AB	BB	BB	BB	AB	BB	BB	BB	BB	BB	BB	BB	BB	BB	BB	BB	BB	BB	BB	BB	NC	BB	BB	BB	BB	AA	BB		BB	BB	BB	BB	BB	BB	BB	BB	BB	BB	BB
656	AX-89781835	AA	BB	AB	AB	BB	AA	AB	AB	AB	AA	BB	BB	AB	AB	BB	BB	AB	BB	AB	BB	BB	AB	BB	BB	BB	AB	BB	AB	AB	AA	BB	AB	AB	AA	AA	BB		BB	BB	BB	BB	BB	AB	BB	BB	BB	BB	AB
657	AX-89904428	AA	AA	AB	AA	AA	AA	NC	AA	AB	AA	AA	AA	AB	AA	AA	AA	AB	AA	AB	AA	AA	AB	AA	AA	AA	AB	AA	AB	AB	BB	AA	AB	AB	AA	AA	AA		AA	AA	AA	AA	AA	AB	AA	AA	AA	AA	AB
658	AX-89820397	BB	BB	BB	BB	BB	BB	BB	AB	BB	BB	BB	BB	BB	BB	BB	BB	BB	BB	BB	BB	BB	BB	BB	BB	BB	BB	BB	BB	BB	NC	BB	BB	BB	AB	BB	BB		BB	BB	BB	BB	BB	BB	BB	BB	BB	BB	BB
659	AX-89803527	AB	AA	AB	AA	AA	AB	AB	AB	AB	AA	AA	AA	AB	AA	AA	AA	AB	AA	AB	AA	AA	AB	AA	AA	AA	AB	AA	AB	AB	BB	AA	AB	AB	AA	AA	AA		AA	AA	AA	AA	AA	AB	AA	AA	AA	AA	AB
660	AX-89811647	BB	AA	AB	BB	AA	BB	AB	BB	AB	BB	AA	AA	AB	NC	AA	AA	AB	AA	AB	AA	AA	AB	AA	AA	AA	AB	AA	AB	AB	BB	AA	AB	AB	BB	BB	AA		AA	AA	AA	AA	AA	AB	AA	AA	AA	AA	AB
661	AX-89820432	AB	AA	AA	AA	AA	AA	AA	AA	AA	AA	AA	AA	AA	AA	AA	AA	AA	AA	AA	AA	AA	AA	AA	AA	AA	AA	AA	AA	AA	NC	AA	AA	AA	AB	AB	AA		AA	AA	AA	AA	AA	AA	AA	AA	AA	AA	AA
662	AX-89806658	BB	BB	NC	BB	NC	BB	BB	BB	AB	BB	BB	BB	AB	BB	BB	BB	BB	BB	NC	BB	BB	AB	BB	NC	BB	AB	BB	AB	AB	AA	BB	AB	AB	BB	BB	BB		BB	BB	BB	BB	BB	AB	BB	BB	BB	BB	BB
663	AX-89820467	BB	AA	AA	BB	AA	AA	AA	AB	AA	BB	AA	AA	AA	AB	AA	AA	AA	AA	AA	AA	AA	AA	AA	AA	AA	AA	AA	AA	AA	NC	AA	AA	AA	AB	AB	AA		AA	AA	AA	AA	AA	AA	AA	AA	AA	AA	AA
664	AX-89803533	BB	BB	BB	BB	BB	BB	BB	BB	BB	BB	BB	BB	BB	BB	BB	BB	BB	BB	BB	BB	BB	BB	BB	BB	BB	BB	BB	BB	BB	NC	BB	BB	BB	BB	BB	BB		BB	BB	BB	BB	BB	BB	BB	BB	BB	BB	BB
665	AX-89781934	AB	BB	BB	AB	BB	AA	BB	AB	BB	AB	BB	BB	BB	AB	BB	BB	BB	BB	BB	BB	BB	BB	BB	BB	BB	BB	BB	BB	BB	NC	BB	BB	BB	AA	AB	BB		BB	BB	BB	BB	BB	BB	BB	BB	BB	BB	BB
666	AX-89781948	AB	BB	BB	NC	BB	BB	BB	AB	BB	AB	BB	BB	BB	AB	BB	BB	BB	BB	BB	BB	BB	BB	BB	BB	BB	BB	BB	BB	BB	NC	BB	BB	BB	AB	AB	BB		BB	BB	BB	BB	BB	BB	BB	BB	BB	BB	BB
667	AX-89877629	AB	AA	AA	AB	AA	BB	AA	AB	AA	AB	AA	AA	AA	AB	AA	AA	AA	AA	AA	AA	AA	AA	AA	AA	AA	AA	AA	AA	AA	NC	AA	AA	AA	AB	AB	AA		AA	AA	AA	AA	AA	AA	AA	AA	AA	AA	AA
668	AX-89781950	AB	BB	BB	AB	BB	BB	BB	AB	BB	NC	BB	BB	BB	AB	BB	BB	BB	BB	BB	BB	BB	BB	BB	BB	BB	BB	BB	BB	BB	NC	BB	BB	BB	AB	AB	BB		BB	BB	BB	BB	BB	BB	BB	BB	BB	BB	BB
669	AX-89781957	AB	BB	BB	BB	BB	NC	BB	AB	BB	AB	BB	BB	BB	AB	BB	BB	BB	BB	BB	BB	BB	BB	BB	BB	BB	BB	BB	BB	BB	NC	BB	BB	BB	AB	AB	BB		BB	BB	BB	BB	BB	BB	BB	BB	BB	BB	BB
670	AX-89820521	BB	BB	AB	BB	BB	BB	AB	BB	AB	BB	BB	BB	AB	BB	BB	BB	AB	BB	AB	BB	BB	AB	BB	AB	BB	AB	AB	AB	AB	AA	BB	AB	AB	BB	BB	BB		BB	BB	BB	BB	BB	AB	BB	BB	BB	BB	AB
671	AX-89820526	AB	AA	AB	AA	AA	AB	AB	AB	AB	BB	AA	AA	AB	AA	AA	AA	AB	AA	AB	AA	AA	AB	AA	NC	AA	AB	AA	AB	AB	BB	AA	AB	AB	AB	AB	AA		AA	AA	AA	AA	AA	AB	AA	AA	AA	AA	AB
672	AX-89820527	AA	AA	AB	AA	AA	AA	AB	AA	AB	AA	AA	AA	AB	AA	AA	AA	AB	NC	AB	AA	AA	AB	NC	AB	NC	AB	AB	AB	AB	BB	AA	AB	AB	AA	AA	AA		AA	AA	AA	AA	AA	AB	AA	AA	AA	AA	AB
673	AX-89877684	BB	AA	AB	BB	AA	BB	AB	AB	AB	BB	AA	AA	AB	BB	AA	AA	AB	AA	AB	AA	AA	AB	AA	NC	AA	AB	AA	AB	NC	BB	AA	AB	AB	BB	BB	AA		AA	AA	AA	AA	AA	AB	AA	AA	AA	AA	AB
674	AX-89820559	AB	BB	BB	AB	BB	AA	BB	AB	BB	AB	BB	BB	BB	AB	BB	BB	BB	BB	BB	BB	BB	BB	BB	BB	BB	BB	BB	BB	BB	NC	BB	BB	BB	AB	AB	BB		BB	BB	BB	BB	BB	BB	BB	BB	BB	BB	BB
675	AX-89811652	AA	AB	AA	AA	AB	AA	AB	AA	AB	AA	BB	BB	AB	AA	BB	AB	AB	BB	AB	BB	BB	AB	BB	AB	BB	AB	BB	AB	AB	AA	BB	NC	AB	AA	AA	BB		AB	AB	NC	AB	AB	AB	AB	AB	AB	AB	AB
676	AX-89847332	BB	AB	AA	AA	AB	AA	AB	AB	AB	AA	BB	BB	BB	AA	BB	AB	AB	BB	AB	BB	BB	AB	BB	AB	BB	AB	BB	AB	AB	AA	BB	AB	AB	AB	AB	BB		AB	AB	NC	AB	AB	AB	AB	AB	AB	AB	AB
677	AX-89803553	BB	BB	BB	BB	BB	AB	BB	AB	BB	BB	BB	BB	BB	AB	BB	BB	BB	BB	BB	BB	BB	BB	BB	BB	BB	BB	BB	BB	BB	NC	BB	BB	BB	BB	BB	BB		BB	BB	BB	BB	BB	BB	BB	BB	BB	BB	BB
678	AX-89820583	BB	AB	BB	BB	AB	BB	AB	BB	AB	BB	AA	AA	AA	BB	AA	AB	AB	AA	AB	AA	AA	AB	AA	AB	AA	AB	AA	AB	AB	BB	AA	AB	AB	BB	BB	AA		AB	AB	NC	AB	AB	AB	AB	AB	AB	AB	AB
679	AX-89820585	BB	AB	AA	BB	AB	BB	AB	BB	AB	BB	BB	BB	BB	BB	BB	AB	AB	BB	AB	BB	BB	AB	BB	AB	BB	AB	BB	AB	AB	AA	BB	AB	AB	BB	BB	BB		AB	AB	NC	AB	AB	AB	AB	AB	AB	AB	AB
680	AX-89782011	BB	AB	AA	BB	AB	BB	NC	BB	BB	BB	BB	BB	BB	AB	BB	BB	AB	BB	BB	BB	BB	AB	BB	BB	BB	BB	BB	BB	AB	AB	BB	BB	AB	BB	BB	BB		AB	AB	NC	AB	AB	AB	AB	AB	AB	AB	AB
681	AX-89782032	AB	AA	AA	AA	AA	BB	AA	AB	AA	AB	AA	AA	AA	AB	AA	AA	AA	AA	AA	AA	AA	AA	AA	AA	AA	AA	AA	AA	AA	NC	AA	AA	AA	AB	AB	AA		AA	AA	AA	AA	AA	AA	AA	AA	AA	AA	AA
682	AX-89782033	AB	BB	BB	AA	BB	BB	BB	AB	BB	AB	BB	BB	BB	AB	BB	BB	BB	BB	BB	BB	BB	BB	BB	BB	BB	BB	BB	BB	BB	NC	BB	BB	BB	AB	AB	BB		BB	BB	BB	BB	BB	BB	BB	BB	BB	BB	BB
683	AX-89820638	AA	AB	BB	AA	AB	AA	AB	AB	AA	AA	AA	AA	AA	AA	AA	AA	AB	AA	NC	AA	AA	AB	AA	AA	AA	AA	AA	AA	AB	AB	AA	AA	AB	AA	AA	AA		AB	AB	NC	AB	AB	AB	AB	AB	AB	AB	AB
684	AX-89782067	AB	AA	AA	BB	AA	AA	AA	AB	AA	AB	AA	AA	AA	AB	AA	AA	AA	AA	AA	AA	AA	AA	AA	AA	AA	AA	AA	AA	AA	NC	AA	AA	AA	AB	AB	AA		AA	AA	AA	AA	AA	AA	AA	AA	AA	AA	AA
685	AX-89820690	AA	BB	BB	AA	BB	AB	BB	AA	BB	AA	BB	BB	BB	AA	BB	BB	BB	BB	BB	BB	BB	BB	BB	BB	BB	BB	BB	BB	BB	NC	BB	BB	BB	AA	BB	BB		BB	BB	BB	BB	BB	BB	BB	BB	BB	BB	BB
686	AX-89783142	BB	BB	BB	BB	BB	BB	BB	BB	BB	BB	BB	BB	BB	BB	BB	BB	BB	BB	BB	BB	BB	BB	BB	BB	BB	BB	BB	BB	BB	NC	BB	BB	BB	AB	AB	BB		BB	BB	BB	BB	BB	BB	BB	BB	BB	BB	BB
687	AX-89783212	AB	AA	AA	BB	AA	AA	AA	AB	AA	AB	AA	AA	AA	AB	AA	AA	AA	AA	AA	AA	AA	AA	AA	AA	AA	AA	AA	AA	AA	NC	AA	AA	AA	AB	AB	AA		AA	AA	AA	AA	AA	AA	AA	AA	AA	AA	AA
688	AX-89822389	AB	BB	BB	AB	BB	BB	BB	BB	BB	BB	BB	BB	BB	AA	BB	BB	BB	BB	BB	BB	BB	BB	BB	BB	BB	BB	BB	BB	BB	NC	BB	BB	BB	AB	AB	BB		BB	BB	BB	BB	BB	BB	BB	BB	BB	BB	BB
689	AX-89822391	AB	BB	BB	BB	BB	AA	BB	AB	BB	AB	BB	BB	BB	AB	BB	BB	BB	BB	BB	BB	BB	BB	BB	BB	BB	BB	BB	BB	BB	NC	BB	BB	BB	BB	AB	BB		BB	BB	BB	BB	BB	BB	BB	BB	BB	BB	BB
690	AX-89820978	AB	BB	BB	AB	AB	AA	BB	AB	BB	AB	BB	BB	AB	AB	BB	BB	BB	BB	AB	BB	BB	BB	AB	BB	BB	BB	BB	BB	BB	NC	BB	AB	BB	AB	AB	BB		BB	BB	BB	BB	BB	BB	BB	BB	BB	BB	BB
691	AX-89878087	AB	AB	AB	AA	BB	AA	AB	AA	AB	AA	AB	AB	AB	AA	NC	AB	AA	AA	AB	AB	AB	AB	AB	BB	AB	AA	AA	AA	AB	AB	AA	AB	AB	AA	AB	AB		AB	BB	AB	BB	AB	AB	BB	AB	BB	BB	AB
692	AX-89782248	AA	AB	BB	AA	AB	AA	BB	AA	BB	AA	AB	BB	AB	AB	AB	AB	AB	NC	AB	BB	BB	BB	AB	BB	NC	NC	AB	AB	AB	AB	AB	AB	AB	AA	AA	AB		BB	BB	BB	BB	BB	BB	BB	NC	BB	BB	BB
693	AX-89820883	BB	AB	AB	BB	AB	BB	AB	BB	AB	BB	AB	AB	BB	BB	BB	AB	BB	BB	BB	AB	AB	AB	BB	AA	AB	BB	BB	BB	AB	BB	BB	BB	BB	AB	AB	AB		AB	AA	AB	AA	AB	AB	AA	AB	AA	AA	AB
694	AX-89820874	BB	AB	AB	BB	AB	BB	AB	BB	AB	AB	AB	AB	BB	AA	BB	AB	BB	BB	BB	AB	AB	AB	BB	AA	AB	BB	BB	BB	AB	BB	BB	BB	BB	AB	AB	AB		AB	AA	AB	AA	AB	AB	AA	AB	AA	NC	AB
695	AX-89820871	AB	AB	AA	BB	AB	BB	AA	BB	AA	BB	AB	AA	AB	BB	AB	AB	NC	NC	BB	AA	AA	AA	BB	AA	AB	AB	BB	AB	AB	AB	AB	AB	AB	BB	AB	AB		AA	AA	AA	AA	AA	AA	AA	NC	AA	AA	AA
696	AX-89782205	BB	AB	AB	BB	AB	BB	AB	BB	AB	BB	AB	AB	BB	AB	BB	AB	BB	BB	BB	AB	AB	AB	BB	AA	AB	BB	BB	BB	AB	BB	BB	BB	BB	BB	BB	AB		AB	AA	BB	AA	AB	AB	AA	AB	AA	NC	AB
697	AX-89820822	AA	AA	AA	AB	BB	AB	NC	BB	AA	AA	AA	AA	AB	AB	AA	AA	AA	AA	AB	AA	AA	AA	AB	AA	AA	AA	AA	AA	AA	NC	AA	AB	AA	AB	BB	AA		AA	AA	AA	AA	AA	AA	AA	AA	AA	AA	AA
698	AX-89820818	AA	AA	AA	BB	AB	AA	AA	AB	AA	AA	AA	AA	AB	AA	AA	AA	AA	AA	NC	AA	AA	AA	AB	AA	AA	AA	AA	AA	AA	NC	AA	AB	AA	AA	AA	AA		AA	AA	AA	AA	AA	AA	AA	AA	AA	AA	AA
699	AX-89820781	BB	BB	BB	AA	AA	AA	BB	BB	BB	AA	BB	BB	AB	AA	BB	BB	BB	BB	AB	BB	BB	BB	AB	BB	BB	BB	BB	BB	BB	AB	BB	AB	BB	AA	AB	BB		BB	BB	BB	BB	BB	BB	BB	BB	BB	BB	BB
700	AX-89782165	BB	AB	BB	AA	AB	AB	BB	AA	BB	AB	AB	BB	AB	NC	AB	AB	AB	AB	AA	BB	BB	BB	AA	BB	AB	AB	AA	AB	AB	AB	AB	AB	BB	AA	AB	AB		BB	BB	BB	BB	BB	BB	BB	NC	BB	BB	BB
701	AX-89820752	AB	AB	AB	BB	AB	BB	NC	AB	AB	BB	AB	AB	BB	BB	BB	AB	BB	BB	BB	AB	AB	AB	BB	AA	AB	BB	BB	BB	AB	BB	BB	BB	BB	BB	AA	AB		AB	AB	BB	AB	AB	AB	AB	AB	AB	AB	AB
702	AX-89782150	AA	BB	BB	AA	AB	AA	BB	AA	BB	AA	BB	BB	AB	AB	NC	BB	BB	BB	AB	BB	BB	BB	AB	BB	BB	BB	BB	BB	BB	AB	BB	NC	BB	AA	AA	BB		BB	BB	BB	BB	BB	BB	BB	BB	BB	BB	BB
703	AX-89877878	AA	BB	BB	AB	AB	AB	BB	AB	BB	AA	BB	BB	AB	AB	BB	BB	BB	BB	AB	BB	BB	BB	AB	BB	BB	BB	BB	BB	BB	NC	BB	AB	BB	AB	BB	BB		BB	BB	BB	BB	BB	BB	BB	BB	BB	BB	BB
704	AX-89820733	AA	AB	AB	AA	AB	AA	AB	AA	AB	AA	AB	AB	AA	AA	AA	AB	AA	AA	AA	AB	AB	AB	AA	AB	AB	AA	AA	AA	AB	AA	AA	AA	AA	AA	AA	AB		AB	NC	AA	BB	AB	AB	BB	AB	BB	NC	AB
705	AX-89782106	BB	BB	BB	BB	AB	AB	BB	BB	BB	NC	BB	BB	AB	BB	BB	BB	BB	BB	AB	BB	BB	BB	AB	BB	BB	BB	BB	BB	BB	NC	BB	AB	BB	BB	BB	BB		BB	BB	BB	BB	BB	BB	BB	BB	BB	BB	BB
706	AX-89782305	AA	AA	AA	AB	AB	AB	AA	BB	AA	AA	AA	AA	AB	AB	AA	AA	AA	AA	AB	AA	AA	AA	AB	AA	AA	AA	AA	AA	AA	NC	AA	AB	AA	AB	BB	AA		AA	AA	AA	AA	AA	AA	AA	AA	AA	AA	AA
707	AX-89782823	AA	AB	AA	AA	AB	AA	AA	AB	AA	AA	AB	AA	AB	AA	AB	AB	NC	AB	AB	AA	AA	AA	AB	AA	AB	AB	AB	AB	AB	NC	AB	AB	AA	BB	AB	AB		AA	AA	AA	AA	AA	AA	AA	NC	AA	AA	AA
708	AX-89782814	BB	BB	BB	BB	AB	AB	BB	BB	BB	BB	BB	BB	AB	BB	BB	BB	BB	BB	AB	BB	BB	BB	AB	BB	BB	BB	BB	BB	BB	AB	BB	AB	BB	BB	BB	BB		BB	BB	BB	BB	BB	BB	BB	BB	BB	BB	BB
709	AX-89782811	AB	BB	BB	BB	AB	AA	BB	AB	BB	AB	BB	BB	AB	AB	BB	BB	BB	BB	AB	BB	BB	BB	AB	BB	BB	BB	BB	BB	BB	NC	BB	AB	BB	AB	AB	BB		BB	BB	BB	BB	BB	BB	BB	BB	BB	BB	BB
710	AX-89821722	AB	BB	BB	BB	AA	BB	BB	BB	BB	BB	BB	BB	AB	BB	BB	BB	BB	BB	AB	BB	BB	BB	AB	BB	BB	BB	BB	BB	BB	NC	BB	AB	BB	AB	AA	BB		BB	BB	BB	BB	BB	BB	BB	BB	BB	BB	BB
711	AX-89782803	AA	AA	AA	AA	BB	AA	AB	AA	AB	AA	AA	AB	AB	AA	AA	AB	AA	AA	AB	AB	AA	AA	AB	BB	AB	AA	AA	AA	AA	AB	AA	AB	AA	AA	AA	AB		AB	NC	AA	NC	AB	AB	NC	AB	NC	NC	AB
712	AX-89782796	BB	AA	AA	AB	AA	AB	NC	AB	AA	BB	AA	AA	AA	AB	AA	AA	AA	AA	AA	AA	AA	AA	AA	AA	AA	AA	AA	AA	AA	NC	AA	AA	AA	AB	AA	AA		AA	AA	AA	AA	AA	AA	AA	AA	AA	AA	AA
713	AX-89821706	AB	AB	AB	AB	BB	AB	AB	BB	AB	AA	AB	AB	AB	AA	AA	AB	AA	AA	AB	AB	AB	AB	AB	BB	AB	AA	AA	AA	AB	AB	AA	AB	AA	AA	AA	AB		AB	BB	AA	BB	AB	AB	BB	AB	BB	BB	AB
714	AX-89782793	AB	BB	AB	AB	BB	AB	AB	AA	AB	AA	BB	AB	AB	AA	AB	BB	AB	AB	BB	AB	AB	AB	BB	BB	BB	AB	BB	AB	BB	AB	AB	AB	AA	AA	AA	BB		AB	BB	AA	BB	AB	AB	BB	BB	BB	BB	AB
715	AX-89878848	AA	AA	AA	AA	AA	AA	AA	AA	AA	AA	AA	AA	AA	AA	AA	AA	AA	AA	AA	AA	AA	AA	AA	AA	AA	AA	AA	AA	AA	NC	AA	AA	AA	AB	AB	AA		AA	AA	AA	AA	AA	AA	AA	AA	AA	AA	AA
716	AX-89806735	AA	AA	AB	AA	AA	AA	AB	AA	AA	NC	AA	AB	AB	AA	AB	AA	AB	AB	AA	AB	AB	AB	AA	AA	AA	AB	AA	AB	AA	AB	AB	AB	BB	AA	AA	AA		AB	AA	BB	AA	AB	AB	AA	AA	AA	AA	AB
717	AX-89878761	BB	BB	AB	BB	BB	BB	AB	BB	BB	NC	BB	AB	AB	AB	AB	BB	AB	AB	BB	AB	AB	AB	BB	BB	BB	AB	BB	AB	BB	AB	AB	AB	AA	NC	AB	BB		AB	BB	AA	BB	AB	AB	BB	BB	BB	BB	AB
718	AX-89821608	AB	AB	AB	AB	AA	AB	AB	BB	AA	AB	AB	AB	AB	AB	BB	AB	BB	BB	AB	AB	AB	AB	AB	AA	AB	BB	BB	BB	AB	AB	BB	AB	BB	BB	AB	AB		AB	AA	BB	AA	AB	AB	AA	AB	AA	AA	AB
719	AX-89782713	AA	AB	AB	AA	BB	AA	AB	AA	BB	AA	AB	AB	AB	AA	AA	AB	AA	AA	AB	AB	AB	AB	AB	BB	AB	AA	AA	AA	AB	AB	AA	AB	AA	AA	AA	AB		AB	BB	AA	BB	AB	AB	BB	AB	BB	BB	AB
720	AX-89867719	BB	NC	AB	AA	BB	AA	AB	AA	BB	AA	BB	AB	AB	AA	AB	BB	AB	AB	BB	AB	AB	AB	BB	BB	BB	AB	BB	AB	BB	AB	AB	AB	AA	AA	AA	BB		AB	BB	AA	BB	AB	AB	BB	BB	BB	BB	AB
721	AX-89782699	AB	AA	AA	AA	AA	BB	AA	AB	AA	AB	AA	AA	AA	AB	AA	AA	AA	AA	AA	AA	AA	AA	AA	AA	AA	AA	AA	AA	AA	NC	AA	AA	AA	AB	AB	AA		AA	AA	AA	AA	AA	AA	AA	AA	AA	AA	AA
722	AX-89782698	AA	AB	AB	AA	BB	AA	AB	AA	BB	AA	AB	AB	AB	AA	AA	AB	AA	AA	AB	AB	AB	AB	AB	BB	AB	AA	AA	AA	AB	AB	AA	AB	AA	AA	AA	AB		AB	BB	AA	BB	AB	AB	BB	AB	BB	BB	AB
723	AX-89782697	AA	AA	AA	AA	AA	AA	AA	AB	AA	AA	AA	AA	AA	AB	AA	AA	AA	AA	AA	AA	AA	AA	AA	AA	AA	AA	AA	AA	AA	NC	AA	AA	AA	AB	AA	AA		AA	AA	AA	AA	AA	AA	AA	AA	AA	AA	AA
724	AX-89872344	BB	BB	AB	AB	BB	AA	AB	AA	BB	AA	BB	AB	AB	AB	AB	BB	AB	AB	BB	AB	AB	AB	BB	BB	BB	AB	BB	AB	BB	AB	AB	AB	AA	AA	AA	BB		AB	BB	AA	BB	AB	AB	BB	BB	BB	BB	AB
725	AX-89821589	AB	BB	AB	AB	BB	AA	AB	BB	BB	AA	BB	AB	AB	AA	AB	BB	AB	AB	BB	AB	AB	AB	NC	BB	BB	AB	BB	AB	BB	AB	AB	AB	AB	AA	AA	BB		AB	BB	AA	BB	AB	AB	BB	BB	BB	BB	AB
726	AX-89904518	BB	AB	AB	BB	AA	BB	AB	AB	AA	BB	AB	AB	AB	BB	BB	AB	BB	BB	AB	AB	AB	AB	AB	AA	AB	BB	BB	AB	AB	AB	BB	AB	BB	BB	BB	AB		AB	AA	BB	AA	AB	AB	AA	AB	AA	AA	AB
727	AX-89821569	AB	BB	AB	AB	BB	AA	AB	AB	BB	AA	BB	AB	AB	AA	NC	BB	AB	AA	BB	AB	AB	AB	BB	BB	BB	AB	BB	BB	BB	AB	AB	AB	AA	AA	AA	BB		AB	BB	AA	BB	AB	AB	BB	BB	BB	BB	AB
728	AX-89821570	AB	BB	AB	BB	BB	BB	AB	BB	BB	BB	BB	AB	AB	AB	AB	BB	AB	AB	BB	AB	AB	AB	BB	BB	BB	AB	BB	BB	BB	AB	AB	AB	AA	BB	BB	BB		AB	BB	AA	BB	AB	AB	BB	BB	BB	BB	AB
729	AX-89782680	AA	AB	NC	AA	AA	AA	AB	AA	AA	AA	AB	AB	AB	AA	BB	AB	BB	BB	AB	AB	AB	AB	AB	AB	AB	BB	BB	AB	AB	AB	BB	AB	BB	AA	AA	AB		AB	AA	BB	AA	AB	AB	AA	AB	AA	AA	AB
730	AX-89821563	AB	AB	AB	AB	AB	BB	AA	AA	NC	BB	AB	AB	AB	BB	AA	AB	AA	AA	AB	AB	AB	AB	AB	BB	AB	AA	AA	AB	AB	AB	AA	AB	AA	AB	NC	AB		AB	BB	AA	BB	AB	AB	BB	AB	BB	BB	AB
731	AX-89782678	AA	BB	BB	AB	BB	AA	BB	AA	BB	AA	BB	BB	BB	AB	BB	BB	BB	BB	BB	BB	BB	BB	BB	BB	BB	BB	BB	BB	BB	NC	BB	BB	BB	AB	AB	BB		BB	BB	BB	BB	BB	BB	BB	BB	BB	BB	BB
732	AX-89878664	BB	AA	AA	AB	AA	BB	AA	BB	AA	BB	AA	AA	AA	AB	AA	AA	AA	AA	AA	AA	AA	AA	AA	AA	AA	AA	AA	AA	AA	NC	AA	AA	AA	AB	AB	AA		AA	AA	AA	AA	AA	AA	AA	AA	AA	AA	AA
733	AX-89821517	AB	AB	AB	AB	BB	AA	AB	AB	BB	AA	AB	AB	AA	AA	AA	AB	AA	AA	AB	AB	BB	AB	AB	NC	AB	AA	AA	AB	AB	AB	AA	BB	AA	AB	AB	AB		AB	BB	AB	BB	AB	AB	BB	AB	BB	BB	AB
734	AX-89878657	AB	BB	BB	AB	BB	BB	BB	AB	BB	AB	BB	BB	BB	AB	BB	BB	BB	BB	BB	BB	BB	BB	BB	BB	BB	BB	BB	BB	BB	NC	BB	BB	BB	AB	AB	BB		BB	BB	BB	BB	BB	BB	BB	BB	BB	BB	BB
735	AX-89782645	AA	BB	BB	AA	BB	AA	AB	AA	AB	AA	AB	AB	BB	NC	BB	BB	BB	BB	AB	AB	AA	AB	AB	AB	AB	BB	BB	AB	AB	AB	BB	AA	BB	AA	AA	AB		BB	AB	AB	AB	BB	AB	AB	BB	AB	AB	AB
736	AX-89821506	AA	BB	BB	AA	BB	AA	AB	AA	AB	AA	AB	AB	BB	AA	BB	BB	BB	BB	AB	AB	AA	AB	AB	AB	AB	BB	BB	AB	AB	AB	BB	AA	BB	AB	AB	AB		BB	AB	AB	AB	BB	AB	AB	BB	AB	AB	AB
737	AX-89821488	AB	BB	BB	AA	BB	AA	AB	AA	AB	AA	AB	AB	BB	AA	BB	BB	BB	BB	AB	AB	AA	AB	AB	AB	AB	BB	BB	AB	AB	AB	BB	AA	BB	AA	AA	AB		BB	AB	AB	AB	BB	AB	AB	BB	AB	AB	AB
738	AX-89847395	AB	BB	BB	BB	BB	AB	AB	BB	AB	AB	AB	AB	BB	AB	BB	BB	BB	BB	AB	AB	AA	AB	AB	AB	AB	BB	BB	AB	AB	AB	BB	AA	BB	AB	AA	AB		BB	AB	AB	AB	BB	AB	AB	BB	AB	AB	AB
739	AX-89821441	AA	BB	BB	AB	BB	AA	BB	AB	BB	AA	BB	BB	BB	AB	BB	BB	BB	BB	BB	BB	BB	BB	BB	BB	BB	BB	BB	BB	BB	NC	BB	BB	BB	BB	AB	BB		BB	BB	BB	BB	BB	BB	BB	BB	BB	BB	BB
740	AX-89782602	AB	BB	BB	AB	BB	BB	BB	BB	BB	AB	BB	BB	BB	AB	BB	BB	BB	BB	BB	BB	BB	BB	BB	BB	BB	BB	BB	BB	BB	NC	BB	BB	BB	AB	BB	BB		BB	BB	BB	BB	BB	BB	BB	BB	BB	BB	BB
741	AX-89821434	AB	AA	AA	AB	AA	AA	AA	AA	AA	AB	AA	AA	AA	AB	AA	AA	AA	AA	AA	AA	AA	AA	AA	AA	AA	AA	AA	AA	AA	NC	AA	AA	AA	AB	AA	AA		AA	AA	AA	AA	AA	AA	AA	AA	AA	AA	AA
742	AX-89867715	AA	AA	AA	AA	AB	AB	AB	AA	AB	AA	BB	AB	AB	AA	AB	AA	AA	NC	BB	AB	BB	AB	BB	AB	AB	AB	BB	BB	BB	AB	AB	BB	AA	BB	AB	BB		AA	AB	AB	AB	AA	AB	AB	AB	AB	AB	AA
743	AX-89782577	AA	BB	BB	AA	BB	AA	BB	AA	BB	AA	BB	BB	BB	AA	BB	BB	BB	BB	BB	BB	BB	BB	BB	BB	BB	BB	BB	BB	BB	NC	BB	BB	BB	AA	AA	BB		BB	BB	BB	BB	BB	BB	BB	BB	BB	BB	BB
744	AX-89860842	BB	BB	BB	BB	BB	BB	BB	AB	BB	BB	BB	BB	BB	BB	BB	BB	BB	BB	BB	BB	BB	BB	BB	BB	BB	BB	BB	BB	BB	NC	BB	BB	BB	BB	BB	BB		BB	BB	BB	BB	BB	BB	BB	BB	BB	BB	BB
745	AX-89821399	AB	BB	BB	AB	BB	AA	BB	AA	BB	AB	BB	BB	BB	AB	BB	BB	BB	BB	BB	BB	BB	BB	BB	BB	BB	BB	BB	BB	BB	NC	BB	BB	BB	AB	AA	BB		BB	BB	BB	BB	BB	BB	BB	BB	BB	BB	BB
746	AX-89878533	BB	BB	BB	AB	BB	BB	BB	AB	BB	AB	BB	BB	BB	NC	BB	BB	BB	BB	BB	BB	BB	BB	BB	NC	BB	BB	BB	BB	BB	NC	BB	BB	BB	NC	AB	BB		BB	BB	BB	BB	BB	BB	BB	BB	BB	BB	BB
747	AX-89821388	BB	AA	AA	AB	AA	BB	AA	AB	AA	AB	AA	AA	AA	AB	AA	AA	AA	AA	AA	AA	AA	AA	AA	AA	AA	AA	AA	AA	AA	NC	AA	AA	AA	AB	AB	AA		AA	AA	AA	AA	AA	AA	AA	AA	AA	AA	AA
748	AX-89782557	AA	BB	BB	BB	BB	AA	BB	AB	BB	AB	BB	BB	BB	AB	BB	BB	BB	BB	BB	BB	BB	BB	BB	BB	BB	BB	BB	BB	BB	NC	BB	BB	BB	AB	AB	BB		BB	BB	BB	BB	BB	BB	BB	BB	BB	BB	BB
749	AX-89821384	AB	AA	AA	AB	AB	AA	AB	AB	AB	AB	BB	AB	AB	BB	AB	AA	AA	AB	BB	AB	BB	AB	BB	AB	AB	AB	BB	BB	BB	AB	AB	BB	AA	AB	BB	BB		AA	AB	AB	AB	AA	AB	AB	AB	AB	AB	AA
750	AX-89782537	BB	AA	AA	AB	AA	BB	AA	AB	AA	AB	AA	AA	AA	AB	AA	AA	AA	AA	AA	AA	AA	AA	AA	AA	AA	AA	AA	AA	AA	NC	AA	AA	AA	AB	AB	AA		AA	AA	AA	AA	AA	AA	AA	AA	AA	AA	AA
751	AX-89782534	AB	AA	AA	BB	AA	BB	AA	BB	AA	BB	AA	AA	AA	BB	AA	AA	AA	AA	AA	AA	AA	AA	AA	AA	AA	AA	AA	AA	AA	NC	AA	AA	AA	BB	BB	AA		AA	AA	AA	AA	AA	AA	AA	AA	AA	AA	AA
752	AX-89847383	AB	AA	AA	BB	NC	AB	AB	BB	AA	AB	BB	AB	AB	AB	AB	AA	AA	AB	BB	AB	BB	AB	BB	AB	AB	NC	BB	BB	BB	AB	AB	BB	AA	AA	AB	BB		AA	AB	AB	AB	AA	AB	AB	AB	AB	AB	AA
753	AX-89782492	BB	BB	BB	AB	BB	BB	BB	AB	BB	AB	AB	BB	AB	AB	AB	BB	BB	AB	AB	BB	BB	BB	BB	BB	BB	AB	AB	AB	AB	NC	AB	BB	BB	AB	AB	AB		BB	BB	BB	BB	BB	BB	BB	NC	BB	BB	BB
754	AX-89821230	AA	AA	AA	AA	AA	AA	AB	AA	AA	AA	BB	AB	AB	NC	AB	AA	AA	AB	AB	AB	BB	AB	BB	AB	AB	AB	AB	BB	AA	AB	AB	BB	AA	AA	AA	AB		AA	AB	NC	NC	AA	AB	AB	AA	AB	AB	AA
755	AX-89782455	AB	BB	BB	BB	AB	BB	AB	BB	BB	BB	AA	AB	AB	BB	AB	BB	BB	AB	AB	AB	AA	AB	AA	AB	AB	AB	AB	AA	BB	AB	AB	AA	BB	BB	BB	AB		BB	AB	NC	AB	BB	AB	AB	BB	AB	AB	BB
756	AX-89878328	AA	AA	AA	BB	AA	AB	AB	AB	AA	BB	BB	AB	AB	BB	AB	AA	AA	AB	AB	AB	BB	AB	BB	AB	NC	AB	AB	BB	AA	AB	AB	BB	AA	AB	AB	AB		AA	AB	NC	AB	AA	AB	AB	AA	AB	AB	AA
757	AX-89782416	BB	AA	AA	AA	AA	AB	AB	AA	AA	AB	AB	AB	AA	NC	AA	AA	AA	AA	AB	AB	BB	AB	AB	AB	AB	AA	AA	AB	AA	AB	AA	BB	AA	AA	AB	AB		AA	AB	NC	AB	AA	AB	AB	AA	AB	AB	AA
758	AX-89878274	BB	BB	BB	AB	BB	BB	AB	AB	BB	AB	AA	AB	AB	AB	AB	BB	BB	AB	AB	AB	AA	AB	AA	AB	AB	AB	AB	AA	BB	AB	AB	AA	BB	AB	AB	AB		BB	AB	NC	AB	BB	AB	AB	BB	AB	AB	BB
759	AX-89782408	AB	BB	BB	AB	BB	AB	AB	AA	BB	NC	AA	AB	AB	AA	AB	BB	BB	AB	AB	AB	AA	AB	AA	AB	AB	NC	AB	AA	BB	AB	AB	AA	BB	AA	AA	AB		BB	AB	NC	AB	BB	AB	AB	BB	AB	AB	BB
760	AX-89821143	AA	AA	AA	AA	AA	AA	AB	NC	AA	AA	BB	AB	AB	BB	AB	AA	AA	AB	AB	AB	BB	AB	BB	AB	AB	AB	AB	BB	AA	AB	AB	BB	AA	AA	AA	AB		AA	AB	NC	AB	AA	NC	AB	AA	AB	AB	AA
761	AX-89782387	BB	AA	AA	BB	AA	BB	AB	BB	AA	BB	BB	AB	AB	BB	AB	AA	AA	AB	AB	AB	BB	AB	BB	AB	AB	AB	AB	BB	AA	AB	AB	BB	AA	BB	BB	AB		AA	AB	NC	AB	AA	AB	AB	AA	AB	AB	AA
762	AX-89821117	AB	AA	AA	BB	AA	BB	AB	AB	AA	BB	BB	AB	AB	AA	AB	AA	AA	AB	AB	AB	BB	AB	BB	AB	AB	AB	AB	BB	AA	AB	AB	BB	AA	BB	BB	AB		AA	AB	NC	AB	AA	AB	AB	AA	AB	AB	AA
763	AX-89878229	AB	AA	AA	BB	AB	AB	AB	AB	AA	BB	BB	AA	AB	BB	AB	AA	AA	AA	AA	AA	BB	AB	AB	AA	AA	AA	AA	AB	NC	AA	AB	AB	AB	BB	AA	AA		AA	NC	NC	NC	AA	NC	NC	AA	NC	NC	AA
764	AX-89821094	BB	BB	BB	BB	AB	BB	BB	AB	BB	BB	AA	BB	AB	BB	AB	BB	BB	BB	BB	BB	AA	AB	AB	BB	BB	BB	BB	AB	BB	BB	AB	AB	BB	BB	BB	BB		BB	NC	NC	NC	BB	NC	NC	BB	NC	NC	BB
765	AX-89878221	AA	AA	AA	AA	AA	AA	AB	AB	AA	AA	BB	AB	AB	AA	AB	AA	AA	AB	AB	AB	BB	AB	NC	AB	NC	AB	AB	AB	AA	AB	AB	BB	AA	AA	AA	AB		AA	NC	NC	AB	AA	AB	AB	AA	AB	AB	AA
766	AX-89821081	AA	AA	AA	AA	AA	AA	AB	AB	AA	AA	BB	AB	AB	AA	AB	AA	AA	AB	AB	AB	BB	AB	BB	AB	AB	AB	AB	BB	AA	AB	AB	BB	AA	AA	AA	AB		AA	AB	NC	AB	AA	AB	AB	AA	AB	AB	AA
767	AX-89782362	AB	BB	BB	AB	BB	AB	AB	BB	BB	BB	AB	AB	BB	BB	BB	BB	BB	NC	AB	AB	AA	AB	AB	AB	AB	BB	AB	AB	BB	AB	BB	AA	BB	BB	BB	AB		BB	AB	NC	AB	BB	AB	AB	BB	AB	AB	BB
768	AX-89815331	AB	AA	AA	AB	AA	AB	AB	NC	AA	AA	AB	AB	AA	NC	AA	AA	AA	AA	AB	AB	BB	AB	AB	AB	AB	AA	AA	AB	AA	AB	AA	BB	AA	AB	AB	AB		AA	AB	NC	AB	AA	AB	AB	AA	AB	AB	AA
769	AX-89878147	BB	BB	BB	BB	BB	BB	AB	BB	BB	BB	AA	AB	AB	BB	AB	BB	BB	AB	AB	AB	AA	AB	AA	AB	AB	AB	AB	AA	BB	AB	AB	AA	BB	BB	BB	AB		BB	AB	NC	AB	BB	AB	AB	BB	AB	AB	BB
770	AX-89821008	AA	AA	AA	AA	AA	AA	AB	AB	AA	AA	BB	AB	AB	NC	AB	AA	AA	AB	AB	AB	BB	AB	BB	AB	AB	AB	AB	BB	AA	AB	AB	BB	AA	AA	AA	AB		AA	AB	NC	AB	AA	AB	AB	AA	AB	AB	AA
771	AX-89811689	AB	AA	NC	BB	AA	AB	AA	BB	AA	NC	AB	AB	AA	AB	AA	AA	AA	AA	AB	AB	BB	AB	BB	BB	AB	AA	AA	AB	AA	AB	AA	AB	AA	NC	AB	AB		AA	AB	AB	AB	AA	AB	AB	AA	AB	AB	AA
772	AX-89811687	BB	BB	BB	BB	NC	AB	AB	BB	BB	BB	AA	AB	AB	BB	AB	BB	BB	AB	AB	AB	AA	AB	AA	AB	AB	AB	AB	AA	BB	AB	AB	AA	BB	AA	NC	AB		BB	AB	NC	AB	BB	AB	AB	BB	AB	AB	BB
773	AX-89783007	BB	BB	BB	BB	BB	BB	AB	BB	BB	BB	AA	AB	AB	BB	AB	BB	BB	AB	AB	AB	AA	AB	AA	AB	AB	AB	AB	AA	BB	AB	AB	AA	BB	BB	BB	AB		BB	AB	NC	AB	BB	AB	AB	BB	AB	AB	BB
774	AX-89821971	AB	AA	AA	AA	AA	AB	AB	AB	AA	AA	BB	AB	AB	AA	AB	AA	AA	AB	AB	AB	BB	AB	BB	AB	AB	AB	AB	BB	AA	AB	AB	BB	AA	AA	BB	AB		AA	AB	NC	AB	AA	AB	AB	AA	AB	AB	AA
775	AX-89782956	AB	BB	BB	AB	BB	BB	AB	AB	BB	AB	AA	AB	AB	BB	AB	BB	BB	AB	AB	AB	AA	AB	AA	AB	AB	AB	AB	AA	BB	AB	AB	AA	BB	AB	AB	AB		BB	AB	NC	AB	BB	AB	AB	BB	AB	AB	BB
776	AX-89782950	AA	AA	NC	AA	AA	AB	AB	AA	AA	AA	BB	AB	AB	AB	AB	AA	AA	AB	AB	AB	BB	AB	BB	AB	AB	AB	AB	BB	AA	AB	AB	BB	AA	AA	AA	AB		AA	AB	BB	AB	AA	AA	AB	AA	AB	AB	AA
777	AX-89847435	BB	AA	AA	AB	AA	BB	AB	AB	AA	AB	BB	AA	AB	AB	AB	AA	AA	AB	AB	AB	BB	AB	BB	AB	AB	AA	AB	BB	AA	AB	AB	AB	AA	BB	BB	AB		AA	NC	AA	NC	AA	AA	NC	AA	AA	NC	AA
778	AX-89782901	AA	BB	BB	AA	BB	AA	AB	AA	BB	AA	AA	AB	AB	AA	AB	BB	BB	AB	AB	AB	AA	AB	AA	AB	AB	AB	AB	AA	BB	AB	AB	AA	BB	AA	AA	AB		BB	AB	NC	AB	BB	BB	AB	BB	AB	AB	BB
779	AX-89821860	BB	AA	AA	BB	AA	BB	AA	BB	AA	BB	BB	AB	AB	AB	AB	AA	AA	AB	AB	AB	BB	AB	BB	AB	AB	AB	AB	BB	NC	NC	AA	BB	AA	BB	BB	AB		AA	AB	NC	AB	AA	NC	NC	AA	NC	AB	AA
780	AX-89821854	BB	AA	AA	BB	AA	BB	AB	BB	AA	BB	BB	AB	AB	BB	AB	AA	AA	AB	AB	AB	BB	AB	BB	AB	AB	AB	AB	BB	AA	AB	AB	BB	AA	BB	BB	AB		AA	AB	NC	AB	AA	AA	AB	AA	AB	AB	AA
781	AX-89821837	AA	BB	BB	AA	BB	AA	AB	AA	BB	AA	AA	AB	AB	AA	AB	BB	BB	AB	AB	AB	AA	AB	AA	AB	AB	AB	AB	AA	BB	AB	AB	AA	BB	AA	AA	AB		BB	AB	NC	AB	BB	BB	AB	BB	AB	AB	BB
782	AX-89821823	BB	BB	BB	BB	BB	BB	AB	BB	BB	BB	AB	AB	BB	BB	BB	BB	BB	BB	AB	AB	AA	AB	AA	AB	AB	BB	BB	AB	BB	AB	BB	AA	BB	BB	BB	AB		BB	AB	NC	AB	BB	BB	AB	BB	AB	AB	BB
783	AX-89847430	AB	BB	BB	AA	BB	AB	AB	AA	BB	AB	AB	AB	BB	AB	BB	BB	BB	BB	AB	AB	AA	AB	AA	AB	AB	BB	BB	AB	BB	AB	BB	AA	BB	BB	AB	AB		BB	AB	NC	AB	BB	BB	AB	BB	AB	AB	BB
784	AX-89821815	AB	BB	BB	BB	BB	BB	NC	BB	BB	BB	AA	AB	AB	BB	AB	BB	BB	AB	AB	AB	AA	AB	AA	AB	AB	AB	AB	AA	BB	AB	AB	AA	BB	BB	AB	AB		BB	AB	NC	AB	BB	BB	AB	BB	AB	AB	BB
785	AX-89821805	AB	AA	AA	AA	AA	AA	AB	AB	AA	AA	BB	AB	AB	AA	AB	AA	AA	AB	AB	AB	BB	AB	BB	AB	AB	AB	AB	BB	AA	AB	AB	BB	AA	AA	BB	AB		AA	AB	NC	AB	AA	AA	AB	AA	AB	AA	AA
786	AX-89869738	BB	BB	NC	BB	BB	BB	AB	BB	BB	BB	AA	AB	AB	AB	AB	BB	BB	AB	AB	AB	AA	AB	AA	AB	AB	AB	AB	AA	BB	AB	AB	AA	BB	BB	AB	AB		BB	AB	AA	AB	BB	BB	AB	BB	AB	AB	BB
787	AX-89821785	BB	AA	AB	BB	AA	BB	AB	BB	AA	BB	BB	AB	AB	BB	AB	AA	AA	AB	AB	AB	BB	AB	BB	AB	AB	AB	AB	BB	NC	AB	AB	BB	AA	BB	BB	AB		AA	AB	BB	AB	AA	AA	AB	AA	AB	AB	AA
788	AX-89821777	BB	AA	AA	BB	NC	BB	AB	BB	AA	BB	BB	AB	AB	BB	AB	AA	AA	NC	AB	AB	BB	AB	BB	AB	AB	AB	AB	BB	AA	AB	AB	BB	AA	BB	BB	AB		AA	AB	NC	AB	AA	AA	AB	AA	AB	AB	AA
789	AX-89821763	BB	BB	BB	BB	BB	BB	AB	BB	BB	BB	AA	AB	AB	BB	AB	BB	BB	AB	AB	AB	AA	AB	AA	AB	AB	AB	AB	AA	BB	AB	AB	AA	BB	BB	AB	AB		BB	AB	NC	AB	BB	BB	AB	BB	AB	AB	BB
790	AX-89878896	AA	BB	BB	AA	BB	AA	AB	AB	BB	AA	AA	AB	AB	AA	AB	BB	BB	AB	AB	AB	AA	AB	AA	AB	AB	AB	AB	AA	BB	AB	AB	AA	BB	BB	AB	AB		BB	AB	NC	AB	BB	BB	AB	BB	AB	AB	BB
791	AX-89782832	AB	NC	BB	AB	NC	AB	AA	BB	NC	AA	AA	AB	AB	AA	NC	BB	AA	AB	AB	AB	AA	AB	AA	AB	AB	AB	AB	AA	BB	NC	AA	AA	AB	AB	AB	AB		BB	AB	NC	AB	BB	BB	AB	BB	AB	AB	BB
792	AX-89878892	BB	AA	AA	BB	AA	BB	AB	NC	AA	BB	BB	AB	AB	BB	AB	AA	AA	AB	AB	AB	BB	AB	BB	AB	AB	AB	AB	BB	AA	AB	AB	BB	AA	AA	AB	AB		AA	AB	NC	AB	AA	AA	AB	AA	AB	AA	AA
793	AX-89782828	AA	AA	AA	AA	AA	AA	AB	AA	AA	AA	BB	AB	AB	AA	AB	AA	AA	AB	AB	AB	BB	AB	BB	AB	AB	AB	AB	BB	AA	AB	AB	BB	AA	AA	AA	AB		AA	AB	NC	AB	AA	AA	AB	AA	AB	AB	AA
794	AX-89783196	BB	AA	AA	BB	AA	BB	AB	BB	AA	BB	AB	BB	BB	BB	AB	AB	AA	BB	AB	AB	BB	AB	BB	AB	AB	BB	AB	BB	AB	BB	AB	AB	AB	BB	BB	BB		AB	AB	AB	AB	AB	AB	AB	AB	AB	AB	AB
795	AX-89879572	BB	AA	AA	AB	AA	AB	AB	AB	AA	BB	AB	BB	BB	AB	AB	AB	AA	AA	AB	AB	BB	AB	BB	AB	AB	BB	AB	BB	AB	AA	AB	AB	AB	BB	AB	BB		AB	AB	AB	AB	AB	AB	AB	AB	AB	AB	AB
796	AX-89783219	AA	BB	BB	AA	BB	AA	AB	AA	BB	AA	AB	AB	AA	AA	AB	BB	BB	AB	BB	BB	AA	AB	AB	BB	BB	AB	BB	AB	AB	BB	AB	BB	AB	AA	AA	AB		AB	AB	AB	AB	AB	AB	AB	AB	AB	AB	AB
797	AX-89820964	AA	BB	BB	AB	BB	AA	AB	BB	NC	AA	AB	AA	AA	NC	AB	AB	BB	AB	AB	AB	AA	AB	AA	AB	AB	AA	AB	AA	AB	AB	AB	AB	AB	AA	AA	AA		AB	AB	AB	AB	AB	AB	AB	AB	AB	AB	AB
798	AX-89822169	AB	AA	AA	AB	AA	BB	AA	AB	AA	AB	AA	AA	AA	AB	AA	AA	AA	AA	AA	AA	AA	AA	AA	AA	AA	AA	AA	AA	AA	NC	AA	AA	AA	AB	AB	AA		AA	AA	AA	AA	AA	AA	AA	AA	AA	AA	AA
799	AX-89867688	AA	AA	AA	BB	AA	AB	AB	BB	AA	AB	AB	AB	AA	AB	AB	AA	AA	AA	AA	AA	AB	AA	AB	AA	AA	AB	AA	AB	AB	AA	AB	AA	AB	BB	AB	AB		AB	AB	AB	AB	AB	AB	AB	AB	AB	AB	AB
800	AX-89820916	AB	AA	AA	AB	AA	BB	AB	AA	AA	AB	AB	BB	BB	AA	AB	AB	AA	AA	AB	AB	BB	AB	BB	AB	AB	BB	AB	BB	AB	AB	AB	AB	AB	BB	AB	BB		AB	AB	AB	AB	AB	AB	AB	AB	AB	AB	AB
801	AX-89782276	BB	AA	AA	BB	AB	BB	AB	BB	AA	BB	AB	BB	BB	BB	AB	AB	AA	AA	AB	AB	BB	AB	BB	AB	AB	BB	AB	BB	AB	AB	AB	AB	AB	BB	BB	BB		AB	AB	AB	AB	AB	AB	AB	AB	AB	AB	AB
802	AX-89860810	AA	AA	NC	AA	AA	AA	AA	AB	AA	AA	AB	BB	BB	AB	AB	AB	AA	AA	AB	AB	BB	AB	BB	NC	AB	BB	AB	BB	AB	NC	AB	NC	AB	AA	AA	BB		NC	AB	AB	AB	AB	AB	AB	AB	AB	AB	AB
803	AX-89820885	BB	AA	AB	AA	AA	AA	AB	BB	AA	AA	AB	BB	BB	AA	AB	AB	NC	AA	AB	AB	BB	AB	BB	AB	AB	AB	AB	BB	AB	AB	AB	AB	AB	AA	AB	BB		AB	AB	AB	AB	AB	AB	AB	AB	AB	AB	AB
804	AX-89820949	AA	AA	AA	AB	AA	AA	AB	BB	AA	AB	AB	BB	AB	BB	AB	AB	AA	AA	AB	AB	BB	AB	BB	AB	AB	BB	AB	AB	AB	AA	AB	AB	AB	AB	AB	AB		AB	AB	AB	AB	AB	AB	AB	AB	AB	AB	AB
805	AX-89820948	BB	BB	AB	AB	BB	BB	AB	AA	BB	AB	AA	AA	AB	AA	AA	AB	BB	BB	AB	AB	AA	AB	AA	AB	AB	AA	AB	AA	AA	BB	AB	AB	AA	BB	BB	AA		AB	AB	AB	AB	AB	AB	AB	AB	AB	AB	AB
806	AX-89782289	AA	AA	AA	AA	AA	AA	AB	AA	AA	AA	AB	BB	BB	AA	NC	AB	AA	AA	AB	AB	BB	AB	BB	AB	AB	BB	AB	BB	AB	AB	AB	AB	AB	AA	AA	BB		AB	AB	AB	AB	AB	AB	AB	AB	AB	AB	AB
807	AX-89860806	AB	AA	AA	BB	AA	AB	AB	AB	AA	AB	AB	BB	BB	AB	AB	AB	AA	AA	AB	AB	BB	AB	BB	NC	AB	BB	AB	BB	AB	AB	AB	AB	AB	AB	AB	BB		AB	AB	AB	AB	AB	AB	AB	AB	AB	AB	AB
808	AX-89820823	BB	BB	BB	BB	BB	BB	AB	BB	BB	BB	AB	AA	AA	BB	AB	AB	BB	BB	AB	AB	AA	AB	AA	AB	AB	AA	AB	AA	AB	AB	AB	AB	AB	AB	AB	AA		AB	AB	AB	AB	AB	AB	AB	AB	AB	AB	AB
809	AX-89820811	BB	AA	AA	AA	AA	AA	AB	BB	AA	AA	AB	BB	BB	AA	AB	AB	AA	AA	AB	AB	BB	AB	BB	AB	AB	BB	AB	BB	AB	AB	AB	AB	AB	AA	AB	BB		AB	AB	AB	AB	AB	AB	AB	AB	AB	AB	AB
810	AX-89847347	AA	AA	AA	AA	AA	AB	AB	AB	AA	BB	AB	BB	BB	AB	AB	AB	AA	AA	AB	AB	BB	AB	BB	AB	AB	BB	AB	BB	AB	AB	AB	AB	AB	AB	AA	BB		AB	AB	AB	AB	AB	AB	AB	AB	AB	AB	AB
811	AX-89872327	BB	BB	BB	AA	BB	BB	AB	AB	BB	AB	AB	AA	AB	BB	AB	AB	BB	BB	AB	AB	AA	AB	AA	AB	AB	AA	AB	AA	AB	AB	AB	AB	AB	BB	BB	AA		AB	AB	AB	AB	AB	AB	AB	AB	AB	AB	AB
812	AX-89782139	BB	BB	BB	BB	BB	BB	NC	BB	BB	BB	AB	AA	AA	BB	AB	AB	BB	BB	AB	AB	AA	AB	AA	AB	AB	AB	AB	AA	AB	BB	AB	AB	AB	BB	BB	AA		AB	AB	AB	AB	AB	AB	AB	AB	AB	AB	AB
813	AX-89820753	AA	BB	BB	BB	BB	BB	AB	AA	BB	BB	AB	AA	AA	BB	AB	AB	BB	BB	AB	AB	AA	AB	AA	NC	AB	AA	AB	AA	AB	AB	AB	AB	AB	BB	AB	AA		AB	AB	AB	AB	AB	AB	AB	AB	AB	AB	AB
814	AX-89820751	AA	BB	BB	BB	BB	BB	AB	AA	BB	BB	AB	AA	AA	BB	AB	AB	BB	BB	AB	AB	AA	AB	AA	AB	AB	AA	AB	AA	AB	AB	AB	AB	AB	BB	AB	AA		AB	AB	AB	AB	AB	AB	AB	AB	AB	AB	AB
815	AX-89821616	AB	AA	AA	AB	AB	BB	AB	AB	AA	BB	AB	NC	AB	BB	AB	AB	AA	AB	AB	AB	BB	AB	BB	AB	AB	AB	AB	BB	AB	AB	AB	AB	AB	BB	BB	BB		AB	AB	AB	AB	AB	AB	AB	AB	AB	AB	AB
816	AX-89821723	AB	BB	AB	AB	AB	AB	AB	BB	AB	AB	AA	AA	AA	AB	AB	AB	BB	AB	AB	AA	AA	AB	AA	AB	AB	AA	AA	AA	AB	AA	AB	AA	AB	BB	BB	AA		AB	AB	AB	AB	AB	AB	AB	AB	AB	AB	AB
817	AX-89820717	BB	BB	BB	AA	BB	AA	AB	BB	BB	AA	AB	AA	AA	NC	AB	AB	BB	BB	AB	AB	AA	AB	AA	AB	AB	AA	AB	AA	AB	BB	AB	AB	AB	AA	AB	AA		AB	AB	AB	AB	AB	AB	AB	AB	AB	AB	AB
818	AX-89821636	AB	AA	AA	AB	AB	BB	AB	AA	AA	BB	AB	BB	AB	BB	AB	AB	AA	AB	AB	AB	BB	AB	BB	AB	AB	AB	AB	BB	AB	AB	AB	AB	AB	BB	BB	BB		AB	AB	AB	AB	AB	AB	AB	AB	AB	AB	AB
819	AX-89821634	AB	BB	BB	AB	AB	BB	NC	AA	AB	BB	AA	AA	AA	BB	AB	AB	BB	AB	AB	AA	AA	AB	AA	AB	AB	AA	AA	AA	AB	AA	AB	AA	AB	BB	BB	AA		AB	AB	AB	AB	AB	AB	AB	AB	AB	AB	AB
820	AX-89878858	BB	BB	AB	BB	AB	BB	AB	AB	BB	BB	AA	AA	AA	BB	AB	AB	BB	AB	AB	AA	AA	AB	AA	AB	AB	AA	AA	AA	AB	AA	AB	AA	AB	AB	AB	AA		AB	AB	AB	AB	AB	AB	AB	AB	AB	AB	AB
821	AX-89847417	BB	AA	AA	AA	AB	BB	AB	AA	AA	AB	AB	BB	AB	AB	AB	AB	AA	AB	AB	AB	BB	AB	BB	AB	AB	BB	AB	BB	AB	AB	AB	AB	AB	AB	BB	BB		AB	AB	AB	AB	AB	AB	AB	AB	AB	AB	AB
822	AX-89782729	AA	BB	BB	AA	AB	AA	AB	AA	BB	AA	AB	AA	AB	AA	AB	AB	BB	AB	AB	AB	AA	AB	AA	AB	AB	AB	AB	AB	AB	AB	AB	AB	AB	AA	AA	AB		AB	AB	AB	AB	AB	AB	AB	AB	AB	AB	AB
823	AX-89782770	BB	AA	AB	BB	AB	BB	AB	BB	AA	BB	BB	BB	BB	BB	AB	AB	AA	AB	NC	BB	BB	AB	BB	AB	AB	BB	BB	BB	AB	BB	AB	BB	AB	BB	BB	BB		AB	AB	AB	AB	AB	AB	AB	AB	AB	AB	AB
824	AX-89847410	BB	AA	AA	BB	AB	BB	AB	AB	AA	BB	BB	BB	BB	BB	AB	AB	AA	AB	AB	BB	BB	AB	BB	AB	AB	BB	BB	BB	AB	BB	AB	BB	AB	BB	BB	BB		AB	AB	AB	AB	AB	AB	AB	AB	AB	AB	AB
825	AX-89847412	AA	BB	BB	AB	AB	AA	AB	AB	BB	AB	AB	AA	AB	AB	AB	AB	BB	AB	AB	AB	AA	AB	AA	AB	AB	AB	AB	AA	AB	AB	AB	AB	AB	AA	AA	AA		AB	AB	AB	AB	AB	AB	AB	AB	AB	AB	AB
826	AX-89847413	AB	BB	BB	BB	AB	AB	AB	BB	BB	AB	AA	AA	AA	AB	AB	AB	BB	AB	AB	AA	AA	AB	AA	AB	AB	AA	AA	AA	AB	AA	AB	AA	AB	AB	AA	AA		AB	AB	AB	AB	AB	AB	AB	AB	AB	AB	AB
827	AX-89782112	AA	BB	BB	BB	BB	AB	AB	BB	BB	AB	AB	AA	AB	NC	AB	AB	BB	BB	AB	AB	AA	AB	AA	AB	AB	AA	AB	AA	AB	BB	AB	AB	AB	BB	AB	AA		AB	AB	AB	AB	AB	AB	AB	AB	AB	AB	AB
828	AX-89782780	AA	BB	BB	AA	AB	AA	AB	AA	AB	AA	AA	AA	AA	AA	AB	AB	AB	AB	AB	AA	AA	AB	AA	AB	AB	AA	AA	AA	AB	AA	AB	AA	AB	AA	AA	AA		AB	AB	AB	AB	AB	AB	AB	AB	AB	AB	AB
829	AX-89904525	AA	BB	BB	AA	AB	AA	AB	AB	BB	AA	AA	AA	AA	AA	AB	AB	BB	AB	AB	AA	AA	AB	AA	AB	AB	AA	AA	AA	AB	AA	AB	AA	AB	AA	AA	AA		AB	AB	AB	AB	AB	AB	AB	AB	AB	AB	AB
830	AX-89782722	AA	AA	AA	AA	AB	AA	AB	AA	AA	AA	AB	BB	AB	AA	AB	AB	AA	AB	AB	AB	BB	AB	BB	AB	AB	AB	AB	BB	AB	AB	AB	AB	AB	AA	AA	BB		AB	AB	AB	AB	AB	AB	AB	AB	AB	AB	AB
831	AX-89782795	BB	BB	BB	BB	AB	BB	AB	BB	BB	BB	AA	AA	AA	BB	AB	AB	BB	AB	AB	AA	AA	AB	AA	AB	AB	AA	AA	AA	AB	AA	AB	AA	AB	BB	BB	AA		AB	AB	AB	AB	AB	AB	AB	AB	AB	AB	AB
832	AX-89782819	AA	AA	AA	AA	AB	AA	NC	AA	AA	AA	AB	BB	BB	AA	NC	AB	AA	NC	AB	AB	BB	AB	BB	AB	AB	BB	AB	BB	AB	BB	AB	AB	AB	AA	AA	BB		AB	AB	AB	AB	AB	AB	AB	AB	AB	AB	AB
833	AX-89782813	AA	BB	NC	AB	AB	AA	AB	BB	BB	BB	AA	AA	AA	AA	AB	AB	AB	AB	AB	AA	AA	AB	AA	AB	AB	AA	AA	AA	AB	AA	AB	AA	AB	BB	BB	AA		AB	AB	AB	AB	AB	AB	AB	AB	AB	AB	AB
834	AX-89821658	AB	BB	BB	AA	AB	AB	AB	BB	AB	AA	AB	AA	AB	AA	AB	AA	BB	AA	AA	AA	AA	AB	AA	AA	AA	AA	AA	AA	AB	NC	AB	AA	AB	AA	AA	AA		AB	AB	AB	AB	AB	AB	AB	AB	AB	AB	AB
835	AX-89803468	AB	AA	AB	AB	AB	BB	AA	AA	AA	BB	BB	AB	NC	AB	AB	AA	AA	AA	AA	AA	AB	AA	NC	AA	AA	AA	AB	AB	BB	NC	AA	AA	BB	BB	BB	AB		AB	AA	AB	AA	AA	AB	AA	AB	AB	AB	AA
836	AX-89819952	AB	BB	BB	AB	NC	AB	AA	AB	BB	AB	AB	AB	AA	AA	NC	BB	AA	BB	BB	BB	AB	BB	AB	BB	BB	BB	AB	AB	AB	AB	AA	BB	AB	AB	AA	BB		NC	AB	NC	AB	AB	NC	AB	NC	NC	NC	AB
837	AX-89787726	AA	BB	BB	AB	AB	AB	BB	AB	AA	AB	BB	AB	BB	NC	AB	AB	BB	NC	AB	AB	BB	BB	AB	AB	AB	NC	BB	AB	BB	AA	AB	BB	AA	AA	AB	BB		BB	AB	BB	AB	AB	AB	AB	AB	BB	AB	AB
838	AX-89824002	AA	AA	AA	AA	AB	AA	AA	AB	BB	AA	AA	AB	AA	NC	AB	AB	AA	BB	AB	AB	AA	AA	BB	AB	AB	BB	AA	AB	AA	BB	AB	AA	BB	AA	AA	AA		AA	AB	AA	AB	AB	AB	AB	AB	AA	AB	AB
839	AX-89847654	AA	AA	AA	AA	AB	AA	AA	AB	BB	AA	AA	AB	AA	AB	AB	AB	AA	BB	AB	AB	AA	AA	BB	AB	AB	BB	AA	AB	AA	BB	AB	AA	BB	AA	AA	AA		AA	AB	AA	AB	AB	AB	AB	AB	AA	AB	AB
840	AX-89787037	BB	AA	AA	BB	AA	BB	AA	BB	AB	BB	AA	AB	AA	BB	AA	AB	AA	AA	AA	AA	AA	AA	AB	AA	AA	AB	AA	AA	AA	AB	AB	AA	BB	BB	BB	AA		AA	AA	AA	AB	AB	AB	AA	AA	AA	AA	AB
841	AX-89826921	AA	BB	BB	AA	BB	AA	BB	AA	AB	AA	BB	AB	BB	AA	BB	AB	BB	BB	BB	BB	BB	BB	AB	BB	BB	AB	BB	BB	BB	AB	AB	BB	AB	AA	AA	BB		AB	BB	BB	AB	AB	AB	BB	BB	BB	BB	AB
842	AX-89881400	BB	AA	AA	AB	AB	BB	AA	BB	BB	BB	AA	AB	AA	BB	AB	AB	AA	BB	AB	AB	AA	AA	BB	AB	AB	BB	AA	AB	AA	BB	AB	AA	BB	BB	AB	AA		AA	AB	AA	AB	AB	AB	AB	AB	AA	AB	AB
843	AX-89784634	AB	BB	BB	AB	AB	AB	BB	AB	AA	BB	BB	AB	BB	BB	AB	AB	BB	AA	AB	AB	BB	BB	AA	AB	AB	AA	BB	AB	BB	AA	AB	BB	AA	BB	AB	BB		BB	AB	BB	AB	AB	AB	AB	AB	BB	AB	AB
844	AX-89863285	AA	AA	AA	AA	AA	AA	AA	AA	AB	AA	AA	AB	AA	AA	AA	AB	AA	AA	AA	AA	AA	AA	AB	AA	AA	AB	AA	AA	AA	AB	AB	AA	BB	AA	AA	AA		AB	AA	AA	AB	AB	AB	AA	AA	AA	AA	AB
845	AX-89884902	BB	AA	AA	AA	AB	AB	AA	AA	BB	AB	AA	AB	AA	AB	AB	AB	AA	BB	AB	AB	AA	AA	BB	AB	AB	BB	AA	AB	AA	BB	AB	AA	BB	AA	AB	AA		AB	AB	AA	AB	AB	AB	AB	AB	AA	AB	AB
846	AX-89787547	AA	BB	BB	AB	AB	AA	BB	AB	AA	AB	BB	AB	BB	NC	AB	AB	BB	NC	AB	AB	BB	BB	NC	AB	AB	AA	BB	AB	BB	AA	AB	BB	AA	BB	AA	BB		BB	AB	BB	AB	AB	AB	AB	AB	BB	AB	AB
847	AX-89807302	BB	BB	BB	BB	AB	BB	BB	BB	AA	BB	BB	AB	BB	BB	AB	AB	BB	AA	AB	AB	BB	BB	AA	AB	AB	AA	BB	AB	BB	AA	AB	NC	AA	BB	BB	BB		BB	AB	BB	AB	AB	AB	AB	AB	BB	AB	AB
848	AX-89786942	AA	BB	BB	AB	BB	AB	BB	BB	AB	AB	BB	BB	BB	AB	BB	AB	BB	BB	AB	AB	BB	BB	AB	BB	BB	AB	BB	BB	BB	AB	AB	BB	AB	AB	AA	BB		BB	BB	BB	BB	BB	BB	BB	BB	BB	BB	BB
849	AX-89786824	AA	AA	AA	AB	AA	AB	AA	AB	AB	AB	AA	AA	AA	NC	AA	AB	AA	AA	AB	AB	AA	AA	AB	AA	AA	AB	AA	AA	AA	AB	AB	AA	AB	AB	AB	AA		AA	AA	AA	AA	AA	AA	AA	AA	AA	AA	AA
850	AX-89786825	BB	AA	AA	BB	AA	BB	AA	BB	AB	BB	AA	AA	AA	NC	AA	AB	AA	AA	AB	AB	AA	AA	AB	AA	AA	AB	AA	AA	AA	AB	AB	AA	AB	BB	BB	AA		AA	AA	AA	AA	AA	AA	AA	AA	AA	AA	AA
851	AX-89786111	AB	BB	BB	AB	AB	AB	BB	BB	AA	BB	BB	AB	BB	NC	AB	AB	BB	AA	AB	AB	AB	BB	AA	AB	AB	AA	BB	AB	BB	AA	AB	BB	AB	BB	BB	BB		BB	BB	AB	BB	BB	BB	BB	BB	AB	BB	BB
852	AX-89904813	AA	AA	AA	AA	AB	AB	AA	AA	BB	AA	AB	AA	AA	AB	AA	AB	AA	BB	AB	AB	AB	AA	AB	AA	AA	AB	AB	AA	AA	BB	AB	AA	AB	AB	AB	AA		AA	NC	AA	AA	AA	AA	NC	NC	AA	NC	AA
853	AX-89825543	AB	BB	BB	AB	BB	AB	BB	AA	AB	AA	BB	BB	BB	BB	BB	AB	BB	NC	AB	AB	NC	BB	AB	BB	BB	AB	BB	BB	BB	AB	AB	BB	AB	AB	AB	BB		BB	BB	BB	BB	BB	BB	BB	BB	BB	BB	BB
854	AX-89824590	AA	AB	AB	AA	BB	AA	AB	AA	BB	AB	BB	AB	AB	NC	AB	AB	AB	BB	BB	BB	AB	AB	BB	AA	AB	AB	BB	AA	AB	NC	BB	AB	BB	AA	AA	BB		AB	BB	AB	BB	AB	BB	BB	BB	NC	BB	BB
855	AX-89784805	BB	BB	BB	AB	BB	AB	BB	BB	AB	AB	AB	BB	BB	BB	BB	AB	BB	BB	AB	AB	AB	BB	AB	BB	BB	BB	AB	BB	BB	NC	AB	BB	AB	AB	AB	BB		BB	NC	BB	BB	BB	BB	NC	NC	BB	NC	BB
856	AX-89787136	AA	BB	BB	AA	BB	AA	BB	AB	AB	AA	AB	BB	BB	AA	BB	AB	BB	BB	AB	AB	AB	BB	AB	BB	BB	BB	AB	BB	BB	AB	AB	BB	AB	AA	AA	BB		BB	NC	BB	BB	BB	BB	NC	NC	BB	NC	BB
857	AX-89827284	AB	AA	AA	BB	AA	AA	AA	BB	AB	AB	AB	AA	AA	AA	AA	AB	AA	AA	AB	AB	AB	AA	AB	AA	AA	AA	AB	AA	AA	AB	AA	AA	AB	AB	NC	AA		AA	NC	AA	AA	AA	AA	NC	NC	AA	NC	AA
858	AX-89861226	BB	BB	BB	BB	AB	BB	BB	BB	AB	BB	AB	BB	BB	BB	BB	AB	BB	BB	AB	AB	AB	BB	AA	BB	BB	BB	AB	BB	BB	AB	AB	BB	AB	BB	BB	BB		BB	NC	BB	BB	BB	BB	NC	NC	BB	NC	BB
859	AX-89827529	BB	AA	AA	BB	AA	AB	AA	BB	BB	BB	AB	AA	AB	BB	AA	AB	AA	BB	AB	AB	AB	AA	BB	AA	AA	AB	AB	AA	AA	BB	AB	AA	AB	BB	BB	AA		AA	NC	AA	AA	AA	AA	NC	NC	AA	NC	AA
860	AX-89827483	BB	AB	AB	BB	AA	AB	AB	BB	BB	BB	BB	AB	BB	BB	AB	AB	AB	BB	BB	BB	AB	AB	BB	AA	AB	AB	BB	AA	AB	BB	BB	AB	BB	BB	BB	BB		AB	BB	AB	BB	AB	BB	BB	BB	AA	BB	BB
861	AX-89787254	AA	AB	AB	AA	BB	AA	AB	AB	AB	AA	AA	AB	AB	AA	AB	BB	AB	BB	AA	AA	AB	AB	AA	BB	AB	BB	AA	BB	AB	AB	AB	AB	AA	AA	AA	AA		AB	AA	AB	AA	AB	AA	AA	AA	BB	AA	AA
862	AX-89787233	BB	AB	AB	AB	AA	AB	AB	AB	BB	AB	BB	AB	BB	NC	AB	AA	AB	BB	BB	BB	AB	AB	BB	AB	AB	AB	BB	AA	AB	BB	AB	AB	BB	BB	AB	BB		AB	BB	AB	BB	AB	BB	BB	BB	AA	BB	BB
863	AX-89827384	AB	AA	AA	AA	AA	BB	AA	AB	BB	AB	AB	AA	AA	AB	AA	AA	AA	AA	AB	AB	AB	AA	BB	AA	AA	AA	AB	AA	AA	AB	AA	AA	AB	AB	AB	AA		AA	NC	AA	AA	AA	AA	NC	NC	AA	NC	AA
864	AX-89787414	AB	BB	BB	BB	BB	AB	AB	BB	AA	BB	AB	AB	BB	NC	AB	BB	BB	BB	AB	AB	AB	BB	AA	BB	BB	BB	AB	BB	AB	AB	AB	AB	AA	BB	AB	AB		AB	AB	BB	AB	AB	NC	AB	AB	BB	AB	AB
865	AX-89827656	AB	AA	AA	BB	AA	AB	AB	AB	BB	BB	AB	AB	AA	AB	AB	AA	AA	AB	AB	AB	AB	AA	BB	NC	AA	AA	AB	AA	AB	AB	AB	AB	BB	BB	BB	AB		AB	AB	AA	AB	AB	AB	AB	AB	AA	AB	AB
866	AX-89787936	BB	BB	AB	AB	BB	AB	AB	AB	AB	AB	AB	AB	BB	NC	AB	AB	AB	AB	AB	AB	AB	AB	AA	BB	BB	AB	AB	BB	NC	AB	AB	AB	AA	BB	AB	AB		AB	AA	BB	AA	AB	AA	AA	AA	BB	AA	AA
867	AX-89828211	AB	BB	AB	AB	BB	AB	AB	AB	AB	AB	AA	AB	BB	AA	AA	BB	BB	AB	AB	AB	AB	BB	AA	BB	BB	AB	AB	BB	AA	AB	AB	BB	AA	AB	AB	AB		AB	AB	BB	AB	AB	AB	AB	AB	BB	AB	AB
868	AX-89807351	AA	AA	AA	AB	AA	AB	AB	BB	AB	AA	AB	AB	AA	BB	AB	AA	AA	AB	AB	AB	AB	AA	BB	AA	AA	AB	AB	AA	AB	AB	AB	AA	BB	AB	BB	AB		AB	AB	AA	AB	AB	AB	AB	AB	AA	AB	AB
869	AX-89828165	BB	BB	AB	BB	AB	BB	AB	BB	AA	BB	AB	AB	AA	BB	AB	AB	AB	AA	AB	AB	AB	AB	AA	BB	BB	AA	AB	BB	AB	AA	AB	AB	AA	BB	BB	AB		AB	AA	BB	AA	AB	AA	AA	AA	BB	AA	AA
870	AX-89905049	AB	AA	AA	AA	AA	AA	BB	AA	AB	AA	AB	AB	AA	BB	AB	AA	AA	AB	AB	AB	AB	AA	BB	AA	AA	AB	AB	AA	AB	AB	AB	AA	BB	AB	AB	AB		AB	AB	AA	AB	AB	AB	AB	AB	AA	AB	AB
871	AX-89828053	NC	AA	AB	AA	AB	AB	BB	AB	BB	AB	AB	BB	BB	AA	BB	AB	AB	BB	AB	AB	AB	AB	BB	AB	AB	BB	AB	AB	AB	BB	AB	AB	BB	AA	AA	AB		AB	BB	AB	BB	AB	BB	BB	BB	AB	BB	BB
872	AX-89787787	AB	BB	BB	BB	BB	AB	AA	BB	AB	BB	AB	AB	BB	NC	AB	BB	BB	AB	AB	AB	AB	BB	AA	BB	BB	AB	AB	BB	AB	AB	AB	BB	AA	BB	AB	AB		AB	AB	BB	AB	AB	AB	AB	AB	BB	AB	AB
873	AX-89848239	AA	AA	AA	AA	AA	AA	BB	AA	AB	AA	AB	AB	AA	AA	AB	AA	AA	AB	AB	AB	AB	AA	BB	AA	AA	AB	AB	AA	AB	AB	AB	AA	BB	AA	AA	AB		AB	AB	AA	AB	AB	AB	AB	AB	AA	AB	AB
874	AX-89848226	BB	AA	AA	BB	AA	BB	BB	BB	AB	BB	AB	AB	AA	BB	AB	AA	AA	AB	BB	AB	AA	AA	BB	AB	AA	AB	AB	AA	AB	AB	AB	AA	BB	BB	BB	AB		AB	AB	AB	AB	AB	AB	AB	AB	AA	AB	AB
875	AX-89787670	AA	BB	AB	AA	BB	AA	AA	AA	AB	AA	AB	AA	BB	AA	AA	AB	AB	AB	AA	AB	AB	AB	AA	AB	AB	AB	AB	AB	AB	AB	AA	AB	AA	AA	AA	AB		AB	AA	AA	AA	AB	AA	AA	AA	AB	AA	AA
876	AX-89787602	BB	AA	AB	BB	AB	BB	BB	AB	BB	BB	AB	BB	AB	AB	BB	AB	AB	BB	BB	AB	AB	AB	BB	AB	AB	AB	AB	AB	AB	BB	BB	AB	BB	BB	BB	AB		AB	BB	BB	BB	AB	BB	BB	BB	AB	AB	BB
877	AX-89884973	BB	AB	BB	AB	BB	BB	AA	AB	AB	BB	AB	AB	BB	BB	AB	BB	BB	AB	AA	AB	BB	BB	AA	AA	AB	AB	AB	BB	AB	AB	AB	AB	AA	AB	BB	AB		AB	BB	AB	AB	AB	AB	AB	AB	BB	AB	AB
878	AX-89827832	AB	AB	AB	BB	BB	AB	BB	BB	BB	AB	AB	BB	AB	BB	BB	AB	AB	BB	BB	AB	AB	AB	BB	BB	BB	BB	AA	AB	AB	BB	BB	BB	BB	BB	AB	AB		AB	AB	BB	BB	AB	BB	BB	BB	AB	AB	BB
879	AX-89825814	BB	AB	AA	BB	BB	BB	BB	AB	BB	BB	AB	AB	NC	NC	AB	AA	AA	BB	BB	AB	AA	AA	BB	BB	AB	BB	AB	AA	AB	BB	AB	AB	AB	BB	BB	AB		AB	AA	AB	AB	AB	AB	AB	AB	AA	AB	AB
880	AX-89848012	AB	AA	AA	AB	AA	AB	AB	AB	AA	AB	AB	AB	AA	AB	AB	AA	AA	AA	AA	AA	AA	AA	AA	AA	AB	AA	AA	AB	AA	AA	AB	AA	AB	AB	AB	AB		AB	AA	AB	AB	AA	AA	AB	AB	AB	AB	AB
881	AX-89848117	BB	AA	AA	AB	AA	AB	AB	AB	AA	AB	AB	AB	AA	AB	AB	AA	AA	AA	AA	AA	AA	AA	AA	AA	AB	AA	AA	AB	AA	AA	AB	AA	AB	AB	AB	AB		AB	AA	AB	AB	AA	AA	AB	AB	AB	AB	AB
882	AX-89848111	BB	AA	AA	AB	AA	AB	AB	AB	AA	AB	AB	AB	AA	AB	AB	AA	AA	AA	AA	AA	AA	AA	AA	AA	AB	AA	AA	AB	AA	AA	AB	AA	AB	AB	AB	AB		AB	AA	AB	AB	AA	AA	AB	AB	AB	AB	AB
883	AX-89826413	AB	BB	BB	AA	BB	AA	NC	AA	BB	AA	AB	AB	BB	AA	AB	BB	BB	BB	BB	BB	BB	BB	BB	BB	AB	BB	BB	AB	BB	NC	AB	BB	AB	AA	AB	AB		AB	BB	AB	AB	BB	BB	AB	AB	AB	AB	AB
884	AX-89883564	AB	BB	BB	AB	BB	AB	AB	AB	BB	AA	BB	BB	BB	AB	BB	BB	BB	BB	BB	BB	BB	BB	BB	BB	BB	BB	BB	BB	BB	NC	BB	BB	BB	NC	BB	BB		BB	BB	BB	BB	BB	BB	BB	BB	BB	BB	BB
885	AX-89863385	AB	AA	AA	BB	AA	AB	AA	BB	AB	BB	AA	AA	AB	AA	AA	AA	AA	AA	AA	AA	AA	AA	AA	AA	AA	AB	AA	AA	AA	NC	AA	AB	AA	BB	AB	AA		AA	AA	AA	AA	AA	AA	AA	AA	AA	AA	AA
886	AX-89786710	AA	AA	AA	AB	AA	AB	AA	AA	AA	AA	AA	AA	AB	AA	AA	AA	AA	AA	AA	AA	AA	AA	AA	AA	AA	AA	AA	AA	AA	NC	AA	AA	AA	AA	AB	AA		AA	AA	AA	AA	AA	AA	AA	AA	AA	AA	AA
887	AX-89883462	AB	BB	BB	BB	BB	BB	BB	BB	BB	BB	AB	AB	BB	BB	AB	BB	BB	BB	BB	BB	BB	BB	BB	BB	AB	BB	BB	AB	BB	NC	AB	BB	AB	BB	AB	AB		AB	BB	AB	AB	BB	BB	AB	AB	AB	AB	AB
888	AX-89884059	AB	BB	BB	BB	BB	AB	BB	AA	BB	AB	AB	AB	AA	BB	AB	BB	BB	BB	BB	BB	BB	BB	AB	BB	AB	BB	BB	AB	BB	BB	AB	BB	AB	AB	AA	AB		AB	BB	AB	AB	BB	BB	AB	AB	AB	AB	AB
889	AX-89883524	AB	BB	BB	AA	BB	AB	BB	AA	BB	AB	AB	AB	BB	AA	AB	BB	BB	BB	BB	BB	BB	BB	BB	BB	AB	BB	BB	AB	BB	NC	AB	BB	AB	AB	AB	AB		AB	BB	AB	AB	BB	BB	AB	AB	AB	AB	AB
890	AX-89826587	BB	BB	BB	AB	BB	AB	BB	BB	BB	BB	AB	AB	BB	AA	AB	AB	BB	BB	BB	AB	BB	AB	BB	BB	AB	BB	BB	AB	BB	BB	AB	BB	AB	AB	BB	AB		AB	BB	AB	AB	BB	BB	AB	AB	AB	AB	AB
891	AX-89826562	AB	AB	AB	AB	AB	AB	AB	AB	AA	AB	AA	AA	AB	BB	AA	AA	AB	AB	AA	AA	AB	AA	AA	AB	AB	AA	AA	AA	AA	AB	AB	AA	AB	BB	AA	AA		AB	AB	AA	AA	AB	AB	AB	AA	AA	AA	AB
892	AX-89807188	AA	AB	AB	AA	AB	AA	AA	AA	AA	AA	AA	AA	AB	AA	AA	AB	AB	AB	AA	AA	AB	AA	AA	NC	AB	AA	AA	AA	AA	AB	AB	AA	AB	AA	AA	AA		AB	AB	AA	AA	AB	AB	AB	AA	AA	AA	AB
893	AX-89883638	AB	BB	BB	BB	BB	AA	BB	AB	BB	AB	BB	BB	BB	AB	BB	AB	BB	BB	BB	BB	BB	BB	BB	BB	AB	BB	BB	AB	BB	AB	BB	BB	BB	AB	AB	BB		BB	BB	BB	BB	BB	BB	NC	NC	BB	NC	BB
894	AX-89824945	AA	AA	AA	AA	AA	AB	AA	AA	AA	AA	AA	AA	AA	AB	AA	AB	AA	AA	AA	AA	AA	AA	AA	AA	AA	AA	AA	AA	AA	NC	AA	AA	AA	AA	BB	AA		AA	AA	AA	AA	AA	AA	AA	AA	AA	AA	AA
895	AX-89785259	BB	BB	BB	BB	BB	BB	BB	BB	BB	BB	BB	BB	BB	AB	BB	AB	BB	BB	BB	BB	BB	BB	BB	BB	BB	BB	BB	BB	BB	NC	BB	BB	BB	BB	BB	BB		BB	BB	BB	BB	BB	BB	BB	BB	BB	BB	BB
896	AX-89824994	AB	BB	BB	AA	BB	AA	BB	AA	BB	AA	BB	BB	BB	AA	BB	AB	BB	BB	BB	BB	BB	BB	BB	BB	BB	BB	BB	BB	BB	NC	BB	BB	BB	AA	AA	BB		BB	BB	BB	BB	BB	BB	BB	BB	BB	BB	BB
897	AX-89825077	AB	AA	AA	BB	AA	AB	AA	AB	AA	BB	AA	AA	AA	BB	AA	AA	AA	AA	AA	AA	AA	AA	AA	AA	AA	AA	AA	AA	AA	NC	AA	AA	AA	AB	AB	AA		AA	AA	AA	AA	AA	AA	AA	AA	AA	AA	AA
898	AX-89825340	AA	BB	BB	AB	BB	AA	BB	AB	AA	AB	AB	AB	AB	AA	AB	AB	AB	AB	AB	AB	BB	BB	BB	BB	AB	BB	BB	AB	AB	AB	AB	BB	AB	AA	AA	AB		AB	BB	AB	AB	BB	BB	AB	AB	AB	AB	AB
899	AX-89882368	AA	AB	AA	AA	AB	AA	AA	AA	AB	AA	AA	AA	AA	AA	AA	AB	AB	BB	AA	AA	AA	AB	AA	AB	AB	AA	AA	AA	AA	AA	AB	AA	AB	AB	AA	AA		AA	AA	AA	AA	AA	AA	AA	AA	AA	AA	AA
900	AX-89785519	BB	AB	AB	AB	AB	AB	BB	AB	AB	BB	BB	BB	BB	AB	BB	AB	AB	AA	BB	BB	BB	AB	BB	AB	AB	BB	BB	BB	BB	BB	AB	BB	AB	BB	AB	BB		AB	AB	BB	BB	BB	AB	AB	BB	BB	BB	AB
901	AX-89825260	BB	AA	AA	AB	AA	BB	AA	AB	AA	AB	AA	AA	BB	BB	AA	AA	AA	AA	AA	AA	AA	AA	AA	AA	AB	AA	AA	AB	AA	AB	AA	AA	AA	NC	BB	AA		AA	AA	AA	AA	AA	AA	NC	NC	AA	NC	AA
902	AX-89825479	AA	AB	AB	AA	AB	AA	AA	AA	AA	AA	AB	AA	BB	AA	BB	AB	AB	AA	AA	AA	NC	AB	AA	AA	AB	AA	AA	AA	AB	AA	BB	AA	BB	AA	AA	AA		NC	AB	AB	AB	AA	AB	NC	AB	AB	AB	NC
903	AX-89784448	BB	AB	AB	BB	AA	AB	AB	BB	AA	AB	AB	AA	AA	BB	BB	AB	AB	AA	AA	NC	AA	AA	AB	AB	AB	AA	AB	AA	BB	NC	AB	AA	BB	BB	BB	AB		AA	AB	AB	AB	AB	AA	AB	AB	AA	AB	AB
904	AX-89824061	AA	AB	AB	AA	AA	AA	AB	AB	AA	AA	AB	AA	NC	AA	AB	AB	AB	AA	AA	AB	AA	AA	BB	AB	BB	AA	BB	AA	BB	AA	AB	AA	BB	AA	AA	AB		AA	NC	AB	AB	AB	AA	AB	NC	AA	AB	AB
905	AX-89824078	BB	AB	AB	AB	AA	BB	AB	BB	AA	AA	AB	AA	AA	BB	BB	AB	AB	AA	AA	AB	AA	AA	AB	AB	AB	AA	AB	AA	NC	AA	AB	AA	BB	BB	BB	AB		AA	NC	AB	AB	AB	AA	AB	NC	AA	AB	AB
906	AX-89847715	BB	AB	AB	BB	BB	BB	AB	BB	BB	BB	AB	BB	BB	BB	AA	AB	AB	BB	BB	AB	BB	BB	AA	AB	AA	BB	AA	BB	AA	BB	AB	BB	AA	BB	BB	AB		BB	NC	AB	AB	AB	BB	AB	NC	BB	AB	AB
907	AX-89824186	AA	AB	AB	AB	BB	AB	AB	AA	BB	BB	AB	BB	BB	AA	AA	AB	AB	BB	BB	AB	BB	BB	AB	AB	AA	BB	AB	BB	NC	BB	AB	BB	AA	AA	AB	AB		BB	NC	AB	AB	AB	BB	AB	NC	BB	AB	AB
908	AX-89784581	BB	AB	AB	BB	BB	BB	AB	BB	BB	BB	AB	BB	BB	AB	AA	AB	AB	BB	BB	AB	BB	BB	AB	NC	AA	NC	AA	BB	NC	BB	AB	BB	AA	BB	BB	AB		BB	NC	AB	AB	AB	BB	AB	NC	BB	AB	AB
909	AX-89824193	BB	AB	AB	AB	BB	BB	AB	BB	BB	AB	AB	BB	BB	BB	AA	AB	AB	BB	BB	AB	BB	BB	AB	AB	AA	BB	AA	BB	AA	BB	AB	BB	AA	BB	BB	AB		BB	NC	AB	AB	AB	BB	AB	NC	BB	AB	AB
910	AX-89824230	AA	AB	AB	BB	BB	AB	AB	AB	BB	BB	AB	BB	BB	AB	AA	AB	AB	BB	BB	AB	BB	BB	AB	AB	AA	BB	AA	BB	AA	BB	AB	BB	AB	AA	AB	AB		BB	NC	AB	AB	AB	BB	AB	NC	BB	AB	AB
911	AX-89824265	BB	AB	AB	AB	AA	BB	AA	AB	AA	AB	AA	AA	AA	BB	AA	AB	AA	AA	AA	AA	AA	AA	AA	AA	AB	AA	AA	AA	AB	NC	AA	AA	AB	BB	BB	AA		AA	AB	AA	AB	AB	AA	AA	AB	AA	AA	AB
912	AX-89824339	AB	AB	AB	AA	BB	AA	BB	AB	BB	AA	BB	BB	BB	AA	BB	AB	AB	BB	BB	BB	BB	BB	BB	BB	AB	BB	BB	BB	BB	NC	BB	BB	AB	BB	AB	BB		BB	AB	BB	AB	AB	BB	BB	AB	BB	BB	AB
913	AX-89847902	AA	AA	AB	AB	BB	AA	BB	AB	BB	AA	AB	AB	AB	AB	BB	AA	AB	BB	AA	BB	AB	BB	BB	AB	AA	AB	BB	AA	BB	AB	AB	BB	AB	AA	AA	AB		AB	AA	AB	AB	AA	AA	AB	AB	AB	BB	AB
914	AX-89825345	AB	AB	AB	BB	BB	AB	BB	BB	AB	AB	BB	BB	BB	AA	BB	AB	AB	BB	AB	AB	AB	AB	BB	AB	BB	AB	BB	BB	AB	NC	BB	BB	BB	AB	BB	AB		AB	AB	BB	AB	BB	BB	BB	BB	AB	AB	BB
915	AX-89785255	AA	AB	AB	AA	AB	AA	AA	AA	AB	AA	AB	AB	AA	AA	AA	AB	AB	AA	AB	AA	BB	AB	AA	AB	BB	AB	AA	AB	AB	AB	AB	AB	AA	AA	AA	AB		BB	AB	AB	BB	AB	AB	AA	AA	BB	AB	AA
916	AX-89825022	BB	AB	AB	BB	AA	BB	AA	AB	AB	BB	AA	AA	AA	NC	AA	AB	AB	AA	AB	AA	AB	AB	AA	AB	AB	AB	AA	AA	AB	AA	AA	AA	AA	BB	BB	AB		AB	AB	AA	AB	AA	AA	AA	AA	AB	AB	AA
917	AX-89825024	AB	AB	AB	AB	BB	AB	BB	AA	AB	AB	BB	BB	BB	AA	BB	AB	AB	BB	AB	BB	AB	AB	BB	NC	AB	AB	BB	BB	AB	BB	BB	BB	BB	AB	AB	AB		AB	AB	BB	AB	BB	BB	BB	BB	AB	AB	BB
918	AX-89882185	AB	AB	AB	AB	BB	AB	BB	AB	AB	AB	BB	BB	BB	AA	BB	AB	AB	BB	AB	BB	AB	AB	BB	AB	AB	AB	BB	BB	AB	NC	BB	BB	BB	AB	AA	AB		AB	AB	BB	AB	BB	BB	BB	BB	AB	AB	BB
919	AX-89785281	BB	AB	AB	AB	AB	BB	BB	AB	AB	AB	NC	BB	NC	BB	BB	AB	AB	BB	AB	BB	AB	AB	BB	AB	AB	AB	BB	BB	AB	NC	BB	BB	BB	BB	BB	AB		AB	AB	BB	AB	BB	BB	BB	BB	AB	AB	BB
920	AX-89824913	BB	AB	AB	BB	BB	BB	BB	AB	AB	BB	AB	AB	BB	NC	BB	AB	AB	BB	BB	BB	AB	AB	BB	AB	AA	AB	BB	AB	AB	BB	BB	BB	BB	BB	BB	AB		AA	AB	AB	AA	AB	AB	BB	BB	AA	AB	BB
921	AX-89826478	AA	AB	AB	AA	AB	AA	BB	AA	AB	AA	AB	AB	BB	AA	BB	AB	AB	BB	BB	BB	AA	AB	BB	AB	AA	AB	AB	AB	AB	AB	AB	AB	BB	AA	AA	AB		AA	AB	AB	AA	AB	AB	BB	BB	AA	AB	BB
922	AX-89786678	AB	BB	BB	AA	AB	AA	BB	AA	BB	NC	BB	BB	BB	NC	BB	AB	BB	BB	AB	AB	AB	BB	BB	BB	BB	BB	BB	BB	BB	AB	AB	AB	BB	AA	AA	BB		BB	BB	BB	BB	BB	BB	BB	BB	BB	BB	BB
923	AX-89786628	BB	AB	AB	AB	AA	AB	AB	AB	AB	AB	AB	AB	AA	NC	AA	AB	AA	NC	AA	AA	AB	AB	AA	AB	BB	AB	AB	AB	AA	AA	AB	AA	AB	AB	AB	AB		BB	AB	AA	BB	AB	AB	AA	AA	BB	AB	AA
924	AX-89826334	BB	AB	AB	BB	BB	BB	AA	BB	AA	BB	AA	AA	AA	NC	AA	AB	BB	BB	AB	AB	AB	AB	AA	AA	AA	AA	AA	AB	AB	AB	AB	BB	AB	BB	BB	AA		AA	AB	AB	AB	AB	AB	AB	AB	AA	AA	AB
925	AX-89884128	BB	AB	AB	AB	AB	BB	BB	AB	BB	AB	BB	BB	BB	AB	BB	BB	AA	AA	BB	BB	BB	AB	BB	BB	BB	BB	BB	AB	AB	BB	BB	AB	AB	AB	AB	BB		BB	AB	AB	AB	AB	AB	AB	AB	BB	BB	AB
926	AX-89786634	BB	AB	AB	BB	AA	BB	AB	BB	AB	BB	AB	AB	AA	AB	AA	AB	AA	AA	AA	AA	AB	AB	AA	AB	AB	AB	AB	AB	AA	AA	AA	AA	AA	BB	BB	AB		BB	AB	AA	BB	AB	AB	AA	AA	BB	AB	AA
927	AX-89826657	AB	AB	AB	BB	BB	BB	AB	BB	AB	BB	AB	AB	BB	BB	BB	AB	BB	BB	BB	BB	AB	AB	BB	NC	AB	AB	AB	AB	BB	NC	BB	BB	BB	AB	AA	AB		AB	AB	BB	AA	AB	AB	BB	BB	AA	AB	BB
928	AX-89811768	AB	AB	AB	AB	AB	AB	AB	AA	AB	BB	AB	AB	BB	NC	BB	AB	AB	BB	BB	BB	AA	AB	BB	AB	AA	AB	AB	AB	AB	AB	AB	AB	BB	AB	AB	AB		AA	AB	BB	AA	AB	AB	BB	BB	AA	AB	BB
929	AX-89809643	AB	AB	AB	AA	AA	AA	AA	AA	AB	AA	AB	AB	AA	AA	AA	AB	AB	AA	AA	AA	AB	AB	AA	AB	AB	AB	AB	AB	AB	AA	AA	AA	AA	AA	AA	AB		BB	AB	AA	BB	AB	AB	AA	AA	BB	AB	AA
930	AX-89785701	AA	AB	AB	AA	AA	AA	AA	AA	AB	AA	AA	AA	AA	AA	AA	AB	AB	AA	AB	AA	AB	AB	AA	AB	AB	AB	AA	AA	AB	AA	AA	AA	AA	AA	AA	AB		AB	AB	AA	AB	AA	AA	AA	AA	AB	AB	AA
931	AX-89825060	AB	AB	AB	AB	BB	AB	BB	BB	AB	AB	BB	BB	BB	BB	BB	AB	AB	BB	AB	BB	AB	AB	BB	AB	AB	AB	BB	BB	AB	BB	BB	BB	BB	AB	AB	AB		AB	AB	BB	AB	BB	BB	BB	BB	AB	AB	BB
932	AX-89785686	AB	AB	AB	BB	AB	BB	AA	AB	AB	BB	AB	AB	AA	AB	AA	AB	AB	AA	AB	AA	BB	AB	AA	AB	BB	AB	AA	AB	AB	AB	AB	AB	AA	AB	BB	AB		BB	AB	AB	BB	AB	AB	AA	AA	BB	AB	AA
933	AX-89825241	AA	BB	BB	BB	AB	AB	BB	AB	BB	AB	BB	BB	BB	BB	BB	BB	BB	BB	BB	BB	AB	BB	BB	BB	BB	BB	BB	BB	BB	NC	BB	AB	BB	BB	BB	BB		BB	BB	BB	BB	BB	BB	BB	BB	BB	BB	BB
934	AX-89825376	BB	AB	AB	BB	AB	BB	AA	BB	AA	BB	AA	AA	AA	BB	AA	AA	AB	AA	AA	AA	BB	AB	AA	AA	AA	AA	AA	AA	AB	AA	AA	AA	AA	BB	BB	AA		AB	AB	AA	AB	AA	AA	AA	AA	AB	AB	AA
935	AX-89825358	AA	AB	AB	AA	AA	AA	AA	AA	AA	AA	AA	AA	AA	AA	AA	AA	AB	AA	AA	AA	AB	AB	AA	AA	AA	AA	AA	AA	AB	AA	AA	AA	AA	AA	AA	AA		AB	AB	AA	AB	AA	AA	AA	AA	AB	AB	AA
936	AX-89785566	AA	BB	BB	NC	AB	AB	BB	AA	BB	AB	BB	BB	BB	AA	BB	BB	BB	BB	BB	BB	AB	BB	BB	BB	BB	BB	BB	BB	BB	NC	BB	AB	BB	AA	BB	BB		BB	BB	BB	BB	BB	BB	BB	BB	BB	BB	BB
937	AX-89826194	AB	BB	AB	BB	AA	BB	AA	AB	AA	AB	AB	AB	AB	AA	AA	BB	AB	NC	BB	AA	AB	AB	AA	AB	BB	AB	AA	BB	AA	AB	AB	AA	AB	BB	AB	AB		AB	BB	AB	AB	BB	BB	AB	AB	AB	AA	AB
938	AX-89904764	BB	AA	AB	BB	BB	BB	AB	AB	BB	BB	AB	BB	AB	BB	AB	AA	AB	BB	AB	AB	AB	AB	BB	AB	AB	AA	AB	AB	AB	AB	AA	BB	AB	BB	BB	AA		BB	NC	AB	BB	AB	BB	AB	AB	BB	BB	AB
939	AX-89824808	BB	BB	AB	BB	NC	BB	AB	BB	AA	BB	BB	AB	AB	BB	AB	BB	AB	AA	BB	AB	BB	AB	AA	AB	BB	BB	AB	BB	AB	AB	BB	AB	AB	BB	BB	BB		AB	BB	BB	AB	BB	AB	AB	AB	AB	AA	AB
940	AX-89881877	AB	AB	AB	BB	AA	AB	AA	BB	AA	AB	AA	AA	AA	BB	AA	AB	AA	AA	AA	AA	AA	AA	AA	AA	AB	AA	AA	AA	AA	NC	AA	AA	AB	BB	AA	AA		AA	AB	AA	AA	AB	AA	AB	AB	AA	AA	AB
941	AX-89784910	BB	AB	AB	AB	AA	BB	AA	AB	AA	BB	AA	AA	AA	AB	AA	AB	AA	AA	AA	AA	AA	AA	AA	AA	AB	AA	AA	AA	AA	NC	AA	AA	AB	BB	AB	AA		AA	AB	AA	AA	AB	AA	AB	AB	AA	AA	AB
942	AX-89881716	BB	AB	AB	AB	AA	BB	AA	AA	AA	AA	AA	AA	AA	BB	AA	AB	AA	AA	AA	AA	AA	AA	AA	AA	AB	AA	AA	AA	AA	NC	AA	AA	AB	AA	BB	AA		AA	AB	AA	AA	AB	AA	AB	AB	AA	AA	AB
943	AX-89824766	AA	AB	AB	BB	BB	BB	BB	BB	BB	BB	BB	BB	BB	BB	BB	AB	BB	BB	BB	BB	BB	BB	BB	BB	AB	BB	BB	BB	BB	NC	BB	BB	AB	BB	BB	BB		BB	AB	BB	BB	AB	BB	AB	AB	BB	BB	AB
944	AX-89847796	AB	BB	AB	AB	AA	AA	AB	AB	AA	BB	AB	AA	AB	BB	AB	BB	AB	AA	NC	AB	AB	AB	AA	AB	AB	BB	AB	AB	AB	AB	BB	AA	AB	AA	AA	BB		AA	NC	AB	AA	AB	AA	AB	AB	AA	AA	AB
945	AX-89803968	BB	AB	AB	BB	BB	BB	BB	AB	BB	BB	BB	BB	BB	AB	BB	AB	BB	BB	BB	BB	BB	BB	BB	BB	AB	BB	BB	BB	BB	NC	BB	BB	AB	AB	BB	BB		BB	AB	BB	BB	AB	BB	AB	AB	BB	BB	AB
946	AX-89826278	AA	BB	AB	AB	AA	AA	AB	AB	AA	AA	BB	AB	NC	AB	AB	BB	AB	AA	BB	NC	AB	AB	AA	NC	BB	BB	AA	BB	AB	NC	BB	AA	AB	AB	AB	BB		AB	BB	BB	AB	BB	AB	AB	AB	AB	AA	AB
947	AX-89784924	AB	AB	AB	BB	BB	AB	BB	BB	BB	AB	BB	BB	BB	BB	BB	AB	BB	BB	BB	BB	BB	BB	BB	BB	AB	BB	BB	BB	BB	NC	BB	BB	AB	BB	AA	BB		BB	AB	BB	BB	AB	BB	AB	AB	BB	BB	AB
948	AX-89904769	AB	BB	AB	BB	AA	BB	AB	BB	AA	BB	AB	AA	AB	AB	AB	BB	AB	AA	AB	AB	AB	AB	AA	AB	AB	BB	AB	AB	AB	AB	AB	AA	AB	AB	AB	BB		AA	NC	AB	AA	AB	AA	AA	AB	AA	AA	AB
949	AX-89827018	AB	AB	AB	AB	AA	AB	AA	AB	AA	BB	AA	AA	AA	AB	AA	AB	AA	AA	AA	AA	AA	AA	AA	AA	AB	AA	AA	AA	AA	NC	AA	AA	AB	BB	BB	AA		AA	AB	AA	AA	AB	AA	AA	AB	AA	AA	AB
950	AX-89824636	BB	AB	AB	AB	BB	AB	BB	BB	BB	AB	BB	BB	BB	AB	BB	AB	BB	BB	BB	BB	BB	BB	BB	BB	AB	BB	BB	BB	BB	NC	BB	BB	AB	AB	BB	BB		BB	AB	BB	BB	AB	BB	BB	AB	BB	BB	AB
951	AX-89826033	AB	AB	AA	BB	AA	BB	AA	BB	AA	BB	AB	AA	AB	BB	AB	AB	AA	AA	AB	AB	AB	AB	AA	AB	AA	NC	AB	AB	AB	AB	AA	AA	AB	BB	AB	AB		AA	NC	NC	AA	AA	AA	AA	AA	AA	AA	AA
952	AX-89786956	AA	AB	AB	AA	BB	AA	BB	AA	BB	AA	BB	BB	NC	AA	BB	AB	BB	BB	BB	BB	BB	BB	BB	BB	AB	BB	BB	BB	BB	NC	BB	BB	AB	AA	AA	BB		BB	AB	BB	BB	AB	BB	BB	AB	BB	BB	AB
953	AX-89785036	AB	AB	AB	AB	BB	AA	BB	BB	BB	AA	BB	BB	BB	AB	BB	AB	BB	BB	BB	BB	BB	BB	BB	BB	AB	BB	BB	BB	BB	NC	BB	BB	AB	AA	AA	BB		BB	AB	BB	BB	AB	BB	BB	AB	BB	BB	AB
954	AX-89904780	AB	AB	AB	AA	BB	AA	BB	AA	BB	AA	BB	BB	BB	AA	BB	AB	BB	BB	BB	BB	BB	BB	BB	BB	AB	BB	BB	BB	BB	NC	BB	BB	AB	AA	AA	BB		BB	AB	BB	BB	AB	BB	BB	AB	BB	BB	AB
955	AX-89784974	AB	BB	AB	AB	AB	AB	AB	AB	BB	AB	AA	AB	AB	NC	AB	BB	BB	AB	AB	AB	BB	AB	AB	BB	AB	AB	AB	AB	AB	BB	AA	AB	AB	AB	AB	AB		AA	AB	AA	AA	AB	AB	AB	BB	AA	AB	BB
956	AX-89786140	AA	AB	AB	AB	AA	BB	AA	BB	AA	AA	AA	AA	AA	NC	AA	AB	AA	AA	AA	AA	AA	AA	AA	AA	AB	AA	AA	AA	AA	NC	AA	AA	AB	AB	AB	AA		AA	AB	AA	AA	AB	AA	AA	AB	AA	AA	AB
957	AX-89786152	AA	AB	AA	AA	AA	AA	NC	AB	AA	AA	AB	AA	AB	NC	AB	AB	AB	AA	AB	AB	AB	AB	AA	AB	AA	NC	AB	AB	AB	AB	AB	AA	AA	AA	AA	AB		AA	NC	NC	AA	AA	AA	AA	AA	AA	AA	AA
958	AX-89784604	AB	AB	AB	AB	AB	AB	BB	AB	AB	BB	BB	AB	AB	BB	BB	AB	AA	AA	BB	BB	BB	AB	AB	AB	BB	BB	BB	AB	AB	AA	BB	AB	AB	BB	AB	BB		BB	BB	BB	AB	AB	AB	AB	AB	AB	BB	BB
959	AX-89824257	AB	AA	AA	AB	AB	AB	AA	BB	AB	AA	AA	AA	AA	AB	AA	AA	AA	NC	AA	AA	AA	AA	AB	AA	AA	AA	AA	AA	AA	NC	AA	AB	AA	AB	AB	AA		AA	AA	AA	AA	AA	AA	AA	AA	AA	AA	AA
960	AX-89824308	BB	BB	BB	BB	AB	BB	BB	AB	AB	BB	BB	BB	BB	BB	BB	BB	BB	AB	BB	BB	BB	BB	AB	BB	BB	BB	BB	BB	BB	NC	BB	AB	BB	AA	BB	BB		BB	BB	BB	BB	BB	BB	BB	BB	BB	BB	BB
961	AX-89784689	AB	AB	BB	AB	AB	BB	AB	AA	BB	AB	AB	BB	BB	AB	NC	BB	BB	BB	AB	AB	AA	AB	BB	AB	AB	AA	AB	BB	AB	BB	AA	AB	BB	AA	BB	AA		BB	NC	NC	BB	BB	BB	BB	BB	BB	NC	BB
962	AX-89904738	AB	BB	BB	AA	AB	AB	BB	AA	AB	AA	BB	BB	BB	BB	BB	BB	BB	AA	BB	BB	BB	BB	AB	BB	BB	BB	BB	BB	BB	AA	BB	AB	BB	AB	BB	BB		BB	BB	BB	BB	BB	BB	BB	BB	BB	BB	BB
963	AX-89824473	AA	BB	BB	AA	AB	AA	BB	AA	AB	AB	BB	BB	AA	BB	BB	BB	BB	NC	BB	BB	BB	BB	AB	BB	BB	BB	BB	BB	BB	NC	BB	AB	BB	AA	AA	BB		BB	BB	BB	BB	BB	BB	BB	BB	BB	BB	BB
964	AX-89824634	BB	AB	AB	AB	AA	AB	BB	AB	AB	AB	BB	BB	AB	BB	BB	BB	AA	AA	AB	AB	BB	AB	AB	AB	BB	BB	BB	BB	AB	AB	BB	AB	BB	AB	AA	BB		BB	BB	BB	AB	AB	AB	AB	AB	AB	BB	BB
965	AX-89785000	AA	AB	AB	AB	AB	BB	BB	AB	AB	AB	BB	BB	AB	AB	BB	BB	AA	AA	AB	AB	BB	AB	AB	AB	BB	BB	BB	BB	AB	AB	BB	AB	BB	AA	AB	BB		BB	BB	BB	AB	AB	AB	AB	AB	AB	BB	BB
966	AX-89786155	BB	AB	AB	AA	AA	AA	BB	AB	AB	AA	BB	BB	NC	AA	BB	BB	AA	AA	AB	AB	BB	AB	AB	AB	BB	BB	BB	BB	AB	AB	BB	AB	BB	BB	AA	BB		BB	BB	BB	AB	AB	AB	AB	AB	AB	BB	BB
967	AX-89785636	BB	BB	BB	BB	BB	BB	AB	BB	BB	BB	AB	AB	BB	BB	BB	AB	BB	BB	BB	AB	AB	BB	AB	BB	BB	BB	AB	AB	AB	BB	AB	AB	AB	BB	BB	AB		AB	BB	NC	BB	BB	AB	AB	AB	AB	BB	BB
968	AX-89847885	AB	BB	BB	AA	BB	AA	BB	AA	AB	AA	BB	BB	AB	AA	BB	BB	BB	AB	AB	AB	BB	BB	BB	BB	BB	BB	BB	BB	BB	AB	BB	BB	BB	AA	AA	BB		BB	BB	BB	BB	BB	BB	BB	BB	BB	BB	BB
969	AX-89785650	BB	BB	BB	BB	BB	AB	BB	BB	AB	AA	BB	BB	AB	AB	BB	BB	BB	AB	AB	AB	BB	BB	BB	NC	BB	BB	BB	BB	BB	NC	BB	BB	BB	AB	BB	BB		BB	BB	BB	BB	BB	BB	BB	BB	BB	BB	BB
970	AX-89825059	AB	AA	AA	BB	AA	AA	AA	AB	AB	AA	AA	AA	BB	BB	AA	AA	AA	AB	AB	AB	AA	AA	AA	AA	AA	AA	AA	AA	AA	NC	AA	AA	AA	AA	AB	AA		AA	AA	AA	AA	AA	AA	AA	AA	AA	AA	AA
971	AX-89825058	AB	BB	BB	BB	BB	AB	AB	AB	BB	AB	AB	AB	BB	BB	BB	AB	BB	BB	BB	AB	AA	BB	AB	BB	BB	BB	AB	AA	AB	BB	AB	AB	AB	BB	AA	AB		AB	BB	AB	BB	BB	NC	NC	AB	AB	BB	BB
972	AX-89785327	NC	BB	BB	BB	BB	BB	AB	BB	BB	BB	AA	AB	BB	BB	BB	AB	BB	BB	BB	AB	AA	BB	AB	NC	BB	BB	AB	AA	AB	BB	AB	AB	AB	BB	BB	AB		AB	BB	AB	BB	BB	AB	AB	AB	AB	BB	BB
973	AX-89785296	BB	BB	BB	BB	BB	BB	AB	BB	BB	BB	NC	AB	BB	BB	BB	AB	BB	BB	BB	AB	AA	BB	AB	BB	BB	BB	AB	AA	AB	BB	AB	AB	AB	BB	BB	AB		AB	BB	AB	BB	BB	AB	AB	AB	AB	BB	BB
974	AX-89824958	BB	BB	BB	BB	BB	BB	AB	AB	BB	BB	AA	AB	BB	BB	BB	AB	BB	BB	BB	AB	AA	BB	AB	BB	BB	BB	AB	AA	AB	BB	AB	AB	AB	BB	BB	AB		AB	BB	AB	BB	BB	AB	AB	AB	AB	BB	BB
975	AX-89847840	AB	BB	BB	AB	BB	AA	AB	BB	BB	AA	AA	AB	AB	AB	BB	AB	BB	BB	BB	AB	AA	BB	AB	BB	BB	BB	AB	AA	AB	AB	AB	AB	AB	AA	AB	AB		AB	BB	AB	BB	BB	AB	AB	AB	AB	BB	BB
976	AX-89847823	AB	AA	AA	AB	AA	BB	AB	AB	AA	AA	BB	AB	AB	AA	AA	AB	AA	AA	AA	AB	BB	AA	AB	AA	AA	AA	AB	BB	AB	AB	AB	AB	AB	BB	NC	AB		AB	AA	AB	AA	AA	AB	AB	AB	AB	AA	AA
977	AX-89785194	AA	AA	AA	AA	AA	AA	AB	AA	AA	AA	BB	AB	AA	AA	AA	AB	AA	AA	AA	AB	BB	AA	AB	AA	AA	AA	AB	BB	AB	AA	AB	AB	AB	AA	AA	AB		AB	AA	AB	AA	AA	AB	AB	AB	AB	AA	AA
978	AX-89786447	AB	BB	BB	AA	BB	AB	AB	AA	BB	AB	AB	AB	BB	BB	BB	AB	BB	BB	BB	AB	AB	BB	AB	BB	BB	BB	AB	AB	AB	NC	AB	AB	AB	AB	AB	AB		AB	BB	AB	BB	BB	AB	AB	AB	AB	BB	BB
979	AX-89904967	BB	BB	BB	BB	AB	BB	AB	AB	BB	BB	AA	AB	BB	BB	AB	BB	BB	AB	AB	AA	AA	BB	AB	AB	BB	BB	AB	AA	AB	BB	AA	AB	AB	BB	BB	AB		AB	BB	AB	BB	BB	AB	AB	AB	AB	BB	BB
980	AX-89861158	BB	BB	BB	AA	NC	AB	AB	BB	BB	AB	AB	AB	NC	BB	AB	BB	BB	AB	AB	NC	AA	BB	AB	BB	BB	BB	AB	AB	AB	AB	AA	AB	AA	AB	AB	AB		AB	BB	AB	AB	AB	AB	AB	AB	AB	BB	AB
981	AX-89786796	AB	BB	BB	AA	AB	NC	AB	AA	BB	AA	AB	AA	AB	AA	AB	BB	BB	AB	AB	AA	AA	BB	AB	BB	BB	BB	AB	AA	AB	AB	AA	AB	AA	AA	AB	AB		AB	NC	AB	AB	AB	AB	AB	AB	AB	NC	AB
982	AX-89786777	BB	AA	AA	BB	AB	BB	AB	BB	AA	BB	AB	BB	AB	BB	AA	NC	AA	AB	AB	BB	AB	AA	AB	AA	AA	AB	AB	BB	AA	AB	BB	AB	AB	BB	BB	AB		AB	NC	AB	AB	AB	AB	AB	AB	AB	NC	AB
983	AX-89786429	BB	BB	BB	NC	AB	AB	AB	BB	BB	AB	AB	AA	AB	AB	AB	BB	BB	AB	AB	AA	AA	BB	AB	BB	BB	BB	AB	AA	AB	AB	AA	AB	AA	AB	AB	AB		AB	NC	AB	AB	AB	AB	AB	AB	AB	NC	AB
984	AX-89826985	BB	AA	AA	BB	AB	BB	AB	BB	AA	BB	BB	AB	AA	BB	AB	AA	NC	AB	AB	BB	BB	AA	AB	AA	AA	AA	AB	BB	AB	AA	NC	AB	AB	BB	BB	AB		AB	AA	AB	AA	AA	AB	AB	AB	AB	AA	AA
985	AX-89883941	AB	AA	AA	BB	AA	AB	NC	BB	AA	AB	AB	AB	AA	AA	AA	AA	AA	AA	AB	AB	AB	AA	AB	AA	AA	AA	AB	AB	AB	AA	AB	AA	AA	AB	BB	AB		AB	AA	AB	AA	AA	AB	AB	AB	AB	AA	AA
986	AX-89786760	AB	AA	AA	BB	AA	BB	AB	AB	AA	BB	AB	AA	AA	BB	AA	AA	AA	AA	AA	AA	AB	AA	AA	AA	AA	AA	AA	AA	AB	NC	NC	AA	AA	BB	AB	AA		NC	AA	NC	AA	AA	NC	NC	NC	NC	AA	AA
987	AX-89826983	AB	BB	BB	AB	AB	AB	BB	BB	BB	AB	BB	BB	BB	AB	AB	BB	BB	AB	BB	BB	AB	BB	BB	BB	BB	BB	BB	BB	BB	NC	AB	AB	AB	AB	AB	BB		BB	BB	BB	BB	BB	BB	BB	BB	BB	BB	BB
988	AX-89861161	BB	BB	BB	BB	AB	BB	BB	AB	BB	BB	BB	BB	BB	BB	AB	BB	BB	AB	BB	BB	AB	BB	BB	BB	BB	BB	BB	BB	BB	NC	AB	AB	AB	BB	BB	BB		BB	BB	BB	BB	BB	BB	BB	BB	BB	BB	BB
989	AX-89826909	BB	AA	AA	BB	AB	BB	AA	BB	AA	BB	AA	AA	NC	BB	AB	AA	AA	AB	AA	AA	AB	AA	AA	AA	AA	AA	AA	AA	AA	AA	AB	AB	AB	BB	BB	AA		AA	AA	AA	AA	AA	AA	AA	AA	AA	AA	AA
990	AX-89826434	AB	BB	BB	BB	BB	BB	AB	AB	BB	BB	AB	AB	BB	AB	BB	BB	BB	BB	AB	AB	AB	BB	AB	NC	BB	BB	AB	AB	AB	NC	AB	NC	BB	BB	BB	AB		AB	BB	AB	BB	BB	AB	AB	AB	AB	BB	BB
991	AX-89786793	BB	BB	BB	AB	BB	BB	AB	AB	BB	AB	AB	AB	BB	BB	BB	BB	BB	BB	AB	AB	AB	BB	AB	BB	BB	BB	AB	AB	AB	NC	AB	BB	BB	BB	BB	AB		AB	BB	AB	BB	BB	AB	AB	AB	AB	BB	BB
992	AX-89872468	BB	AB	AB	BB	BB	BB	NC	BB	BB	BB	AB	AA	AB	BB	AB	AB	AA	BB	BB	BB	AB	AB	BB	AB	AB	AB	BB	AB	AB	BB	BB	AB	AB	BB	BB	BB		AA	AB	AA	AB	AA	AA	AB	AB	AA	AB	AB
993	AX-89784116	AA	AB	AB	AA	AB	AA	BB	AA	AA	AA	BB	BB	AB	NC	AB	AB	BB	BB	AB	BB	BB	AB	AB	BB	AB	AB	BB	BB	AB	AB	BB	AB	BB	AA	AA	AB		BB	BB	BB	AB	BB	AB	AB	BB	BB	AB	AB
994	AX-89828401	AA	AB	AB	BB	AB	AA	AA	BB	BB	BB	AA	AA	AB	NC	AB	AB	AA	AA	AB	AA	AA	AB	AB	NC	AB	AB	AA	AA	AB	AB	AA	AB	AA	AA	BB	AB		AA	AA	AA	AB	AA	AB	AB	AA	AA	AB	AB
995	AX-89823893	BB	AB	AB	BB	AB	BB	AA	BB	BB	BB	AA	AA	AB	BB	AB	AB	AB	AA	AB	AA	AA	AB	AB	AA	AB	AB	AA	AA	AB	AB	AA	AB	AA	BB	BB	AB		AA	AA	AA	AB	AA	AB	AB	AA	AA	AB	AB
996	AX-89784395	AB	AB	AB	BB	AB	BB	AA	AB	BB	BB	AA	AA	AB	NC	AB	AB	AA	AA	AB	AA	AA	AB	AB	AA	AB	AB	AA	AA	AB	AB	AA	AB	AA	BB	BB	AB		AA	AA	AA	AB	AA	AB	AB	AA	AA	AB	AB
997	AX-89784509	AA	BB	BB	AB	AB	AB	AA	BB	BB	AB	AB	BB	BB	BB	BB	BB	BB	AA	AB	AA	AB	BB	AB	NC	BB	BB	AA	AB	BB	NC	AA	BB	AB	AA	AB	AB		BB	NC	BB	BB	BB	BB	BB	NC	BB	BB	BB
998	AX-89827786	BB	BB	BB	AA	AB	BB	AA	AB	BB	AB	AB	BB	BB	AB	BB	BB	BB	AA	AB	AA	AB	BB	AB	AB	BB	BB	AA	AB	BB	AB	AA	BB	AB	AB	AB	AB		BB	NC	BB	BB	BB	BB	BB	NC	BB	BB	BB
999	AX-89827155	AB	BB	BB	BB	AB	BB	AA	BB	BB	AB	AB	BB	BB	AB	BB	BB	BB	AB	AB	AA	AB	BB	AB	AB	BB	BB	AB	AB	BB	AB	AA	BB	AB	BB	BB	AB		BB	NC	BB	BB	BB	BB	BB	NC	BB	BB	BB
1000	AX-89827488	BB	BB	BB	BB	AB	BB	AA	BB	BB	BB	AB	BB	NC	BB	BB	BB	BB	NC	AB	AA	AB	BB	AB	AB	BB	BB	AA	AB	BB	AB	AA	BB	AB	BB	BB	AB		BB	NC	BB	BB	BB	BB	BB	NC	BB	BB	BB
1001	AX-89827249	AB	AA	AA	AA	AB	AA	BB	AB	AA	AA	AB	AA	AA	AA	AA	AA	AA	BB	AB	BB	AB	AA	AB	AB	AA	AA	BB	AB	AA	AB	BB	AA	AB	AB	AA	AB		AA	NC	AA	AA	AA	AA	AA	NC	AA	AA	AA
1002	AX-89788019	AB	AA	AA	AB	AB	AA	BB	AA	AA	BB	AB	AA	AA	AA	AA	AA	AA	BB	AB	BB	AB	AA	AB	AB	AA	AA	BB	AB	AA	AB	BB	AA	AB	AA	AA	AB		AA	NC	AA	AA	AA	AA	AA	NC	AA	AA	AA
1003	AX-89823851	AB	AA	AA	AB	AB	AA	BB	AA	AA	AA	AB	AA	AA	AA	AA	AA	AA	BB	AB	BB	AB	AA	AB	AB	AA	AA	BB	AB	AA	AB	BB	AA	AB	AA	AA	AB		AA	NC	AA	AA	AA	AA	AA	NC	AA	AA	AA
1004	AX-89784627	AB	BB	BB	AB	AB	AB	AA	AB	BB	BB	AB	BB	BB	AB	BB	BB	BB	AA	AB	AA	AB	BB	AB	AB	BB	BB	AA	AB	BB	AB	AA	BB	AB	BB	AB	AB		BB	NC	BB	BB	BB	BB	BB	NC	BB	BB	BB
1005	AX-89784660	AB	BB	BB	AA	AB	AA	AA	AB	BB	AB	AB	BB	BB	AB	BB	BB	BB	AA	AB	AA	AB	BB	AB	AB	BB	BB	AA	AB	BB	AB	AA	BB	AB	BB	AB	AB		BB	NC	BB	BB	BB	BB	BB	NC	BB	BB	BB
1006	AX-89784630	AB	AA	AA	AB	AB	AB	NC	AB	AA	AA	AB	AA	AA	AB	AA	AA	AA	BB	AB	BB	AB	AA	AB	AB	AA	AA	BB	AB	AA	AB	BB	AA	AB	AA	AB	AB		AA	NC	AA	AA	AA	AA	AA	NC	AA	AA	AA
1007	AX-89824251	AA	AA	AA	BB	AB	AB	BB	AB	AA	AB	AB	AA	AA	AB	AA	AA	AA	BB	AB	AB	AB	AA	AB	AB	AA	AA	BB	AB	AA	AB	NC	AA	AB	AA	AB	AB		AA	NC	AA	AA	AA	AA	AA	NC	AA	AA	AA
1008	AX-89880723	AA	AA	AA	AA	AB	AA	AB	AB	AA	AA	AB	AA	AA	AA	AA	AA	AA	AB	AB	AB	AB	AA	AB	AB	AA	AA	AB	AB	AA	AB	AB	AA	AB	AA	AA	AB		AA	NC	AA	AA	AA	AA	AA	NC	AA	AA	AA
1009	AX-89826249	AA	AB	AB	AB	AA	AA	AA	BB	AA	BB	AB	BB	AB	NC	AB	AB	BB	BB	AA	AA	AB	AB	AA	AB	AB	AB	AA	AB	AB	AB	AA	AB	AB	AB	AB	AA		BB	BB	BB	AB	BB	BB	AB	BB	BB	AB	AB
1010	AX-89851954	AA	AB	AB	AA	BB	AA	BB	AA	BB	AA	AB	AA	AB	AA	AB	AB	AA	AA	BB	BB	AB	AB	BB	AB	AB	AB	BB	AB	AB	AB	BB	AB	AB	AA	AA	BB		AA	AA	AA	AB	AA	AA	AB	AA	AA	AB	AB
1011	AX-89882969	AA	AB	AB	AA	BB	AA	BB	AA	BB	AA	AB	AA	AB	AB	AB	AB	AA	AA	BB	BB	AB	AB	BB	AB	AB	NC	BB	AB	AB	AB	BB	AB	AB	AA	AA	BB		AA	AA	AA	AB	AA	AA	AB	AA	AA	AB	AB
1012	AX-89825975	AA	AB	AB	AB	BB	AA	BB	BB	BB	BB	AB	AA	AB	AB	AB	AB	AB	AA	BB	BB	BB	AB	BB	AB	AB	BB	BB	AB	AB	AB	BB	BB	AB	AA	AB	BB		AA	AA	AB	AB	AA	AA	AB	AA	AA	AB	AB
1013	AX-89882614	BB	AB	AB	BB	BB	AB	BB	BB	BB	BB	AB	AA	AB	BB	AB	AB	AA	AA	BB	BB	BB	AB	BB	AB	AB	BB	BB	AB	AB	AB	BB	BB	AB	BB	AA	BB		AA	AA	AB	AB	AA	AA	AB	AA	AA	AB	AB
1014	AX-89867918	AA	AB	AB	BB	BB	AA	NC	AB	BB	AB	AB	AA	AB	AB	AB	AB	AB	AB	BB	BB	BB	AB	BB	AB	AB	BB	BB	AB	AB	AB	BB	BB	AB	AA	AA	BB		AA	AA	AB	NC	AA	AA	AB	AA	AA	AB	AB
1015	AX-89785383	AA	AB	AB	AA	AB	AA	BB	AA	BB	AA	AB	AA	AB	AA	AB	AB	AA	AA	BB	BB	AB	AB	BB	AB	AB	AB	BB	AB	AB	AB	BB	AB	AB	AA	AA	BB		AA	AA	AA	AB	AA	AA	AB	AA	AA	AB	AB
1016	AX-89824596	AB	AB	AB	AA	AB	AB	BB	AB	BB	BB	BB	BB	AB	NC	BB	AB	AA	BB	BB	BB	AB	AB	BB	AB	BB	AB	BB	BB	AB	BB	BB	AB	AB	BB	BB	BB		AB	AB	AB	BB	AB	AB	AB	AB	AB	AB	BB
1017	AX-89827308	AB	AB	AB	AA	AB	BB	BB	AA	BB	AB	BB	BB	NC	BB	BB	AB	AA	BB	BB	BB	AB	AB	BB	AB	BB	AB	BB	BB	AB	BB	BB	AB	AB	AB	AB	BB		AB	AB	AB	BB	AB	AB	AB	AB	AB	AB	BB
1018	AX-89807273	AB	AA	AA	AA	AB	AA	AA	AA	AA	AB	AA	AA	AA	AA	AA	AA	AA	AA	AA	AA	AA	AA	AA	AA	AA	AA	AA	AA	AA	NC	AA	AA	AA	AB	AB	AA		AA	AA	AA	AA	AA	AA	AA	AA	AA	AA	AA
1019	AX-89784782	AB	AB	AB	BB	AB	AB	AA	AB	AA	BB	AA	AA	AB	AB	AA	AB	NC	AA	AA	AA	AB	AB	AA	AB	AA	AB	AA	AA	AB	AA	AA	AB	AB	BB	AB	AA		AB	AB	AB	AA	AB	AB	AB	AB	AB	AB	AA
1020	AX-89787152	AB	BB	BB	BB	AB	BB	BB	BB	BB	BB	BB	BB	BB	BB	BB	BB	BB	BB	BB	BB	BB	BB	BB	BB	BB	BB	BB	BB	BB	NC	BB	BB	BB	AB	BB	BB		BB	BB	BB	BB	BB	BB	BB	BB	BB	BB	BB
1021	AX-89848169	AA	AB	AB	AA	AB	AA	AA	AA	AA	AA	AA	AA	AB	AA	AA	AB	BB	AA	AA	AA	AB	AB	AA	AB	AA	AB	AA	AA	AB	AA	AA	AB	AB	AA	AA	AA		AB	AA	AB	AB	AB	AB	AB	AB	AB	AA	AA
1022	AX-89827611	BB	AB	AB	AB	BB	AB	BB	BB	BB	AB	BB	BB	AB	AA	BB	AB	AB	BB	BB	BB	BB	AB	BB	AB	BB	BB	BB	BB	AB	NC	BB	BB	AB	AB	AA	BB		AB	BB	BB	AB	AB	AB	AB	AB	AB	BB	BB
1023	AX-89787443	AA	AA	AA	AA	AB	AA	BB	AA	AB	AA	AB	AA	AB	AA	AA	AB	AB	BB	AB	BB	BB	AB	BB	AB	AA	BB	AB	AB	AB	BB	BB	BB	AB	AA	AA	AB		AA	AA	NC	AA	AA	AA	AA	AA	AA	AA	AA
1024	AX-89787447	AB	BB	BB	AA	BB	AA	BB	AB	BB	AA	BB	BB	BB	AA	BB	BB	AB	BB	BB	BB	BB	BB	BB	BB	BB	BB	BB	BB	BB	NC	BB	BB	BB	AB	AB	BB		BB	BB	BB	BB	BB	BB	BB	BB	BB	BB	BB
1025	AX-89868066	BB	BB	BB	AA	AB	AA	AA	AA	AB	AA	AB	BB	AB	AB	BB	AB	BB	AA	AB	AA	AA	AB	AA	AB	BB	AA	AB	AB	AB	AA	NC	AA	AB	AA	AA	AB		BB	BB	NC	BB	BB	BB	BB	BB	BB	BB	BB
1026	AX-89787453	BB	AA	AA	BB	AB	BB	BB	BB	BB	BB	AB	AB	NC	BB	AA	BB	AA	BB	BB	BB	BB	AB	BB	BB	AB	BB	BB	BB	AB	BB	BB	BB	AB	BB	BB	BB		AA	AA	AB	AA	AA	AA	AA	AA	AA	AA	AA
1027	AX-89787896	AB	AB	AB	AA	AB	AA	BB	AB	AB	AA	BB	BB	BB	AA	AB	BB	BB	BB	AB	BB	BB	BB	BB	BB	AB	BB	BB	BB	BB	NC	BB	BB	BB	AB	AB	AB		BB	AB	BB	BB	BB	BB	AB	BB	BB	AB	AB
1028	AX-89828275	AA	AB	AB	AB	AB	AB	AA	AB	AB	AB	AB	BB	AA	AB	BB	AA	AB	AA	AB	AA	AA	AA	AA	AA	BB	AA	AB	AB	AA	AA	AA	NC	AA	AB	AB	AB		AB	BB	AB	AB	AB	AB	AB	AB	AB	BB	BB
1029	AX-89828280	BB	AB	AB	AB	AB	AB	AA	AB	AB	AB	AA	AA	AA	AB	AB	AA	AA	AA	AB	AA	AA	AA	AA	AA	AB	AA	AA	AA	AA	AA	AA	AA	AA	AB	AB	AB		AA	AB	AA	AA	AA	AA	AB	AA	AA	AB	AB
1030	AX-89905055	NC	AB	AB	BB	AB	AB	NC	AB	AB	AB	AA	AA	AA	AB	AB	AA	AB	AA	AB	AA	AA	AA	AA	AA	AB	AA	AA	AA	AA	AA	AA	AA	AA	AB	BB	AB		AA	AB	AA	AA	AA	AA	AB	AA	AA	AB	AB
1031	AX-89787489	AB	AB	AB	AB	AB	BB	AA	AB	AB	AA	AA	AA	NC	BB	AB	AA	AA	AA	AB	AA	AA	AA	AA	AA	AB	AA	AA	AA	AA	AA	AA	AA	AA	BB	BB	AB		AA	AB	AA	AA	AA	AA	AB	AA	AA	AB	AB
1032	AX-89828140	BB	AB	AB	AB	AA	BB	AA	AB	AB	BB	AA	AA	AA	AB	AB	AA	AA	AA	AB	AA	AA	AA	AA	AA	AB	AA	AA	AA	AA	AA	AA	AA	AA	AB	AB	AB		AA	AB	AA	AA	AA	AA	AB	AA	AA	AB	AB
1033	AX-89828144	AA	AB	AB	AB	AA	AA	AA	AB	AB	AB	AA	AA	AA	NC	AB	AA	AA	AA	AB	AA	AA	AA	AA	AA	AB	AA	AA	AA	AA	AA	AA	AA	AA	AA	AA	AB		AA	AB	AA	AA	AA	AA	AB	AA	AA	AB	AB
1034	AX-89828095	AA	AB	AB	BB	BB	AB	BB	AB	AB	AA	BB	BB	BB	AB	AB	BB	AB	BB	AB	BB	BB	BB	BB	BB	AB	BB	BB	BB	BB	BB	BB	BB	BB	BB	AB	AB		BB	AB	BB	BB	BB	BB	BB	BB	BB	AB	AB
1035	AX-89787780	BB	AB	AB	BB	BB	BB	BB	AB	AB	BB	BB	BB	BB	AB	AB	BB	AB	BB	NC	BB	BB	BB	BB	BB	AB	BB	BB	BB	BB	BB	BB	BB	BB	BB	BB	AB		BB	AB	BB	BB	BB	BB	BB	BB	BB	AB	AB
1036	AX-89828056	BB	AB	AB	AB	BB	BB	BB	AB	AB	BB	BB	BB	BB	AB	AB	BB	BB	BB	AB	BB	BB	BB	BB	BB	AB	BB	BB	BB	BB	BB	BB	BB	BB	AB	AB	AB		BB	AB	BB	BB	BB	BB	BB	BB	BB	AB	AB
1037	AX-89787765	AB	AB	AB	AB	BB	AB	BB	BB	AB	BB	BB	BB	NC	BB	AB	BB	AB	BB	AB	NC	BB	BB	BB	BB	AB	BB	BB	BB	BB	NC	BB	BB	BB	BB	BB	AB		BB	AB	BB	BB	BB	BB	BB	BB	BB	AB	AB
1038	AX-89787658	AB	NC	NC	AB	BB	BB	BB	AB	BB	AA	BB	BB	BB	BB	AB	BB	NC	BB	BB	BB	BB	BB	BB	BB	BB	BB	BB	BB	BB	BB	BB	BB	BB	BB	BB	BB		BB	AB	BB	BB	BB	BB	BB	BB	BB	AB	AB
1039	AX-89827932	AB	AB	AB	BB	BB	BB	BB	AB	AB	BB	BB	BB	BB	BB	AB	BB	BB	BB	AB	BB	BB	BB	BB	BB	AB	BB	BB	BB	BB	NC	BB	BB	BB	AB	AB	AB		BB	AB	BB	BB	BB	BB	BB	BB	BB	AB	AB
1040	AX-89827953	BB	AB	AB	AB	BB	AB	BB	AA	AB	AB	BB	BB	BB	AB	AB	BB	AB	BB	AB	BB	BB	BB	BB	BB	AB	BB	BB	BB	BB	BB	BB	BB	BB	AA	AB	AB		BB	AB	BB	BB	BB	BB	BB	BB	BB	AB	AB
1041	AX-89827916	AA	AB	AB	AA	BB	AA	BB	AA	AB	AA	BB	BB	BB	NC	AB	BB	AB	BB	AB	BB	BB	BB	BB	BB	AB	BB	BB	BB	BB	BB	BB	BB	BB	AA	AA	AB		BB	AB	BB	BB	BB	BB	BB	BB	BB	AB	AB
1042	AX-89787529	BB	AB	AB	BB	AA	BB	AA	BB	AB	BB	AA	AA	AA	NC	AB	AA	AA	AA	AB	AA	AA	AA	AA	AA	AB	AA	AA	AA	AA	AA	AA	AA	AA	BB	BB	AB		AA	AB	AA	AA	AA	AA	AA	AA	AA	AB	AB
1043	AX-89827975	BB	AB	AB	BB	BB	BB	BB	AB	AB	AB	BB	BB	BB	BB	AB	BB	BB	BB	AB	BB	BB	BB	BB	BB	AB	BB	BB	BB	BB	BB	BB	BB	BB	AB	AB	AB		BB	AB	BB	BB	BB	BB	BB	BB	BB	AB	AB
1044	AX-89787531	BB	AB	AB	BB	AA	BB	AA	BB	AB	BB	AA	AA	AA	BB	AB	AA	AA	AA	AB	AA	AA	AA	AA	AA	AB	AA	AA	AA	AA	AA	AA	AA	AA	BB	BB	AB		AA	AB	AA	AA	AA	AA	AA	AA	AA	AB	AB
1045	AX-89885068	AA	AB	AB	BB	AB	AB	BB	BB	AB	AB	BB	BB	BB	AB	AB	BB	AB	BB	AB	BB	BB	BB	BB	BB	AB	BB	BB	BB	BB	BB	BB	BB	BB	BB	AB	AB		BB	AB	BB	BB	BB	BB	BB	BB	BB	AB	AB
1046	AX-89787752	AA	AB	AB	AB	AA	AA	AA	AB	AB	AA	AA	AA	AA	BB	AB	AA	NC	AA	AB	AA	AA	AA	AA	AA	AB	AA	AA	AA	AA	AA	AA	AA	AA	AA	AB	AB		AA	AB	AA	AA	AA	AA	AA	AA	AA	AB	AB
1047	AX-89848214	AA	AB	AB	AA	BB	AA	BB	AA	AB	AA	BB	BB	BB	AA	AB	BB	AB	BB	AB	BB	BB	BB	BB	BB	AB	BB	BB	BB	BB	BB	BB	BB	BB	AA	AA	AB		BB	AB	BB	BB	BB	BB	BB	BB	BB	AB	AB
1048	AX-89787728	BB	AB	AB	BB	AA	BB	AA	AB	AB	BB	AA	AA	AA	AB	AB	AA	AA	AA	AB	AA	AA	AA	AA	AA	AB	AA	AA	AA	AA	AA	AA	AA	AA	BB	BB	AB		AA	AB	AA	AA	AA	AA	AA	AA	AA	AB	AB
1049	AX-89828039	AA	AB	AB	AB	AA	AA	AA	AB	AB	AA	AA	AA	AA	AB	AB	AA	AA	AA	AB	AA	AA	AA	AA	AA	AB	AA	AA	AA	AA	AA	AA	AA	AA	AB	AB	AB		AA	AB	AA	AA	AA	AA	AA	AA	AA	AB	AB
1050	AX-89827992	AA	AB	AB	AA	BB	AA	BB	AA	AB	AA	BB	BB	BB	NC	AB	BB	AB	BB	AB	BB	BB	BB	BB	BB	AB	BB	BB	BB	BB	BB	BB	BB	BB	AA	AA	AB		BB	AB	BB	BB	BB	BB	BB	BB	BB	AB	AB
1051	AX-89825946	BB	AB	AB	AA	AA	AA	AA	AB	AB	AB	AA	AA	AA	BB	AB	AA	AA	AA	AB	AA	AA	AA	AA	AA	AB	AA	AA	AA	AA	AA	AA	AA	AA	AA	AB	AB		AA	AB	AA	AA	AA	AA	AA	AA	AA	AB	AB
1052	AX-89785914	AB	AB	AB	BB	AB	BB	AA	BB	BB	BB	AA	AA	BB	AB	AB	AB	AB	AB	AB	AA	AA	AB	AA	AA	AB	AA	AA	AA	AA	AB	AA	AA	AA	AB	BB	AB		AB	AB	AA	AB	AA	AB	AB	AB	AA	AB	AB
1053	AX-89785926	BB	AB	AB	BB	AB	BB	AA	BB	BB	BB	AA	AA	AB	BB	AB	AA	AA	AB	AB	AA	AA	AA	AA	AA	AB	AA	AA	AA	AA	AB	AA	AA	AA	BB	BB	AB		AA	AB	AA	AA	AA	AA	AA	AA	AA	AB	AB
1054	AX-89825628	AA	AA	AB	AA	AA	AA	AA	AB	AB	AA	AB	AB	AA	AA	AB	AA	AA	AA	AB	AA	AA	AA	AB	AA	AB	AA	AB	AB	AA	AA	AA	AA	AB	AA	AA	AB		AA	BB	AA	AA	AA	AA	AB	AB	AA	BB	AB
1055	AX-89785782	AB	BB	AB	BB	AB	BB	BB	BB	AA	BB	AB	AB	AB	AB	AB	BB	AB	AB	AB	BB	BB	BB	AB	BB	AB	BB	AB	AB	BB	AB	BB	BB	AB	AB	BB	AB		AB	AA	BB	BB	BB	BB	AB	AB	BB	AA	AB
1056	AX-89828391	AA	AA	AB	AB	AA	AB	AA	AB	AB	AB	AB	AB	AA	AB	AA	AA	AA	AA	AB	AA	AA	AA	AB	AA	AB	AA	BB	AB	AA	AA	AA	AA	AB	AA	AB	AB		AB	BB	AA	AA	AA	AA	AB	AB	AA	BB	AB
1057	AX-89825550	BB	BB	AB	BB	BB	BB	BB	BB	AB	BB	AB	AB	BB	BB	AB	BB	BB	BB	AB	BB	BB	BB	AB	BB	AB	BB	AB	AB	BB	BB	BB	BB	AB	BB	BB	AB		AB	AA	BB	BB	BB	BB	AB	AB	BB	AA	AB
1058	AX-89785851	BB	BB	AB	AB	BB	AB	BB	AB	AB	BB	AB	AB	BB	AB	AB	BB	BB	BB	AB	BB	BB	BB	AB	BB	AB	BB	AB	AB	BB	NC	BB	BB	AB	BB	AB	AB		BB	AA	BB	BB	BB	BB	AB	AB	BB	AA	AB
1059	AX-89786092	AA	AB	AB	BB	BB	BB	BB	AB	AB	BB	BB	BB	BB	BB	AB	BB	BB	BB	AB	BB	BB	BB	BB	BB	AB	BB	BB	BB	BB	BB	BB	BB	BB	AA	BB	AB		BB	AB	BB	BB	BB	BB	BB	BB	BB	AB	AB
1060	AX-89787250	AB	AA	AA	AB	AA	AA	AA	AA	AA	BB	AA	AA	AA	AA	AA	AA	AA	AA	AA	AA	AA	AA	AA	AA	AA	AB	AA	AB	AA	NC	AA	AB	AB	AB	AA	AA		AA	AA	NC	AA	AA	AA	AA	AA	AA	AA	AA
1061	AX-89905008	AA	BB	BB	AA	BB	AA	BB	AB	BB	NC	BB	BB	BB	AA	BB	BB	BB	BB	BB	BB	BB	BB	BB	BB	BB	AB	BB	AB	BB	BB	BB	AB	AB	AA	AA	BB		BB	BB	NC	BB	BB	BB	BB	BB	BB	BB	BB
1062	AX-89787309	AA	BB	BB	AB	BB	AB	BB	AB	BB	AB	BB	BB	BB	NC	BB	BB	BB	BB	BB	BB	BB	BB	BB	BB	BB	AB	BB	AB	BB	BB	BB	AB	AB	AA	AB	BB		BB	BB	NC	BB	BB	BB	BB	BB	BB	BB	BB
1063	AX-89827500	AA	BB	BB	AA	BB	AA	BB	AA	BB	AA	BB	BB	BB	NC	BB	AB	BB	BB	BB	BB	BB	BB	BB	BB	BB	AB	BB	AB	BB	BB	BB	AB	AB	AA	AA	BB		BB	BB	NC	BB	BB	BB	BB	BB	BB	BB	BB
1064	AX-89787175	BB	BB	AB	BB	AB	AB	AB	BB	AB	AB	AA	AB	AB	BB	AA	BB	AB	AB	AB	BB	AB	AB	NC	NC	AB	BB	AB	AB	AA	AB	AA	AB	BB	BB	AB	AB		BB	AB	BB	BB	BB	AB	AB	BB	AB	BB	BB
1065	AX-89904999	AA	AA	AB	AA	AB	AA	AB	AA	AB	AA	BB	AB	AB	AA	BB	AB	AB	AB	AB	AA	AB	AB	AB	AB	AB	AA	AB	AB	BB	AB	BB	AB	AA	AA	AA	AB		AA	AB	AA	AA	AA	AB	AB	AA	AB	AA	AA
1066	AX-89825801	BB	BB	AB	BB	AB	BB	AB	BB	AB	BB	AA	AB	AB	BB	AA	BB	AB	AB	AB	BB	AB	AB	AB	AB	AB	AB	AB	AB	AA	AB	AA	AA	BB	BB	BB	AB		BB	AB	AB	NC	BB	AB	AB	BB	AB	BB	BB
1067	AX-89787009	AB	BB	BB	BB	BB	AB	BB	BB	BB	BB	BB	BB	BB	AB	BB	AB	BB	BB	BB	BB	BB	BB	BB	BB	BB	AB	BB	BB	BB	BB	BB	AB	BB	BB	AB	BB		BB	BB	NC	BB	BB	BB	BB	BB	BB	BB	BB
1068	AX-89787027	AB	AA	AA	AA	AA	AA	AA	AA	AA	AA	AA	AA	AA	AB	AA	AB	AA	AA	AA	AA	AA	AA	AA	AA	AA	AB	AA	AA	AA	NC	AA	AB	AA	AB	AB	AA		AA	AA	NC	AA	AA	AA	AA	AA	AA	AA	AA
1069	AX-89827140	AB	BB	BB	BB	BB	AB	BB	AA	BB	BB	BB	BB	BB	BB	BB	BB	BB	BB	BB	BB	BB	BB	BB	BB	BB	AB	BB	BB	BB	NC	BB	AB	BB	BB	BB	BB		BB	BB	NC	BB	BB	BB	BB	BB	BB	BB	BB
1070	AX-89824659	BB	BB	NC	AB	AB	AB	AB	BB	AB	BB	AA	AB	AB	BB	AA	BB	AB	AB	NC	BB	AB	AB	AB	AB	NC	AB	AB	AB	AA	AB	AA	AB	AB	AB	AA	AB		BB	AB	AB	BB	BB	AB	AB	BB	AB	BB	BB
1071	AX-89787586	AA	AB	AB	AA	AA	AA	AA	AA	AB	AA	AB	AB	BB	AA	AB	AB	AB	AA	AB	AA	AB	AB	AA	BB	BB	AB	AB	AB	BB	AB	BB	BB	AB	AA	AA	AB		AA	AB	AB	AA	AA	AB	AA	AB	AB	AB	AB
1072	AX-89825812	AA	AB	AB	AB	AA	AA	AB	AA	BB	AA	AB	AB	BB	AA	AB	AA	BB	AB	AB	AB	AB	BB	AA	BB	BB	BB	BB	AB	BB	AB	BB	BB	AB	AA	AA	BB		AA	AB	AB	AA	AA	AB	AA	AB	AB	AB	AB
1073	AX-89883076	BB	AB	AB	BB	BB	BB	AB	AB	AA	BB	AB	AB	AA	BB	AB	BB	AA	AB	AB	AB	AB	AA	BB	AA	AA	AA	AA	AB	AA	AB	AA	AA	AB	AB	BB	AA		BB	AB	AB	BB	BB	AB	BB	AB	AA	AB	AB
1074	AX-89825902	AA	AB	AB	AA	BB	AA	AB	AA	AA	AA	AB	AB	AA	AA	AB	BB	AA	AB	AB	AB	AB	AA	BB	AA	AA	AA	AA	AB	AA	AB	AA	AA	AB	AA	AA	AA		BB	AB	AB	BB	BB	AB	BB	AB	AA	AB	AB
1075	AX-89785929	AA	BB	AB	AA	AB	AA	BB	AA	BB	AA	BB	BB	AB	AA	BB	AB	AB	NC	BB	BB	BB	AB	AB	BB	BB	NC	BB	BB	AB	AB	BB	AB	BB	AA	AA	BB		BB	AB	AB	BB	BB	BB	BB	AB	AB	BB	AB
1076	AX-89825732	AA	AB	AA	AB	AA	AA	AB	AA	AB	AA	AA	AB	AB	AA	AB	AB	AB	AA	AB	AB	AB	AB	AA	BB	BB	AB	BB	AB	AA	AB	AB	AB	AB	AA	AA	AB		AA	AB	AA	AA	AA	AA	AB	AB	AB	AA	AA
1077	AX-89825742	BB	AB	BB	AB	BB	BB	AB	BB	AB	BB	BB	AB	AB	BB	AB	AB	AB	NC	AB	AB	AB	AB	BB	NC	AA	AB	AA	AB	BB	AB	AB	AB	AB	BB	BB	AB		BB	AB	BB	BB	BB	AB	AB	AB	AB	BB	BB
1078	AX-89788027	AA	AB	AB	AB	AB	AA	AB	AB	AB	AA	AA	AB	BB	BB	AB	BB	BB	BB	AB	AB	AB	BB	AB	BB	BB	BB	BB	AB	AB	BB	AB	BB	BB	AA	AB	AB		AA	BB	AB	AA	AA	AA	AB	BB	BB	AA	AB
1079	AX-89828367	BB	AB	AB	BB	AB	BB	AB	AB	AB	AB	AB	AB	BB	AB	AB	BB	BB	BB	AB	AB	AB	BB	AB	BB	BB	BB	BB	AB	AB	BB	AB	BB	BB	BB	AB	AB		AA	BB	AB	AA	NC	AA	AB	BB	BB	NC	AB
1080	AX-89787981	BB	AB	BB	AB	BB	BB	AB	AB	AB	BB	BB	AB	AB	AA	AB	AB	AB	BB	AB	AB	AB	AB	BB	AA	AA	AB	AA	AB	BB	AB	AB	AB	AA	AA	AA	AB		BB	AB	BB	BB	BB	BB	AB	AB	AB	BB	BB
1081	AX-89872429	BB	AB	AB	AA	AB	BB	AB	AB	AB	AA	BB	AB	AA	AB	AB	AA	AA	AA	AB	AB	AB	AA	AB	AA	AA	AA	AA	AB	AB	AA	AB	AA	AA	AB	AA	AB		BB	AA	AB	BB	BB	BB	AB	AA	AA	BB	AB
1082	AX-89785832	AB	AB	AB	AB	BB	AB	AB	BB	AB	AA	AA	AB	BB	AB	AB	BB	BB	BB	AB	AB	AB	BB	AA	BB	BB	BB	BB	AB	AB	BB	AB	BB	BB	AB	AB	AB		NC	BB	AB	AB	AA	NC	AB	BB	BB	AA	AB
1083	AX-89861012	AB	AB	AB	AA	AB	NC	AB	BB	AB	AA	AA	AB	BB	BB	AB	BB	BB	BB	AB	AB	AB	BB	AA	AB	BB	BB	BB	AB	AB	BB	AB	BB	BB	AA	AB	AB		AA	BB	AB	AB	AA	AA	AB	BB	BB	AA	AB
1084	AX-89825710	BB	AB	AB	BB	BB	BB	AB	BB	AB	BB	AB	AB	BB	BB	AB	BB	BB	BB	AB	AB	AB	BB	AA	BB	BB	BB	BB	AB	AB	BB	AB	BB	BB	BB	BB	AB		AA	BB	AB	AB	AA	AA	AB	BB	BB	AA	AB
1085	AX-89785898	BB	AB	AB	NC	AB	AB	AB	AA	AB	AA	BB	AB	AA	NC	AB	AA	AA	AB	AB	AB	AB	AA	BB	AA	AA	AA	AA	AB	AB	AA	AB	AA	AA	AA	AA	AB		BB	AA	AB	AB	BB	BB	AB	AA	AA	BB	AB
1086	AX-89803886	AB	AB	AB	AB	BB	AB	AB	AB	AB	AB	BB	AB	AB	AB	AB	AB	AB	BB	AB	AB	AB	AA	BB	AB	AA	AB	AA	AB	BB	AB	AB	AB	AA	AA	AB	AB		BB	AA	BB	AB	BB	BB	AB	AA	AA	BB	AB
1087	AX-89784234	BB	AB	AA	AB	AA	BB	NC	AB	AB	AB	AA	AB	AB	BB	AB	AB	AB	AA	AB	AB	AB	BB	AA	AB	BB	AB	BB	AB	AA	AB	AB	AB	BB	BB	BB	AB		AA	AB	AA	AA	AA	AA	AB	AB	AB	AA	AA
1088	AX-89823820	AB	AB	AA	AB	AA	BB	AB	BB	AB	BB	AA	AB	AB	BB	AB	AB	AB	AA	AB	AB	AB	AB	AA	AB	BB	AB	BB	AB	AA	AB	AB	AB	BB	BB	BB	AB		AA	AB	AA	AA	AA	AA	AB	AB	AB	AA	AA
1089	AX-89824644	BB	BB	BB	BB	AB	BB	BB	BB	AB	BB	BB	AB	AB	BB	AA	AB	AB	AB	BB	BB	AB	BB	BB	AB	AB	AB	AB	AB	AB	AA	AB	AA	AB	BB	BB	AB		BB	AB	BB	BB	BB	BB	AB	AB	AB	AB	BB
1090	AX-89815389	BB	BB	BB	AB	BB	AB	BB	BB	AB	AB	BB	AB	BB	AB	BB	BB	BB	BB	BB	BB	BB	BB	BB	BB	BB	BB	BB	BB	BB	NC	BB	BB	BB	BB	AB	BB		BB	BB	BB	BB	BB	BB	BB	BB	AB	BB	BB
1091	AX-89882543	AA	AA	AA	AA	AA	AB	AA	AA	AA	AA	AA	AA	AB	AA	AA	AA	AB	AA	AA	AA	AA	AA	AA	AA	AA	AA	AA	AA	AB	NC	AA	AA	AA	AA	AA	AA		AA	AA	AA	AA	AA	AA	AA	AA	AA	AA	AA
1092	AX-89825407	BB	BB	BB	BB	AB	AB	AB	BB	BB	BB	BB	BB	AB	BB	BB	AB	AB	AB	BB	BB	BB	BB	BB	BB	BB	BB	BB	BB	AB	NC	BB	BB	BB	BB	BB	BB		BB	BB	BB	BB	BB	BB	BB	BB	BB	BB	BB
1093	AX-89882581	AA	BB	BB	AB	BB	AB	BB	AA	BB	AA	BB	BB	AB	AA	BB	BB	AB	BB	BB	BB	BB	BB	BB	BB	BB	BB	BB	BB	AB	NC	BB	BB	BB	AA	AB	BB		BB	BB	BB	BB	BB	BB	BB	BB	BB	BB	BB
1094	AX-89826495	BB	BB	BB	BB	BB	BB	AB	BB	BB	BB	BB	BB	BB	BB	BB	AB	AB	BB	BB	BB	AB	BB	BB	NC	BB	BB	BB	AB	AB	BB	BB	BB	BB	BB	BB	BB		BB	BB	BB	BB	BB	BB	BB	BB	BB	BB	BB
1095	AX-89785272	AB	AA	AA	BB	AA	BB	AA	BB	AA	BB	AA	AA	AB	NC	AA	AA	AA	AA	AA	AA	AB	AA	AA	AA	AA	AA	AA	AB	AB	AA	AA	AA	AA	BB	AB	AA		AA	AA	AA	AA	AA	AA	AA	AA	AA	AA	AA
1096	AX-89807205	BB	AA	AA	BB	AA	AB	AB	BB	AB	BB	AA	AA	AA	BB	AA	AB	AA	AA	AA	AA	AB	AA	AA	AA	AA	AA	AA	AB	AA	NC	AA	AA	AA	BB	BB	AA		AA	AA	AA	AA	AA	AA	AA	AA	AA	AA	AA
1097	AX-89786619	AB	AA	AA	BB	AB	AB	AB	BB	AB	BB	AA	AA	AB	BB	AA	AB	AB	AB	AA	AA	AB	AA	AA	AA	AA	AA	AA	AB	AB	AA	AA	AA	AA	AB	AB	AA		AA	AA	AA	AA	AA	AA	AA	AA	AA	AA	AA
1098	AX-89826690	AA	AA	AA	AA	AB	AA	AB	AA	AB	AA	AA	AA	AB	AA	AA	AB	AB	AB	AA	AA	AB	AA	AA	AA	AA	AA	AA	AB	AA	AA	AA	AA	AA	AB	AA	AA		AA	AA	AA	AA	AA	AA	AA	AA	AA	AA	AA
1099	AX-89786745	BB	BB	BB	BB	BB	AB	BB	BB	BB	BB	BB	BB	AB	AB	BB	BB	AB	BB	BB	BB	AB	BB	BB	BB	BB	BB	BB	AB	BB	NC	BB	BB	BB	AB	AA	BB		BB	BB	BB	BB	BB	BB	BB	BB	BB	BB	BB
1100	AX-89786903	AB	AB	AA	AA	AA	AB	BB	AA	AB	AA	AB	AB	AB	AB	AB	AB	AB	AB	BB	BB	BB	AB	AB	AB	AA	AB	AB	BB	AA	BB	AB	AB	AA	AA	AB	AB		AA	AA	AA	AA	AA	AA	AA	AA	AB	AA	AA
1101	AX-89826950	NC	AB	AA	NC	AA	BB	BB	BB	AB	BB	AB	AB	AB	NC	AB	AB	AB	AB	BB	BB	BB	AB	AB	AB	AA	AB	AB	BB	AA	BB	AB	AB	AA	BB	BB	AB		AA	AA	AA	AA	AA	AA	AA	AA	AB	AA	AA
1102	AX-89882097	BB	AA	AA	BB	AB	BB	AB	BB	AA	BB	AA	AA	AB	BB	AA	AB	AB	AB	AA	AA	AB	AA	AA	AA	AA	AA	AA	AB	AB	AA	AA	AA	AA	BB	AB	AA		AA	AA	AA	AA	AA	AA	AA	AA	AA	AA	AA
1103	AX-89824940	BB	BB	BB	BB	AB	BB	BB	AB	BB	BB	BB	BB	AB	NC	BB	BB	AB	AB	BB	BB	AB	BB	BB	BB	BB	BB	BB	AB	AB	BB	BB	BB	BB	BB	BB	BB		BB	BB	BB	BB	BB	BB	BB	BB	BB	BB	BB
1104	AX-89786549	AA	BB	BB	AB	AB	AB	AB	AB	AB	AB	BB	BB	BB	NC	BB	AB	AB	NC	BB	BB	AB	BB	BB	BB	BB	BB	BB	AB	AB	BB	BB	BB	BB	AB	AB	BB		BB	BB	BB	BB	BB	BB	BB	BB	BB	BB	BB
1105	AX-89785275	BB	AA	AA	BB	AB	BB	AB	BB	AA	BB	AA	AA	AB	NC	AA	AB	AB	AB	AA	AA	AB	AA	AA	AA	AA	AA	AA	AB	AB	AA	AA	AA	AA	BB	BB	AA		AA	AA	AA	AA	AA	AA	AA	AA	AA	AA	AA
1106	AX-89785227	AA	BB	BB	AB	AB	BB	BB	AA	BB	AA	BB	BB	AB	AB	BB	BB	AB	AB	BB	BB	AB	BB	BB	BB	BB	BB	BB	AB	AB	BB	BB	BB	BB	AA	AB	BB		BB	BB	BB	BB	BB	BB	BB	BB	BB	BB	BB
1107	AX-89824939	BB	BB	BB	BB	AB	BB	BB	BB	BB	BB	BB	BB	AB	NC	BB	BB	AB	AB	BB	BB	AB	BB	BB	BB	BB	BB	BB	AB	AB	BB	BB	BB	BB	BB	BB	BB		BB	BB	BB	BB	BB	BB	BB	BB	BB	BB	BB
1108	AX-89815431	AA	AB	AA	AA	AB	AA	BB	AA	AB	AA	AB	AB	AB	AA	AB	AB	AB	BB	BB	BB	BB	AB	AB	AB	AA	AA	AB	BB	AB	BB	AB	AB	AA	AA	AA	AB		AA	AA	AA	AA	AA	AA	AA	AA	AB	AA	AA
1109	AX-89787490	AA	BB	BB	AB	BB	AB	BB	AB	BB	AB	BB	BB	BB	NC	AB	AB	BB	BB	BB	BB	BB	BB	BB	BB	BB	AB	BB	BB	BB	BB	BB	AB	AB	AA	AB	BB		BB	BB	NC	BB	BB	BB	BB	BB	BB	BB	BB
1110	AX-89787960	AB	BB	BB	AB	BB	AB	BB	AB	BB	BB	BB	BB	BB	BB	AB	BB	BB	BB	BB	BB	BB	BB	BB	BB	BB	AB	BB	BB	BB	NC	BB	AB	AB	AB	AA	BB		BB	BB	NC	BB	BB	BB	BB	BB	BB	BB	BB
1111	AX-89787909	BB	AA	AA	AB	AA	AA	AA	AB	AA	BB	AA	AA	AA	AA	AB	AB	AA	AA	AA	AA	AA	AA	AA	AA	AA	AB	AA	AA	AA	AA	AA	NC	AB	BB	AB	AA		AA	AA	NC	AA	AA	AA	AA	AA	AA	AA	AA
1112	AX-89786896	AB	AB	BB	BB	BB	AB	AA	BB	AB	BB	AB	AB	AB	AB	AB	AB	BB	AB	AA	AA	AA	AB	AB	AB	BB	AB	AB	AA	BB	AA	AB	AB	BB	BB	AB	AB		BB	BB	BB	BB	BB	BB	BB	BB	AB	BB	BB
1113	AX-89905046	NC	AA	AB	AA	AB	AB	AB	AB	AB	AB	BB	AB	AB	AB	BB	AB	AB	AB	AB	AA	AB	AB	AA	AB	AB	AB	AB	AB	BB	AB	BB	BB	AA	AB	AA	AB		AA	AB	AB	AA	AA	AB	AB	AB	AB	AA	AB
1114	AX-89787762	AA	BB	AB	AA	AB	AA	AB	AB	AB	AA	AB	AB	AA	NC	AA	AB	AB	AB	AB	BB	AB	AB	BB	AB	AB	AB	AB	AB	AA	AB	AA	AA	AB	AA	AA	AB		BB	AB	AB	BB	BB	AB	BB	AB	AB	BB	AB
1115	AX-89807224	AA	AB	BB	NC	BB	AA	AA	AA	AA	AA	AB	AB	AA	AA	AB	AB	AB	AB	AA	AA	AA	AB	AB	AB	BB	AB	AB	AA	BB	AA	AB	AB	BB	AB	BB	AB		BB	BB	BB	BB	BB	BB	BB	BB	AB	BB	BB
1116	AX-89826911	AB	AB	BB	AA	BB	AB	AA	AA	AA	AA	AB	AB	BB	BB	AB	AB	BB	AB	AA	AA	AA	AB	BB	AB	BB	AB	AB	AA	BB	NC	AB	AB	BB	AB	AA	AB		BB	BB	BB	BB	BB	BB	BB	BB	AB	BB	BB
1117	AX-89787741	BB	BB	AB	BB	BB	AB	AB	BB	AB	BB	AB	AB	AA	BB	AB	BB	AB	BB	AB	BB	AB	AB	BB	AB	AB	AB	AB	AB	AA	AB	AA	AA	BB	BB	BB	AB		BB	AB	AB	BB	BB	AB	BB	AB	AB	BB	AB
1118	AX-89827908	BB	AB	AB	AB	BB	BB	BB	AB	AB	AB	AB	AB	AA	AB	AB	BB	AB	BB	AB	BB	AB	AB	BB	AA	AA	AB	AB	AB	AA	AB	AA	AA	AB	AB	AB	AB		BB	AB	AB	BB	BB	AB	BB	AB	AB	BB	AB
1119	AX-89827905	BB	AB	AB	BB	AB	BB	BB	BB	AB	BB	AB	AB	AA	NC	AA	AB	AB	AB	AB	BB	AB	AB	BB	AA	AA	AB	AB	AB	AA	AB	AA	AA	AA	BB	BB	AB		BB	AB	AB	BB	BB	AB	BB	AB	AB	AB	AB
1120	AX-89787549	AA	AB	AB	AA	AA	AA	AA	AB	AB	AA	AB	AB	BB	AB	AB	AA	AB	AA	AB	AA	AB	AB	AA	BB	BB	AB	AB	AB	BB	AB	BB	BB	AB	AA	AA	AB		AA	AB	AB	AA	AA	AB	AA	AB	AB	AB	AB
1121	AX-89848036	AB	AA	AA	BB	BB	AB	AB	BB	AB	AB	AB	AB	AB	NC	AB	BB	AB	AB	AA	AA	AB	AA	AB	AB	AB	AB	AB	AB	BB	AA	AB	AB	BB	BB	BB	AB		AB	AB	AB	AB	AB	AB	AB	AB	AA	AB	AB
1122	AX-89785313	AA	BB	BB	AA	BB	AA	BB	AA	BB	AA	BB	BB	AB	AB	BB	BB	AB	BB	BB	BB	AB	BB	BB	BB	BB	BB	BB	AB	AB	NC	BB	BB	BB	AA	AA	BB		BB	BB	BB	BB	BB	BB	BB	BB	BB	BB	BB
1123	AX-89807043	AB	AA	AA	AB	AA	AB	AA	AB	AA	BB	AA	AA	AB	AB	AA	AA	AB	AA	AA	AA	AB	AA	AA	AA	AA	AA	AA	AB	AB	NC	AA	AA	AA	BB	BB	AA		AA	AA	AA	AA	AA	AA	AA	AA	AA	AA	AA
1124	AX-89785599	AA	NC	BB	AA	BB	AA	NC	AA	BB	AB	BB	BB	NC	AA	BB	BB	BB	BB	BB	BB	BB	BB	BB	BB	BB	BB	BB	BB	BB	NC	BB	BB	BB	AA	AA	BB		BB	BB	BB	BB	BB	BB	BB	BB	BB	BB	BB
1125	AX-89785510	BB	AA	AA	AB	BB	AB	AA	AB	AB	BB	AB	BB	NC	AB	BB	AB	AB	AB	AA	AA	BB	AA	AB	AB	AB	AB	AB	BB	BB	AB	AB	BB	BB	BB	AB	AB		AB	AB	AB	AB	AB	AB	AB	AB	AB	AB	AB
1126	AX-89825505	BB	AA	AA	BB	AA	AB	AA	BB	AB	BB	AB	BB	BB	BB	BB	AB	AA	AA	AA	AA	BB	AA	AB	AB	AB	AB	AB	BB	AB	AB	AB	BB	AB	BB	AA	AB		AB	AB	AB	AB	AB	AB	AB	AB	AB	AB	AB
1127	AX-89785735	AB	BB	BB	AA	AA	AA	BB	AB	AB	AA	AB	AA	AB	AA	AA	AB	AB	AB	BB	BB	AA	BB	AB	AB	AB	AB	AB	AA	AA	AB	AB	AA	AB	AB	AA	AB		AB	AB	AB	AB	AB	AB	AB	AB	AB	AB	AB
1128	AX-89826076	AB	BB	BB	AA	AA	AA	BB	BB	BB	AB	AB	AB	AB	BB	AA	AB	AB	AB	BB	BB	AA	BB	AB	AB	AB	AB	AB	AA	AA	AB	AB	AA	AB	AA	AB	AB		AB	AB	AB	AB	AB	AB	AB	AB	BB	AB	AB
1129	AX-89824791	AB	AA	AA	AA	BB	AB	AA	AB	AB	BB	AB	BB	AB	NC	BB	AB	AB	AB	AA	AA	BB	AA	AB	AB	AB	AB	AB	BB	AB	BB	AB	BB	AB	BB	BB	AB		AB	AB	AB	AB	AB	AB	AB	AB	AB	AB	AB
1130	AX-89827047	BB	BB	BB	BB	AB	BB	AB	AB	BB	AB	AB	AB	BB	BB	BB	BB	BB	AB	AB	AB	BB	BB	AB	AB	BB	BB	BB	AB	BB	BB	BB	BB	BB	BB	BB	BB		AB	BB	NC	AB	AB	AB	BB	BB	BB	BB	AB
1131	AX-89807106	NC	AA	AB	BB	AB	BB	AA	BB	AA	BB	AA	AA	AB	BB	AA	AB	AB	AB	AA	AA	AA	AB	AA	AA	AA	AB	AA	AA	AB	AB	AA	AB	AA	BB	BB	AA		AA	AB	AB	AB	AA	AA	AA	AB	AB	AA	AB
1132	AX-89848276	AB	BB	AB	AB	AB	AB	BB	AA	BB	AB	BB	BB	AB	AB	BB	AB	AB	AA	BB	BB	BB	AB	AB	BB	BB	AB	BB	BB	AB	AB	BB	AB	BB	AB	NC	BB		BB	AB	AB	BB	BB	BB	BB	AB	AB	BB	AB
1133	AX-89785840	BB	AB	BB	AB	BB	AB	AB	AB	AB	BB	BB	AB	AB	AB	AB	AB	AB	BB	AB	AB	AB	AB	BB	AA	AA	AB	AA	AB	BB	AB	AB	AB	AA	BB	AB	AB		BB	AB	BB	BB	BB	BB	AB	AB	AB	BB	BB
1134	AX-89784343	AB	BB	BB	BB	AB	AB	BB	BB	AB	AB	BB	BB	AB	BB	BB	BB	BB	BB	BB	BB	BB	BB	BB	BB	BB	BB	BB	BB	BB	NC	BB	BB	BB	BB	BB	BB		BB	BB	BB	BB	BB	BB	BB	BB	BB	BB	BB
1135	AX-89823931	AB	AB	AB	AB	BB	AA	BB	AA	BB	AB	BB	BB	AB	AA	BB	BB	BB	BB	BB	BB	BB	AB	BB	AB	AB	BB	BB	BB	BB	NC	BB	BB	AB	AA	AA	BB		BB	AB	BB	AB	BB	BB	AB	AB	AB	BB	AB
1136	AX-89784339	AA	AB	AB	AA	BB	AA	BB	AB	BB	AA	BB	BB	AB	AB	BB	BB	BB	BB	BB	BB	BB	AB	BB	AB	AB	BB	BB	BB	BB	NC	BB	BB	AB	AA	AA	BB		BB	AB	BB	AB	BB	BB	BB	AB	AB	BB	AB
1137	AX-89784593	AB	AB	AB	BB	AB	BB	AB	AB	AB	BB	BB	BB	BB	NC	AB	AB	AB	AB	AB	AB	AB	AB	BB	BB	AB	AB	AA	AB	AB	AB	AB	AB	AB	BB	BB	AB		AB	AB	BB	BB	AB	AB	AB	AB	BB	AB	BB
1138	AX-89824337	AA	AB	AB	AB	AA	AA	AB	AA	AB	AB	AB	AA	AA	AA	AB	BB	BB	AB	AB	AB	BB	AB	AA	AA	AB	AB	BB	AB	BB	AB	BB	AB	AB	AA	AA	BB		AB	AB	AB	AA	AB	AB	AB	AB	AA	NC	AA
1139	AX-89807238	AA	AA	AA	AA	AB	AA	AB	AB	AA	AA	AB	AB	AA	AB	AA	AA	AA	AA	AB	AB	AA	AA	AB	AB	AA	AA	AA	AB	AA	AA	AA	AA	AA	AA	AA	AA		AB	AA	AB	AB	AB	AB	AA	AA	AA	AA	AB
1140	AX-89881277	BB	BB	BB	BB	AA	BB	AA	AB	BB	BB	NC	AB	BB	AB	BB	BB	BB	BB	AB	AB	BB	BB	AB	AB	BB	BB	BB	AB	BB	BB	BB	BB	BB	BB	BB	BB		AB	BB	AB	AB	AB	AB	BB	BB	BB	BB	AB
1141	AX-89861066	BB	AB	AB	BB	AB	BB	AB	AB	AB	BB	AB	BB	BB	BB	AA	AA	AB	AB	AB	AB	AA	AB	BB	BB	AB	AA	AA	AB	AA	AB	AA	AA	AB	BB	BB	AA		AB	NC	AB	BB	AB	AB	AB	AB	BB	NC	BB
1142	AX-89785024	BB	AB	AB	BB	AB	BB	AB	BB	AB	BB	AB	BB	BB	BB	AA	AA	AB	AB	AB	AB	AA	AB	BB	NC	AB	AA	AA	AB	AA	AB	AA	AA	AB	BB	BB	AA		AB	NC	AB	BB	AB	AB	AB	AB	BB	NC	BB
1143	AX-89827078	AA	BB	BB	AA	AB	AB	AB	AA	BB	AA	NC	AB	BB	AA	BB	BB	BB	AB	AB	AB	BB	BB	AB	AB	BB	BB	BB	AB	BB	BB	BB	BB	BB	AA	AA	BB		AB	BB	AB	AB	AB	AB	BB	BB	BB	BB	AB
1144	AX-89905067	AA	AB	AB	BB	AB	BB	AB	BB	AA	BB	AB	AB	BB	AA	AA	AA	AB	AB	AB	AB	AA	AB	AB	AA	AB	AA	AA	AB	AA	AB	AA	AA	AB	AA	AA	AA		AB	AA	AB	BB	AB	AB	AB	AB	AB	AA	BB
1145	AX-89827099	BB	BB	BB	AB	AB	BB	AB	AB	AB	AA	AB	AA	AB	NC	BB	BB	BB	AB	AB	AB	BB	BB	AA	AB	BB	BB	BB	AB	BB	BB	BB	BB	BB	BB	AB	BB		AB	NC	AB	AB	AB	AB	NC	NC	AB	NC	AB
1146	AX-89827084	AB	BB	BB	AB	AB	AA	AB	AB	BB	AB	AB	AB	BB	AB	BB	BB	BB	AB	AB	AB	BB	BB	AB	AB	BB	BB	BB	AB	BB	NC	BB	BB	BB	AB	AA	BB		AB	BB	AB	AB	AB	AB	BB	BB	BB	BB	AB
1147	AX-89827072	AA	AB	AB	AB	AB	AA	AB	BB	AB	BB	AB	BB	AB	NC	AA	AA	AB	AB	AB	AB	AA	AB	BB	BB	AB	AA	AA	AB	AA	AB	AA	AA	AB	AB	AB	AA		AB	NC	AB	BB	AB	AB	AB	AB	BB	NC	BB
1148	AX-89824514	BB	BB	BB	BB	AB	BB	AB	AB	AB	BB	AB	AA	BB	BB	BB	BB	BB	AB	AB	AB	BB	BB	AA	NC	BB	BB	BB	AB	BB	NC	BB	BB	BB	BB	BB	BB		AB	NC	AB	AB	AB	AB	NC	NC	AB	NC	AB
1149	AX-89786135	BB	AA	AA	BB	AA	BB	AA	BB	AB	AB	AA	AB	AA	AB	AA	AA	AA	AA	AA	AA	AA	AA	AA	AA	AA	AA	AA	AA	AA	NC	AA	AA	AA	BB	BB	AA		AA	AA	AA	AA	AA	AA	AA	AA	AB	AA	AA
1150	AX-89788017	AA	AA	AA	AA	AA	AB	AA	BB	AB	AB	AA	AB	AA	AA	AA	AA	AA	AA	AA	AA	AA	AA	AB	AA	AA	AA	AA	AA	AA	NC	AA	AA	AA	BB	AB	AA		AA	AA	AA	AA	AA	AA	AA	AA	AB	AA	AA
1151	AX-89872445	BB	AA	AA	BB	AA	BB	AA	BB	AB	BB	AA	AB	AA	BB	AA	AA	AA	AA	AA	AA	AA	AA	AA	AA	AA	AA	AA	AA	AA	NC	AA	AA	AA	BB	BB	AA		AA	AA	AA	AA	AA	AA	AA	AA	AB	AA	AA
1152	AX-89872446	BB	AA	AA	BB	AA	AB	AA	AA	AB	AB	AA	AB	AA	BB	AA	AA	AB	AA	AA	AA	AA	AA	AA	AA	AA	AA	AA	AA	AA	NC	AA	AA	AA	AA	AB	AA		AA	AA	AA	AA	AA	AA	AA	AA	NC	AA	AA
1153	AX-89784881	BB	BB	BB	BB	AA	AB	BB	AB	AB	AB	BB	AA	AB	AA	AA	AB	AB	AB	BB	BB	AA	BB	BB	AB	AB	AB	AB	AB	AB	AA	AB	AA	AB	BB	BB	AB		AB	AB	AB	AB	AB	AB	AB	AB	AB	AB	AB
1154	AX-89803981	BB	AA	AA	BB	BB	AB	AA	BB	AA	BB	AB	AB	AB	BB	BB	AA	AB	AA	AA	AA	BB	AA	AA	AA	AA	AA	AA	AB	AB	AB	AB	AB	AB	BB	BB	AA		AB	AB	AB	AB	AB	AB	AB	AB	AB	AB	AB
1155	AX-89883391	AB	AA	AA	AB	AB	AA	AA	AB	AA	AB	AB	AB	AA	AB	AB	AB	AA	AB	AA	AA	AB	AA	AB	AB	AB	AB	AB	AB	AB	AB	AB	AB	AB	AB	AB	AB		AB	AB	AB	AB	AB	AB	AB	AB	AA	AB	AB
1156	AX-89883394	AB	AA	AA	AA	AA	AB	AA	BB	AA	AA	AA	AA	NC	AA	AA	AA	AA	AA	AA	AA	AA	AA	AA	AA	AA	AA	AA	AA	AA	NC	AA	AA	AA	AA	AA	AA		AA	AA	AA	AA	AA	AA	AA	AA	AA	AA	AA
1157	AX-89786338	AA	AA	AA	AB	AA	AB	AA	AA	AA	AA	AA	AA	AA	AA	AA	AA	AA	AA	AA	AA	AA	AA	AA	AA	AA	AA	AA	AA	AA	NC	AA	AA	AA	AA	AB	AA		AA	AA	AA	AA	AA	AA	AA	AA	AA	AA	AA
1158	AX-89863314	BB	AA	AA	BB	AA	AB	AA	AB	AA	BB	AB	AB	AA	AA	BB	AB	AA	AB	AA	AA	BB	AA	AB	AB	AB	AB	AB	BB	AB	AB	AB	BB	AB	AB	BB	AB		AB	AB	AB	AB	AB	AB	AB	AB	AA	AB	AB
1159	AX-89883342	BB	AA	AA	AB	AB	BB	AA	BB	AB	BB	AB	BB	BB	BB	BB	AB	AA	BB	AA	AA	BB	AA	AB	AB	AB	AB	AB	BB	AB	BB	AB	BB	AB	AB	BB	AB		AB	AB	AB	AB	AB	AB	AB	AB	AB	AB	AB
1160	AX-89826212	AB	BB	BB	BB	AB	BB	BB	AB	AB	AB	AB	AA	AA	AA	AA	AB	BB	AA	BB	BB	AA	BB	AB	AB	AB	AB	AB	AA	AB	AA	AB	AA	AB	BB	AB	AB		AB	AB	AB	AB	AB	AB	AB	AB	AB	AB	AB
1161	AX-89786324	AB	BB	BB	AB	BB	AA	BB	BB	BB	BB	BB	BB	NC	AB	BB	BB	BB	BB	BB	BB	BB	BB	BB	BB	BB	BB	BB	BB	BB	NC	BB	BB	BB	BB	AB	BB		BB	BB	BB	BB	BB	BB	BB	BB	BB	BB	BB
1162	AX-89905236	AA	AB	AA	AB	AB	AB	AB	AB	BB	AB	AA	AA	AA	AA	AA	AA	AA	AB	AB	AB	AA	AB	AA	AB	AB	AA	AA	AA	AA	BB	AA	AA	AA	AA	AA	AA		AA	AA	AA	AA	AA	AA	AA	AA	AA	AA	AA
1163	AX-89788355	BB	BB	BB	BB	BB	BB	BB	BB	BB	BB	BB	BB	BB	BB	BB	BB	BB	BB	BB	BB	BB	BB	BB	BB	BB	BB	BB	BB	BB	BB	BB	BB	BB	BB	BB	BB		BB	BB	BB	BB	BB	BB	BB	BB	BB	BB	BB
1164	AX-89788818	AA	AB	BB	AB	AB	AA	AB	AB	AB	AB	BB	BB	BB	NC	BB	BB	BB	AB	AB	AB	BB	AB	BB	AB	AB	BB	BB	BB	BB	AB	BB	BB	BB	AB	AA	BB		BB	BB	BB	BB	BB	BB	BB	BB	BB	BB	BB
1165	AX-89788388	BB	BB	BB	BB	BB	BB	BB	BB	BB	BB	BB	BB	BB	BB	BB	BB	BB	BB	BB	BB	BB	BB	BB	BB	BB	BB	BB	BB	BB	BB	BB	BB	BB	AB	BB	BB		BB	BB	BB	BB	BB	BB	BB	BB	BB	BB	BB
1166	AX-89804654	BB	AB	AA	BB	AB	BB	AB	BB	BB	BB	AA	AA	AA	BB	AA	AA	AA	AB	AB	AB	AA	AB	AA	AB	AB	AA	AA	AA	AA	BB	AA	AA	AA	BB	BB	AA		AA	AA	AA	AA	AA	AA	AA	AA	AA	AA	AA
1167	AX-89789438	AA	AB	BB	AA	AB	AA	NC	AB	AA	AA	BB	BB	BB	AA	BB	BB	BB	NC	AB	AB	BB	AB	BB	AB	AB	BB	BB	BB	BB	AA	BB	BB	BB	AB	AA	BB		BB	BB	BB	BB	BB	BB	BB	BB	BB	BB	BB
1168	AX-89789494	BB	AB	BB	BB	AB	BB	AB	BB	AA	BB	BB	BB	BB	BB	BB	BB	BB	AB	AB	AB	BB	AB	BB	NC	AB	BB	BB	BB	BB	AA	BB	BB	BB	BB	BB	BB		BB	BB	BB	BB	BB	BB	BB	BB	BB	BB	BB
1169	AX-89789052	AA	NC	AA	AA	AB	AA	AB	AA	BB	AA	AA	AA	AA	AA	AA	AA	AA	AB	AB	AB	AA	AB	AA	AB	AB	AA	AA	AA	AA	BB	AA	AA	AA	AA	AA	AA		AA	AA	AA	AA	AA	AA	AA	AA	AA	AA	AA
1170	AX-89828572	AA	AB	BB	AB	AB	AB	AB	AB	AB	AB	BB	BB	BB	AB	BB	BB	BB	AB	AB	AB	BB	AB	BB	AB	AB	BB	BB	BB	BB	AB	BB	BB	BB	AA	AB	BB		BB	BB	BB	BB	BB	BB	BB	BB	BB	BB	BB
1171	AX-89905083	AA	AB	AA	AA	AB	AB	AB	AA	BB	AB	AA	AA	AA	AA	AA	AA	AA	AB	AB	AB	AA	AB	AA	AB	AB	AA	AA	AA	AA	BB	AA	AA	AA	AA	AA	AA		AA	AA	AA	AA	AA	AA	AA	AA	AA	AA	AA
1172	AX-89788211	BB	AB	AA	AB	AB	AB	AB	AB	BB	AB	AA	AA	AA	NC	AA	AA	AA	AB	AB	AB	AA	AB	AA	AB	AB	AA	AA	AA	AA	BB	AA	AA	AA	BB	AB	AA		AA	AA	AA	AA	AA	AA	AA	AA	AA	AA	AA
1173	AX-89788193	AA	AB	BB	AB	AB	AB	AB	AB	AB	AB	BB	BB	BB	NC	BB	BB	BB	AB	AB	AB	BB	AB	BB	AB	AB	BB	BB	BB	BB	AB	BB	BB	BB	AA	AB	BB		BB	BB	BB	BB	BB	BB	BB	BB	BB	BB	BB
1174	AX-89789303	AA	AB	AA	BB	AB	AA	AB	BB	BB	BB	AA	AA	AA	BB	AA	AA	AA	AB	AB	AB	AA	AB	AA	AB	AB	AA	AA	AA	AA	BB	AA	AA	AA	BB	BB	AA		AA	AA	AA	AA	AA	AA	AA	AA	AA	AA	AA
1175	AX-89832030	AB	AB	BB	AA	AB	AA	AB	AB	AA	AA	BB	BB	BB	AB	BB	BB	BB	AB	AB	AB	BB	AB	BB	AB	AB	BB	BB	BB	BB	AA	BB	BB	BB	AA	AA	BB		BB	BB	BB	BB	BB	BB	BB	BB	BB	BB	BB
1176	AX-89791072	BB	AB	AA	BB	AB	BB	NC	BB	BB	BB	AA	AA	AA	NC	AA	AA	AA	NC	AB	NC	AA	NC	AA	NC	AB	AA	AA	AA	NC	BB	AA	AA	AA	BB	BB	AA		AA	AA	AA	AA	AA	AA	AA	AA	AA	AA	AA
1177	AX-89831436	BB	AB	AA	AB	AB	BB	AB	AB	BB	AB	AA	AA	AA	AA	AA	AA	AA	AB	AB	AB	AA	AB	AA	AB	AB	AA	AA	AA	AA	BB	AA	AA	AA	AB	AB	AA		AA	AA	AA	AA	AA	AA	AA	AA	AA	AA	AA
1178	AX-89807632	AA	AB	BB	AA	AB	AA	AB	AB	AA	AA	BB	BB	BB	AB	BB	BB	BB	AB	AB	AB	BB	BB	BB	BB	AB	BB	BB	BB	BB	AA	BB	AB	BB	AA	AA	BB		BB	BB	BB	BB	BB	BB	BB	BB	BB	BB	BB
1179	AX-89831601	AA	AB	AA	AB	AB	AA	AB	AB	BB	BB	AA	AA	AA	BB	AA	AA	AA	AB	AB	AB	AA	AB	AA	AB	AB	AA	AA	AA	AA	BB	AA	AA	AA	AB	AB	AA		AA	AA	AA	AA	AA	AA	AA	AA	AA	AA	AA
1180	AX-89791000	AA	AB	BB	AA	AB	AB	AB	AA	AB	AB	BB	BB	BB	AA	BB	BB	BB	AB	AB	AB	BB	AB	BB	AB	AB	BB	BB	BB	BB	NC	BB	BB	BB	AB	BB	BB		BB	BB	BB	BB	BB	BB	BB	BB	BB	BB	BB
1181	AX-89831454	BB	AB	BB	AB	AB	BB	NC	AB	AB	AA	BB	BB	NC	AA	BB	BB	AA	BB	BB	BB	BB	AB	BB	BB	BB	BB	BB	BB	BB	AB	AA	BB	BB	AB	AB	BB		BB	BB	BB	BB	BB	BB	BB	BB	BB	BB	BB
1182	AX-89788201	AA	AA	AA	AB	AA	AB	AA	BB	AA	AA	AA	AA	AA	AA	AA	AA	AA	AA	AA	AA	AB	AA	AA	AA	AA	AA	AA	AA	AA	NC	AA	AA	AA	BB	AB	AA		AA	AA	AA	AA	AA	AA	AA	AA	AA	AA	AA
1183	AX-89791547	AA	AA	AA	AA	AA	AB	AB	BB	AA	BB	AB	AA	AB	AB	AB	AB	AB	AA	AA	AA	AB	AA	AA	NC	AA	AA	AA	AA	AA	AA	BB	NC	AA	AB	AA	AB		AA	AA	AA	AA	AA	AA	NC	NC	AA	AA	AA
1184	AX-89830516	AB	AB	BB	BB	AB	AB	AB	AB	AA	AB	BB	BB	BB	AA	BB	BB	BB	AB	AB	AB	BB	AB	BB	AB	AB	BB	BB	BB	BB	AA	BB	BB	BB	AB	AA	BB		BB	BB	BB	BB	BB	BB	BB	BB	BB	BB	BB
1185	AX-89830849	AB	AB	BB	BB	AB	AA	NC	AB	AA	AB	BB	BB	BB	AA	BB	BB	BB	BB	AB	AB	BB	AB	BB	BB	AB	BB	BB	BB	BB	AA	BB	BB	BB	AB	AB	BB		BB	BB	BB	BB	BB	BB	BB	BB	BB	BB	BB
1186	AX-89830665	AB	AB	AA	AB	AB	BB	AB	AB	AB	AB	AA	AA	AA	BB	AA	AA	AA	AB	AB	AB	AA	AB	AA	AB	AB	AA	AA	AA	AA	AB	AA	AA	AA	BB	BB	AA		AA	AA	AA	AA	AA	AA	AA	AA	AA	AA	AA
1187	AX-89872570	AA	AB	AA	AB	AB	AB	AB	AA	BB	AB	AA	AA	AA	AA	AA	AA	AA	AB	AB	AB	AA	AB	AA	AB	AB	AA	AA	AA	AA	BB	AA	AA	AA	BB	AB	AA		AA	AA	AA	AA	AA	AA	AA	AA	AA	AA	AA
1188	AX-89790345	BB	AB	BB	AB	AB	AB	AB	BB	AA	BB	BB	BB	BB	NC	BB	BB	BB	AB	AB	AB	BB	AB	BB	AB	AB	BB	BB	BB	BB	AA	BB	BB	BB	AB	BB	BB		BB	BB	BB	BB	BB	BB	BB	BB	BB	BB	BB
1189	AX-89790285	AA	AB	AA	AA	AB	AA	AB	AA	BB	AA	AA	AA	AA	AB	AA	AA	AA	AB	AB	AB	AA	AB	AA	AB	AB	AA	AA	AA	AA	BB	AA	AA	AA	AA	AA	AA		AA	AA	AA	AA	AA	AA	AA	AA	AA	AA	AA
1190	AX-89830847	AB	AB	AA	BB	AB	AA	AB	AB	BB	BB	AA	AA	AA	AB	AA	AA	AA	AB	NC	AB	AA	AB	AA	AB	AB	AA	AA	AA	AA	BB	AA	AA	AA	AB	AB	AA		AA	AA	AA	AA	AA	AA	AA	AA	AA	AA	AA
1191	AX-89905085	AB	BB	BB	AA	BB	AB	BB	AA	BB	NC	BB	BB	BB	AB	BB	BB	BB	BB	BB	BB	AB	BB	BB	BB	BB	BB	BB	BB	BB	NC	BB	BB	BB	BB	AB	BB		BB	BB	BB	BB	BB	BB	BB	BB	BB	BB	BB
1192	AX-89790878	BB	AA	BB	AB	AA	BB	AA	BB	AB	BB	BB	BB	AB	AB	BB	AB	AA	AB	AB	AB	BB	AA	BB	AB	AB	BB	BB	BB	BB	AB	BB	BB	BB	BB	BB	BB		BB	BB	BB	BB	BB	BB	BB	BB	BB	BB	BB
1193	AX-89790872	AB	AB	BB	BB	AB	AB	AB	AB	AB	AB	BB	BB	AB	AB	BB	AB	AB	AB	AB	AB	BB	AB	BB	AB	AB	BB	BB	BB	BB	NC	BB	BB	BB	AB	AB	BB		BB	BB	BB	BB	BB	BB	BB	BB	BB	BB	BB
1194	AX-89790968	BB	AA	AA	AA	AA	AB	AA	BB	AA	AB	AA	AA	BB	BB	AA	AA	AA	AA	AA	AA	AA	AA	AA	AA	AA	AA	AA	AA	AA	NC	AA	AA	AA	AB	AB	AA		AA	AA	AA	AA	AA	AA	AA	AA	AA	AA	AA
1195	AX-89790960	AB	BB	BB	BB	BB	AB	BB	BB	AB	AB	BB	BB	AB	AB	BB	AB	AB	BB	BB	BB	AB	BB	BB	BB	BB	BB	BB	BB	BB	NC	BB	BB	BB	AB	AA	BB		BB	BB	BB	BB	BB	BB	BB	BB	BB	BB	BB
1196	AX-89790905	AA	AB	AA	AB	AB	AB	AB	AB	BB	AB	AA	AA	AB	AA	AA	AB	AB	AB	AB	AB	AA	AB	AA	AB	AB	AA	AA	AA	AA	BB	AA	AA	AA	AA	AB	AA		AA	AA	AA	AA	AA	AA	AA	AA	AA	AA	AA
1197	AX-89790930	AA	AB	BB	AB	AB	AB	AB	BB	AB	BB	BB	BB	NC	AA	BB	BB	BB	AB	AB	AB	BB	AB	BB	AB	AB	BB	BB	BB	BB	AB	BB	NC	BB	AA	AB	BB		BB	BB	BB	BB	BB	BB	BB	BB	BB	BB	BB
1198	AX-89831513	BB	AB	AB	AB	AB	BB	NC	AB	BB	AA	AB	AB	AB	AA	AA	BB	AB	AB	AB	AB	AB	AB	AA	BB	BB	AA	AB	AA	AB	BB	AA	AB	AA	AB	AB	AA		AB	BB	AB	AB	AB	BB	AA	AA	AB	BB	AB
1199	AX-89888652	AA	AB	BB	AA	AB	AB	AB	AA	AB	AA	BB	BB	AB	AB	BB	AB	AB	AB	AB	AB	BB	AB	BB	AB	AB	BB	BB	BB	BB	AB	BB	BB	BB	AA	AB	BB		BB	BB	BB	BB	BB	BB	BB	BB	BB	BB	BB
1200	AX-89888665	AA	AB	BB	AB	AB	AA	AB	AA	AB	AB	BB	BB	AB	AA	BB	AB	AB	AB	AB	AB	BB	AB	BB	NC	AB	BB	BB	BB	BB	NC	BB	BB	BB	AB	AB	BB		BB	BB	BB	BB	BB	BB	BB	BB	BB	BB	BB
1201	AX-89848480	AA	AA	AA	AB	AA	AB	AA	AB	AA	AB	AA	AA	AA	AA	AA	AA	AA	AB	AA	AA	AA	AA	AA	AA	AA	AA	AA	AA	AA	NC	AA	AB	AA	AA	AA	AA		AA	AA	AA	AA	AA	AA	AA	AA	AA	AA	AA
1202	AX-89872562	BB	AA	AA	AB	AA	AB	AA	AA	AA	BB	AA	AA	AA	BB	AA	AA	AA	AB	AA	AA	AA	AA	AA	AA	AA	AA	AA	AA	AA	NC	AA	AB	AA	AA	AB	AA		AA	AA	AA	AA	AA	AA	AA	AA	AA	AA	AA
1203	AX-89830179	BB	AA	AA	BB	AA	AB	AA	BB	AA	AB	AA	AA	AA	BB	AA	NC	AA	AB	AA	AA	AA	AA	AA	AA	AA	AA	AA	AA	AA	NC	AA	NC	AA	AB	BB	AA		AA	AA	AA	AA	AA	AA	AA	AA	AA	AA	AA
1204	AX-89830616	AB	BB	BB	BB	BB	BB	BB	AB	BB	BB	BB	BB	BB	BB	BB	BB	BB	BB	BB	BB	BB	BB	BB	BB	BB	BB	BB	BB	BB	NC	BB	BB	BB	AB	AB	BB		BB	BB	BB	BB	BB	BB	BB	BB	BB	BB	BB
1205	AX-89788447	BB	BB	BB	BB	BB	BB	BB	AB	BB	BB	BB	BB	BB	BB	BB	BB	BB	BB	BB	BB	BB	BB	BB	BB	BB	BB	BB	BB	BB	NC	BB	BB	BB	BB	BB	BB		BB	BB	BB	BB	BB	BB	BB	BB	BB	BB	BB
1206	AX-89888020	BB	AA	AA	BB	AA	BB	AA	AA	AA	BB	AA	AA	AA	BB	AA	AA	AA	AA	AA	AA	AA	AA	AA	AA	AA	AA	AA	AA	AA	NC	AA	AA	AA	BB	AB	AA		AA	AA	AA	AA	AA	AA	AA	AA	AA	AA	AA
1207	AX-89830794	AB	AA	AA	AB	AB	BB	AA	BB	AB	AB	AA	AA	AA	BB	AA	AA	AB	AB	AA	AA	AA	AA	AA	AA	AA	AA	AA	AA	AA	NC	AA	AA	AA	BB	BB	AA		AA	AA	AA	AA	AA	AA	AA	AA	AA	AA	AA
1208	AX-89790331	AB	AA	AA	BB	AA	AB	AA	BB	AA	BB	AA	AA	AA	AB	AA	AA	AA	AA	AA	AA	AA	AA	AA	AA	AA	AA	AA	AA	AA	NC	AA	AA	AA	BB	AB	AA		AA	AA	AA	AA	AA	AA	AA	AA	AA	AA	AA
1209	AX-89790316	BB	AA	AB	BB	AA	AB	AA	BB	AA	BB	AA	AA	AA	BB	AA	AB	AA	AA	AA	AA	AA	AA	AA	AA	AA	AA	AA	AA	AB	NC	AA	AA	AA	BB	BB	AA		AA	AB	AA	AA	AA	AA	AA	AB	AB	AA	AB
1210	AX-89790304	AA	AA	AA	AA	AA	AA	AA	AB	AA	AA	AA	AA	AA	AA	AA	AA	AA	AA	AA	AA	AA	AA	AA	AA	AA	AA	AA	AA	AA	NC	AA	AA	AA	AA	AA	AA		AA	AA	AA	AA	AA	AA	AA	AA	AA	AA	AA
1211	AX-89888108	BB	BB	AB	BB	BB	BB	BB	AB	BB	BB	BB	BB	BB	BB	BB	AB	BB	BB	BB	BB	BB	BB	BB	BB	BB	BB	BB	BB	AB	NC	BB	AB	BB	BB	BB	BB		BB	AB	BB	BB	BB	BB	BB	AB	AB	BB	AB
1212	AX-89830930	AB	BB	AB	AA	BB	AA	BB	AA	BB	AA	BB	BB	BB	AA	BB	AB	BB	BB	BB	BB	BB	BB	BB	BB	BB	BB	BB	BB	AB	NC	BB	BB	BB	AB	AA	BB		BB	AB	BB	BB	BB	BB	BB	AB	AB	BB	AB
1213	AX-89830903	AA	BB	BB	AA	AB	AA	BB	AB	NC	AA	BB	BB	BB	AB	BB	BB	AB	AB	BB	BB	BB	BB	BB	BB	BB	BB	BB	BB	BB	NC	BB	BB	BB	AA	AB	BB		BB	BB	BB	BB	BB	BB	BB	BB	BB	BB	BB
1214	AX-89788208	AA	BB	BB	AA	BB	AA	BB	AA	BB	AA	BB	BB	BB	AA	BB	BB	BB	BB	BB	BB	BB	BB	BB	BB	BB	BB	BB	BB	BB	NC	BB	BB	BB	AA	AA	BB		BB	BB	BB	BB	BB	BB	BB	BB	BB	BB	BB
1215	AX-89888835	AB	AA	AA	AB	AA	AB	AA	AB	AA	AB	AA	AA	AA	AA	AA	AA	AA	AA	AA	AA	AA	AA	AA	AA	AA	AA	AA	AA	AA	NC	AA	AA	AA	AA	AB	AA		AA	AA	AA	AA	AA	AA	AA	AA	AA	AA	AA
1216	AX-89829554	BB	AA	AA	BB	AA	BB	AA	BB	AA	BB	AA	AA	AA	AB	AA	AA	AA	AA	AA	AA	AA	AA	AA	AA	AA	AA	AA	AA	AA	NC	AA	AA	AA	AB	AB	AA		AA	AA	AA	AA	AA	AA	AA	AA	AA	AA	AA
1217	AX-89829328	AB	AA	AA	AA	AA	AA	AA	NC	AA	AB	AA	AA	AA	AB	AA	AA	AA	AA	AA	AA	AA	AA	AA	AA	AA	AA	AA	AA	AA	NC	AA	AA	AA	AB	AB	AA		AA	AA	AA	AA	AA	AA	AA	AA	AA	AA	AA
1218	AX-89886077	AA	BB	BB	AA	BB	AA	BB	BB	BB	AA	BB	BB	BB	BB	BB	BB	BB	BB	BB	BB	BB	BB	BB	BB	BB	BB	BB	BB	BB	NC	BB	BB	BB	BB	AB	BB		BB	BB	BB	BB	BB	BB	BB	BB	BB	BB	BB
1219	AX-89886125	AB	BB	BB	NC	BB	BB	BB	AA	BB	AA	BB	BB	BB	BB	BB	BB	BB	BB	BB	BB	BB	BB	BB	BB	BB	BB	BB	BB	BB	NC	BB	BB	BB	BB	BB	BB		BB	BB	BB	BB	BB	BB	BB	BB	BB	BB	BB
1220	AX-89886916	BB	BB	BB	AB	AB	BB	AB	AB	AB	AB	BB	BB	BB	AB	BB	BB	BB	BB	AB	BB	BB	BB	BB	BB	BB	BB	BB	BB	BB	NC	BB	BB	AB	BB	BB	BB		BB	BB	BB	BB	BB	BB	BB	BB	BB	BB	BB
1221	AX-89863574	AA	AA	AA	AA	AB	AB	AB	AA	AB	AA	AA	AA	AA	AA	AA	AA	AA	AA	AB	AA	AA	AA	AA	AA	AA	AA	AA	AA	AA	BB	AA	AA	AB	AA	AA	AA		AA	AA	AA	AA	AA	AA	AA	AA	AA	AA	AA
1222	AX-89788357	AA	AA	AA	BB	AB	AA	AB	BB	AB	BB	AA	AA	AA	BB	AA	AA	AA	AA	AB	AA	AA	AA	AA	AA	AA	AA	AA	AA	AA	BB	AA	AA	AB	AB	AB	AA		AA	AA	AA	AA	AA	AA	AA	AA	AA	AA	AA
1223	AX-89848309	BB	BB	BB	BB	AB	BB	AB	BB	AB	BB	BB	BB	BB	NC	BB	BB	BB	BB	AB	BB	BB	BB	BB	BB	BB	BB	BB	BB	BB	AA	BB	BB	AB	BB	BB	BB		BB	BB	BB	BB	BB	BB	BB	BB	BB	BB	BB
1224	AX-89905182	AB	AA	AA	BB	AB	BB	AB	BB	AB	BB	AA	AA	AA	AB	AA	AA	AA	AA	AB	AA	AA	AA	AA	AA	AA	AA	AA	AA	AA	BB	AA	AA	AB	AB	AB	AA		AA	AA	AA	AA	AA	AA	AA	AA	AA	AA	AA
1225	AX-89829755	AA	AA	AA	AA	AB	AB	AA	AA	AB	AB	AA	AA	AA	AA	AA	AA	AA	AA	AB	AA	AA	AA	NC	AA	AA	AA	AA	AA	AA	NC	AA	AA	AB	AB	AA	AA		AA	AA	AA	AA	AA	AA	AA	AA	AA	AA	AA
1226	AX-89848711	AB	BB	BB	BB	AB	BB	AB	BB	AB	BB	BB	AB	BB	NC	AB	BB	BB	BB	AB	BB	BB	BB	BB	BB	BB	BB	BB	BB	BB	AA	BB	BB	AB	BB	BB	BB		AB	BB	AB	AB	BB	AB	BB	BB	BB	BB	AB
1227	AX-89905379	AA	AA	AA	AB	AB	AA	AB	AB	AB	BB	AA	AB	AA	AA	AB	AA	AA	AA	AB	AA	AA	AA	AA	AA	AA	AA	AA	AA	AA	BB	AA	AA	AB	AB	AB	AA		AB	AA	AB	AB	AA	AB	AA	AA	AA	AA	AB
1228	AX-89791341	AB	AA	AA	AA	AB	AB	NC	AA	AB	BB	AA	AA	AA	AB	AA	AA	AA	AA	AB	AA	AA	AA	AA	AA	AA	AA	AA	AA	AA	BB	AA	AA	AB	AB	AB	AA		AA	AA	AA	AA	AA	AA	AA	AA	AA	AA	AA
1229	AX-89791461	BB	BB	BB	BB	AB	AB	AB	AB	AB	BB	BB	AB	BB	NC	AB	BB	BB	BB	AB	BB	BB	BB	BB	BB	BB	BB	BB	BB	BB	AA	BB	BB	AB	BB	BB	BB		AB	BB	AB	AB	BB	AB	BB	BB	BB	BB	AB
1230	AX-89790363	AB	AA	AA	BB	AB	BB	AB	AB	AB	AA	AA	AA	AA	BB	AA	AA	AA	AB	AB	AA	AA	AA	AA	AA	AA	AA	AA	AA	AA	BB	AA	AA	AB	AB	AA	AA		AA	AA	AA	AA	AA	AA	AA	AA	AA	AA	AA
1231	AX-89848575	AB	AA	AA	BB	AB	BB	AB	BB	AB	BB	AA	AB	AA	NC	AB	AA	AA	AB	AB	AA	AA	AA	AA	AA	AA	AA	AA	AA	AA	BB	AA	AA	AB	BB	BB	AA		AB	AA	AB	AB	AA	AB	AA	AA	AA	AA	AB
1232	AX-89831423	AA	AA	AA	AA	AB	AB	AA	AA	AB	AA	AA	AA	AA	AA	AA	AA	AA	AB	AB	AA	AA	AA	AA	AA	AA	AA	AB	AA	AA	BB	AA	AA	AB	AA	AA	AA		AA	AA	AA	AA	AA	AA	AA	AA	AA	AA	AA
1233	AX-89887865	AB	AA	AA	AA	AB	BB	AB	AB	AB	AA	AA	AA	AA	AB	AA	AA	AA	AA	AB	AA	AA	AA	AA	AA	AA	AA	AA	AA	AA	BB	AA	AA	AB	AB	AB	AA		AA	AA	AA	AA	AA	AA	AA	AA	AA	AA	AA
1234	AX-89905267	AA	AA	AA	AA	AB	BB	AB	AB	AB	AA	AA	AB	AA	AA	AB	AA	AA	AB	AB	AA	AA	AA	AA	AA	AA	AA	AA	AA	AA	BB	AA	AA	AB	AA	AA	AA		AB	AA	AB	AB	AA	AB	AA	AA	AA	AA	AB
1235	AX-89848537	BB	AA	AA	BB	AB	BB	AB	BB	AB	BB	AA	AB	AA	NC	AB	AA	AA	AA	AB	AA	AA	AA	AA	AA	AA	AA	AA	AA	AA	BB	AA	AA	AB	BB	BB	AA		AB	AA	AB	AB	AA	AB	AA	AA	AA	AA	AB
1236	AX-89867198	BB	AA	AA	BB	AA	AB	BB	BB	BB	BB	AA	BB	BB	BB	AA	BB	BB	BB	BB	BB	AA	AA	BB	BB	BB	BB	BB	BB	AA	BB	BB	BB	AA	AA	AB	BB		NC	NC	NC	NC	NC	NC	NC	NC	NC	NC	NC
1237	AX-89831443	BB	BB	BB	BB	BB	BB	BB	BB	BB	BB	BB	BB	BB	AB	BB	BB	BB	BB	BB	BB	BB	BB	BB	BB	BB	BB	BB	BB	BB	NC	BB	BB	BB	AB	AB	BB		BB	BB	BB	BB	BB	BB	BB	BB	BB	BB	BB
1238	AX-89790984	AB	BB	BB	AB	BB	BB	BB	AB	BB	AB	BB	BB	AB	BB	BB	BB	BB	BB	BB	BB	BB	BB	BB	BB	BB	BB	BB	BB	BB	NC	BB	BB	BB	BB	BB	BB		BB	BB	BB	BB	BB	BB	BB	BB	BB	BB	BB
1239	AX-89863735	AA	AA	AA	AA	AA	AB	AA	AA	AA	AA	AA	AA	AB	AA	AA	AA	AA	AA	AA	AA	AA	AA	AA	AA	AA	AA	AA	AA	AA	NC	AA	AA	AA	AB	AB	AA		AA	AA	AA	AA	AA	AA	AA	AA	AA	AA	AA
1240	AX-89791533	AB	BB	BB	BB	BB	BB	BB	NC	BB	NC	BB	BB	BB	AA	BB	BB	BB	BB	BB	BB	BB	BB	BB	BB	BB	BB	BB	BB	BB	NC	BB	BB	BB	BB	BB	BB		BB	BB	BB	BB	BB	BB	BB	BB	BB	BB	BB
1241	AX-89789175	BB	BB	BB	BB	BB	BB	BB	AA	BB	BB	BB	BB	BB	AA	BB	BB	BB	BB	BB	BB	BB	BB	BB	BB	BB	BB	BB	BB	BB	NC	BB	BB	AB	AA	AB	BB		BB	BB	BB	BB	BB	BB	BB	BB	BB	BB	BB
1242	AX-89857344	BB	AA	AA	BB	AA	BB	BB	AA	AA	BB	AA	AA	BB	AA	AA	AA	BB	AA	AA	AA	AA	AA	AA	AA	AA	AA	AA	AA	AA	NC	BB	AA	AA	AA	AB	AA		NC	NC	NC	NC	NC	NC	NC	NC	NC	NC	NC
1243	AX-89888660	BB	BB	BB	BB	BB	BB	BB	AA	BB	BB	BB	BB	BB	AA	BB	BB	BB	BB	BB	BB	BB	BB	BB	BB	BB	BB	BB	BB	BB	NC	BB	BB	BB	AA	AB	BB		BB	BB	BB	BB	BB	BB	BB	BB	BB	BB	BB
1244	AX-89791550	BB	BB	BB	BB	BB	AB	BB	AA	BB	NC	BB	BB	BB	AB	BB	BB	BB	BB	BB	BB	BB	BB	BB	BB	BB	BB	BB	BB	BB	BB	BB	BB	BB	AB	BB	BB		BB	BB	BB	BB	BB	BB	BB	BB	BB	BB	BB
1245	AX-89831463	BB	AA	AA	BB	AA	BB	AA	BB	AA	BB	AA	AA	AA	AB	AA	AA	AA	AA	AA	AA	AA	AA	AA	AA	AA	AA	AA	AA	AA	NC	AA	AA	AA	AB	AB	AA		AA	AA	AA	AA	AA	AA	AA	AA	AA	AA	AA
1246	AX-89905333	AB	AA	AA	AB	AA	AB	AA	BB	AA	AA	AA	AB	BB	AB	AB	AA	AA	AA	AA	AA	AA	AA	AA	AA	AA	AA	AA	AA	AA	NC	AA	AA	AA	AA	AA	AA		AA	AA	AB	AB	AA	AB	AA	AA	AA	AA	AB
1247	AX-89863745	BB	AA	AA	BB	AA	BB	AA	BB	AA	BB	AA	AA	AA	AA	AA	AA	AA	AA	AA	AA	AA	AA	AA	AA	AA	AA	AA	AA	AA	NC	AA	AA	AA	AB	AB	AA		AA	AA	AA	AA	AA	AA	AA	AA	AA	AA	AA
1248	AX-89791490	AB	BB	BB	AB	BB	BB	BB	AB	BB	AB	BB	BB	BB	BB	BB	BB	BB	BB	BB	BB	BB	BB	BB	BB	BB	BB	BB	BB	BB	NC	BB	BB	BB	BB	BB	BB		BB	BB	BB	BB	BB	BB	BB	BB	BB	BB	BB
1249	AX-89848694	AA	BB	BB	BB	BB	AA	BB	BB	BB	AB	BB	AB	BB	BB	AB	BB	BB	BB	BB	BB	BB	BB	BB	BB	BB	BB	BB	BB	BB	NC	BB	BB	BB	AA	AB	BB		BB	BB	AB	AB	BB	AB	BB	BB	BB	BB	AB
1250	AX-89790946	BB	AA	AA	BB	AA	AB	AA	BB	AA	BB	AA	AB	AA	NC	AB	AA	AA	AA	AA	AA	AA	AA	NC	NC	AA	AA	AA	AA	AA	AA	AA	AB	AA	BB	BB	AA		AA	AA	AB	AB	AA	AB	AA	AA	AA	AA	AB
1251	AX-89790948	BB	AA	AA	AB	AA	BB	AA	AB	AA	AB	AA	AA	AA	BB	AA	AA	AA	AA	AA	AA	AA	AA	AA	AA	AA	AA	AA	AA	AA	NC	AA	AA	AA	AA	BB	AA		AA	AA	AA	AA	AA	AA	AA	AA	AA	AA	AA
1252	AX-89848759	AA	AB	AB	AA	AA	AA	AA	AA	AB	AA	AB	AB	AA	NC	AB	AA	AA	AA	AA	AB	AA	AA	AA	AA	AA	AA	AB	AA	AB	AA	AA	AA	AB	AA	AA	AB		AA	AA	AB	BB	AB	BB	AB	AB	AA	AA	BB
1253	AX-89848547	AB	AB	AB	AB	BB	AB	BB	AB	AB	AA	AB	AB	AB	AB	AB	BB	BB	AB	BB	AB	BB	BB	BB	BB	BB	AB	AB	BB	AB	BB	BB	BB	AB	AA	AA	AB		BB	BB	AB	AA	AB	AA	AB	AB	BB	BB	AA
1254	AX-89831754	BB	AB	AB	BB	BB	BB	AB	BB	AB	BB	AA	AB	AA	BB	AB	BB	BB	AB	BB	AA	AB	BB	AB	BB	AB	AB	AB	BB	AB	BB	BB	AA	AB	BB	BB	AB		AB	BB	AA	AA	AB	AB	AA	AB	AB	AB	AB
1255	AX-89888922	AB	BB	AB	BB	AB	BB	AB	AB	BB	BB	AA	BB	AA	BB	AB	BB	BB	BB	BB	AB	BB	BB	BB	BB	BB	BB	BB	BB	AB	BB	BB	AB	AB	BB	NC	BB		AB	BB	NC	NC	AB	AB	NC	AB	AB	AB	AB
1256	AX-89791153	BB	AB	AB	BB	BB	BB	AB	AB	AB	BB	AB	BB	BB	NC	BB	BB	BB	AB	BB	AB	BB	BB	BB	BB	BB	BB	AB	BB	AB	BB	BB	BB	AB	BB	BB	AB		BB	BB	BB	AB	AB	AB	AB	AB	BB	BB	AB
1257	AX-89791163	BB	AB	AB	AB	AA	AB	NC	AB	AB	AB	BB	AB	BB	BB	AB	NC	AA	AB	AA	BB	AB	AA	AB	AA	AB	AB	AB	AA	AB	AA	AA	BB	AB	BB	AB	AB		AB	AA	BB	BB	AB	AB	BB	AB	AB	AB	AB
1258	AX-89831712	AA	AB	AB	AB	AB	AA	AA	AB	AB	AB	AA	AB	AA	AB	AB	AB	BB	AB	AB	AA	AB	BB	AB	BB	AB	AB	AB	BB	AB	BB	AB	AA	AB	AA	AA	AA		AB	AB	AA	AA	BB	AB	AA	AA	AB	AB	AB
1259	AX-89791140	BB	AB	AB	AB	AB	AB	AA	AA	AB	AB	AA	AB	AA	BB	AB	AB	BB	AB	AB	AA	AB	BB	AB	BB	AB	AB	AB	BB	AB	BB	AB	AA	AB	BB	AB	AA		AB	AB	AA	AA	BB	AB	AA	AA	AB	AB	AB
1260	AX-89831707	BB	AB	AB	AB	AB	BB	BB	BB	AB	AB	BB	AB	BB	AB	AB	AB	AA	AB	AB	BB	AB	AA	AB	AB	AB	AB	AB	AA	AB	AA	AB	BB	AB	BB	BB	BB		AB	AB	BB	BB	AA	AB	BB	BB	AB	AB	AB
1261	AX-89791127	AA	AB	AB	AB	AA	AA	AB	AA	AB	AA	AB	AA	AA	AB	AA	AA	AA	AB	AA	AB	AA	AA	AA	AA	AA	AA	AB	AA	AB	AA	AA	AA	AB	AA	AA	AB		AA	AA	AA	AB	AA	AB	AB	AB	AA	AA	AB
1262	AX-89791125	AA	AB	AB	AB	AA	AA	AB	AA	AB	AA	AB	AA	AA	AB	AA	AA	AA	AB	AA	AB	AA	AA	AA	AA	AA	AA	AB	AA	AB	AA	AA	AA	AB	AA	AA	AB		AA	AA	AA	AB	AA	AB	AB	AB	AA	AA	AB
1263	AX-89863751	AA	NC	AB	AA	BB	AA	AB	AB	AB	AA	AB	BB	AB	AB	AB	BB	BB	AB	BB	AB	BB	BB	AB	BB	BB	AB	AB	BB	AB	BB	BB	BB	AB	AA	AA	AB		BB	BB	AB	AB	BB	AB	AB	AB	BB	BB	AB
1264	AX-89831669	AA	AB	AB	AB	BB	AA	AB	AA	AB	AB	AB	BB	BB	AB	BB	BB	BB	AB	BB	AB	BB	BB	BB	AB	BB	BB	AB	BB	AB	BB	BB	NC	AB	AA	AA	AB		BB	BB	BB	NC	BB	NC	NC	AB	BB	BB	AB
1265	AX-89831677	AB	AB	AB	AA	AB	AA	BB	AB	AB	AA	BB	AB	BB	AA	AB	AB	AA	AB	AB	BB	AB	AA	AB	AA	AB	AB	AB	AA	AB	AA	AB	BB	AB	AB	AB	BB		AB	AB	BB	BB	AA	AB	BB	BB	AB	AB	AB
1266	AX-89863754	AA	AB	AB	AA	AB	AA	AA	AB	AB	AA	AA	AB	AB	AA	AB	AB	NC	AB	AB	AA	AB	BB	AB	BB	AB	AB	AB	BB	AB	BB	AB	AA	AB	AA	AA	AA		AB	AB	AA	AA	BB	AB	AA	AA	AB	AB	AB
1267	AX-89888846	AA	AB	AB	AB	BB	AB	BB	AB	AB	AB	AB	BB	BB	NC	BB	BB	BB	AB	BB	AB	BB	BB	BB	BB	BB	BB	AB	BB	AB	BB	BB	BB	AB	AB	BB	AB		BB	BB	BB	AB	BB	AB	AB	AB	BB	BB	AB
1268	AX-89791068	AB	AB	AB	BB	AB	AB	AA	AB	AB	NC	AA	AB	AA	AA	AB	AB	AB	AB	AB	AA	AB	BB	AB	NC	AB	AB	AB	AB	AB	AB	AB	AA	AB	AB	AB	AA		AB	AB	AA	AA	BB	AB	AA	AA	AB	AB	AB
1269	AX-89804657	AB	AB	AB	AB	BB	AB	BB	AA	BB	BB	AB	BB	BB	AB	BB	BB	BB	BB	BB	BB	BB	BB	BB	BB	BB	BB	BB	BB	AB	NC	BB	BB	AB	BB	BB	BB		BB	BB	BB	AB	BB	AB	AB	AB	BB	BB	AB
1270	AX-89791063	BB	AB	AB	AB	BB	AB	AB	AB	AB	AB	AB	BB	BB	BB	BB	BB	BB	AB	BB	BB	BB	BB	BB	BB	BB	BB	AB	BB	AB	BB	BB	BB	AB	BB	AB	AB		BB	BB	BB	AB	BB	AB	AB	AB	BB	BB	AB
1271	AX-89791062	BB	AB	AB	AB	AB	AA	BB	AB	AB	AA	BB	AB	BB	BB	AB	AB	AA	AB	AB	BB	AB	AA	AB	AA	AB	AB	AB	AA	AB	AA	AB	BB	AB	BB	AA	BB		AB	NC	BB	BB	AA	AB	BB	BB	AB	AB	AB
1272	AX-89832069	BB	AB	AB	BB	BB	BB	BB	BB	BB	BB	BB	BB	BB	NC	AB	AB	AB	BB	AB	BB	BB	AB	BB	AB	AB	AB	BB	BB	AB	AB	BB	BB	BB	BB	BB	BB		AB	AB	AB	BB	AB	BB	BB	BB	AB	AB	BB
1273	AX-89832019	BB	AB	AB	BB	AB	BB	NC	BB	BB	BB	BB	BB	AA	BB	AA	AA	AB	AB	AA	AB	BB	AB	BB	AB	AB	AB	BB	BB	AB	AB	AB	AB	BB	BB	BB	AB		BB	NC	AB	BB	AB	BB	BB	AB	AB	AB	BB
1274	AX-89848737	AB	AB	AB	AB	AB	AB	AB	BB	AA	AB	AA	AA	BB	AB	BB	BB	AB	AB	BB	AB	AA	AB	NC	AB	AB	AB	AA	AA	AB	AB	NC	AB	AA	AB	AB	AB		AA	NC	AB	AA	AB	AA	AA	AB	AB	AB	AA
1275	AX-89905364	BB	AB	AB	AB	AB	BB	AB	AB	AA	NC	AA	AA	AB	AB	BB	BB	AB	AB	BB	AB	AA	AB	AA	AB	AB	AB	AA	AA	AB	AB	AB	AB	AA	AB	AB	AB		AA	NC	AB	AA	AB	AA	AA	AB	AB	AB	AA
1276	AX-89905375	BB	AB	AB	BB	AB	BB	AB	AB	BB	BB	BB	BB	AA	BB	AA	AA	AB	AB	AA	AB	BB	AB	BB	AB	AB	AB	BB	BB	AB	AB	AB	AB	BB	BB	BB	AB		BB	NC	AB	BB	AB	BB	BB	AB	AB	AB	BB
1277	AX-89789222	BB	BB	BB	BB	AB	AA	BB	BB	BB	BB	BB	BB	BB	BB	BB	BB	BB	BB	BB	BB	BB	BB	BB	BB	BB	BB	BB	BB	BB	NC	BB	BB	BB	AB	AA	BB		BB	BB	BB	BB	BB	BB	BB	BB	BB	BB	BB
1278	AX-89789187	AA	AB	BB	BB	AB	AA	AB	BB	BB	BB	BB	BB	AA	BB	AB	NC	AB	AB	AB	AB	AB	BB	BB	BB	BB	BB	BB	AB	BB	BB	AB	AB	AB	BB	BB	AB		BB	NC	BB	BB	BB	BB	BB	NC	BB	BB	BB
1279	AX-89829675	AB	AB	AA	AB	AB	BB	AA	AB	AA	AB	AA	AA	AA	BB	BB	AB	AA	AB	AB	AB	AB	AA	AB	AB	AA	AB	AB	AB	AA	AA	AA	AB	AB	BB	BB	AB		AA	NC	NC	AA	AA	AA	AA	NC	AA	AA	AA
1280	AX-89829599	AB	BB	BB	BB	BB	AA	BB	AB	BB	AB	BB	BB	BB	BB	BB	BB	BB	BB	BB	BB	BB	BB	BB	BB	BB	BB	BB	BB	BB	NC	BB	BB	BB	BB	AB	BB		BB	BB	BB	BB	BB	BB	BB	BB	BB	BB	BB
1281	AX-89829705	AB	AB	BB	AB	NC	AA	AB	AB	BB	BB	BB	BB	AA	AA	AB	AB	AB	AB	AB	AB	AB	BB	BB	BB	BB	BB	BB	AB	BB	BB	AB	AB	BB	AA	AA	AB		BB	NC	BB	BB	BB	BB	BB	NC	BB	BB	BB
1282	AX-89829712	AB	BB	BB	AB	BB	BB	BB	BB	BB	AB	BB	BB	AB	AB	AB	BB	BB	BB	BB	BB	BB	BB	BB	BB	BB	NC	BB	BB	BB	NC	BB	BB	AB	AB	AB	BB		BB	BB	NC	BB	BB	BB	BB	BB	BB	BB	BB
1283	AX-89789281	AB	BB	BB	AB	BB	AA	BB	AA	BB	AB	BB	BB	BB	AB	BB	BB	BB	BB	BB	BB	BB	BB	BB	BB	BB	BB	BB	BB	BB	NC	BB	BB	BB	AB	AB	BB		BB	BB	BB	BB	BB	BB	BB	BB	BB	BB	BB
1284	AX-89828601	BB	BB	BB	AB	BB	BB	BB	AB	BB	AB	BB	BB	BB	BB	AB	BB	BB	BB	BB	BB	BB	BB	BB	BB	BB	AB	BB	BB	BB	BB	BB	BB	AB	AA	BB	BB		BB	BB	NC	BB	BB	BB	BB	BB	BB	BB	BB
1285	AX-89829704	AB	AA	AA	AB	AA	BB	AA	BB	AA	AB	AA	AA	AA	AB	AB	AA	AA	AA	AA	AA	AA	AA	AA	AA	AA	AB	AA	AA	AA	NC	AA	AA	AB	AB	AB	AA		AA	AA	NC	AA	AA	AA	AA	AA	AA	AA	AA
1286	AX-89789115	BB	AA	AA	AA	AA	BB	AA	AA	AA	AA	AA	AA	AA	AA	AA	AA	AA	AA	AA	AA	AA	AA	AA	AA	AA	AA	AA	AA	AA	AA	AA	AA	AA	AA	AA	AA		AA	AA	AA	AA	AA	AA	AA	AA	AA	AA	AA
1287	AX-89829636	AB	AB	BB	AB	AB	BB	AB	AB	BB	AB	BB	BB	AA	BB	AB	AB	AB	AB	AB	AB	AB	BB	BB	BB	BB	BB	BB	AB	BB	BB	AB	AB	AB	BB	BB	AB		BB	NC	BB	BB	BB	BB	BB	NC	BB	BB	BB
1288	AX-89789151	BB	AB	BB	BB	AB	BB	AB	AB	BB	BB	BB	BB	AA	AB	AB	AB	AB	AB	AB	AB	AB	BB	BB	BB	BB	BB	BB	AB	BB	BB	AB	AB	AB	AB	AB	AB		BB	NC	BB	BB	BB	BB	BB	NC	BB	BB	BB
1289	AX-89791345	AB	AB	AB	AA	AB	AB	AB	AA	AA	BB	AA	AA	BB	AB	BB	BB	AB	AB	BB	AB	AA	AB	AA	AA	NC	AB	AA	AA	AB	NC	AB	AB	AA	AB	AB	AB		AA	NC	AB	AA	AB	AA	AA	AB	AB	AB	AA
1290	AX-89831424	BB	AB	AA	BB	AA	BB	NC	BB	AA	BB	AA	AA	BB	BB	AB	AB	AB	AA	AA	AA	AA	AB	AA	AA	AA	AA	AA	AA	AA	AA	AB	AA	AA	BB	BB	AA		AA	NC	NC	AA	NC	AA	AA	NC	NC	NC	AA
1291	AX-89831916	BB	AB	AA	BB	AA	BB	AB	BB	AA	BB	AA	AA	BB	BB	AB	AB	AB	AA	AB	AA	AA	AB	AA	AA	AA	AA	AA	AA	AA	AA	AB	AA	AA	BB	BB	AA		AA	NC	NC	AA	NC	AA	AA	NC	NC	AA	AA
1292	AX-89829403	BB	AB	AA	AB	AA	BB	BB	AB	AB	BB	AB	AB	AA	AB	AB	BB	AB	BB	BB	BB	AB	AA	AB	AB	AB	AB	BB	BB	AB	AB	AB	BB	AA	BB	AB	BB		AA	AB	AA	AA	AA	AA	AA	AB	AA	AB	AA
1293	AX-89788889	BB	AB	AA	BB	AA	BB	BB	AB	AA	BB	AB	AA	AA	AB	AB	AB	AB	NC	AB	AB	AB	AA	AA	AA	AA	AA	AB	AB	AB	AA	AB	AB	AA	AB	AB	BB		AA	NC	AA	AA	AA	AA	AA	NC	AA	NC	AA
1294	AX-89829455	AB	BB	BB	AA	BB	AA	BB	AB	BB	AB	BB	BB	BB	BB	BB	BB	BB	BB	BB	BB	BB	BB	BB	BB	BB	BB	BB	BB	BB	NC	BB	BB	BB	AA	AA	BB		BB	BB	BB	BB	BB	BB	BB	BB	BB	BB	BB
1295	AX-89804414	AB	BB	BB	AA	BB	BB	BB	BB	BB	AB	BB	BB	BB	BB	BB	BB	BB	BB	BB	BB	BB	BB	BB	BB	BB	BB	BB	BB	BB	NC	BB	BB	BB	AB	BB	BB		BB	BB	BB	BB	BB	BB	BB	BB	BB	BB	BB
1296	AX-89811273	BB	AA	BB	AA	BB	AB	AA	AB	BB	AB	AA	BB	AB	BB	AA	AB	AA	AB	AB	AB	AA	BB	BB	BB	BB	BB	AB	AB	AA	BB	AA	AB	BB	AA	AB	AB		BB	NC	BB	BB	BB	BB	BB	NC	BB	NC	BB
1297	AX-89828613	AB	AA	AB	BB	AB	AA	BB	BB	NC	BB	AB	BB	AA	NC	AA	AA	AB	AB	AB	AB	AB	AB	BB	AB	AB	AB	BB	AB	AB	AB	BB	AB	AB	AB	BB	AB		BB	NC	AB	BB	AB	BB	BB	AB	AB	AB	BB
1298	AX-89788225	BB	AB	AB	BB	BB	BB	BB	BB	BB	AB	NC	BB	BB	BB	AB	AB	AB	BB	BB	BB	BB	AB	BB	AB	AB	AB	BB	BB	AB	NC	BB	BB	AB	BB	BB	BB		BB	AB	AB	BB	AB	BB	BB	BB	AB	AB	BB
1299	AX-89788232	AA	BB	AB	BB	AB	AB	AB	BB	AA	BB	AA	AA	NC	NC	BB	BB	BB	AB	AB	AB	AB	AB	AA	AB	AB	AB	AB	AB	AB	AB	AB	AB	AB	BB	AB	AB		AA	NC	NC	AA	AB	AA	AA	AB	NC	AB	AA
1300	AX-89789315	BB	BB	BB	AA	BB	BB	AA	AA	BB	AA	BB	BB	BB	AA	BB	BB	AA	BB	BB	BB	BB	BB	BB	BB	BB	BB	BB	AB	BB	BB	AA	BB	BB	AA	AA	AA		BB	NC	BB	BB	BB	BB	BB	NC	BB	NC	BB
1301	AX-89829802	BB	BB	BB	BB	AB	BB	BB	BB	BB	AB	BB	BB	AB	BB	BB	BB	BB	BB	BB	BB	BB	BB	BB	BB	BB	BB	BB	BB	BB	NC	BB	AB	BB	BB	BB	BB		BB	BB	BB	BB	BB	BB	BB	BB	BB	BB	BB
1302	AX-89789335	AA	AB	AA	AB	AB	AA	AB	AA	AA	AB	AB	AA	AB	AB	AB	AB	AB	AB	AB	AB	AB	AA	AA	AA	AA	AA	AB	AB	AB	AB	AB	AB	AA	AA	AA	BB		AA	NC	AA	AA	AA	AA	AA	NC	AA	NC	AA
1303	AX-89848434	AB	AB	AA	BB	AA	BB	AB	BB	AA	BB	AB	AA	AB	BB	AB	AB	AB	AB	AB	AB	AB	AA	AA	AA	AA	AA	AB	AB	AB	AA	AB	AB	AA	BB	AB	BB		AA	NC	AA	AA	AA	AA	AA	NC	AA	NC	AA
1304	AX-89789337	BB	BB	BB	AB	BB	AA	BB	AA	BB	BB	BB	BB	BB	AB	BB	BB	BB	BB	BB	BB	BB	BB	BB	BB	BB	BB	BB	BB	BB	NC	BB	BB	BB	AB	AB	BB		BB	BB	BB	BB	BB	BB	BB	BB	BB	BB	BB
1305	AX-89788283	BB	AB	AB	BB	AA	BB	AA	BB	AA	BB	AA	AA	AA	BB	AB	AB	AB	AA	AA	AA	AA	AB	AA	AB	AB	AB	AA	AA	AB	AB	AA	AA	AA	BB	BB	AA		AA	AB	AB	AA	AB	AA	AA	AA	AB	AB	AA
1306	AX-89885786	BB	AB	AB	AB	AA	AB	AA	AB	AA	AB	AA	AA	AA	AB	AB	AB	AB	AA	AA	AA	AA	AB	AA	AB	AB	AB	AA	AA	AB	AB	AA	AA	AA	BB	AB	AA		AA	AB	AB	AA	AB	AA	AA	AA	AB	AB	AA
1307	AX-89829819	AA	AA	AA	AB	AA	BB	AA	BB	AA	AA	AA	AA	AA	AB	AA	AA	AA	AA	AA	AA	AA	AA	AA	AA	AA	AA	AA	AA	AA	NC	AA	AA	AA	AB	AB	AA		AA	AA	AA	AA	AA	AA	AA	AA	AA	AA	AA
1308	AX-89829844	AB	BB	BB	BB	AB	BB	BB	AB	BB	BB	BB	BB	AA	BB	BB	BB	BB	BB	BB	BB	BB	BB	BB	BB	BB	BB	BB	BB	BB	AB	BB	AB	BB	BB	AB	BB		BB	BB	BB	BB	BB	BB	BB	BB	BB	BB	BB
1309	AX-89789387	BB	AA	AA	AA	AA	AB	AA	BB	AA	AB	AA	AA	AA	BB	AA	AA	AA	AA	AA	AA	AA	AA	AA	AA	AA	AA	AA	AA	AA	NC	AA	AA	AA	AB	AB	AA		AA	AA	AA	AA	AA	AA	AA	AA	AA	AA	AA
1310	AX-89868188	BB	NC	AA	AB	AB	BB	AA	BB	AA	AB	AA	AB	BB	AB	AA	AA	AA	AA	AB	AB	AA	AA	AB	AA	AA	AA	AA	AA	AA	NC	AA	AB	AA	AB	AB	AA		AB	AA	AB	AA	AA	AA	AB	AA	AB	AA	AB
1311	AX-89829838	BB	AA	AA	BB	AB	BB	AA	BB	AA	BB	AA	AA	AB	BB	AA	AA	AA	AA	AA	AA	AA	AA	AA	NC	AA	AA	AA	AA	AA	NC	AA	AB	AA	BB	BB	AA		AA	AA	AA	AA	AA	AA	AA	NC	AA	AA	AA
1312	AX-89829886	BB	BB	BB	AB	BB	BB	BB	BB	BB	AB	BB	BB	BB	AB	BB	BB	BB	BB	BB	BB	BB	BB	BB	BB	BB	BB	BB	BB	BB	NC	BB	BB	BB	AB	AB	BB		BB	BB	BB	BB	BB	BB	BB	BB	BB	BB	BB
1313	AX-89831942	AA	AB	AB	AA	AA	AA	AA	AA	AA	AA	AA	AA	AA	AA	AB	AB	AB	AA	AB	AA	AA	AB	AA	AB	AB	AB	AA	AA	AB	NC	AA	AA	AA	AA	AA	AA		AA	AB	AB	AA	AB	AA	AA	AA	AB	AB	AA
1314	AX-89791389	AB	AB	AB	AA	BB	AA	NC	AB	BB	BB	BB	BB	BB	AB	AB	AB	AB	BB	AB	BB	BB	AB	BB	AB	AB	AB	BB	BB	AB	NC	BB	BB	BB	BB	AA	BB		BB	AB	NC	BB	NC	BB	BB	BB	AB	AB	BB
1315	AX-89868196	BB	BB	BB	AB	BB	BB	BB	BB	BB	AB	BB	BB	BB	AB	BB	BB	BB	BB	BB	BB	BB	BB	BB	BB	BB	BB	BB	BB	BB	NC	BB	BB	BB	AB	AB	BB		BB	BB	BB	BB	BB	BB	BB	BB	BB	BB	BB
1316	AX-89789511	AA	AB	AA	AA	AB	AA	AB	AB	AA	AB	AB	AB	AB	NC	AB	AB	AB	AB	BB	BB	AB	AA	AB	AA	AA	AA	AB	AB	AB	AB	AB	AB	AA	AA	AB	BB		AB	AB	AB	AA	AA	AA	AB	AB	AB	AB	AB
1317	AX-89905202	AB	AB	AA	BB	AB	BB	AB	BB	AA	BB	AB	AB	AB	AB	AB	AB	AB	AB	BB	BB	AB	AA	AB	AA	AA	AA	AB	AB	AB	AB	AB	AB	AA	AB	AB	BB		AB	AB	AB	AA	AA	AA	AB	AB	AB	AB	AB
1318	AX-89789529	AA	AB	AA	BB	AB	AB	AB	BB	AA	BB	AB	AB	AB	NC	AB	AB	AB	AB	NC	BB	AB	AA	AB	AA	AA	AA	AB	AB	AB	AB	AB	NC	AA	BB	AB	BB		AB	AB	AB	AA	AA	AA	AB	AB	AB	AB	AB
1319	AX-89830012	AB	AB	AA	AA	AB	BB	AB	AB	AA	AA	AB	AB	AB	NC	AB	AB	AB	AB	BB	BB	AA	AA	AB	AA	AA	AA	AB	AB	AB	AB	AB	AB	AA	AB	AA	BB		AB	AB	AB	AA	AA	AA	AB	AB	AB	AB	AB
1320	AX-89789555	AA	AB	AA	BB	AB	AB	AB	BB	AA	BB	AB	AB	AB	NC	AB	AB	AB	AB	BB	BB	AA	AA	AB	AA	AA	AA	AB	AB	AB	AB	AB	AB	AA	BB	AB	BB		AB	AB	AB	AA	AA	AA	AB	AB	AB	AB	AB
1321	AX-89857094	BB	AB	AA	BB	AB	BB	AB	BB	AA	BB	AB	AB	AB	BB	AB	AB	AB	AB	BB	BB	AA	AA	AB	AA	AA	AA	AB	AB	AB	AB	AB	AB	AA	BB	BB	BB		AB	AB	AB	AA	AA	AA	AB	AB	AB	AB	AB
1322	AX-89905208	BB	BB	BB	BB	BB	BB	BB	BB	BB	BB	BB	BB	BB	BB	BB	BB	BB	BB	BB	BB	BB	BB	BB	BB	BB	BB	BB	BB	BB	NC	BB	BB	BB	BB	BB	BB		BB	BB	BB	BB	BB	BB	BB	BB	BB	BB	BB
1323	AX-89789751	AA	BB	AB	AA	BB	AA	AB	AA	BB	AA	BB	BB	BB	BB	AB	BB	BB	BB	BB	BB	AB	AB	AB	BB	BB	AB	BB	BB	BB	NC	BB	BB	BB	AA	AA	BB		AB	BB	BB	AB	BB	BB	AB	AB	BB	BB	AB
1324	AX-89830239	BB	AA	AB	BB	AB	BB	NC	AB	NC	BB	AA	AB	AB	BB	AB	AA	AA	AA	AB	AB	AB	AB	BB	AA	AA	BB	AA	AA	AA	BB	AA	AA	AA	BB	BB	AA		BB	AA	AB	AB	AA	AA	BB	AB	AB	AA	BB
1325	AX-89830204	BB	AA	AB	BB	AB	BB	NC	BB	AA	BB	AA	AB	BB	BB	AB	AA	AA	AA	AB	AB	AB	AB	BB	AA	AA	BB	AA	AA	AA	BB	AA	AA	AA	BB	BB	AA		BB	AA	AB	AB	AA	AA	BB	AB	AB	AA	BB
1326	AX-89830187	AB	AA	AB	AA	AA	AA	AB	AB	AA	AB	AA	AA	AB	AA	AB	AA	AA	AA	AA	AA	AB	AB	AB	AA	AA	AB	AA	AA	AA	AA	AA	AA	AA	AA	AA	AA		AB	AA	AA	AB	AA	AA	AB	AB	AA	AA	AB
1327	AX-89804506	BB	AA	AB	BB	AB	BB	AB	BB	AA	BB	AA	AB	BB	BB	AB	AA	AA	AA	AB	AB	AB	AB	BB	AA	AA	BB	AA	AA	AA	BB	AA	AA	AA	BB	BB	AA		BB	AA	AB	AB	AA	AA	BB	AB	AB	AA	BB
1328	AX-89830153	AA	AA	AB	AA	AB	AA	NC	AB	AA	AA	AA	AB	BB	AA	AB	AA	AA	AA	AB	AB	AB	AB	BB	AA	AA	BB	AA	AA	AA	BB	AA	AA	AA	AA	AA	AA		BB	AA	AB	AB	AA	AA	BB	AB	AB	AA	BB
1329	AX-89830152	AB	AA	AB	BB	AB	BB	AB	AB	AA	BB	AA	AB	BB	BB	AB	AA	AA	AA	AB	AB	AB	AB	BB	AA	AA	BB	AA	AA	AA	BB	AA	AA	AA	BB	BB	AA		BB	AA	AB	AB	AA	AA	BB	AB	AB	AA	BB
1330	AX-89848487	AA	AA	AB	AA	AB	AB	AB	AB	AA	AA	AA	AB	BB	AB	AB	AA	AA	AA	AB	AB	AB	AB	BB	AA	AA	BB	AA	AA	AA	BB	AA	AA	AA	AB	AA	AA		BB	AA	AB	AB	AA	AA	BB	AB	AB	AA	BB
1331	AX-89830143	AA	AA	AB	AA	AB	AA	NC	AB	AA	AB	AA	AA	BB	AB	AB	AA	AA	AA	AA	AA	AA	AA	NC	AA	AA	NC	AA	AA	AA	AB	AA	AA	AA	AB	AB	AA		NC	AA	AB	AB	AA	AA	NC	AB	AB	AA	NC
1332	AX-89830130	AA	AA	AB	AA	AA	AA	AB	AB	AA	AA	AA	AA	AB	AA	AB	AA	AA	AA	AA	AA	AB	AB	AB	AA	AA	AB	AA	AA	AA	AA	AA	AA	AA	AA	AA	AA		AB	AA	AA	AB	AA	AA	AB	AB	AA	AA	AB
1333	AX-89830771	AA	AB	AB	AA	AA	AB	AB	AA	AA	AA	AA	AA	AB	AA	AB	AA	AB	AA	AA	AA	AB	BB	AB	AB	AA	AB	AA	AA	AB	AA	AA	AA	AB	AB	AB	AA		AB	AA	AA	AB	AA	AA	AB	AB	AA	AA	AB
1334	AX-89790211	AA	AB	AB	AB	AA	AB	NC	BB	AA	AA	AA	AA	AB	NC	AB	AA	AB	AA	AA	AA	AB	BB	AB	AB	AA	AB	AA	AA	AB	AA	AA	AA	AB	AB	AA	AA		AB	AA	AA	AB	AA	AA	AB	AB	AA	AA	AB
1335	AX-89790274	BB	AB	AB	AB	AA	AB	AB	AA	AA	AA	AA	AA	AB	NC	AB	AA	AB	AA	AA	AA	AB	BB	AB	AB	AA	AB	AA	AA	AB	AA	AA	AA	AB	AB	AB	AA		AB	AA	AA	AB	AA	AA	AB	AB	AA	AA	AB
1336	AX-89830842	BB	AB	AB	BB	BB	AA	AB	BB	BB	BB	BB	BB	NC	BB	AB	BB	AB	BB	BB	BB	AB	AA	AB	AB	BB	AB	BB	BB	AB	NC	BB	NC	AB	BB	AA	BB		AB	BB	BB	AB	BB	BB	AB	AB	BB	BB	AB
1337	AX-89830851	AA	AB	AB	AA	AA	AB	AB	AB	AA	AB	AA	AA	AB	AB	AB	AA	AB	AA	AA	AA	AB	BB	AB	AB	AA	AB	AA	AA	AB	AA	AA	AA	AB	AB	AB	AA		AB	AA	AA	AB	AA	AA	AB	AB	AA	AA	AB
1338	AX-89830877	BB	AB	AB	BB	AA	AB	AB	AB	AA	BB	AA	AA	AB	AB	AB	AA	AB	AA	AA	AA	AB	BB	AB	AB	AA	AB	AA	AA	AB	AA	AA	AA	AB	AB	AB	AA		AB	AA	AA	AB	AA	AA	AB	AB	AA	AA	AB
1339	AX-89807581	BB	AB	AB	BB	AA	BB	AB	BB	AA	BB	AA	AA	AB	BB	AB	AA	AB	AA	AA	AA	AB	BB	AB	AB	AA	AB	AA	AA	AB	AA	AA	AA	AB	BB	BB	AA		AB	AA	AA	AB	AA	AA	AB	AB	AA	AA	AB
1340	AX-89807582	BB	AB	AB	AB	AA	BB	AB	AB	AA	BB	AA	AA	AB	BB	AB	AA	AB	AA	AA	AA	AB	BB	AB	AB	AA	AB	AA	AA	AB	NC	AA	AA	AB	BB	BB	AA		AB	AA	AA	AB	AA	AA	AB	AB	AA	AA	AB
1341	AX-89830890	BB	AA	AA	BB	AA	AA	AB	BB	AA	BB	AA	AA	AB	NC	AA	AA	AB	AA	AA	AA	AA	AB	AA	AA	AA	AA	AA	AA	AA	AA	AA	AA	AA	BB	NC	AA		NC	AA	AA	NC	AA	AA	NC	NC	AA	AA	NC
1342	AX-89790348	AB	AB	AB	AB	AA	AA	AB	BB	AA	AA	AA	AA	AB	NC	AB	AA	AB	AA	AA	AA	AB	AB	AB	AB	AA	AB	AA	AA	AB	AA	AA	AA	AB	AB	BB	AA		AB	AA	AA	AB	AA	AA	AB	AB	AA	AA	AB
1343	AX-89807584	BB	AB	AB	BB	AA	BB	AB	BB	AA	BB	AA	AA	AB	BB	AB	AA	AB	AA	AA	AA	AB	BB	AB	AB	AA	AB	AA	AA	AB	AA	AA	AA	AB	BB	BB	AA		AB	AA	AA	AB	AA	AA	AB	AB	AA	AA	AB
1344	AX-89790369	AB	AB	AB	AA	AA	AB	AB	AA	AA	AA	AA	AA	AB	NC	AB	AA	AB	AA	AA	AA	AB	BB	AB	AB	AA	AB	AA	AA	AB	AA	AA	AA	AB	AA	AA	AA		AB	AA	AA	AB	AA	AA	AB	AB	AA	AA	AB
1345	AX-89790375	AB	BB	AB	BB	AA	BB	AA	AB	AB	AA	AA	AB	AB	NC	AB	AB	AA	AB	AB	AB	BB	BB	BB	BB	AB	BB	AB	AB	AB	AB	AA	AB	AB	AB	AA	AB		AB	AA	AA	AB	AA	AA	AB	AB	AA	AA	AB
1346	AX-89807589	BB	AB	AB	BB	AA	BB	AB	BB	AA	BB	AA	AA	AB	BB	AB	AA	AB	AA	AA	AA	AB	BB	AB	AB	AA	AB	AA	AA	AB	AA	AA	AA	AB	BB	BB	AA		AB	AA	AA	AB	AA	AA	AB	AB	AA	AA	AB
1347	AX-89830918	BB	AB	AB	AB	AA	BB	AB	AB	AA	BB	AA	AA	AB	BB	AB	AA	AB	AA	AA	AA	AB	NC	AB	AB	AA	AB	AA	AA	AB	AA	AA	AA	AB	AB	BB	AA		AB	AA	AA	AB	AA	AA	AB	AB	AA	AA	AB
1348	AX-89790405	AA	AB	AB	AA	BB	AA	AB	AA	BB	AA	BB	BB	AA	AA	AB	BB	AB	BB	BB	BB	AB	AB	AB	AB	BB	AB	AB	BB	AB	NC	BB	BB	AB	AA	AA	BB		AB	BB	BB	AB	BB	BB	AB	AB	BB	BB	AB
1349	AX-89830942	AB	AB	AB	AB	AA	AB	AB	AA	AA	AB	AA	AB	AB	NC	AB	AB	AB	AA	AB	AB	AB	BB	BB	BB	AA	BB	AB	AA	AB	BB	AA	AA	AB	AB	AB	AA		BB	AA	BB	AB	AA	AA	BB	AB	AB	NC	AB
1350	AX-89830947	AA	AB	AB	AA	BB	AA	AB	AA	BB	AA	BB	AB	AA	NC	AB	AB	AB	BB	AB	AB	AB	AA	AA	AA	BB	AA	AB	BB	AB	AA	BB	BB	AB	AA	AA	BB		AA	BB	AA	AB	BB	BB	AA	AB	AB	BB	AB
1351	AX-89888130	BB	AB	AB	BB	AA	BB	AB	BB	AA	BB	AA	AB	BB	BB	AB	AA	AB	NC	AB	AB	AB	BB	BB	BB	AA	BB	AB	AA	AB	BB	AA	NC	AB	BB	BB	AA		BB	AA	BB	AB	AA	AA	BB	AB	AB	AA	AB
1352	AX-89790420	AB	AB	AB	AA	AA	AA	AB	AB	AA	NC	AA	AA	AB	NC	AB	AA	AB	AA	AA	AA	AB	BB	AB	AB	AA	AB	AA	AA	AB	AA	AA	AA	AB	AB	AB	AA		AB	AA	AA	AB	AA	AA	AB	AB	AA	AA	AB
1353	AX-89830976	BB	AB	AB	AB	AA	AB	AB	BB	AA	BB	AA	AB	BB	NC	AB	AB	AB	AA	AB	AB	AB	BB	BB	BB	AA	BB	AB	AA	AB	BB	AA	AA	AB	AB	BB	AA		BB	AA	BB	AB	AA	AA	BB	AB	AB	AA	AB
1354	AX-89790443	AB	AB	AB	BB	BB	BB	AB	AB	BB	AA	BB	BB	AB	AB	AB	BB	AB	BB	BB	BB	AB	AA	AB	AB	BB	AB	BB	BB	AB	BB	BB	BB	AB	AB	AB	BB		AB	BB	BB	AB	BB	BB	AB	AB	BB	BB	AB
1355	AX-89807595	AB	AB	NC	AB	AA	AA	AB	AB	AA	AB	AA	AA	AB	AA	NC	AA	AB	AA	AA	AA	AB	BB	AA	AA	AA	AA	AA	AA	NC	AA	AA	AA	AB	BB	AB	AA		AB	AA	AA	AB	AA	AA	AB	AB	AA	AA	AB
1356	AX-89790455	AB	BB	BB	AB	BB	AB	BB	AB	BB	AA	BB	AB	BB	BB	BB	BB	BB	BB	AB	AB	BB	BB	AB	AB	BB	AB	AB	BB	BB	AB	BB	BB	BB	AA	AB	BB		AB	BB	NC	BB	BB	BB	AB	BB	AB	BB	BB
1357	AX-89848587	AA	AA	AA	AA	AA	AA	NC	AA	AA	AA	AA	AB	AA	NC	AA	AA	AA	AA	AB	AB	AA	AA	AB	AB	AA	AB	AB	AA	AA	AB	AA	AA	AA	AA	AA	AA		AB	AA	NC	AA	AA	AA	AB	AA	AB	AA	AA
1358	AX-89848594	AA	AA	AA	AA	AA	AA	AB	AA	AA	AA	AA	AB	AB	NC	AA	AB	AA	AA	AB	AB	AB	AA	AB	AB	AA	AB	AB	AA	AA	BB	AA	AA	AA	AA	AA	AA		AB	AA	NC	AA	AA	AA	AB	AA	AB	AA	AA
1359	AX-89863700	BB	BB	BB	AB	BB	AB	AB	AB	BB	AB	BB	AB	AB	BB	BB	AB	BB	BB	AB	AB	AB	BB	AB	AB	BB	AB	AB	BB	BB	AA	BB	BB	BB	BB	BB	BB		AB	BB	NC	BB	BB	BB	AB	BB	AB	BB	BB
1360	AX-89831073	BB	BB	NC	BB	BB	AB	AB	AB	BB	AB	BB	AB	BB	AB	BB	BB	BB	BB	AB	AB	AB	BB	AB	AB	BB	AB	AB	BB	BB	AB	BB	BB	BB	BB	BB	BB		AB	BB	AB	BB	BB	BB	AB	BB	AB	BB	BB
1361	AX-89790518	AB	AA	AA	AA	AA	BB	AB	AB	AA	AA	AA	AB	AA	NC	AA	AA	AA	AA	AB	AB	AB	AA	AB	AB	AA	AB	AB	AA	AA	AB	AA	AA	AA	AB	AA	AA		AB	AA	NC	AA	AA	AA	AB	AA	AB	AA	AA
1362	AX-89831080	BB	BB	BB	BB	BB	BB	AB	BB	BB	BB	BB	AB	BB	BB	BB	BB	BB	AB	AA	AA	AB	BB	AA	AA	NC	AA	AA	AB	BB	NC	BB	AB	BB	AB	AB	BB		AB	BB	AB	BB	BB	BB	AB	BB	AB	BB	BB
1363	AX-89790523	AB	BB	BB	AB	BB	AB	AB	AB	BB	AA	BB	AB	AB	AB	BB	AB	BB	BB	AB	AB	BB	BB	AB	AB	BB	AB	AB	BB	BB	AA	BB	BB	BB	BB	AB	BB		AB	BB	NC	BB	BB	BB	AB	BB	AB	BB	BB
1364	AX-89790529	AA	BB	BB	AA	BB	AB	AA	AA	BB	AA	BB	AB	AB	NC	BB	AB	AA	BB	AB	AB	AB	BB	AB	AB	BB	AB	AB	BB	BB	AA	AA	BB	BB	AA	AA	BB		AB	BB	NC	BB	BB	BB	AB	BB	AB	BB	BB
1365	AX-89790543	BB	AA	AA	AB	AA	BB	AB	AB	AA	BB	AA	AB	AB	NC	AA	AB	AA	AA	AB	AB	AB	AA	AB	AB	AA	AB	AB	AA	AA	BB	AA	AA	AA	AB	AB	AA		AB	AA	NC	AA	AA	AA	AB	AA	AB	AA	AA
1366	AX-89831114	AB	BB	BB	AB	BB	AB	AB	BB	BB	BB	BB	AB	AB	AB	BB	AB	BB	BB	AB	AB	AB	BB	AB	BB	BB	AB	AB	BB	BB	AA	BB	BB	BB	BB	BB	BB		AB	BB	NC	BB	BB	BB	AB	BB	AB	BB	BB
1367	AX-89790560	BB	BB	BB	BB	NC	BB	BB	AB	BB	BB	BB	AB	BB	NC	BB	BB	BB	BB	AB	AB	AB	BB	AB	AB	BB	AB	AB	BB	BB	AB	BB	BB	BB	BB	BB	BB		AB	BB	NC	BB	BB	BB	AB	BB	AB	BB	BB
1368	AX-89790569	AB	AA	AA	AB	AA	AB	AB	AB	AA	AB	AA	AB	AA	BB	AA	AA	AA	AA	AB	AB	AB	AA	AB	AB	AA	AB	AB	AA	AA	AB	AA	AA	AA	BB	AB	AA		AB	AA	NC	AA	AA	AA	AB	AA	AB	AA	AA
1369	AX-89888325	AB	BB	BB	BB	BB	AB	AB	AB	BB	BB	BB	AB	BB	AB	BB	BB	BB	BB	AB	AB	AB	BB	AB	AB	AB	AB	AB	BB	BB	AB	BB	BB	BB	AB	BB	BB		AB	BB	NC	BB	BB	BB	AB	BB	AB	BB	BB
1370	AX-89790590	AA	BB	AB	AA	AB	AA	BB	AB	BB	AA	AB	AB	BB	NC	AB	BB	BB	BB	AB	AB	AB	BB	AB	AB	AB	AB	AB	BB	AB	AB	BB	NC	AB	AA	AA	BB		AB	BB	AA	BB	BB	BB	AB	BB	AB	BB	BB
1371	AX-89804607	BB	AB	AA	BB	AA	BB	BB	BB	AA	BB	AA	AA	NC	BB	AA	AA	AB	AA	NC	AA	BB	AB	AA	NC	NC	AA	AB	AA	AA	AA	AB	AA	AA	BB	BB	AA		NC	AA	NC	AA	AA	AA	NC	AA	NC	AA	AA
1372	AX-89790699	AB	AA	AA	AB	AA	AA	AA	AA	AA	BB	AA	AA	AA	AA	AA	AA	AA	AA	AA	AA	AA	AA	AA	AA	AA	AA	AA	AA	AA	NC	AA	AA	AA	AB	AA	AA		AA	AA	AA	AA	AA	AA	AA	AA	AA	AA	AA
1373	AX-89831335	AA	AA	AA	AA	AA	AA	AA	AA	AA	AA	AA	AA	AA	AA	AA	AA	AA	AA	AA	AA	AA	AA	AA	AA	AA	AA	AA	AA	AA	NC	AA	AA	AA	AA	AB	AA		AA	AA	AA	AA	AA	AA	AA	AA	AA	AA	AA
1374	AX-89831343	AA	AA	AA	AA	AA	BB	AA	AA	AA	AA	AA	AA	AA	AB	AA	AA	AA	AA	AA	AA	AA	AA	AA	AA	AA	AA	AA	AA	AA	NC	AA	AA	AA	AA	AB	AA		AA	AA	AA	AA	AA	AA	AA	AA	AA	AA	AA
1375	AX-89848365	BB	AA	AA	AA	AA	BB	AA	AA	AA	AB	AA	AA	AA	AB	AA	AA	AA	AA	AA	AA	AA	AA	AA	AA	AA	AA	AA	AA	AA	NC	AA	AA	AA	BB	BB	AA		AA	AA	AA	AA	AA	AA	AA	AA	AA	AA	AA
1376	AX-89807425	BB	AA	AA	BB	AA	BB	AA	BB	AB	BB	AA	AB	AA	BB	AB	AA	AA	AA	AA	AB	AA	AA	AA	AA	AA	AB	AA	AA	AB	NC	AB	AA	AB	BB	AB	AB		AA	AB	AA	AA	AB	AA	AB	AB	AA	AB	AB
1377	AX-89788770	BB	BB	BB	AB	BB	AB	BB	AB	AB	AB	BB	AB	BB	NC	AB	BB	BB	BB	BB	AB	BB	BB	BB	BB	BB	AB	BB	BB	AB	BB	AB	BB	AB	BB	AB	AB		BB	AB	BB	BB	AB	BB	AB	AB	BB	AB	AB
1378	AX-89848357	AB	BB	BB	AB	BB	BB	BB	BB	NC	AB	AB	AA	BB	BB	NC	BB	BB	BB	AB	AA	BB	BB	AB	AB	AB	NC	AB	BB	BB	AB	BB	AB	AA	BB	AB	AB		AB	AB	NC	AB	AB	AB	AB	AB	AB	AB	AB
1379	AX-89905130	BB	BB	BB	BB	BB	BB	BB	BB	BB	BB	BB	BB	BB	BB	BB	BB	BB	BB	BB	BB	BB	BB	BB	BB	BB	BB	BB	BB	BB	NC	BB	BB	BB	NC	NC	BB		BB	BB	BB	BB	BB	BB	BB	BB	BB	BB	BB
1380	AX-89788691	BB	AA	AA	AB	AB	AB	NC	AB	AB	AB	AB	BB	AA	NC	AB	AA	AA	AB	AB	BB	AA	AA	AB	AB	AB	AB	AB	AA	AB	AB	AB	AB	BB	BB	AB	AB		AB	AB	NC	AB	AB	AB	AB	AB	AB	AB	AB
1381	AX-89829093	BB	BB	BB	BB	BB	BB	BB	AB	BB	BB	BB	BB	BB	BB	BB	BB	BB	BB	BB	BB	BB	BB	BB	BB	BB	BB	BB	BB	BB	NC	BB	BB	BB	BB	BB	BB		BB	BB	BB	BB	BB	BB	BB	BB	BB	BB	BB
1382	AX-89788634	BB	AA	AA	AB	AB	BB	AB	BB	AB	BB	AA	AB	AA	NC	AB	AA	AA	AB	AA	NC	AA	AA	AA	AA	AA	AB	AA	AA	AB	AA	AB	AA	AB	BB	BB	AB		AA	AB	AA	AA	AB	AA	AB	AB	AA	AB	AB
1383	AX-89886191	AA	BB	BB	AA	BB	AA	BB	AA	BB	AA	BB	BB	BB	AA	BB	BB	BB	BB	BB	BB	BB	BB	BB	BB	BB	BB	BB	BB	BB	NC	BB	BB	BB	AB	AB	BB		BB	BB	BB	BB	BB	BB	BB	BB	BB	BB	BB
1384	AX-89829010	AB	BB	BB	AB	BB	AB	BB	BB	AB	AB	BB	AB	BB	AB	AB	BB	BB	BB	BB	AB	BB	BB	BB	BB	BB	AB	BB	BB	AB	NC	AB	BB	AB	AB	AB	AB		BB	AB	BB	BB	AB	BB	AB	AB	BB	AB	AB
1385	AX-89788604	AB	AA	AA	AA	AA	AA	AA	AA	AA	AB	AA	AA	AA	AB	AA	AA	AA	AA	AA	AA	AA	AA	AA	AA	AA	AA	AA	AA	AA	NC	AA	AA	AA	AA	AA	AA		AA	AA	AA	AA	AA	AA	AA	AA	AA	AA	AA
1386	AX-89788600	AB	AA	AA	BB	AA	AB	AA	BB	AA	BB	AA	AA	AA	AB	AA	AA	AA	AA	AA	AA	AA	AA	AA	AA	AA	AA	AA	AA	AA	NC	AA	AA	AA	BB	BB	AA		AA	AA	AA	AA	AA	AA	AA	AA	AA	AA	AA
1387	AX-89790830	NC	BB	AA	AB	NC	AA	AB	NC	AB	AA	AB	AA	BB	NC	AB	BB	AB	AA	AB	AB	AB	AB	AB	AB	AB	AB	AA	AB	AA	AB	AA	BB	AA	AA	AA	AB		AA	AA	NC	AA	AA	AA	AA	AA	AA	AA	AA
1388	AX-89810097	BB	BB	AA	AB	AA	AB	AB	BB	AB	AB	AA	NC	BB	BB	AA	BB	AB	AA	AB	AB	AB	AB	AB	NC	AB	AB	AA	AB	AA	NC	AA	BB	AA	NC	AB	AB		AA	AA	AA	AA	AA	AA	AA	AA	AA	AA	AA
1389	AX-89829948	BB	BB	AA	BB	AA	BB	AB	BB	AB	BB	AB	AA	BB	NC	AB	BB	AB	AA	AB	AB	AB	AB	AB	AB	AB	AB	AB	AB	AA	AB	AA	BB	AA	BB	BB	AB		AA	AA	NC	NC	AA	AA	AA	AA	AA	AA	AA
1390	AX-89789489	BB	BB	AA	AB	AA	AB	AB	AA	AB	BB	AA	AA	BB	BB	AA	BB	AB	NC	AB	AB	AB	AB	AB	BB	AB	AB	AA	AB	AA	AB	AA	BB	AA	AA	AB	AB		AA	AA	NC	AA	AA	AA	AA	AA	AA	AA	AA
1391	AX-89791489	BB	BB	AB	AB	AA	BB	AA	BB	BB	BB	BB	AB	BB	BB	BB	BB	AA	AB	BB	BB	BB	BB	BB	BB	BB	BB	AB	BB	AB	BB	AA	BB	AB	BB	BB	BB		AA	AA	AB	AA	AA	AA	AA	AA	AA	AA	AA
1392	AX-89789492	AA	BB	AA	AA	AA	AA	AB	AA	AB	AA	AB	AA	BB	AA	AB	BB	AB	AA	AB	AB	AB	AB	AB	AB	AB	AB	AA	AB	AA	AB	AA	BB	AA	AA	AA	AB		AA	AA	NC	AA	AA	AA	AA	AA	AA	AA	AA
1393	AX-89791083	AA	AA	BB	AB	BB	AA	AB	AA	AB	AA	AB	BB	AB	AB	AB	AB	AB	BB	AB	AB	AB	AB	AB	AB	AB	BB	BB	AB	BB	AB	BB	AB	BB	AA	AA	AB		BB	BB	NC	BB	BB	BB	BB	BB	BB	BB	BB
1394	AX-89829990	BB	AA	BB	BB	NC	BB	AB	AB	AB	BB	AB	BB	AA	AB	AB	AA	AB	BB	AB	AB	AB	AB	AB	AB	AB	AB	BB	AB	BB	AB	BB	AA	BB	BB	BB	AB		BB	BB	NC	BB	BB	BB	BB	BB	BB	BB	BB
1395	AX-89829924	AA	NC	BB	AA	BB	AA	AB	AB	AB	AA	AB	BB	AB	AA	AB	AB	AB	BB	AB	AB	AB	AB	AB	AB	AB	BB	BB	AB	BB	AB	BB	AB	BB	AA	AA	AB		BB	BB	NC	BB	BB	BB	BB	BB	BB	BB	BB
1396	AX-89829192	AB	BB	AA	AA	AA	AA	AA	AB	BB	AA	AB	AB	BB	AA	AB	BB	AA	AB	BB	BB	AB	AB	BB	BB	BB	AB	AB	BB	AA	BB	AA	BB	AA	AA	AB	BB		AA	AA	AB	AA	AA	AA	AA	AA	AA	AA	AA
1397	AX-89789493	BB	AA	BB	BB	BB	BB	AB	BB	AA	BB	AB	AB	AA	BB	AB	AA	AB	NC	AA	AA	AB	AB	AA	AA	AA	AA	AB	AA	BB	AA	BB	AA	BB	BB	BB	AA		BB	BB	AB	BB	BB	BB	BB	BB	BB	NC	BB
1398	AX-89885942	BB	BB	AA	AB	AA	AB	AB	AB	AB	AB	AB	AA	BB	AB	AB	BB	AB	AA	AB	AB	AB	AB	AB	AB	AB	AB	AA	AB	AA	AB	AA	BB	AA	BB	AB	AB		AA	AA	NC	AA	AA	AA	AA	AA	AA	NC	AA
1399	AX-89790024	BB	BB	AA	BB	AA	BB	NC	AB	AB	BB	AB	AA	BB	BB	AB	AB	NC	AA	AB	AB	AB	AB	AB	AB	AB	AA	AA	AB	AA	AB	AB	AB	AA	BB	BB	AB		AA	AA	NC	AA	AA	AA	AA	AA	AA	AA	AA
1400	AX-89828553	BB	AA	BB	BB	BB	BB	AB	BB	AB	BB	AB	BB	AB	BB	AB	AB	AB	BB	AB	AB	AB	AB	AB	AB	AB	BB	BB	AB	BB	AB	BB	AB	BB	BB	BB	AB		BB	BB	NC	BB	BB	BB	BB	BB	BB	BB	BB
1401	AX-89789967	BB	AA	BB	BB	NC	BB	AB	BB	AB	BB	AB	BB	AA	BB	AB	AA	AB	NC	AB	AB	AB	AB	AB	AB	AB	AB	AB	AB	BB	AB	BB	AA	BB	BB	BB	AB		BB	BB	NC	BB	BB	BB	BB	BB	BB	BB	BB
1402	AX-89789938	BB	BB	AA	AB	AA	AB	AB	AB	AB	BB	AB	AA	AB	BB	AB	AB	AB	AA	AB	AB	AB	AB	AB	AB	AB	NC	AA	AB	AA	AB	AA	AB	AA	BB	BB	AB		AA	AA	NC	AA	AA	AA	AA	AA	AA	AA	AA
1403	AX-89831581	BB	AA	BB	BB	BB	BB	AB	BB	AB	BB	AB	BB	AA	NC	AB	AA	AB	BB	AB	AB	AB	AB	AB	AB	AB	AB	BB	AB	BB	AB	BB	AA	BB	BB	BB	AB		BB	BB	NC	BB	BB	BB	BB	BB	BB	BB	BB
1404	AX-89831438	AA	BB	AA	AB	AA	AA	AB	AB	AB	BB	AB	AA	AB	BB	AB	AB	AB	AA	AB	AB	AB	AB	AB	AB	AB	AA	AA	AB	AA	AB	AA	AB	AA	AB	AB	AB		AA	AA	NC	AA	AA	AA	AA	AA	AA	AA	AA
1405	AX-89790866	BB	BB	AA	BB	AA	BB	AB	AB	AB	BB	AB	AA	AB	NC	AB	AB	AB	AA	AB	AB	AB	AB	AB	AB	AB	AA	AA	AB	AA	AB	AA	AB	AA	BB	BB	AB		AA	AA	NC	AA	AA	AA	AA	AA	AA	AA	AA
1406	AX-89831449	BB	AA	BB	AB	BB	BB	AA	AB	AB	AA	AB	BB	AA	AA	AB	AB	AA	BB	AB	AB	AB	AB	AB	AB	AB	BB	BB	AB	BB	AB	AB	AB	BB	AB	AB	AB		BB	BB	NC	BB	BB	BB	BB	BB	BB	BB	BB
1407	AX-89831453	AA	AA	BB	AB	BB	AA	AB	AB	AB	BB	AB	BB	NC	BB	AB	AB	AB	BB	AB	AB	AB	AB	AB	AB	AB	BB	BB	AB	BB	AB	BB	AB	BB	AB	AB	AB		BB	BB	NC	BB	BB	BB	BB	BB	BB	BB	BB
1408	AX-89831498	AA	BB	AB	AB	AA	AA	AB	AB	BB	BB	AB	AA	BB	BB	AB	BB	AB	AA	AB	AB	AB	AB	AB	AB	AB	AB	AA	AB	AA	AB	AA	BB	AA	AB	AB	AB		AB	AB	AB	AB	AA	AB	AB	AB	AA	AB	AB
1409	AX-89831469	AA	BB	AB	AB	AA	AA	AB	AB	BB	BB	AB	AA	BB	BB	AB	BB	AB	AA	AB	AB	AB	AB	AB	AB	AB	AB	AA	AB	AA	AB	AA	BB	AB	AB	AB	AB		AB	AB	AB	AB	AA	AB	AB	AB	AA	AB	AB
1410	AX-89790881	BB	AA	BB	BB	BB	BB	AB	BB	AB	BB	AB	BB	AB	AB	AB	NC	AB	BB	AB	AB	AB	AB	AB	AB	AB	BB	BB	AB	BB	AB	BB	AB	BB	BB	BB	AB		BB	BB	NC	BB	BB	BB	BB	BB	BB	NC	BB
1411	AX-89790952	BB	AA	AB	AB	AB	AB	AB	AB	AA	AB	AB	BB	AA	BB	AB	AA	AB	BB	AB	AB	AB	AB	AB	AB	AB	AB	BB	AB	BB	AB	BB	AA	BB	BB	AB	AB		AB	AB	AB	AB	BB	AB	AB	AB	BB	AB	AB
1412	AX-89831505	AB	AA	BB	AB	BB	AA	AB	AB	AB	AB	AB	BB	AB	AA	AB	AB	AB	BB	AB	AB	AB	AB	AB	AB	AB	BB	BB	AB	BB	AB	BB	AB	BB	AB	AB	AB		BB	BB	NC	BB	BB	BB	BB	BB	BB	BB	BB
1413	AX-89832126	AA	BB	AA	AB	AB	AB	BB	AB	AB	AA	BB	BB	AB	AB	BB	AB	AB	AA	AB	AB	AB	AB	BB	AA	BB	AA	BB	BB	AB	AB	BB	AB	AB	AA	AA	BB		AB	AB	NC	AB	AB	AB	AB	AB	AB	AB	AB
1414	AX-89790981	AB	NC	AA	BB	AB	BB	BB	AB	AB	BB	BB	BB	AB	AB	BB	AB	AB	AB	BB	BB	AB	NC	BB	BB	BB	AB	BB	BB	AB	BB	BB	AB	AB	AB	BB	BB		AB	AB	NC	AB	AB	AB	AB	AB	AB	AB	AB
1415	AX-89831507	BB	BB	AA	AB	AA	BB	AB	AA	AB	AA	AB	AA	AB	AA	AB	AB	AB	NC	AB	AB	AB	AB	AB	AB	AB	AA	AA	AB	AA	AB	AA	AB	AA	AB	AB	AB		AA	AA	NC	AA	AA	AA	AA	AA	AA	AA	AA
1416	AX-89790184	BB	AB	BB	BB	AB	BB	AA	AB	NC	BB	AB	AA	AB	BB	AB	NC	AB	BB	AB	NC	AB	AB	NC	AA	NC	NC	AB	AA	AB	AB	AA	NC	AB	BB	BB	AA		AB	AB	NC	AB	AB	AB	AB	AB	AB	AB	AB
1417	AX-89790988	AA	AA	BB	AA	BB	AA	AB	AA	AB	AA	AB	BB	AB	AA	AB	AB	AB	BB	AB	AB	AB	AB	AB	AB	AB	BB	BB	AB	BB	AB	BB	AB	BB	AA	AA	AB		BB	BB	NC	BB	BB	BB	BB	BB	BB	BB	BB
1418	AX-89861545	AB	BB	AA	AB	AB	AB	BB	AB	AB	AB	BB	BB	AB	AB	BB	AB	AB	AB	BB	BB	AB	AB	BB	BB	BB	AB	BB	BB	AA	BB	BB	AB	AA	AB	AB	BB		AB	AB	NC	AB	AB	AB	AB	AB	AB	AB	AB
1419	AX-89807637	BB	BB	AA	BB	AA	BB	AB	BB	AB	BB	AB	AA	AB	BB	AB	AB	AB	AA	AB	AB	AB	AB	AB	AB	AB	AA	AA	AB	AA	AB	AA	AB	AA	BB	BB	AB		AA	AA	NC	AA	AA	AA	AA	AA	AA	AA	AA
1420	AX-89831504	AB	BB	AA	AB	AA	BB	AB	AB	BB	AA	AB	AB	NC	BB	NC	BB	AB	AB	BB	BB	AB	AB	BB	BB	BB	AB	AB	AB	AA	BB	AA	BB	AA	AB	BB	BB		AA	AA	AB	AA	AA	AA	AA	AA	AA	AA	AA
1421	AX-89905360	AB	AB	BB	AB	AB	BB	AB	BB	AB	BB	AA	AA	AB	AB	AA	AB	AB	AB	AA	AA	AB	AB	AA	AA	AA	AB	AA	AA	AB	AA	AA	AB	AB	AB	AB	AA		AB	AB	NC	AB	AB	AB	AB	AB	AB	AB	AB
1422	AX-89791186	AA	AB	AA	AB	AB	AB	AB	AB	AB	AB	BB	BB	AB	AA	BB	AB	AB	AB	BB	BB	AB	AB	BB	BB	BB	AB	BB	BB	AB	BB	BB	AB	AB	AA	AB	BB		AB	AB	NC	AB	AB	AB	AB	AB	AB	AB	AB
1423	AX-89831663	AB	BB	BB	BB	AB	BB	BB	AB	AB	AB	BB	BB	AB	BB	AB	AB	BB	AB	AB	AB	BB	BB	AB	BB	BB	AB	BB	AB	BB	NC	BB	AB	BB	AB	BB	BB		BB	BB	BB	BB	BB	BB	BB	BB	BB	BB	BB
1424	AX-89831664	AB	BB	BB	BB	AB	AB	BB	BB	AB	BB	BB	BB	AB	AA	AB	AB	BB	NC	BB	BB	BB	BB	AB	AB	BB	BB	BB	AB	BB	NC	BB	AB	AB	AB	BB	BB		BB	BB	BB	BB	BB	BB	BB	BB	BB	BB	BB
1425	AX-89831657	BB	AA	NC	AB	AB	BB	AB	AB	AB	AA	AB	BB	AB	AA	BB	AB	AA	AB	AB	BB	AB	AA	BB	AB	AB	AB	BB	BB	AB	BB	BB	AB	AB	BB	AB	AB		AB	AB	AB	AB	AB	AB	AB	AB	AB	AB	AB
1426	AX-89828540	AB	BB	BB	BB	AB	AB	AB	BB	AB	BB	AB	AA	AB	NC	AA	AB	BB	BB	BB	AB	BB	BB	AB	AB	AB	BB	AA	AA	AB	AB	AA	AB	AB	AB	BB	AB		AB	AB	AB	AB	AB	AB	AB	AB	AB	AB	AB
1427	AX-89788160	AA	AA	AA	AA	AB	AA	AB	AB	AB	AA	AB	BB	AB	AB	BB	AB	AA	AB	AB	BB	AA	AA	BB	AB	AB	AB	BB	BB	AB	BB	BB	AB	AB	AA	AA	AB		AB	AB	AB	AB	AB	AB	AB	AB	AB	AB	AB
1428	AX-89788172	AA	BB	BB	AA	AB	AA	AB	AB	AB	AA	AB	AA	AB	AB	AA	AB	BB	AB	AB	AA	BB	BB	AA	AB	AB	AB	AA	AA	AB	AA	AA	AB	AB	AB	AB	AB		AB	AB	AB	AB	AB	AB	AB	AB	AB	AB	AB
1429	AX-89828555	BB	BB	BB	AB	AB	AB	AB	AB	AB	AB	AB	AA	AB	AB	AB	AB	BB	BB	BB	AB	BB	BB	AA	AB	AB	BB	AA	AA	AB	AB	NC	AB	AB	AB	NC	AB		AB	AB	AB	AB	AB	AB	AB	AB	AB	AB	AB
1430	AX-89848707	AA	BB	BB	AA	AB	AA	AB	AA	AB	AA	AB	AA	AB	NC	AA	AB	BB	BB	BB	AB	BB	BB	AA	AB	AB	BB	AA	AA	AB	AB	AA	AB	AB	AA	AA	AB		AB	AB	AB	AB	AB	AB	AB	AB	AB	AB	AB
1431	AX-89831967	AA	AA	AA	AB	AB	AB	AB	AB	AB	AA	AB	BB	AB	AB	AB	AB	AA	AB	AB	BB	AA	AA	BB	AB	AB	BB	BB	BB	AB	BB	BB	AB	AB	AA	AA	AB		AB	AB	AB	AB	AB	AB	AB	AB	AB	AB	AB
1432	AX-89852265	AA	BB	BB	AA	AB	BB	AB	BB	AB	AB	AB	AA	AB	BB	AB	AB	BB	AB	AB	AA	BB	BB	AB	AB	AB	AA	AA	AA	AB	AA	AA	AB	AB	BB	AB	AB		AB	AB	AB	AB	AB	AB	AB	AB	AB	AB	AB
1433	AX-89789234	BB	AA	AB	AB	AB	AB	AB	AB	AB	AB	BB	BB	AB	NC	BB	AB	AA	AB	AB	BB	AA	AA	AB	AB	AB	BB	BB	BB	BB	BB	BB	AB	BB	BB	AB	AB		AB	AB	AB	AB	AB	AB	AB	AB	AB	AB	AB
1434	AX-89829582	AB	AA	AA	BB	AB	AA	AB	BB	AB	BB	AB	BB	AB	NC	AB	AB	AA	AB	AB	BB	AA	AA	AB	AB	AB	BB	BB	BB	AB	BB	BB	AB	AB	AB	BB	AB		AB	AB	AB	AB	AB	AB	AB	AB	AB	AB	AB
1435	AX-89788914	BB	BB	AB	AB	AB	BB	AB	BB	AB	BB	BB	AB	AB	AB	AB	AB	AB	AA	AB	AA	AB	BB	BB	BB	BB	AA	AB	AB	AA	AA	AA	AB	AA	BB	BB	AB		BB	AA	AB	AB	AB	BB	BB	AB	AA	AB	BB
1436	AX-89788904	AA	AA	AB	AB	AA	AB	AA	AB	AA	AA	AA	AA	AA	AB	AA	AA	AB	AA	AA	AB	AB	AA	AA	AA	AA	AB	AA	AA	AB	NC	AA	AA	AB	AA	AB	AA		AA	AB	AA	AA	AB	AA	AA	AA	AB	AA	AA
1437	AX-89829367	BB	BB	BB	BB	AB	BB	AB	AB	AB	BB	BB	AB	AB	NC	AB	AB	BB	AA	AB	AB	BB	BB	BB	BB	BB	AB	AB	AB	AB	AB	AA	AB	AB	BB	BB	AB		BB	AB	AB	AB	BB	BB	BB	AB	AB	AB	BB
1438	AX-89788952	BB	BB	BB	AA	AB	BB	AB	AA	BB	AA	BB	AB	BB	AA	AB	AB	BB	AA	BB	AB	BB	BB	BB	BB	BB	AB	AB	AB	AB	BB	AA	AB	AB	AA	AA	AB		BB	AB	AB	AB	BB	BB	BB	AB	AB	AB	BB
1439	AX-89886523	BB	BB	AB	BB	AB	BB	AB	AB	AB	AB	BB	AB	AB	AB	AB	AB	AB	AA	AB	AA	AB	NC	BB	BB	AB	AA	AB	AB	AA	AA	AA	AB	AA	BB	AB	AB		BB	AA	AB	AB	AB	BB	BB	AB	AA	AB	BB
1440	AX-89788974	BB	BB	BB	BB	BB	BB	AB	AB	BB	BB	BB	AB	BB	AB	AB	AB	BB	AA	BB	AB	BB	BB	BB	BB	BB	AB	AB	AB	AB	BB	AA	AB	AB	AB	AB	AB		BB	AB	AB	AB	BB	BB	BB	AB	AB	AB	BB
1441	AX-89829438	BB	AA	AB	AB	AB	AB	AA	AA	AA	BB	AA	AA	AA	BB	AB	AA	AA	AA	AA	AA	AB	AB	AA	AA	AA	AA	AA	AA	AA	NC	AA	AB	AA	AA	AB	AA		AB	AA	AA	AB	AA	AB	AB	AB	AA	AB	AB
1442	AX-89848395	AB	BB	BB	AA	BB	AB	AB	AA	BB	AB	BB	AB	BB	AB	AB	AB	BB	AA	BB	AB	BB	BB	BB	BB	BB	AB	AB	AB	AB	BB	AA	AB	AB	AB	AB	AB		BB	AB	AB	AB	BB	BB	BB	AB	AB	AB	BB
1443	AX-89829757	AB	AA	AA	AB	AA	BB	AB	AB	AA	NC	AA	AB	AA	BB	AB	AB	AA	BB	AA	AB	AA	AA	AA	AA	AA	AB	AB	AB	AB	AA	BB	AB	AB	AB	BB	AB		AA	AB	AB	AB	AA	AA	AA	AB	AB	AB	AA
1444	AX-89829483	AA	AB	AB	AA	AB	AA	BB	AB	BB	AA	BB	BB	BB	NC	AB	AB	BB	BB	BB	BB	AB	AA	BB	BB	AB	BB	BB	BB	BB	BB	BB	AB	BB	AA	AA	BB		AB	BB	BB	AB	BB	AB	AB	AB	BB	AB	AB
1445	AX-89789306	AA	AA	AA	AA	AA	AA	AB	AA	AA	AA	AA	AB	AA	AA	BB	AB	AA	BB	AA	AB	AA	AA	AA	AA	AA	AB	AB	AB	BB	AA	NC	AB	BB	AA	AA	AB		AA	AB	AB	AB	AA	AA	AA	AB	AB	AB	AA
1446	AX-89872554	AA	AA	AB	BB	AB	AA	AA	AB	AA	BB	AA	AA	AA	AB	AB	AA	AA	AA	AA	AA	AB	AB	AA	AA	AA	AA	AA	AA	AA	NC	AA	AB	AA	AB	AB	AA		AB	AA	AA	AB	AA	AB	AB	AB	AA	AB	AB
1447	AX-89804466	AA	BB	BB	AA	BB	AA	AB	AA	BB	AA	BB	AB	BB	AA	AB	AB	BB	AB	BB	AB	BB	BB	BB	BB	BB	AB	AB	AB	AB	BB	AA	AB	AB	AA	AA	AB		BB	AB	AB	AB	BB	BB	BB	AB	AB	AB	BB
1448	AX-89829823	AA	BB	BB	AB	BB	AA	AB	AA	BB	AA	BB	AB	AB	AB	AB	AB	BB	AB	BB	AB	BB	BB	BB	BB	BB	AB	AB	AB	AB	BB	AA	AB	AB	AA	AB	AB		BB	AB	AB	AB	BB	BB	BB	AB	AB	AB	BB
1449	AX-89789467	AB	AB	AB	AA	AB	AB	AB	AA	AA	AA	AA	AB	AA	NC	BB	BB	AA	AB	AA	AB	AB	BB	AA	AA	NC	AB	AB	AB	AB	AA	BB	BB	AB	AA	AB	AB		AB	AB	AB	BB	AA	AB	BB	BB	AB	BB	AB
1450	AX-89829859	BB	AB	BB	BB	BB	BB	AB	AB	BB	BB	BB	AB	BB	AB	AA	AA	BB	AA	BB	AB	BB	AB	BB	BB	AB	AB	AB	AB	AB	NC	AB	AB	AB	BB	BB	AB		BB	AB	AB	NC	BB	BB	BB	AB	AB	AB	BB
1451	AX-89829864	BB	AA	AA	AB	AA	AB	AB	AB	AA	BB	AA	AB	AA	AB	BB	AB	AA	AB	AA	AB	AA	AA	AA	AA	AA	AB	AB	AB	AB	AA	BB	AB	AB	BB	AB	AB		AA	AB	AB	AB	AA	AA	AA	AB	AB	AB	AA
1452	AX-89868191	BB	BB	BB	AB	BB	BB	AB	AB	BB	AB	BB	AB	BB	AB	AA	AB	BB	AB	BB	AB	BB	BB	BB	BB	BB	AB	AB	AB	AB	BB	AA	AB	AB	BB	BB	AB		BB	AB	AB	AB	BB	BB	BB	AB	AB	AB	BB
1453	AX-89789486	AA	AB	AB	AA	AB	AA	AB	AB	BB	AA	BB	AB	BB	NC	AA	AA	BB	AB	BB	AB	AB	AA	BB	BB	AB	AB	AB	AB	AB	BB	AA	AA	AB	AA	AA	AB		AB	AB	AB	AA	BB	AB	AA	AA	AB	AA	AB
1454	AX-89789473	AA	AB	AB	AB	AB	AB	AB	AB	AA	AA	AA	AB	AA	BB	BB	BB	AA	AB	AA	AB	AB	BB	AA	AA	AB	AB	AB	AB	AB	NC	BB	BB	AB	BB	BB	AB		AB	AB	AB	BB	AA	AB	BB	BB	AB	BB	AB
1455	AX-89829953	BB	AB	AB	BB	AB	BB	NC	AB	NC	BB	AA	AB	NC	BB	BB	BB	AA	AB	AA	AB	AB	BB	AA	AA	AB	NC	AB	AB	AB	AA	BB	AB	AB	BB	BB	AB		AB	AB	AB	BB	AA	AB	BB	BB	AB	BB	AB
1456	AX-89829974	BB	AB	AB	BB	AB	BB	AB	AB	AB	BB	BB	AB	BB	NC	AA	AA	BB	AB	AB	AB	AB	AA	BB	BB	AB	AB	AB	AB	AB	AB	AA	AA	AB	BB	BB	AB		AB	AB	AB	AA	BB	AB	AA	AA	AB	AA	AB
1457	AX-89830024	AA	BB	BB	BB	BB	AA	AB	AB	BB	BB	BB	AB	BB	AB	AA	AB	BB	BB	BB	AB	BB	BB	BB	BB	BB	AB	AB	AB	AB	NC	AA	AB	AB	AB	AB	AB		BB	AB	AB	AB	BB	BB	AB	AB	AB	AB	BB
1458	AX-89830013	AA	AB	AB	AB	AB	AA	AB	AA	AB	AB	BB	AB	BB	NC	AA	AA	BB	AB	AB	AB	AB	AA	BB	BB	AB	AB	AB	AB	AB	AB	AA	AA	AB	AA	AB	AB		AB	AB	AB	AA	BB	AB	AA	AA	AB	AA	AB
1459	AX-89789559	AA	BB	AB	AB	NC	AB	AB	AB	AB	AB	BB	AB	BB	NC	AA	AB	BB	AB	AB	AB	AB	AB	BB	BB	BB	NC	AB	AB	AB	AB	NC	AA	AB	AA	AB	AB		AB	AB	AB	AA	BB	AB	AA	AA	AB	AA	AB
1460	AX-89789581	BB	AB	AB	BB	AB	BB	AA	BB	AB	BB	BB	AB	BB	BB	AA	AA	AA	AB	AB	AB	AB	AA	NC	BB	AB	AB	AB	AB	AB	AB	AA	AA	AB	BB	BB	AB		AB	AB	AB	AB	BB	BB	AB	AA	AB	AA	AB
1461	AX-89830078	AB	AB	BB	AA	BB	AA	AB	AB	BB	NC	BB	AB	BB	AA	AA	AB	BB	BB	BB	AB	BB	AB	BB	BB	AB	AB	AB	BB	AB	BB	AA	AB	AB	AA	AA	AB		BB	AB	AB	AB	BB	BB	AB	AB	AB	AB	BB
1462	AX-89830572	AB	BB	AB	BB	BB	AA	BB	BB	AB	BB	BB	BB	BB	NC	BB	BB	BB	AB	AB	BB	AB	AB	BB	BB	BB	BB	BB	BB	BB	AB	BB	BB	BB	AB	BB	BB		AB	BB	BB	AB	BB	AB	AB	AB	BB	AB	AB
1463	AX-89789628	BB	AB	BB	BB	BB	BB	AB	AA	BB	BB	BB	AB	BB	AB	AA	AB	BB	BB	BB	AB	BB	AB	BB	BB	AB	AB	AB	BB	AB	NC	AA	AB	AB	BB	BB	AB		BB	AB	AB	AB	BB	BB	AB	AB	AB	AB	BB
1464	AX-89861433	BB	BB	AB	BB	BB	BB	BB	AB	AB	BB	BB	BB	BB	BB	BB	BB	BB	NC	AB	BB	AB	AB	BB	BB	BB	BB	BB	BB	BB	AB	BB	BB	BB	BB	BB	BB		AB	BB	BB	AB	BB	AB	AB	AB	BB	AB	AB
1465	AX-89830536	AB	BB	AB	AA	BB	AA	BB	AB	AB	AA	BB	BB	BB	AA	BB	BB	BB	AB	AB	BB	AB	AB	BB	BB	BB	BB	BB	BB	BB	AB	BB	BB	BB	AA	AA	BB		AB	BB	BB	AB	BB	AB	NC	AB	BB	AB	AB
1466	AX-89789996	BB	AB	BB	AB	BB	AB	AB	AB	BB	AB	BB	AB	BB	BB	AA	AB	BB	BB	BB	AB	BB	AB	BB	BB	AB	AB	AB	BB	AB	BB	AA	AB	AB	BB	BB	AB		BB	AB	AB	AB	BB	BB	AB	AB	AB	AB	BB
1467	AX-89887670	AA	AB	AA	AA	AA	AA	AB	AB	AA	AA	AA	AB	AA	AA	BB	AB	AA	AA	AA	AB	AA	AB	AA	AA	AB	AB	AB	AA	AB	AA	NC	AB	AB	AA	AA	AB		AA	AB	AB	AB	AA	AA	AB	AB	AB	AB	AA
1468	AX-89830459	AA	BB	AB	AA	BB	AA	BB	AA	AB	AA	BB	BB	BB	NC	BB	BB	BB	AB	AB	BB	AB	AB	BB	BB	BB	BB	BB	BB	BB	AB	BB	BB	BB	AA	AA	BB		AB	BB	AB	AB	BB	AB	AB	AB	BB	AB	AB
1469	AX-89830473	AB	AB	AA	BB	AA	AB	AB	BB	AA	AB	AA	AB	AA	AA	AB	AB	AA	AA	AA	AB	AA	AB	AA	AA	AB	AB	AB	AA	AB	AA	NC	AB	AB	BB	AB	AB		AA	AB	AB	AB	AA	AA	AB	AB	AB	AB	AA
1470	AX-89830238	BB	AA	AA	AB	AB	AA	AA	AA	AB	AA	AA	AA	AB	AA	AA	AA	AA	AB	AB	AA	AA	AA	AA	AA	AA	AA	AA	AA	AA	NC	AA	AA	AA	AA	AA	AA		AA	AA	AA	AA	AA	AA	AA	AA	AA	AA	AA
1471	AX-89830296	BB	AA	AA	BB	AA	BB	AA	BB	AB	BB	AA	AA	AA	AB	AA	AA	AA	AB	AB	AA	AA	AA	AA	AA	AA	AA	AA	AA	AA	NC	AA	AA	AA	BB	BB	AA		AA	AA	AA	AA	AA	AA	AA	AA	AA	AA	AA
1472	AX-89789747	AA	BB	BB	AB	BB	AB	BB	AB	AB	AB	BB	BB	BB	NC	BB	BB	BB	AB	AB	BB	BB	BB	BB	BB	BB	BB	BB	BB	BB	AB	BB	BB	BB	AA	AB	BB		BB	BB	BB	BB	BB	BB	BB	BB	BB	BB	BB
1473	AX-89830309	AB	BB	BB	AB	BB	AA	BB	AB	AB	AB	BB	BB	BB	AA	BB	BB	BB	AB	NC	BB	BB	BB	BB	BB	BB	BB	BB	BB	BB	NC	BB	BB	BB	AA	AA	BB		BB	BB	BB	BB	BB	BB	BB	BB	BB	BB	BB
1474	AX-89861418	BB	BB	BB	BB	BB	BB	BB	BB	AB	BB	BB	NC	BB	AB	BB	BB	BB	AB	AB	BB	BB	BB	BB	BB	BB	BB	BB	BB	BB	NC	BB	BB	BB	BB	BB	BB		BB	BB	BB	BB	BB	BB	BB	BB	BB	BB	BB
1475	AX-89830341	AB	BB	BB	AB	AB	BB	BB	AB	NC	AB	BB	BB	BB	BB	BB	BB	BB	AB	BB	BB	BB	BB	BB	BB	BB	BB	BB	BB	BB	NC	BB	BB	BB	BB	BB	BB		BB	BB	BB	BB	BB	BB	BB	BB	BB	BB	BB
1476	AX-89807517	BB	AA	AA	AB	AB	AB	AA	AB	AB	BB	AA	AA	AA	AA	AA	AA	AA	AB	AB	AA	AA	AA	AA	AA	AA	AA	AA	AA	AA	NC	AA	AA	AA	AA	AA	AA		AA	AA	AA	AA	AA	AA	AA	AA	AA	AA	AA
1477	AX-89848548	BB	AB	BB	BB	BB	BB	BB	BB	BB	BB	BB	BB	BB	NC	BB	AB	BB	BB	BB	BB	BB	AB	BB	BB	BB	BB	BB	BB	BB	BB	BB	BB	BB	BB	BB	BB		BB	BB	BB	BB	BB	BB	BB	BB	BB	BB	BB
1478	AX-89905257	AA	AB	AA	AA	AA	BB	AA	AB	AA	AA	AA	AA	AA	AA	AA	AB	AA	AA	AA	AA	AA	AB	AA	AA	AA	AA	AA	AA	AA	AA	AA	AA	AA	AA	AA	AA		AA	AA	AA	AA	AA	AA	AA	AA	AA	AA	AA
1479	AX-89790216	AB	NC	BB	AA	BB	AA	BB	BB	BB	AB	BB	BB	BB	AA	BB	AB	BB	BB	BB	BB	BB	AB	BB	BB	BB	BB	BB	BB	BB	BB	BB	BB	BB	AB	BB	BB		BB	BB	BB	BB	BB	BB	BB	BB	BB	BB	BB
1480	AX-89830818	AB	BB	BB	AB	BB	AB	BB	AB	BB	AA	BB	BB	BB	AA	BB	BB	BB	BB	BB	BB	BB	BB	BB	AB	BB	BB	BB	BB	BB	NC	BB	BB	BB	BB	AB	BB		BB	BB	BB	BB	BB	BB	BB	BB	BB	BB	BB
1481	AX-89887988	BB	BB	BB	BB	BB	BB	BB	BB	AB	BB	BB	BB	BB	BB	AB	BB	BB	BB	AB	BB	BB	BB	BB	NC	BB	AB	BB	BB	BB	AB	AB	AB	BB	BB	BB	BB		BB	BB	BB	BB	BB	BB	BB	BB	BB	BB	BB
1482	AX-89830845	AA	BB	BB	AA	BB	AB	BB	AB	AB	AA	BB	BB	BB	AB	AB	BB	BB	BB	AB	BB	BB	BB	BB	BB	BB	AB	BB	BB	BB	AB	AB	AB	BB	AB	AB	BB		BB	BB	BB	BB	BB	BB	BB	BB	BB	BB	BB
1483	AX-89790336	BB	AB	AA	AB	AA	BB	AA	BB	AB	BB	AA	AA	AA	BB	AB	AB	AA	AA	AB	AA	AA	AB	AA	AA	AA	AB	AA	AA	AA	AB	AB	AB	AA	BB	BB	AA		AA	AA	AA	AA	AA	AA	AA	AA	AA	AA	AA
1484	AX-89830886	BB	AB	BB	BB	BB	BB	BB	AB	AB	BB	BB	BB	BB	NC	AB	AB	BB	BB	AB	BB	BB	AB	BB	BB	BB	AB	BB	BB	BB	AB	AB	AB	BB	BB	BB	BB		BB	BB	BB	BB	BB	BB	BB	BB	BB	BB	BB
1485	AX-89861463	BB	AB	AB	BB	AB	BB	BB	BB	AB	BB	AB	BB	BB	AB	AA	AB	BB	BB	AB	BB	BB	AB	BB	BB	BB	AB	BB	BB	AB	NC	AB	AB	AB	BB	BB	BB		BB	BB	BB	BB	BB	BB	BB	BB	BB	BB	BB
1486	AX-89804592	AA	AB	BB	AA	BB	AA	BB	AA	AB	AA	BB	BB	BB	AA	AB	AB	BB	BB	AB	BB	BB	BB	BB	BB	BB	AB	BB	BB	BB	AB	AB	NC	BB	AA	AA	BB		BB	BB	BB	BB	BB	BB	BB	BB	BB	BB	BB
1487	AX-89788696	AB	AA	AB	AB	AA	AA	AA	AB	AA	BB	AB	AA	AA	BB	AB	AA	AA	AA	AA	AA	AA	AA	AA	AA	AA	AA	AA	AA	AB	AA	AA	AA	AB	BB	AB	AA		AA	AA	AA	AA	AA	AA	AA	AA	AA	AA	AA
1488	AX-89790485	BB	AA	AA	BB	AA	AB	AA	BB	AB	BB	AA	AA	AA	NC	AB	AA	AA	AA	AB	AA	AA	AA	AA	AA	AA	AB	AA	AA	AA	AB	AB	AB	AA	BB	BB	AA		AA	AA	AA	AA	AA	AA	AA	AA	AA	AA	AA
1489	AX-89831040	AB	BB	BB	AB	BB	BB	BB	AB	AB	AA	BB	BB	BB	NC	AB	BB	BB	BB	AB	BB	BB	BB	BB	BB	BB	AB	BB	BB	BB	AB	AB	AB	BB	BB	AA	BB		BB	BB	BB	BB	BB	BB	BB	BB	BB	BB	BB
1490	AX-89888202	AB	BB	BB	BB	BB	BB	BB	BB	BB	BB	BB	BB	BB	AB	BB	BB	BB	BB	BB	BB	BB	BB	BB	BB	BB	BB	BB	BB	BB	NC	BB	BB	BB	BB	BB	BB		BB	BB	BB	BB	BB	BB	BB	BB	BB	BB	BB
1491	AX-89831293	AB	AB	AB	AB	BB	BB	BB	AB	BB	AA	BB	BB	BB	BB	BB	AB	BB	BB	BB	BB	AB	AB	BB	AB	AB	BB	BB	BB	AB	BB	BB	BB	BB	AA	AA	BB		BB	AB	AB	BB	AB	BB	BB	BB	AB	BB	BB
1492	AX-89886417	BB	AB	AB	AA	BB	BB	BB	AB	BB	AA	BB	BB	BB	AA	BB	NC	BB	AB	AB	AB	AB	AA	AB	NC	AA	AB	AB	AB	AB	NC	BB	AB	BB	AB	AB	AB		BB	AB	AB	BB	AB	BB	BB	BB	AB	BB	BB
1493	AX-89886319	BB	AB	AB	BB	BB	BB	BB	AB	BB	AB	BB	BB	BB	AB	BB	AB	BB	BB	BB	BB	AB	AA	BB	AB	AB	BB	BB	BB	AB	BB	BB	BB	BB	BB	AB	BB		BB	AB	AB	BB	AB	BB	BB	BB	AB	BB	BB
1494	AX-89831304	AB	AB	AB	AB	AA	BB	AA	AB	AA	AA	AA	AA	AA	BB	AA	AB	AA	AA	AA	AA	AB	BB	AA	AB	AB	AA	AA	AA	AB	AA	AA	AA	AA	AA	AA	AA		AA	AB	AB	AA	AB	AA	AA	AA	AB	AA	AA
1495	AX-89788753	AA	AB	AB	AB	AA	BB	AA	AA	AA	AA	AA	AA	AA	AB	AA	AB	AA	AA	AA	AA	AB	AB	AA	AB	AB	AA	AA	AA	AB	NC	AA	AA	AA	AA	AA	AA		AA	AB	AB	AA	AB	AA	AA	AA	AB	AA	AA
1496	AX-89861498	BB	AB	AB	AB	BB	AB	BB	BB	BB	AB	BB	BB	BB	AB	BB	AB	BB	BB	BB	BB	AB	AB	BB	AB	AB	BB	BB	BB	AB	NC	BB	BB	BB	AB	AB	BB		BB	AB	AB	BB	AB	BB	BB	BB	AB	BB	BB
1497	AX-89790682	AA	AA	AA	AA	AA	AA	AA	BB	AA	AA	AA	AA	AA	AA	AA	AA	AA	AA	AA	AA	AA	AA	AA	AA	AA	AA	AA	AA	AA	NC	AA	AA	AA	AA	AB	AA		AA	AA	AA	AA	AA	AA	AA	AA	AA	AA	AA
1498	AX-89831274	BB	AB	AB	AB	BB	AB	AB	AB	BB	BB	BB	AB	BB	AB	AA	AB	BB	BB	BB	AB	AB	AA	BB	AB	AB	BB	AB	BB	AA	AB	AA	BB	BB	BB	BB	AB		BB	AA	AB	AB	AB	BB	AB	AB	AA	AB	BB
1499	AX-89790715	AB	AB	AB	AB	BB	AB	AB	AA	BB	AA	BB	AB	BB	BB	NC	AB	BB	BB	BB	AB	AB	AA	BB	NC	AB	BB	AB	BB	AA	AB	AA	BB	BB	BB	AB	AB		BB	AA	AB	AB	AB	BB	AB	AB	AA	AB	BB
1500	AX-89831307	BB	BB	AB	AB	BB	BB	AA	BB	BB	AB	AB	AB	NC	AB	AB	BB	AA	BB	AB	AB	AB	BB	BB	BB	BB	BB	AB	AB	AB	NC	AA	BB	BB	BB	AB	AB		AA	AA	AB	AA	AB	AA	AA	AA	AA	AA	AA
1501	AX-89888498	AA	BB	AB	BB	BB	AB	AA	AB	BB	AA	AB	AB	BB	BB	AB	BB	AA	NC	AB	AB	AB	BB	BB	NC	BB	BB	AB	AB	AB	NC	AA	BB	BB	BB	AB	AB		AA	AA	AB	AA	AB	AA	AA	AA	AA	AA	AA
1502	AX-89831356	BB	AA	AA	AB	AA	AA	AA	AA	AA	BB	AA	AA	AA	BB	AA	AA	AA	AA	AA	AA	AA	AA	AA	AA	AA	AA	AA	AA	AA	NC	AA	AA	AA	BB	BB	AA		AA	AA	AA	AA	AA	AA	AA	AA	AA	AA	AA
1503	AX-89829216	AB	AB	AB	AB	BB	AB	BB	BB	BB	AA	BB	BB	BB	BB	BB	AB	BB	BB	BB	BB	AB	AA	BB	AB	AB	BB	BB	BB	AB	NC	BB	BB	BB	AB	BB	BB		BB	AB	AB	BB	AB	BB	BB	BB	AB	BB	BB
1504	AX-89788632	AA	AB	AB	AB	BB	AA	BB	AA	BB	AA	BB	BB	BB	AB	BB	AB	BB	BB	BB	BB	AB	AB	BB	AB	AB	BB	BB	BB	AB	BB	BB	BB	BB	AA	AA	BB		BB	NC	NC	BB	NC	BB	BB	BB	NC	BB	BB
1505	AX-89886173	BB	AA	AA	AB	AB	AB	AA	AB	AA	AB	AA	AB	AA	AB	AB	AA	AA	AB	AA	AB	AA	AA	AA	AA	AA	AA	AB	AA	AB	AB	AA	AA	AA	BB	AB	AB		AA	AB	AA	AB	AA	AA	AB	AB	AB	AB	AA
1506	AX-89829156	AB	AB	AB	AB	AA	AB	AA	AA	AA	AA	AA	AA	AA	AA	AA	AB	AA	AA	AA	AA	AB	BB	AA	AB	AB	AA	AA	AA	AB	AA	AA	AA	AA	AA	AA	AA		AA	AB	AB	AA	AB	AA	AA	AA	AB	AA	AA
1507	AX-89788717	BB	AA	AA	AB	AB	AB	AB	AB	AA	AB	AA	AB	AA	NC	BB	AA	AA	AB	AA	AB	AA	AA	AA	AA	AA	AA	AB	AA	AB	AB	AB	AA	AA	BB	AB	AB		AA	AB	AA	AB	AA	AA	AB	AB	AB	AB	AA
1508	AX-89829068	BB	BB	BB	AB	AB	BB	AB	AB	BB	AB	BB	AB	BB	BB	AB	BB	BB	AB	BB	AB	BB	BB	BB	BB	BB	BB	AB	BB	AB	AB	AB	BB	BB	AB	BB	AB		BB	AB	BB	AB	BB	BB	AB	AB	AB	AB	BB
1509	AX-89832108	AA	AA	AB	AB	AA	AA	BB	AA	NC	AB	AA	AA	NC	AA	AB	AA	BB	AA	AA	AA	AB	AB	AA	NC	AA	AA	AA	AA	AA	NC	BB	AB	AB	AB	AA	AA		AA	AA	AA	AA	AA	AA	AA	AB	AA	AB	AA
1510	AX-89831610	AA	BB	AB	AB	BB	BB	BB	BB	BB	BB	AB	BB	NC	BB	AB	BB	BB	BB	BB	BB	AB	AB	BB	AB	BB	BB	BB	BB	BB	NC	AB	AB	AB	BB	BB	AB		BB	BB	BB	BB	BB	AB	BB	AB	BB	AB	BB
1511	AX-89887852	AB	BB	AB	AB	BB	BB	NC	AB	BB	AB	AB	BB	BB	BB	AB	BB	BB	BB	BB	BB	AB	AB	BB	NC	BB	BB	BB	BB	NC	BB	AB	AB	AB	BB	BB	AB		BB	BB	BB	BB	BB	AB	BB	AB	BB	AB	BB
1512	AX-89788760	BB	AB	AA	BB	BB	NC	AA	BB	AB	NC	AB	AB	BB	BB	AB	AB	AA	BB	AB	AB	AB	AB	BB	AB	AA	AB	AA	AB	AA	BB	AB	AB	AB	BB	BB	AA		AA	AB	AB	AB	AB	AB	AB	AB	AB	AA	AB
1513	AX-89829470	BB	AB	BB	AB	AA	BB	AA	AB	BB	BB	AB	BB	AA	AB	AB	BB	AA	AB	BB	BB	AB	AB	AB	BB	BB	BB	BB	BB	BB	NC	AA	BB	AB	BB	AB	BB		BB	NC	NC	NC	NC	NC	NC	NC	NC	BB	NC
1514	AX-89829476	BB	AB	BB	BB	AA	BB	BB	AB	AB	BB	AB	AB	AA	NC	AB	AB	BB	AA	AB	AB	AB	AB	AA	AB	BB	AB	BB	AB	BB	AA	AB	AB	AB	BB	BB	BB		BB	AB	AB	AB	AB	AB	AB	AB	AB	BB	AB
1515	AX-89831474	BB	AA	AA	AB	AA	AA	AA	AB	AA	BB	AA	AA	AA	AB	AA	AA	AA	AA	AA	AA	AA	AA	AA	AA	AA	AA	AA	AA	AA	NC	AA	AA	AA	BB	BB	AA		AA	AA	AA	AA	AA	AA	AA	AA	AA	AA	AA
1516	AX-89908495	BB	BB	AB	BB	BB	BB	BB	BB	BB	BB	AB	BB	BB	BB	AB	BB	BB	BB	BB	BB	AB	AB	BB	BB	BB	BB	BB	BB	BB	BB	AB	AB	AB	BB	BB	AB		BB	AB	BB	BB	BB	AB	BB	AB	BB	NC	BB
1517	AX-89829121	AB	BB	AB	BB	BB	BB	BB	BB	BB	BB	AB	BB	BB	BB	AB	BB	BB	BB	BB	BB	NC	AB	BB	BB	BB	BB	BB	BB	BB	BB	AB	NC	AB	BB	AB	AB		BB	BB	BB	BB	BB	AB	BB	AB	BB	AB	BB
1518	AX-89863790	AA	AA	AA	AA	AA	AA	AA	AA	AA	AB	AA	AA	AA	AA	AA	AA	AA	AA	AA	AA	AA	AA	AA	AA	AA	AA	AA	AA	AA	NC	AA	AA	AA	AB	AB	AA		AA	AA	AA	AA	AA	AA	AA	AA	AA	AA	AA
1519	AX-89832145	BB	AA	AA	AA	AA	AB	AA	AB	AA	AB	AA	AA	AA	AB	AA	AA	AA	AA	AA	AA	AA	AA	AA	AA	AA	AA	AA	AA	AA	NC	AA	AA	AA	AB	BB	AA		AA	AA	AA	AA	AA	AA	AA	AA	AA	AA	AA
1520	AX-89791078	BB	AA	AB	AB	AA	AA	AA	BB	AA	BB	AB	AA	AA	AB	AB	AA	AA	AA	AA	AA	AB	AB	AA	AA	AA	AA	AA	AA	AA	NC	AA	AB	AB	BB	BB	AB		AA	AA	AA	AA	AA	AB	AA	AB	AA	AB	AA
1521	AX-89857345	BB	BB	AB	AA	BB	BB	BB	BB	BB	BB	AB	BB	BB	BB	AA	BB	BB	BB	BB	BB	AB	AB	BB	BB	BB	BB	BB	BB	BB	BB	AB	AB	AB	BB	BB	AB		BB	AB	BB	BB	BB	AB	BB	AB	BB	NC	BB
1522	AX-89829113	AB	BB	AB	AA	BB	AA	BB	AB	BB	AB	AB	BB	BB	AB	AB	BB	BB	BB	BB	BB	AB	AB	BB	BB	BB	BB	BB	BB	BB	BB	AB	AB	AB	AB	BB	AB		BB	BB	BB	BB	BB	AB	BB	AB	BB	AB	BB
1523	AX-89791029	BB	AB	AA	AB	BB	BB	AA	BB	AB	BB	AB	AB	AB	NC	AB	AB	AA	BB	AB	AB	AB	AB	BB	AB	AA	AB	AA	AB	AA	BB	AB	AB	AB	BB	AB	AA		AA	AB	AB	AB	AB	AB	AB	AB	AB	AA	AB
1524	AX-89791398	BB	AB	AA	BB	AB	AB	BB	AB	AB	AB	AA	AB	AA	AB	AA	AB	BB	AA	BB	AB	BB	BB	AA	BB	BB	AB	BB	AB	NC	AB	AB	AB	AB	AB	BB	AB		AB	AB	AB	AA	AA	AA	AA	AA	AA	AB	AA
1525	AX-89791104	BB	AB	AB	AB	AB	BB	BB	BB	AB	BB	AA	AB	AB	NC	AA	AB	BB	AA	BB	BB	BB	BB	AB	AB	BB	BB	AB	AB	BB	BB	AB	AB	AB	BB	AB	AB		AB	AB	AB	AA	AA	AB	AA	AB	AA	BB	AB
1526	AX-89848712	AB	AB	AB	AA	AB	AA	BB	AB	AB	AA	AB	AB	AB	AA	AB	AB	BB	AA	BB	BB	BB	BB	AB	AB	BB	BB	BB	AB	BB	BB	BB	AB	AB	AA	AA	BB		AB	AB	AB	AA	AA	AB	AA	AB	AA	BB	AB
1527	AX-89828542	BB	AB	AB	AB	AB	AB	BB	AB	AB	AB	AB	AB	AB	AB	AB	AB	BB	AA	BB	BB	BB	BB	AB	AB	BB	BB	BB	AB	BB	BB	BB	AB	AB	BB	AB	BB		AB	AB	AB	AA	AA	AB	AA	AB	AA	BB	AB
1528	AX-89828538	AA	AB	AB	AB	AB	AA	AA	AB	AB	AB	AB	AB	AB	NC	AB	AB	AA	BB	AA	AA	AA	AA	AB	AB	AA	AA	AA	AB	AA	AA	AA	AB	AB	AA	AB	AA		AB	AB	AB	BB	BB	AB	BB	AB	BB	AA	AB
1529	AX-89831700	AB	BB	NC	AB	AB	BB	BB	AB	BB	AB	BB	BB	AB	AB	BB	BB	BB	AB	BB	BB	BB	BB	BB	BB	BB	BB	BB	BB	BB	BB	BB	BB	BB	AB	AB	BB		AB	AB	AB	NC	NC	AB	NC	AB	NC	BB	AB
1530	AX-89828549	AA	AB	AB	AB	AB	AA	BB	AB	AB	AB	AB	AB	AB	AA	AB	AB	BB	AA	BB	BB	BB	BB	AB	AB	BB	BB	BB	AB	BB	BB	BB	AB	AB	BB	AA	BB		AB	AB	AB	AA	AA	AB	AA	AB	AA	BB	AB
1531	AX-89788163	AA	AA	AB	AA	AB	AA	AA	AB	AB	AA	AB	AA	AA	AB	AB	AB	AB	AA	AA	AA	BB	AA	AA	NC	AA	AA	AB	AA	AB	AB	AB	AB	AB	BB	BB	AB		AA	AA	AA	AA	AA	AB	AA	AB	AA	AB	AA
1532	AX-89872589	AA	AA	AB	BB	AB	AA	AA	AB	AB	BB	AB	AA	AA	BB	AB	AB	AB	AA	AA	AA	BB	AA	AA	AA	AA	AA	AB	AA	AB	AB	AB	AB	AB	AB	AB	AB		AA	AA	AA	AA	AA	AB	AA	AB	AA	AB	AA
1533	AX-89831805	BB	AB	AB	BB	NC	BB	BB	BB	AB	BB	AB	AB	AB	NC	AB	AA	BB	AB	BB	BB	BB	AB	AB	AB	AB	BB	BB	AB	BB	BB	BB	AB	AB	BB	BB	BB		AB	AB	AB	AB	AB	AB	AB	AB	AB	BB	AB
1534	AX-89791191	BB	AB	AB	AB	AB	BB	BB	BB	AB	BB	AB	AB	AB	AB	AB	AB	BB	AA	BB	BB	BB	BB	AB	AB	BB	BB	BB	AB	BB	BB	BB	AB	AB	BB	BB	BB		AA	AB	AB	AA	AA	AB	AA	AB	AA	BB	AB
1535	AX-89831719	BB	AB	AB	AB	AB	BB	AA	AB	AB	AB	AB	AB	AB	AB	AB	AB	AA	BB	AA	AA	AA	AA	AB	AB	AA	AA	AA	AB	AA	AA	AA	AB	AB	BB	BB	AA		BB	AB	AB	BB	BB	AB	BB	AB	BB	AA	AB
1536	AX-89791161	AB	AB	AB	AB	AB	AB	BB	AB	AB	AB	AB	AB	AB	AB	AB	AB	BB	AA	BB	BB	BB	BB	AB	AB	BB	BB	BB	AB	BB	BB	BB	AB	AB	AB	AB	BB		AA	AB	AB	AA	AA	AB	AA	AB	AA	BB	AB
1537	AX-89831800	BB	AA	AB	BB	AB	BB	BB	BB	AB	BB	AB	AB	AA	BB	AB	AB	BB	AA	BB	BB	BB	AB	AA	AB	AB	BB	BB	AB	BB	BB	BB	AB	AB	BB	BB	BB		AA	AB	AB	AA	AA	AB	AA	AB	AA	BB	AB
1538	AX-89791334	BB	AA	AB	NC	AB	AB	BB	AB	AB	BB	AB	AB	AA	BB	AB	AB	BB	NC	BB	BB	BB	AB	AA	AB	AB	BB	BB	AB	BB	BB	BB	AB	AB	BB	BB	BB		AA	AB	AB	AA	AA	AB	AA	AB	AA	BB	AB
1539	AX-89791384	BB	AA	AB	BB	AB	BB	BB	AB	AB	BB	AB	AB	AB	NC	AB	AB	BB	AA	BB	BB	BB	AB	AA	AB	AB	BB	BB	AB	BB	BB	BB	AB	AB	BB	BB	BB		AA	AB	AB	AA	AA	AA	AA	AB	AA	BB	AB
1540	AX-89788337	AA	AA	AB	AB	AB	AB	BB	AB	AB	AB	AB	AB	AB	NC	AB	AB	BB	AA	BB	BB	BB	AB	AB	AB	AB	BB	BB	AB	BB	BB	BB	AB	AB	AA	AB	BB		AA	AB	AB	AB	AA	AB	AA	AB	AB	BB	AB
1541	AX-89828638	BB	AA	AB	AA	AB	BB	BB	AB	AB	AA	AB	AB	AA	NC	AB	AB	BB	AA	BB	BB	BB	AB	AA	AB	AB	BB	BB	AB	BB	BB	BB	AB	AB	BB	AB	BB		AA	AB	AB	AA	AA	AB	AA	AB	AA	BB	AB
1542	AX-89885764	BB	AA	AB	BB	AB	BB	BB	BB	AB	BB	AB	AB	AA	BB	AB	AB	BB	NC	BB	BB	BB	AB	AA	AB	AB	BB	BB	AB	BB	BB	BB	AB	AB	BB	BB	BB		AA	AB	AB	AA	AA	AB	AA	AB	AA	BB	AB
1543	AX-89828725	BB	AA	AB	AB	AB	AB	BB	AB	AB	AB	AB	AB	AA	AB	AB	AB	BB	AA	BB	BB	BB	AB	AA	AB	AB	BB	BB	AB	BB	BB	BB	AB	AB	BB	AB	BB		AA	AB	AB	AA	AA	AB	AA	AB	AA	BB	AB
1544	AX-89791160	AA	BB	AB	AB	AB	AB	BB	AB	AB	AB	AB	BB	BB	AA	AB	AB	AB	BB	BB	BB	AA	BB	BB	NC	BB	BB	AB	BB	AB	AB	AB	AB	AB	AA	AB	AB		BB	BB	BB	BB	BB	AB	BB	AB	BB	AB	BB
1545	AX-89831925	AA	AA	AB	AB	AB	AB	AA	AB	AB	AA	AB	AA	AA	AB	AB	AB	AA	AA	AA	AA	BB	AA	AA	AB	AA	AA	AB	AA	AB	AB	AA	AB	AB	AA	AA	AB		AA	AA	AA	AA	AA	AB	AA	AB	AA	AB	AA
1546	AX-89788261	AA	AA	AB	BB	AB	AB	BB	BB	AB	BB	AB	AB	AA	NC	AB	AB	BB	AA	BB	BB	BB	AB	AA	NC	AB	BB	BB	AB	BB	BB	BB	NC	AB	BB	AB	BB		AA	AB	AB	AA	AA	AB	AA	AB	AA	BB	AB
1547	AX-89831918	BB	BB	AB	BB	AB	BB	AA	AB	AB	BB	AB	AB	BB	BB	AB	AB	AA	BB	AA	AA	AA	AB	BB	AB	AB	AA	AA	AB	AA	AA	AA	AB	AB	BB	BB	AA		BB	AB	AB	BB	BB	AB	BB	AB	BB	AA	AB
1548	AX-89829672	AB	BB	AB	AA	AB	BB	BB	AB	AB	AA	AB	BB	BB	AB	AB	AB	AB	BB	BB	BB	AA	BB	BB	BB	BB	BB	AB	BB	AB	AB	AB	AB	AB	NC	AA	AB		BB	BB	BB	BB	BB	NC	BB	NC	BB	AB	BB
1549	AX-89828599	AA	AA	AB	AB	AB	BB	AA	BB	NC	BB	AB	NC	AA	BB	AB	NC	AB	NC	NC	NC	NC	AA	NC	AB	AB	NC	AB	AB	AB	NC	AB	NC	AB	BB	BB	AB		AA	AA	AA	AA	AA	AB	AA	AB	AA	AB	AA
1550	AX-89829691	AB	AA	AB	BB	AB	BB	AA	AB	AB	BB	AB	AA	NC	AB	AB	AB	AB	AA	AA	AA	AB	AA	AA	AA	AA	AA	AB	AA	AB	AB	AB	AB	AB	BB	BB	AB		AA	AA	AA	AA	AA	AB	AA	AB	AA	AB	AA
1551	AX-89788214	BB	AB	AB	AB	AB	AB	BB	AB	AB	AB	AB	AB	AA	NC	AB	AB	BB	AA	BB	BB	BB	AB	AA	BB	AB	BB	BB	AB	BB	BB	BB	AB	AB	BB	AB	BB		AA	AB	AB	AA	AA	AB	AA	AB	AA	BB	AB
1552	AX-89829688	AA	BB	AB	AA	AB	AA	BB	AB	NC	AA	AB	BB	BB	AA	AB	NC	AB	BB	BB	BB	BB	BB	BB	BB	BB	BB	AB	BB	NC	AB	AB	AB	AB	AA	AA	AB		BB	BB	BB	BB	BB	AB	BB	AB	BB	AB	BB
1553	AX-89807470	BB	AA	AB	BB	AB	BB	AA	BB	AB	BB	NC	AA	AA	BB	AB	AB	AB	AA	AA	AA	BB	AA	AA	AA	AA	AA	AB	AA	AB	AB	AB	AB	AB	BB	BB	AB		AA	AA	AA	AA	AA	AB	AA	AB	AA	AB	AA
1554	AX-89886778	AA	BB	AB	AB	AB	AB	BB	AB	AB	AB	AB	BB	BB	AB	NC	AB	AB	BB	BB	BB	AA	BB	BB	BB	BB	BB	AB	BB	AB	AB	AB	AB	AB	AA	AB	AB		BB	BB	BB	BB	BB	AB	BB	AB	BB	AB	BB
1555	AX-89905173	BB	BB	AB	BB	AB	BB	BB	AB	AB	BB	AB	BB	BB	BB	AB	AB	AB	BB	BB	BB	AA	BB	BB	BB	BB	BB	AB	BB	AB	AB	AB	AB	AB	BB	BB	AB		BB	BB	BB	BB	BB	AB	BB	AB	BB	AB	BB
1556	AX-89829615	AB	AA	AB	AA	AB	BB	AA	AB	AB	AA	AB	AA	AA	AB	AB	AB	AB	AA	AA	AA	BB	AA	AA	AA	AA	AA	AB	AA	AB	AB	AB	AB	AB	AB	AB	AB		AA	AA	AA	AA	AA	AB	AA	AB	AA	AB	AA
1557	AX-89829595	AB	BB	AB	AB	AB	AA	AA	AB	AB	NC	AB	BB	BB	AA	AB	AB	AA	NC	BB	BB	AA	BB	NC	BB	BB	BB	AB	BB	AB	AB	AA	AB	AB	AB	AB	AB		BB	BB	BB	BB	BB	AB	BB	AB	BB	AB	BB
1558	AX-89863592	AB	AA	AB	AB	AB	AB	AA	AB	AB	AB	AB	AA	AA	AB	AB	AB	AB	AA	AA	AA	BB	AA	AA	AB	AA	AA	AB	AA	AB	AB	AB	AB	AB	AB	AB	AB		AA	AA	AA	AA	AA	AB	AA	AB	AA	AB	AA
1559	AX-89789128	AB	BB	AB	AB	AB	AB	BB	AB	AB	BB	AB	BB	BB	BB	AB	AB	AB	BB	BB	BB	AA	BB	BB	BB	BB	BB	AB	BB	AB	AB	AB	AB	AB	BB	AB	AB		BB	BB	BB	BB	BB	AB	BB	AB	BB	AB	BB
1560	AX-89789134	BB	AB	AB	AB	AB	AB	BB	AB	AB	AB	AB	AB	AA	NC	AB	AB	BB	AA	BB	BB	BB	AB	AA	BB	BB	BB	BB	AB	BB	BB	BB	AB	AB	BB	AB	BB		AA	AB	AB	AA	AA	AB	AA	AB	AA	BB	AB
1561	AX-89789255	AA	AB	BB	AA	BB	AA	AA	AB	BB	NC	BB	AB	BB	AA	BB	BB	AB	BB	AA	AA	BB	AB	BB	AA	AB	AA	AB	AB	AB	AB	AB	BB	BB	AA	AA	AB		BB	AB	AB	BB	BB	BB	BB	BB	BB	AB	AB
1562	AX-89829536	BB	AB	AB	BB	AB	BB	AA	BB	AB	BB	AB	AB	BB	NC	AB	AB	AA	BB	AA	AA	AA	AB	BB	AA	AA	AA	AA	AB	AA	AA	AA	AB	AB	BB	BB	AA		BB	AB	AB	BB	BB	AB	BB	AB	BB	AA	AB
1563	AX-89886710	AA	AB	AB	AA	AB	AA	BB	AA	AB	AA	AB	AB	AA	AA	AB	AB	BB	AA	BB	BB	BB	AB	AA	BB	BB	BB	BB	AB	BB	BB	BB	AB	AB	AA	AA	BB		AA	AB	AB	AA	AA	AB	AA	AB	AA	BB	AB
1564	AX-89789097	AA	AB	AB	AA	AB	AA	AA	AB	AB	AA	AB	AB	BB	AB	AB	AB	AA	BB	AA	AA	AA	AB	BB	AA	AA	AA	AA	AB	AA	AA	AA	AB	AB	BB	AB	AA		BB	AB	AB	BB	BB	AB	BB	AB	BB	AA	AB
1565	AX-89788223	AA	AB	BB	BB	BB	AB	AB	BB	BB	BB	BB	AB	BB	NC	BB	BB	AB	BB	AA	AA	BB	AB	BB	AA	AB	AA	AB	AB	AB	AB	AB	BB	BB	BB	AB	AB		BB	AB	AB	BB	BB	BB	BB	BB	BB	AB	AB
1566	AX-89789066	BB	AB	AB	AB	AB	AB	AA	AB	AB	AB	AB	AB	BB	NC	AB	AB	AA	BB	AA	AA	AA	AB	BB	AA	AA	AA	AA	AB	AA	AA	AA	AB	AB	BB	AB	AA		BB	AB	AB	BB	BB	AB	BB	AB	BB	AA	AB
1567	AX-89829503	BB	BB	AB	BB	AB	AB	BB	BB	AB	BB	AB	BB	BB	AB	AB	AB	AB	BB	AB	BB	AA	BB	BB	AB	BB	BB	AB	BB	AB	AB	AB	AB	AB	BB	BB	AB		BB	BB	BB	BB	BB	AB	BB	AB	BB	AB	BB
1568	AX-89829743	AB	AB	AB	BB	AB	AA	BB	AB	AB	BB	AB	AB	AA	AB	AB	AB	BB	AA	BB	BB	BB	AB	AA	BB	BB	AB	BB	AA	BB	AB	AB	AB	AB	AB	BB	BB		AA	AB	AB	AA	AA	AB	AA	AB	AA	BB	AB
1569	AX-89829286	BB	BB	NC	BB	AB	BB	BB	AB	AB	BB	AB	BB	BB	AB	AB	AB	AB	BB	AB	BB	AA	BB	BB	BB	BB	BB	AB	BB	AB	AB	AB	AB	AB	BB	BB	AB		BB	BB	BB	BB	BB	AB	BB	AB	BB	AB	BB
1570	AX-89788393	BB	AB	AB	AB	AB	AB	AA	AB	AB	AB	AB	AB	BB	NC	AB	AB	AA	AB	AA	AA	AA	AB	BB	AA	AA	AA	AA	BB	AA	AA	AA	AB	AB	BB	AB	AA		BB	AB	AB	BB	BB	AB	BB	AB	BB	AA	AB
1571	AX-89828816	BB	AA	AB	AB	AB	AB	AA	AB	AB	AB	AB	AA	AA	AB	AB	AB	AA	AA	AB	AA	BB	AA	AA	AA	AA	AA	AB	AA	AB	AB	AA	AB	AB	AB	AB	AB		AA	AA	AA	AA	AA	AB	AA	AB	AA	AB	AA
1572	AX-89829345	BB	AA	AB	BB	AB	BB	AA	BB	AB	BB	AB	AB	AB	NC	AB	AB	AA	AB	AA	AA	AA	AA	BB	AA	AA	AB	AA	BB	AA	AA	AA	AB	AA	BB	BB	AA		BB	AB	AB	BB	BB	AB	AB	AB	BB	AA	AB
1573	AX-89788877	BB	BB	AB	AB	AB	AB	BB	AB	AB	AB	AB	AB	AB	NC	AB	AB	BB	AB	BB	BB	BB	BB	AA	BB	BB	AB	BB	AA	BB	BB	BB	AB	BB	BB	AB	BB		AA	AB	AB	AA	AA	AB	AB	AB	AA	BB	AB
1574	AX-89829374	BB	BB	AB	BB	AB	BB	NC	NC	AB	BB	AB	AB	AB	NC	AB	AB	BB	AB	BB	BB	BB	BB	NC	BB	BB	AB	BB	AA	BB	BB	BB	AB	BB	BB	BB	BB		AA	AB	AB	AB	AA	AB	AB	AB	AB	BB	AB
1575	AX-89788963	AB	AA	AB	AA	AB	AA	NC	AA	AB	AA	AB	AB	AB	NC	AB	AB	AA	AB	AA	AA	AA	AA	BB	AA	AA	AB	AA	BB	AA	AA	AA	AB	AA	AB	AA	AA		BB	AB	AB	BB	BB	AB	AB	AB	BB	AA	AB
1576	AX-89852346	BB	AB	BB	BB	AB	BB	AA	AB	AB	AB	AB	AB	BB	AB	AB	AB	AA	AB	AA	AA	AA	AB	BB	AA	AA	AB	AA	BB	AB	AB	AA	AB	AA	BB	BB	AA		BB	AB	AB	BB	BB	BB	AB	BB	BB	AB	AB
1577	AX-89848399	AB	AB	BB	AB	AB	BB	AA	BB	AB	AB	AB	AB	BB	BB	AB	AB	AA	AB	AA	AA	AA	AB	BB	AA	AA	AB	AA	BB	AB	AB	AA	AB	AA	BB	AB	AA		BB	AB	AB	BB	BB	BB	AB	BB	BB	AB	AB
1578	AX-89789032	BB	AB	AA	AA	AB	NC	BB	AA	AB	AA	AA	AB	AA	AA	AA	AB	NC	AB	AB	BB	AB	AB	AA	BB	BB	NC	AB	AA	AB	AB	AA	AB	AB	AA	AA	AB		AA	AB	AB	AA	AA	AA	AB	AA	AA	AB	AB
1579	AX-89789349	AB	AB	AA	BB	AB	AB	BB	AB	AB	BB	AA	AB	AA	BB	AA	AB	BB	AB	AB	BB	AB	AB	AA	BB	BB	AA	AB	AA	AB	AB	AA	AB	AB	AB	AB	AB		AA	AB	AB	AA	AA	AA	AB	AA	AA	AB	AB
1580	AX-89829785	AB	AA	AA	BB	AA	BB	AA	BB	AA	AB	AA	AA	AA	AB	AA	AA	AA	AA	AA	AA	AA	AA	AA	AA	AA	AA	AA	AA	AA	NC	AA	AA	AA	BB	BB	AA		AA	AA	AA	AA	AA	AA	AA	AA	AA	AA	AA
1581	AX-89829793	BB	AA	BB	AB	AB	BB	AA	BB	AB	BB	AB	AB	BB	AB	AB	AB	AA	BB	AA	AA	AA	AA	BB	AA	AA	BB	AB	BB	AB	AA	AA	NC	AA	BB	AB	AA		BB	AB	AB	BB	BB	BB	AB	BB	BB	AB	AB
1582	AX-89789435	BB	AA	BB	AA	AB	AB	AA	AA	AB	AA	AB	AB	BB	NC	AB	AB	AB	AB	AA	AA	AA	AA	BB	AA	AA	AB	AA	BB	AB	AA	AA	AB	AA	AA	AB	AA		BB	AB	AB	BB	BB	BB	AB	BB	BB	AB	AB
1583	AX-89804474	AA	BB	AB	AB	AB	NC	BB	AA	AB	AB	AB	AB	NC	NC	AB	AA	AB	AB	BB	BB	BB	BB	AA	BB	BB	AB	BB	AA	AB	NC	BB	AB	BB	AA	AA	BB		AA	AB	AA	NC	AA	AA	NC	AA	AA	AA	AA
1584	AX-89789413	BB	AB	BB	NC	AB	NC	AA	AB	AB	BB	BB	AB	BB	BB	BB	BB	AB	AB	AB	AA	AB	AB	BB	NC	AA	BB	AB	BB	AB	AB	BB	AB	AB	AA	AA	AB		BB	AB	AB	BB	BB	BB	AB	BB	BB	AB	AB
1585	AX-89789498	BB	BB	BB	AB	BB	AB	BB	AB	BB	BB	BB	BB	BB	AB	BB	BB	BB	BB	BB	BB	BB	BB	BB	BB	BB	BB	BB	BB	BB	NC	BB	BB	BB	AB	AA	BB		BB	BB	BB	BB	BB	BB	BB	BB	BB	BB	BB
1586	AX-89789981	AB	BB	BB	AA	BB	BB	BB	AB	BB	AB	BB	BB	BB	AB	BB	BB	BB	BB	BB	BB	BB	BB	BB	BB	BB	BB	BB	BB	BB	NC	BB	BB	BB	AA	AB	BB		BB	BB	BB	BB	BB	BB	BB	BB	BB	NC	BB
1587	AX-89829969	BB	AB	AA	BB	AB	BB	BB	AB	AA	BB	AA	AB	AB	BB	AA	AA	AB	AB	AB	BB	AB	AB	AA	BB	BB	AA	AB	AA	AB	AB	AA	AB	AA	BB	BB	AB		AA	AB	AB	AA	AA	AA	AB	AA	AA	AB	AB
1588	AX-89789742	AA	AB	AA	AB	AB	AB	BB	BB	AB	NC	AB	AB	AB	AA	AB	AA	AB	AB	AB	BB	BB	AB	BB	BB	BB	AA	AB	AB	AA	AB	AB	AB	BB	BB	AB	AB		AA	AB	AA	AA	AA	AA	AB	AB	AA	AB	AB
1589	AX-89830221	BB	AB	BB	AB	AB	BB	AA	AB	AB	AB	AB	AB	AB	AB	AB	BB	AB	AB	AB	AA	AA	AB	AA	AA	AA	BB	AB	AB	BB	AB	AB	AB	AA	BB	BB	AB		BB	AB	AB	BB	BB	BB	AB	AB	BB	AB	AB
1590	AX-89905216	BB	AB	AA	BB	AB	AB	BB	AB	AB	AB	AB	AB	AB	BB	AB	AA	AB	AB	AB	BB	BB	AB	BB	BB	BB	AA	AB	AB	AA	AB	AB	AB	BB	BB	BB	AB		AA	AB	AA	AA	AA	AA	AB	AB	AA	AB	AB
1591	AX-89789782	BB	AB	AA	BB	AB	BB	BB	AB	AB	BB	AB	AB	AA	BB	AB	AA	AB	AB	AB	BB	BB	AB	AB	BB	BB	AA	AB	AB	AA	AB	AB	AB	BB	BB	BB	AB		AA	AB	AA	AA	AA	AA	AB	AB	AA	AB	AB
1592	AX-89830229	AA	AA	BB	AB	AB	AA	AA	AB	AB	AB	AA	AB	AA	AB	AB	BB	AB	AB	AA	AA	AA	AA	AA	AA	AA	BB	AA	AB	AB	AA	AA	AB	AA	NC	AA	AA		BB	AB	BB	BB	BB	BB	AB	AB	BB	AB	AB
1593	AX-89789749	AA	AB	BB	AA	BB	AA	BB	AA	BB	AA	AB	BB	AB	AB	BB	BB	BB	BB	AB	BB	BB	AB	BB	BB	BB	BB	AB	BB	AB	AB	AB	BB	BB	AA	AA	AB		BB	BB	BB	BB	BB	BB	BB	BB	BB	BB	BB
1594	AX-89830188	AB	BB	AA	AA	AB	AA	BB	NC	AB	AB	BB	AB	BB	AA	AB	AA	AB	AB	BB	BB	BB	BB	BB	BB	BB	AA	BB	AB	AB	BB	BB	AB	BB	AA	AA	BB		AA	AB	AA	AA	AA	AA	AB	AB	AA	AB	AB
1595	AX-89789797	AB	AB	BB	BB	BB	BB	BB	BB	BB	BB	NC	BB	AB	AB	BB	BB	BB	BB	AB	BB	BB	AB	BB	BB	BB	BB	AB	BB	AB	NC	AB	BB	BB	AB	AB	AB		BB	BB	BB	BB	BB	BB	BB	BB	BB	NC	BB
1596	AX-89789790	BB	AB	BB	BB	BB	BB	BB	BB	BB	BB	AB	BB	AB	BB	BB	BB	BB	BB	AB	BB	BB	AB	BB	BB	BB	BB	AB	BB	AB	AB	AB	BB	BB	BB	BB	AB		BB	BB	BB	BB	BB	BB	BB	BB	BB	BB	BB
1597	AX-89830427	AA	AA	AA	AB	AA	BB	AA	AA	AA	AB	AA	AA	AA	AB	AA	AA	AA	AA	AA	AA	AA	AA	AA	AA	AA	AA	AA	AA	AA	NC	AA	AA	AA	AB	AB	AA		AA	AA	AA	AA	AA	AA	AA	AA	AA	AA	AA
1598	AX-89830343	BB	AB	AA	AB	AA	BB	AA	AB	AA	BB	AB	AA	AB	BB	AA	AA	AA	AA	AB	AA	AA	AB	AA	AA	AA	AA	AB	AA	AB	NC	AB	AA	AA	AB	BB	AB		AA	AA	AA	AA	AA	AA	AA	AA	AA	AA	AA
1599	AX-89830410	BB	AB	BB	AB	AB	AA	BB	AA	BB	BB	AB	BB	AB	BB	BB	BB	BB	BB	AB	BB	BB	AB	BB	BB	BB	BB	AB	BB	AB	NC	AB	BB	BB	AB	AB	AB		BB	BB	BB	BB	BB	BB	BB	BB	BB	BB	BB
1600	AX-89830308	AB	AB	AA	AA	AA	AB	AA	AA	AA	NC	AB	AA	AB	BB	AA	AA	AA	AA	AB	AA	AA	AB	AA	AA	AA	AA	AB	AA	AB	AB	AA	AA	AA	AA	AB	AB		AA	AA	AA	AA	AA	AA	AA	AA	AA	AA	AA
1601	AX-89789673	BB	AB	BB	BB	AB	BB	AB	BB	AB	BB	AB	AB	BB	BB	AB	BB	AB	AB	AB	AA	AA	AB	AA	AA	AA	BB	AB	AB	BB	AB	AB	AB	AA	BB	BB	AB		BB	AB	BB	BB	BB	BB	AB	AB	BB	AB	AB
1602	AX-89887325	AB	AB	BB	BB	AB	BB	AA	AB	AB	AB	AB	AB	AB	AB	AB	NC	AB	AB	AB	AA	AA	AB	AA	AA	AA	BB	AB	AB	BB	AB	AB	AB	AA	AB	AA	AB		BB	AB	BB	BB	BB	BB	AB	AB	BB	AB	AB
1603	AX-89789639	NC	AB	BB	BB	AB	BB	AA	AB	AB	BB	AB	AB	AB	NC	AB	BB	AB	AB	AB	AA	AA	AB	AA	AA	AA	BB	AB	AB	BB	AB	AB	AB	AA	BB	BB	AB		BB	AB	BB	BB	BB	BB	AB	AB	BB	AB	AB
1604	AX-89790197	BB	AB	AB	BB	BB	BB	AB	AB	AB	BB	AB	AB	AB	BB	AA	AB	AB	NC	AB	AB	BB	AB	AA	AA	AA	AB	AB	AA	AB	AB	AB	AB	AA	BB	BB	BB		AB	BB	AA	BB	AB	AB	BB	AA	BB	AB	NC
1605	AX-89790235	AA	AB	AB	AA	BB	AA	AB	AA	AB	AA	AB	AB	AB	AA	AB	AB	AB	AB	AB	AB	BB	AB	AA	AA	AA	BB	AB	AA	AB	AB	AB	BB	AA	AA	AA	BB		AB	BB	AB	BB	AB	AB	BB	AA	BB	AB	AB
1606	AX-89848557	AB	AB	AB	AB	BB	BB	AB	BB	AB	AA	AB	AB	AB	AB	AB	AB	AB	AB	AB	AB	AB	AB	AA	AA	AA	BB	AB	AA	AB	AB	AB	BB	AA	BB	AB	BB		AB	BB	AB	BB	AB	AB	BB	AA	BB	AB	AB
1607	AX-89790233	BB	BB	AB	AB	AB	AB	BB	AB	AB	AA	BB	AB	BB	BB	BB	AB	AB	AB	BB	AB	BB	BB	BB	BB	BB	AB	BB	BB	BB	BB	BB	BB	BB	AB	BB	AB		AB	AA	BB	AA	AB	AB	AA	BB	AA	AB	AB
1608	AX-89830817	AB	BB	AB	AA	AB	AA	BB	AA	AB	NC	BB	AB	BB	AA	BB	AB	AB	AB	BB	AB	BB	BB	BB	BB	BB	AB	BB	BB	BB	BB	BB	BB	BB	AA	AA	AB		AB	AA	BB	AA	AB	AB	AA	BB	AA	AB	AB
1609	AX-89790205	BB	AA	AB	AB	AB	BB	AB	AB	AB	AB	AA	AB	AA	AB	AA	AB	BB	AB	AA	AB	AA	AA	AA	AA	AA	AB	AA	AA	AA	NC	AB	AA	AA	BB	BB	AB		AB	AB	AA	AB	AB	AB	AB	AA	AB	AB	AB
1610	AX-89830822	BB	AB	AA	AB	AB	AB	AB	AB	AA	BB	AB	AA	AB	AB	AB	AA	AA	AA	AB	AA	BB	AB	AA	AA	AA	AB	AB	AA	AB	AB	AB	BB	AA	AB	AB	AB		AA	AA	NC	AA	AA	AA	AA	AA	AA	AA	AA
1611	AX-89848558	BB	BB	AB	AB	AB	BB	BB	AB	AB	AB	BB	AB	BB	BB	AB	AB	AB	AB	BB	AB	BB	BB	BB	BB	BB	AA	BB	BB	BB	BB	BB	AB	BB	BB	BB	AB		AB	AA	AB	AA	AB	AB	AA	BB	AA	AB	AB
1612	AX-89888043	AB	BB	AB	BB	BB	AB	BB	BB	AB	AB	BB	BB	BB	BB	BB	BB	BB	BB	BB	BB	BB	BB	BB	BB	BB	BB	BB	BB	AB	NC	BB	BB	AB	AB	AB	BB		AB	BB	BB	BB	AB	AB	BB	AB	BB	AB	BB
1613	AX-89790360	AA	AB	BB	AB	BB	BB	BB	BB	BB	BB	BB	BB	BB	BB	BB	BB	BB	BB	BB	BB	BB	BB	BB	BB	BB	BB	BB	BB	BB	NC	BB	BB	BB	BB	BB	BB		BB	BB	BB	BB	BB	BB	BB	BB	BB	BB	BB
1614	AX-89905273	AA	AA	AA	AA	AA	AA	AA	AA	AA	AA	AA	AA	AA	AA	AB	AA	AA	AA	AA	AA	AA	AA	AA	AA	AA	AB	AA	AA	AA	AA	AA	AB	AA	AA	AA	AA		AA	AA	NC	AA	AA	AA	AA	AA	AA	AA	AA
1615	AX-89790395	BB	BB	AB	BB	BB	BB	BB	BB	BB	BB	BB	BB	BB	NC	BB	BB	BB	BB	BB	BB	BB	BB	BB	BB	BB	BB	BB	BB	AB	BB	BB	BB	AB	BB	BB	BB		AB	BB	BB	BB	AB	AB	BB	BB	BB	AB	BB
1616	AX-89790398	AA	BB	AB	AB	BB	AA	BB	AB	BB	AB	BB	BB	BB	AB	AB	BB	BB	BB	BB	BB	BB	BB	BB	BB	BB	AB	BB	BB	AB	NC	BB	AB	AB	AA	AA	BB		AB	BB	AB	BB	AB	AB	BB	BB	BB	AB	BB
1617	AX-89830936	AA	BB	AB	AA	BB	AA	BB	AA	BB	AA	BB	BB	BB	NC	AB	BB	BB	BB	BB	BB	BB	BB	BB	BB	BB	AB	BB	BB	AB	BB	BB	AB	AB	AA	AA	BB		AB	BB	AB	BB	AB	AB	BB	BB	BB	AB	BB
1618	AX-89831015	AA	BB	AB	AB	BB	AA	BB	AB	BB	AB	BB	BB	BB	AA	BB	BB	BB	BB	BB	BB	BB	BB	BB	BB	BB	BB	BB	BB	AB	NC	BB	BB	AB	AA	AA	BB		AB	BB	BB	BB	AB	AB	BB	BB	BB	AB	BB
1619	AX-89913145	AA	AA	AB	AB	AA	BB	AA	BB	AA	BB	AA	AA	AA	BB	AA	AA	AA	AA	AA	AA	AA	AA	AA	AA	AA	AA	AA	AA	AB	NC	AA	AA	AB	BB	BB	AA		AB	AA	AA	AA	AB	AB	AA	AA	AA	AB	AA
1620	AX-89790495	BB	AB	AB	BB	AB	BB	AB	AB	AA	BB	AB	AA	AB	AB	AA	AA	AA	AA	NC	AA	AB	AB	AA	AA	AA	AA	AB	AA	BB	AB	AB	AB	AB	BB	BB	AB		AB	AA	AA	AA	AB	AB	AA	AA	AA	AB	AA
1621	AX-89905291	AB	AB	AB	BB	AB	AA	AB	AB	BB	BB	AB	BB	AB	BB	BB	BB	BB	BB	AB	BB	AB	AB	BB	BB	BB	BB	AB	BB	AA	AB	AB	AB	AB	BB	BB	AB		AB	BB	BB	BB	AB	AB	BB	BB	BB	AB	BB
1622	AX-89848603	AA	AB	AB	AA	AB	AA	AB	AA	AA	AA	AB	AA	AB	NC	AA	AA	AA	AA	AB	AA	AB	AB	AA	AA	AA	AA	AB	AA	BB	AB	AB	AB	AB	AA	AA	AB		AB	AA	AA	AA	AB	AB	AA	AA	AA	AB	AA
1623	AX-89790497	AB	AB	AB	BB	AB	AB	AB	BB	AA	BB	AB	AA	AB	BB	AA	AA	AA	AA	AB	AA	AB	AB	AA	AA	AA	AA	AB	AA	BB	AB	AB	AB	AB	AA	AB	AB		AB	AA	AA	AA	AB	AB	AA	AA	AA	AB	AA
1624	AX-89831060	AB	AB	AB	AB	AB	AB	AB	BB	AA	AA	AB	AA	AB	AB	AA	AA	AA	AA	AB	AA	AB	AB	AA	AA	AA	AA	AB	AA	BB	AB	AB	AB	AB	AB	AB	AB		AB	AA	AA	AA	AB	AB	AA	AA	AA	AB	AA
1625	AX-89848593	AA	AB	AB	AA	AB	AA	AB	AA	AA	AA	AB	AA	AB	NC	AA	AA	AA	AA	AB	AA	AB	AB	NC	NC	AA	AA	AB	AA	BB	AB	AB	AB	AB	AA	AA	AB		AB	AA	AA	AA	AB	AB	AA	AA	AA	AB	AA
1626	AX-89790550	AB	AB	AB	BB	AB	AB	AB	AB	AA	BB	AB	AA	AB	NC	AA	AA	AA	AA	AB	AA	AB	AB	AA	AB	AA	NC	AB	AA	BB	AB	AB	AB	AB	AB	BB	AB		AB	AA	AA	AA	AB	AB	AA	AA	AA	AB	AA
1627	AX-89848605	AA	AB	AB	AB	AB	AA	NC	AB	AB	AB	AB	AB	BB	AA	AA	AB	AA	AB	BB	AB	AB	AB	AB	AB	AB	AB	AB	AB	NC	NC	AB	BB	AB	AA	AA	BB		BB	AB	AB	AB	BB	BB	AB	AB	AB	BB	AB
1628	AX-89790562	AB	AB	AB	AB	AB	AB	AB	BB	AA	AB	AB	AA	AB	BB	AA	AA	AA	AA	AB	AA	AB	AB	AA	AA	AA	AA	AB	AA	BB	AB	AB	AB	AB	AA	AB	AB		AB	AA	AA	AA	AB	AB	NC	AA	AA	AB	AA
1629	AX-89790567	AB	AB	AB	AB	AB	AB	AB	AB	BB	AB	AB	BB	AB	BB	BB	NC	BB	BB	AB	BB	AB	AB	BB	BB	BB	BB	AB	BB	AA	AB	AB	AB	AB	AA	AB	AB		AB	BB	BB	BB	AB	AB	BB	BB	BB	AB	BB
1630	AX-89831134	BB	AB	AB	BB	AB	BB	AB	BB	BB	BB	AB	BB	AA	NC	BB	BB	BB	BB	AB	BB	AB	AB	BB	BB	BB	BB	AB	BB	AA	AB	AB	AB	AB	BB	BB	AB		AB	BB	BB	BB	AB	AB	BB	BB	BB	AB	BB
1631	AX-89831012	AA	BB	BB	AB	BB	BB	BB	BB	BB	AA	BB	BB	BB	AB	BB	BB	BB	BB	BB	BB	BB	BB	BB	BB	BB	BB	BB	BB	BB	NC	BB	BB	BB	NC	AB	BB		BB	BB	BB	BB	BB	BB	BB	BB	BB	BB	BB
1632	AX-89848914	AB	AB	BB	AB	AB	AB	AB	AA	AB	AB	AB	BB	BB	NC	BB	AB	AA	AB	BB	AA	BB	AA	AB	AA	AB	NC	AB	BB	AA	AB	AB	BB	AB	AB	AB	AB		BB	BB	NC	BB	BB	BB	NC	NC	BB	BB	BB
1633	AX-89848927	BB	AB	BB	AB	AB	AB	AB	AA	AB	AB	AB	BB	AB	NC	BB	AB	AA	BB	BB	AA	BB	AA	AB	AB	AB	BB	AB	BB	AA	AB	AB	BB	AB	AB	AB	AB		BB	BB	BB	BB	BB	BB	NC	NC	BB	BB	BB
1634	AX-89792444	BB	AB	BB	BB	AB	BB	AB	BB	BB	BB	AB	BB	AB	NC	BB	BB	AB	AB	BB	AB	BB	AB	BB	AB	AB	BB	AB	BB	AB	AB	AB	BB	BB	BB	BB	AB		BB	BB	BB	BB	BB	BB	NC	NC	BB	BB	BB
1635	AX-89905795	BB	BB	AB	BB	BB	BB	AB	BB	AA	AB	BB	BB	BB	BB	AB	AA	AB	AB	AB	AB	AA	AB	BB	BB	BB	AB	BB	AB	AB	BB	BB	AB	BB	BB	BB	AB		AB	BB	BB	AB	BB	BB	BB	AB	BB	AB	AB
1636	AX-89848811	BB	BB	AB	BB	BB	BB	AB	BB	AA	BB	BB	BB	BB	NC	AB	AA	AB	AB	AB	AB	AA	AB	BB	BB	BB	AB	BB	AB	AB	BB	BB	AB	BB	BB	BB	AB		AB	BB	BB	AB	BB	BB	BB	AB	BB	AB	AB
1637	AX-89905413	BB	AB	BB	AB	AB	BB	AB	AB	BB	AA	AB	BB	AB	BB	BB	BB	AB	AB	BB	AB	BB	AB	BB	AB	AB	BB	AB	BB	AB	AB	AB	BB	BB	AB	AB	AB		BB	BB	BB	BB	BB	BB	NC	NC	BB	BB	BB
1638	AX-89833293	AA	BB	BB	AA	BB	AA	BB	AA	AB	AA	BB	BB	BB	AA	BB	BB	BB	BB	BB	BB	AB	BB	BB	BB	BB	AB	BB	AB	BB	NC	BB	AB	BB	AA	AA	BB		BB	BB	BB	BB	BB	BB	BB	BB	BB	BB	BB
1639	AX-89833277	AB	AA	AA	AB	AA	AA	AA	AA	AB	AB	AA	AA	AA	BB	AA	AA	AA	AA	AA	AA	AB	AA	AA	AB	AA	AB	AA	AB	AA	NC	AA	AB	AA	AB	AB	AA		AA	AA	AA	AA	AA	AA	AA	AA	AA	AA	AA
1640	AX-89833166	AA	AA	AB	AB	AB	AB	AB	BB	AA	AB	AB	AB	AA	AB	AB	AB	AA	BB	AB	AA	AA	AA	AB	AA	AB	AA	AB	AA	AA	AB	AB	AA	AB	AB	AB	AB		AB	AB	AA	BB	AA	AB	AA	AB	BB	BB	AB
1641	AX-89833254	BB	BB	AB	AB	AB	AB	AB	BB	BB	AA	AB	AB	BB	AB	AB	AB	BB	AA	NC	BB	BB	BB	AB	BB	AB	BB	AB	BB	BB	AB	AB	BB	AA	AA	AB	AB		AB	AB	BB	AA	BB	AB	BB	AB	AB	AA	AB
1642	AX-89833164	AA	BB	BB	AA	BB	AB	BB	AA	AB	AA	BB	BB	BB	AA	BB	BB	BB	BB	BB	BB	AB	BB	BB	BB	BB	AB	BB	AB	BB	BB	BB	AB	BB	AA	AA	BB		BB	BB	BB	BB	BB	BB	BB	BB	BB	BB	BB
1643	AX-89807784	BB	AA	AB	AB	AB	AB	AB	BB	AA	AB	AB	AB	AA	BB	AB	AB	AA	BB	AB	AA	AA	AA	AB	AA	AB	AA	AB	AA	AA	AB	AB	AA	BB	BB	BB	AB		BB	AB	AA	BB	AA	AB	AA	AB	AB	BB	BB
1644	AX-89792270	AA	BB	AB	AA	AB	AA	AB	AA	AB	AA	AB	AB	AA	NC	AB	AB	BB	AB	AB	BB	AA	BB	AA	BB	AB	AB	AB	AB	BB	AB	AB	AB	AB	AA	AA	AB		AB	AB	BB	AA	BB	AB	BB	AB	AA	AA	AB
1645	AX-89892599	AB	AB	AB	AA	BB	AA	BB	AA	AB	AA	BB	BB	AB	AA	BB	BB	BB	BB	BB	BB	AB	BB	BB	BB	BB	AB	BB	AB	BB	NC	BB	AB	BB	AB	AB	BB		BB	AB	BB	BB	AB	AB	AB	BB	BB	BB	BB
1646	AX-89832846	AB	AA	AA	AB	AA	BB	AA	AA	AB	AB	AA	AA	AB	BB	AA	AA	AA	AA	AA	AA	AB	AA	AA	AA	AA	AB	AA	AB	AA	NC	AA	AB	AA	BB	AB	AA		AA	AA	AA	AA	AA	AA	AA	AA	AA	AA	AA
1647	AX-89792521	BB	AA	AA	BB	AA	BB	AA	AB	AB	BB	AA	AA	AB	NC	AA	AA	AA	AA	AA	AA	BB	AA	AA	AA	AA	AB	AA	AB	AA	AA	AA	BB	AA	BB	BB	AA		AA	AA	AA	AA	AA	AA	AA	AA	AA	AA	AA
1648	AX-89905534	AA	BB	AB	AA	AB	AA	AB	AA	AA	AA	AB	AB	BB	AA	AB	AA	AB	AB	AB	AB	AA	AB	NC	BB	AB	AB	AB	AB	AB	AB	AB	AB	AA	AA	AA	AB		AB	AB	BB	AA	BB	AB	BB	AB	AB	AA	AB
1649	AX-89848804	AA	BB	AB	AA	AB	AA	AB	AA	AA	AA	AB	AB	BB	NC	AB	AA	AB	AB	AB	AB	AA	AB	AA	BB	AB	AB	AB	AB	AB	AB	AB	AB	AA	AA	AA	AB		AB	AB	BB	AA	BB	AB	BB	AB	AB	AA	AB
1650	AX-89905431	AA	AB	AA	AA	BB	AA	AB	AA	AA	AA	BB	BB	AB	AA	AB	AA	AB	AB	AB	AB	AA	AB	BB	BB	BB	AB	BB	AB	AB	BB	BB	AB	AB	AA	AA	AB		AB	NC	AB	NC	AB	NC	AB	AB	NC	NC	AB
1651	AX-89905422	BB	AA	AB	BB	AA	BB	AB	BB	BB	BB	AA	AA	AB	BB	AB	BB	AB	AB	AB	AB	BB	AB	AA	AA	AA	AB	AA	AB	AB	AA	AA	AB	AA	BB	BB	AB		AB	AA	AB	AB	AA	AA	AA	AB	AA	AB	AB
1652	AX-89832504	AA	AB	AA	AA	BB	AA	AB	AA	AA	AA	BB	AB	AB	NC	AA	AA	AB	NC	AA	AB	AA	AB	BB	AB	BB	AA	BB	AA	AB	BB	BB	AA	BB	AA	AA	AB		AA	AB	AA	AB	AA	AB	AB	AB	AB	AB	AA
1653	AX-89848806	AB	AA	AB	AA	AA	AA	AB	AA	BB	AA	AA	AA	AA	NC	AB	BB	AB	AB	AB	AB	BB	AB	AA	AB	AA	AB	AA	AB	AB	AA	AA	AB	AA	AA	AA	AB		AB	AA	AA	AB	AA	AA	AA	AB	AA	AB	AB
1654	AX-89890645	BB	BB	AB	BB	BB	BB	AB	BB	AA	BB	BB	BB	BB	BB	AB	AA	AB	AB	AB	AB	AA	AB	BB	BB	BB	AB	BB	AB	AB	BB	BB	AB	BB	BB	BB	AB		AB	BB	BB	AB	BB	BB	BB	AB	BB	AB	AB
1655	AX-89905424	AB	BB	AB	AA	BB	AB	AB	AB	AA	AA	BB	BB	BB	AB	AB	AA	AB	AB	AB	AB	AA	AB	BB	BB	BB	AB	BB	AB	AB	BB	BB	AB	BB	AB	AB	AB		AB	BB	BB	AB	BB	BB	BB	AB	BB	AB	AB
1656	AX-89833519	BB	AB	AB	BB	AA	BB	AA	BB	AB	BB	AA	AB	AB	NC	AB	AA	AA	AA	AA	AA	BB	AA	AA	AB	AA	BB	AA	BB	AA	AA	AA	BB	AA	BB	BB	AA		AB	AB	AB	AA	BB	AB	AB	AA	AA	AA	AB
1657	AX-89861638	BB	AB	AB	BB	AA	AB	AA	AB	AB	BB	AA	AB	AB	AA	AB	AA	AA	AA	AA	AA	BB	AA	AA	AB	AA	BB	AA	BB	AA	AA	AA	BB	AA	AB	BB	AA		AB	AB	AB	AA	BB	AB	AB	AA	AA	AA	AB
1658	AX-89890753	BB	AA	NC	BB	AA	BB	AA	BB	AB	BB	AA	AA	AB	NC	AA	AA	AA	AA	AA	AA	BB	AA	AA	AA	AA	AB	AA	AB	AA	AA	AA	AB	AA	BB	BB	AA		AA	AA	AA	AA	AA	AA	AA	AA	AA	AA	AA
1659	AX-89792507	BB	AA	AA	BB	AA	BB	AA	BB	AB	AB	AA	AA	AB	BB	AA	AA	AA	AA	AA	AA	BB	AA	AA	AA	AA	AB	AA	AB	AA	NC	AA	AB	AA	BB	BB	AA		AA	AA	AA	AA	AA	AA	AA	AA	AA	AA	AA
1660	AX-89833626	AB	AB	AB	BB	BB	AB	AB	AB	AB	BB	BB	AB	AB	AB	AB	AB	AB	BB	BB	BB	BB	BB	BB	AB	BB	AB	BB	BB	AB	AB	BB	AB	BB	BB	AB	BB		AB	AB	AB	BB	AA	AB	BB	BB	BB	BB	AB
1661	AX-89849112	BB	AB	AB	BB	BB	AB	AB	AB	BB	BB	BB	AB	AB	AB	AB	AB	AB	BB	BB	BB	BB	BB	BB	AB	BB	AB	BB	BB	AB	AB	BB	AB	BB	AB	AB	BB		AB	AB	AB	BB	NC	AB	BB	BB	BB	BB	AB
1662	AX-89834029	AB	AB	AB	BB	BB	AB	AA	AB	BB	AB	BB	AB	AB	AB	AB	AB	AB	BB	BB	BB	BB	BB	BB	AB	BB	AB	BB	BB	AB	AB	BB	AB	BB	AB	AB	BB		AB	AB	AB	BB	AA	AB	BB	BB	BB	BB	AB
1663	AX-89908687	AA	AB	AB	AA	AA	AB	AB	AA	AA	AA	AA	AB	AB	AA	AB	AB	AB	AA	AA	AA	AA	AA	AA	AB	AA	AB	AA	AA	AB	AB	AA	AB	AA	AB	NC	AA		AB	AB	AB	AA	BB	AB	AA	AA	AA	AA	AB
1664	AX-89834233	BB	AB	AB	AB	AA	AB	AB	BB	AA	AB	AA	AB	AB	NC	AB	AA	AB	AA	AA	AA	AA	AA	AA	AB	AA	AB	AA	AA	AA	AB	AA	AB	AB	BB	AB	AA		AB	AB	AB	AA	BB	AB	AA	AA	AA	AA	AB
1665	AX-89833071	AB	AB	AB	AB	AA	AB	AB	AB	AA	AB	AA	AB	AB	NC	AB	AA	AB	AA	AA	AA	AA	AA	AA	AB	AA	AB	AA	AA	AA	AB	AA	AB	AA	AB	AA	AA		AB	AB	AB	AA	BB	AB	AA	AA	AA	AA	AB
1666	AX-89833065	AB	AB	AB	BB	BB	AA	AB	AB	BB	BB	BB	AB	NC	AA	AB	BB	AB	BB	BB	BB	BB	BB	BB	AB	BB	AB	BB	BB	BB	AB	BB	NC	BB	AA	BB	BB		AB	AB	AB	BB	AA	AB	BB	BB	BB	BB	AB
1667	AX-89833473	BB	AB	AB	AA	BB	AB	AB	BB	BB	AB	BB	AB	AB	BB	AB	BB	AB	BB	BB	BB	BB	BB	BB	AB	BB	AB	BB	BB	BB	AB	BB	AB	BB	AB	AA	BB		AB	AB	AB	BB	NC	AB	BB	BB	BB	BB	AB
1668	AX-89833456	BB	BB	BB	AB	AB	AB	BB	BB	AB	AB	BB	BB	AB	AB	BB	BB	BB	AB	BB	BB	AB	BB	AB	BB	BB	AB	BB	BB	BB	BB	BB	AB	BB	AB	AB	BB		BB	BB	NC	BB	BB	BB	BB	BB	BB	BB	BB
1669	AX-89792465	AB	BB	BB	AB	AB	BB	BB	AA	AB	BB	BB	BB	AB	AB	BB	BB	BB	AB	BB	BB	AB	BB	AB	BB	BB	AB	BB	BB	BB	BB	BB	AB	BB	BB	AB	BB		BB	BB	NC	BB	BB	BB	BB	BB	BB	BB	BB
1670	AX-89834316	BB	AB	AB	BB	AA	AB	AB	BB	AA	AB	AA	AB	AB	BB	AB	AA	AB	AA	AA	AA	AA	AA	AA	AB	AA	AB	AA	AA	AA	AB	AA	AB	AA	BB	BB	AA		AB	AB	AB	AA	BB	AB	AA	AA	AA	AA	AB
1671	AX-89861722	AB	AB	AB	AB	BB	AB	AB	AA	BB	AB	BB	AB	AB	AB	AB	BB	AB	BB	BB	BB	BB	BB	BB	AB	BB	AB	BB	BB	BB	AB	BB	AB	BB	AB	AB	BB		AB	AB	AB	BB	AA	AB	BB	BB	BB	BB	AB
1672	AX-89891533	AB	BB	BB	AB	AB	BB	BB	AB	AB	AB	BB	BB	BB	BB	BB	BB	BB	AB	BB	BB	AB	BB	BB	BB	BB	AB	BB	BB	BB	BB	BB	AB	BB	AB	AB	BB		BB	BB	BB	BB	BB	BB	BB	BB	BB	BB	BB
1673	AX-89807877	AA	AA	AA	AA	AB	AA	AA	AA	AB	AA	AA	AA	AA	AA	AA	AA	AA	AB	AA	AA	AB	AA	AA	AA	AA	AB	AA	AA	AA	AA	AA	AB	AA	AA	AA	AA		AA	AA	AA	AA	AA	AA	AA	AA	AA	AA	AA
1674	AX-89861696	BB	AB	AB	BB	BB	BB	AB	AB	BB	BB	BB	AB	AB	AB	AB	BB	AB	BB	BB	BB	BB	BB	BB	AB	BB	AB	BB	BB	BB	AB	BB	AB	BB	BB	BB	BB		AB	AB	AB	BB	AA	AB	BB	BB	BB	BB	AB
1675	AX-89849247	AB	AB	BB	BB	AB	BB	AB	BB	AA	AB	AB	AA	AA	AB	AB	AB	AB	AB	AA	AA	AA	AA	AA	AA	AA	AA	AA	AA	AB	NC	AA	AA	AB	AB	BB	AA		NC	NC	NC	NC	NC	NC	NC	NC	NC	NC	NC
1676	AX-89834846	AA	AA	AA	AB	AB	AB	AA	AA	AB	AA	BB	BB	AB	NC	AB	AA	AA	AA	AB	AB	AB	AB	BB	AB	AB	AB	AB	BB	AB	AB	AB	AB	BB	AA	NC	AB		AB	AB	NC	AB	AB	AB	AB	AB	AB	AB	AB
1677	AX-89793514	AB	AB	NC	AA	AB	AA	AB	AB	AA	AB	AB	AA	AA	AA	AB	AB	AB	NC	AA	AA	AA	AA	AA	AA	AA	AA	AA	AA	AB	NC	AA	AA	AB	AA	AB	AA		AA	AA	AA	AA	AA	AA	AA	AA	AA	AA	AA
1678	AX-89793446	AB	BB	BB	AA	BB	AB	AB	AB	AB	AB	AA	AA	AA	AB	AB	BB	BB	BB	AB	AB	AB	AB	AA	AB	AB	AB	AB	AA	AB	AB	AA	AB	AA	BB	BB	AB		AB	AB	NC	AB	AB	AB	AB	AB	AB	AB	AB
1679	AX-89793486	AA	AA	AA	AA	AB	AA	AA	AA	AB	AA	BB	BB	NC	NC	AB	AA	AA	AA	AB	AB	BB	AB	BB	AB	AB	AB	AB	BB	AB	NC	BB	BB	BB	AA	AA	AB		AB	AB	AB	AB	AB	AB	AB	AB	AB	AB	AB
1680	AX-89834736	BB	AA	AA	BB	AA	BB	AB	BB	AB	BB	BB	BB	BB	NC	AB	AA	AA	AA	AB	AB	BB	AB	BB	AB	AB	AB	AB	BB	AB	AB	BB	BB	BB	BB	BB	AB		AB	AB	NC	AB	AB	AB	AB	AB	AB	AB	AB
1681	AX-89849208	AB	BB	BB	BB	BB	BB	BB	BB	BB	BB	BB	BB	BB	BB	BB	BB	BB	BB	BB	BB	BB	BB	BB	BB	BB	BB	BB	BB	BB	NC	BB	BB	BB	AB	AB	BB		BB	BB	BB	BB	BB	BB	BB	BB	BB	NC	BB
1682	AX-89849202	BB	AA	AA	BB	AA	AA	AA	BB	AA	BB	AA	NC	BB	AB	AA	AA	AA	AA	AA	AA	AA	AA	AA	AA	AA	AB	AB	AA	AA	NC	AA	AA	AA	BB	AB	AA		AA	AA	AA	AA	AA	AA	AA	AA	AA	AA	AA
1683	AX-89849206	AA	NC	AA	AA	AA	NC	AB	BB	AB	AA	BB	BB	BB	NC	AB	AA	AA	AA	AB	AB	BB	AB	BB	AB	AB	AB	AB	BB	AB	AB	BB	BB	BB	AA	BB	AB		AB	AB	NC	AB	AB	AB	AB	AB	AB	AB	AB
1684	AX-89849203	AA	BB	BB	AA	BB	AA	AB	AA	AB	AA	AA	AA	AA	NC	AB	NC	BB	BB	AB	AB	AA	AB	AA	AB	AB	AB	AB	AA	AB	AB	AA	AA	AA	AA	AA	AB		AB	AB	NC	AB	AB	AB	AB	AB	AB	AB	AB
1685	AX-89849307	AB	AA	AA	BB	AA	BB	AB	BB	AB	BB	BB	BB	BB	NC	AB	AA	AA	AA	AB	AB	BB	AB	BB	AB	AB	BB	AB	BB	AB	AB	BB	BB	BB	BB	BB	AB		AB	AB	NC	AB	AB	AB	AB	AB	AB	AB	AB
1686	AX-89835259	AA	AA	AA	AA	AA	AA	AB	AA	AB	AA	BB	BB	BB	NC	AB	AA	AA	AA	AB	AB	BB	AB	BB	AB	AB	BB	AB	BB	AB	AB	BB	BB	BB	AA	AA	AB		AB	AB	NC	AB	AB	AB	NC	NC	AB	NC	AB
1687	AX-89835186	BB	BB	AB	BB	BB	BB	AB	BB	BB	BB	AA	AB	AA	AB	AB	BB	BB	BB	BB	BB	AA	AB	AB	BB	BB	NC	BB	AB	AB	BB	AA	AB	AA	BB	BB	BB		AB	AB	AA	AB	AB	AB	BB	BB	AB	BB	AB
1688	AX-89832933	AA	BB	BB	AA	BB	BB	BB	AA	BB	AA	BB	BB	BB	AB	BB	BB	BB	BB	BB	BB	AB	BB	BB	BB	BB	BB	BB	BB	BB	NC	BB	BB	AB	AA	AB	BB		BB	BB	BB	BB	BB	BB	BB	BB	BB	BB	BB
1689	AX-89849287	AA	BB	BB	AB	BB	AB	BB	BB	BB	AA	BB	BB	BB	AB	BB	BB	BB	BB	BB	BB	AA	BB	BB	BB	BB	BB	BB	BB	BB	NC	BB	AB	BB	AB	BB	BB		BB	BB	BB	BB	BB	BB	BB	BB	BB	BB	BB
1690	AX-89793822	AB	BB	BB	BB	BB	BB	BB	AB	BB	AB	BB	BB	BB	BB	BB	BB	BB	BB	BB	BB	BB	BB	BB	BB	BB	BB	BB	BB	BB	NC	BB	BB	BB	AB	AA	BB		BB	BB	BB	BB	BB	BB	BB	BB	BB	BB	BB
1691	AX-89793759	AA	AA	AA	AA	AA	AA	AB	AA	AB	AA	BB	AB	BB	NC	AA	AA	AA	AA	AB	AA	AB	AB	AB	AB	AB	AB	AB	AB	AB	AB	BB	AB	AB	AA	AA	AB		AA	AB	AB	AB	AA	AA	AA	AA	AB	AA	AA
1692	AX-89792120	BB	BB	BB	BB	NC	BB	AB	AB	BB	AB	AA	BB	AA	AB	BB	BB	BB	BB	BB	BB	AB	BB	BB	BB	BB	BB	BB	AB	AB	AB	AA	BB	AA	BB	BB	BB		BB	NC	NC	NC	BB	BB	BB	BB	NC	BB	BB
1693	AX-89807905	AA	AA	AA	AA	AA	AA	AB	AA	AB	AB	AB	AB	BB	AA	AA	AA	AA	AA	AB	AA	AB	AB	AB	AB	AB	AB	AB	BB	AA	BB	AB	AA	AB	AA	AA	AA		AA	AB	AB	AB	AA	AA	AA	AA	AB	AA	AA
1694	AX-89807909	AA	AA	AA	AA	AA	AA	AB	AA	AB	AA	AB	AB	BB	AA	AA	AA	AA	AA	AB	AA	BB	AB	NC	AB	AB	AB	AB	BB	AA	BB	AB	AB	AB	AA	AA	AA		AA	AB	AB	AB	AA	AA	AA	AA	AB	AA	AA
1695	AX-89849273	AB	AA	AA	AA	AA	AB	AA	AA	AA	AB	AA	AA	AA	AA	AA	AA	AA	AA	AA	AA	AB	AA	AA	AA	AA	AA	AA	AA	AA	NC	AA	AB	AA	AB	AB	AA		AA	AA	AA	AA	AA	AA	AA	AA	AA	AA	AA
1696	AX-89791628	AA	AB	BB	AB	AB	AA	AB	AA	BB	AA	BB	AA	AB	NC	AA	AB	AA	AB	AB	AB	BB	AB	AB	BB	AA	AB	AB	AB	BB	AA	AB	BB	AB	AA	AB	AB		AB	NC	NC	AB	AB	AB	NC	NC	AB	NC	AB
1697	AX-89832478	BB	BB	AB	BB	BB	BB	AB	BB	BB	BB	BB	BB	BB	NC	BB	BB	BB	AB	BB	AB	BB	BB	BB	NC	BB	BB	BB	BB	BB	BB	BB	BB	AB	BB	BB	BB		BB	BB	BB	BB	AB	BB	AB	AB	AB	BB	AB
1698	AX-89793192	AA	AB	AB	AA	AA	AA	AA	AA	BB	AA	AA	AA	AA	NC	AA	AB	AA	AA	AA	AA	AA	AB	AA	AB	AA	AB	AA	AA	AB	AA	AA	AA	AA	AA	AA	AA		AB	AB	AA	AB	AA	AB	AA	AA	AA	AB	AA
1699	AX-89834146	BB	AB	AB	BB	AB	NC	AB	BB	BB	BB	BB	AA	AB	BB	AA	BB	AA	AB	AA	AA	BB	AB	AB	BB	AA	AB	AB	AB	BB	AB	AB	BB	AA	AB	AA	AB		AB	NC	AA	AB	AA	AB	AB	AB	AA	NC	AA
1700	AX-89834854	BB	AA	AA	BB	AA	BB	AA	BB	AB	BB	AA	AA	NC	NC	AA	AA	AA	AA	AA	AA	AA	AA	AA	AA	AA	AA	AA	AA	AA	AA	AA	AA	AA	BB	BB	AA		AA	AA	AA	AA	AA	AA	AA	AA	AA	AA	AA
1701	AX-89793394	AA	BB	BB	BB	BB	AA	BB	AB	BB	AB	BB	BB	BB	AB	BB	BB	BB	BB	BB	BB	BB	BB	BB	BB	BB	BB	BB	BB	BB	NC	BB	BB	BB	AB	AB	BB		BB	BB	BB	BB	BB	BB	BB	BB	BB	BB	BB
1702	AX-89793540	BB	BB	BB	BB	AB	BB	AB	BB	BB	BB	AB	BB	AB	BB	BB	BB	BB	BB	BB	BB	AB	BB	AB	AB	BB	BB	AB	AB	AB	NC	AB	AB	BB	BB	BB	AB		BB	NC	BB	BB	BB	BB	NC	NC	BB	NC	BB
1703	AX-89835398	AA	AB	AB	AB	AA	BB	AA	BB	BB	AB	AA	AA	AA	AA	AA	BB	AA	AB	AA	AA	AA	AB	AA	AB	AA	AB	AA	AA	AB	AB	AA	AB	AA	AB	AB	AA		AB	AB	AA	AB	AA	AB	AA	AA	AA	AB	AA
1704	AX-89835533	BB	AB	AB	AB	BB	BB	BB	AB	AA	AB	BB	BB	AB	BB	BB	AB	AB	AB	AB	AB	AB	AB	BB	AB	BB	AB	BB	BB	AB	AB	BB	AB	BB	BB	BB	AB		AB	AB	BB	AB	BB	AB	BB	BB	BB	AB	BB
1705	AX-89793998	AA	AA	AA	AA	AA	AA	AA	AA	AA	AA	AA	AA	AA	AA	AA	AA	AA	AA	AA	AA	AA	AA	AA	AA	AA	AA	AA	AA	AA	NC	AA	AA	AA	AA	AA	AA		AA	AA	AA	AA	AA	AA	AA	AA	AA	AA	AA
1706	AX-89793975	AA	AA	AA	AA	AA	AA	AA	AA	AA	AB	AA	AA	AA	AB	AA	AA	AA	AA	AA	AA	AA	AA	AA	AA	AA	AA	AA	AA	AA	NC	AA	AA	AA	AA	AA	AA		AA	AA	AA	AA	AA	AA	AA	AA	AA	AA	AA
1707	AX-89794257	BB	AB	BB	AB	AB	BB	AB	AB	AB	AA	AB	AB	AB	AB	BB	AA	AB	AB	AA	AA	AB	AB	AB	AA	AA	AB	AA	AA	AB	NC	AB	AA	BB	AB	AB	AA		BB	AB	BB	BB	BB	BB	AB	AB	BB	AB	BB
1708	AX-89807964	AA	AA	AB	AA	AA	AA	AB	AA	AB	AA	AA	AB	AB	AB	NC	AA	AA	AA	AA	AA	AA	AA	AB	AA	AA	AB	AB	AB	AA	NC	AB	AA	BB	AA	AA	AA		AB	AA	AB	AB	AB	AB	AB	AB	AB	AA	AB
1709	AX-89849091	AA	AB	AB	AA	AB	AA	AB	AA	AA	AA	AA	AB	AB	NC	AA	BB	AB	AB	AB	BB	AB	BB	AB	AB	BB	AA	AA	BB	AB	AB	AA	AB	AB	AA	AA	AB		AA	BB	AB	AA	AB	AB	AB	AB	AA	AA	BB
1710	AX-89793526	AB	BB	BB	AB	AB	AB	BB	AA	BB	AB	BB	BB	AB	AB	BB	BB	BB	BB	BB	BB	BB	BB	BB	BB	BB	BB	BB	BB	BB	NC	BB	BB	BB	BB	BB	BB		BB	BB	BB	BB	BB	BB	BB	BB	BB	BB	BB
1711	AX-89834799	BB	AA	AA	BB	AB	AB	AB	AA	AB	AB	AA	AB	AB	AB	AA	AB	AB	BB	AB	AB	AB	AB	AB	AB	AA	AA	AA	AB	AB	BB	AA	AB	AB	BB	BB	AA		AB	AB	AB	AA	AA	AB	AB	AB	AA	AA	AB
1712	AX-89891714	AB	BB	BB	AB	AB	AB	BB	AB	BB	BB	BB	BB	AB	AA	BB	BB	BB	BB	BB	BB	BB	BB	BB	BB	BB	BB	BB	BB	BB	NC	BB	BB	BB	AA	AA	BB		BB	BB	BB	BB	BB	BB	BB	BB	BB	BB	BB
1713	AX-89834505	AB	BB	BB	AA	AB	AB	BB	AA	BB	AB	BB	BB	AB	AA	BB	BB	BB	BB	BB	BB	BB	BB	BB	BB	BB	BB	BB	BB	BB	BB	BB	BB	BB	AA	AA	BB		BB	BB	BB	BB	BB	BB	BB	BB	BB	BB	BB
1714	AX-89833554	BB	AB	AB	BB	AB	BB	AB	AB	BB	BB	BB	AB	AB	BB	BB	AA	AB	AB	AB	AA	AB	AA	AB	AB	AA	BB	BB	AA	AB	AB	BB	AB	AB	AB	BB	AB		BB	AA	AB	BB	AB	AB	AB	AB	BB	BB	AA
1715	AX-89792508	AB	AB	AA	AA	AA	AA	AB	AA	AA	AA	AA	AB	AB	AB	AA	BB	AB	AB	AB	BB	AB	BB	AB	AB	BB	AA	AA	BB	AA	AB	AA	AB	AA	AA	AB	AB		AA	NC	AB	AA	AB	AB	AB	AB	AA	NC	NC
1716	AX-89792550	AB	AB	AB	AB	AB	AB	AB	BB	AA	AB	AA	AB	AB	AB	AA	BB	AB	AB	AB	BB	AB	BB	AB	AB	BB	AA	AA	BB	AB	AB	AA	AB	AB	AB	AB	AB		AA	BB	AB	AA	AB	AB	AB	AB	AA	AA	BB
1717	AX-89891196	AB	AB	AB	BB	AB	AB	AB	BB	BB	AB	BB	AB	AB	AB	BB	AA	AB	AB	AB	AA	AB	AA	AB	AB	AA	BB	AB	AA	AB	NC	BB	AB	AB	BB	AB	AB		BB	AA	AB	BB	AB	AB	AB	AB	BB	BB	AA
1718	AX-89792504	AB	AB	AB	AB	AB	AA	AB	BB	BB	AA	BB	AB	BB	AB	BB	AA	AB	AB	AB	AA	AB	AA	AB	AB	AA	BB	BB	AA	AB	AB	BB	AB	AB	AA	AB	AB		BB	AA	AB	BB	AB	AB	AB	AB	BB	NC	AA
1719	AX-89792755	AA	AB	AB	AA	AB	AB	AB	AA	BB	AA	BB	AB	NC	AA	BB	AA	AB	AB	AB	AA	AB	AA	AB	AB	AA	BB	BB	AA	AB	AB	BB	AB	AB	AA	AA	AB		BB	AA	AB	BB	AB	AB	AB	AB	BB	AB	AA
1720	AX-89792738	AA	AA	AA	AB	AB	AB	AA	AA	AA	AB	AA	AB	AB	AA	AA	AA	AA	AA	AA	AA	AB	AA	AB	AB	AA	AA	AA	AB	AA	AA	AA	AB	AA	AB	AB	AA		AA	AB	AA	AA	AA	AB	AB	AB	AA	AA	AB
1721	AX-89807839	AA	AA	AA	BB	AB	AB	NC	AB	AA	AB	AA	AB	AB	AB	AA	AA	AA	AA	AA	AA	AB	AA	AB	AB	AA	AA	AA	AB	AA	NC	AA	AB	AA	BB	BB	AA		AA	AB	AA	AA	AA	AB	AB	AB	AA	AA	AB
1722	AX-89833792	AB	AB	AB	BB	AB	AB	BB	BB	AA	AB	AB	BB	BB	AB	AA	BB	AB	AB	BB	BB	AB	BB	BB	AB	AB	AB	AB	BB	AB	AB	AB	AB	BB	AB	AB	BB		AB	BB	BB	AB	BB	AB	AB	AB	AB	BB	BB
1723	AX-89849010	AB	AB	AB	AB	AB	AB	BB	AB	AA	BB	AB	BB	BB	AB	AA	BB	AB	AB	BB	BB	AB	BB	BB	AB	AB	AA	AB	BB	AB	AB	AB	AB	BB	BB	BB	BB		NC	BB	BB	NC	BB	AB	AB	AB	NC	BB	BB
1724	AX-89834078	AA	AA	AA	AA	AA	BB	AB	AA	AA	AA	AA	AA	AA	AA	AA	AB	AB	AB	AB	AB	AA	AB	AA	AA	AA	AA	AA	AA	AB	AB	AA	AA	AB	AB	BB	AB		AA	AA	NC	AA	AA	AA	AA	AA	AA	AA	AA
1725	AX-89849121	BB	AB	AB	BB	AB	BB	BB	BB	AA	BB	AB	BB	BB	NC	AA	BB	AB	AB	BB	BB	AB	BB	BB	AB	AB	AB	AB	BB	AB	AB	AB	AB	BB	BB	BB	BB		AB	BB	BB	AB	BB	AB	AB	AB	AB	BB	BB
1726	AX-89834010	BB	AB	AB	AA	AA	AB	AB	AB	AA	BB	AA	AA	AA	AB	AA	BB	AB	AB	AB	BB	AA	BB	AA	AA	AB	AA	AA	AB	AB	AB	AA	AA	AB	AB	BB	AB		AA	AB	AB	AA	AB	AA	AA	AA	AA	AB	AB
1727	AX-89792957	AA	AB	AB	AA	AB	AB	AA	AB	BB	AA	AB	AA	AA	AB	AB	AA	AB	AB	AA	AA	AB	AA	AA	BB	AB	AB	AB	AA	AB	AB	AB	AB	AA	BB	BB	AA		AB	AA	AA	AB	AA	AB	AB	AB	AB	AA	AA
1728	AX-89804924	BB	BB	BB	BB	BB	BB	AB	BB	BB	BB	BB	BB	BB	BB	BB	AB	AB	AB	AB	NC	BB	AA	BB	NC	BB	BB	BB	BB	AB	AB	BB	BB	AB	BB	BB	AB		BB	BB	NC	BB	BB	BB	BB	BB	BB	BB	BB
1729	AX-89833078	BB	BB	AB	BB	AB	BB	BB	AB	AA	BB	AB	AA	BB	BB	AA	BB	AB	AB	BB	BB	BB	BB	AB	AA	AB	AB	AB	AB	AB	AB	AB	AB	AB	BB	BB	BB		AA	AB	AB	AA	AB	AA	AA	AA	AA	NC	AB
1730	AX-89792936	BB	BB	BB	BB	AB	AB	BB	AB	BB	BB	BB	AB	AB	AB	BB	BB	BB	BB	BB	BB	AB	BB	AB	AB	BB	BB	BB	AB	BB	BB	BB	AB	BB	AA	AA	BB		BB	AB	BB	BB	BB	AB	AB	AB	BB	BB	AB
1731	AX-89792794	AA	AA	AA	AA	AB	AB	AA	AB	AA	AB	AA	AB	AB	AA	AA	AA	AA	AA	AA	AA	AB	AA	AB	AB	AB	AA	AA	AB	AA	AA	AA	AB	AA	AB	BB	AA		AA	AB	AA	AA	AA	AB	AB	AB	AA	AA	AB
1732	AX-89792859	AB	AA	AA	BB	AA	AB	AA	AB	AA	AB	AA	AA	AB	BB	AA	AA	AA	AA	AA	AA	AA	AA	AA	AA	AA	AA	AA	AA	AA	NC	AA	AA	AA	BB	AA	AA		AA	AA	AA	AA	AA	AA	AA	AA	AA	AA	AA
1733	AX-89804895	AA	BB	BB	BB	AB	AA	BB	AA	BB	AA	BB	AB	AB	AA	BB	BB	BB	BB	BB	BB	AB	BB	AB	AB	BB	BB	BB	AB	BB	NC	BB	AB	BB	AA	AA	BB		BB	AB	BB	BB	BB	AB	AB	AB	BB	BB	AB
1734	AX-89833811	AB	BB	BB	AA	BB	AA	AB	BB	BB	AA	AB	BB	BB	BB	BB	BB	BB	BB	AB	BB	BB	BB	BB	BB	BB	BB	AB	BB	BB	NC	AB	BB	BB	AA	AA	AB		BB	BB	BB	BB	BB	BB	BB	BB	BB	NC	BB
1735	AX-89905496	BB	AB	AB	BB	AB	BB	AA	BB	BB	BB	AB	BB	AA	BB	BB	AA	AB	AB	AA	AA	AB	AA	AB	BB	AB	AB	AB	AB	AB	AB	AB	AB	AA	BB	BB	AA		BB	AB	AB	BB	AB	BB	BB	BB	BB	NC	AB
1736	AX-89834355	AB	BB	BB	AA	BB	AB	AB	AA	BB	AB	BB	BB	BB	AA	BB	AB	AB	AB	AB	AB	BB	AB	BB	BB	BB	BB	BB	BB	BB	AB	BB	BB	AB	AA	AA	BB		BB	BB	NC	BB	BB	BB	BB	BB	BB	BB	BB
1737	AX-89849193	AA	AB	AB	AA	AB	AA	BB	AA	AA	AA	AB	AA	BB	NC	AA	BB	AB	AB	BB	BB	AB	BB	AB	AA	AB	AB	AB	AB	AB	AB	AB	AB	BB	AA	AA	BB		AA	AB	AB	AA	AB	AA	AA	AA	AA	NC	AB
1738	AX-89834608	AA	AA	AA	AA	AA	AB	AB	AA	AA	AB	AA	AA	AA	AA	AA	AB	AB	AB	AB	AB	AA	AB	AA	AA	AA	AA	AA	AA	AA	AB	AA	AA	AB	AA	AA	AA		AA	AA	NC	AA	AA	AA	AA	AA	AA	AA	AA
1739	AX-89834461	AB	BB	BB	AA	BB	AB	NC	AA	AB	AB	BB	BB	BB	AA	BB	AB	AB	AB	AB	AB	BB	AB	BB	BB	BB	BB	BB	BB	BB	AB	BB	BB	AB	AA	AA	BB		BB	BB	NC	BB	BB	BB	BB	BB	BB	BB	BB
1740	AX-89834460	AA	AB	AB	AA	AB	AB	BB	AA	AB	AB	AB	AA	BB	AA	AA	BB	AB	AB	BB	BB	AA	BB	AB	AA	AB	AB	AB	AB	AB	AB	AB	AA	BB	AA	AA	BB		AA	AB	AB	AA	AB	AA	AA	AA	AA	NC	AB
1741	AX-89834459	AA	AB	AB	AA	AB	AB	AA	AA	AB	AB	AB	BB	AA	AA	BB	AA	AB	AB	AA	AA	BB	AA	AB	BB	AB	AB	AB	AB	AB	AB	AB	BB	AA	AA	AA	AA		BB	AB	AB	BB	AB	BB	BB	BB	BB	NC	AB
1742	AX-89849175	AB	AA	AA	BB	AA	BB	AB	BB	AB	BB	AA	AA	AA	AB	AA	AB	AB	AB	AB	AB	AA	AB	AA	AA	AA	AA	AA	AA	AA	AB	AA	AA	AB	AA	AB	AA		AA	AA	NC	AA	AA	AA	AA	AA	AA	AA	AA
1743	AX-89804957	BB	AB	AB	BB	AB	BB	BB	BB	AB	BB	AB	AA	BB	BB	AA	BB	AB	AB	BB	BB	AA	BB	AB	AA	AB	AB	AB	AB	BB	AB	AB	AA	BB	BB	BB	BB		AA	AB	AB	AA	AB	AA	AA	AA	AA	NC	AB
1744	AX-89849158	BB	AB	AB	BB	AB	BB	BB	AB	AB	BB	AB	AA	BB	BB	AA	BB	AB	AB	BB	BB	AA	BB	AB	AA	AB	AB	AB	AB	BB	AB	AB	AA	BB	BB	BB	BB		AA	AB	AB	AA	AB	AA	AA	AA	AA	NC	AB
1745	AX-89834850	BB	BB	AB	BB	BB	BB	AB	AB	AB	BB	AB	BB	BB	BB	BB	BB	AA	BB	AB	AB	AB	AB	BB	BB	BB	AB	BB	BB	AB	AB	AB	BB	AB	BB	BB	AB		AB	AB	BB	AB	AB	BB	BB	BB	BB	AB	AB
1746	AX-89833453	AB	AA	AA	AA	AB	AA	AA	AB	AA	AA	AB	AB	AB	NC	AA	AA	AA	AB	AA	AA	AB	AA	BB	AB	AB	AA	AA	AB	AA	AB	AA	AB	AA	AB	AB	AA		AA	AB	AB	AA	AA	AB	AB	AB	AB	AB	AA
1747	AX-89890300	AA	BB	BB	AA	AB	AB	AB	AA	BB	AA	AA	AB	AB	NC	NC	NC	BB	AB	AB	AB	AB	BB	AA	BB	AB	BB	AB	AB	BB	AB	AB	AB	AB	AA	AA	AB		BB	AB	AB	NC	BB	AB	AB	AB	AB	AB	AB
1748	AX-89793360	AB	AB	BB	AB	BB	AB	AB	BB	BB	AA	AB	BB	BB	AB	BB	BB	BB	BB	AB	AB	BB	AB	BB	BB	AB	BB	AB	BB	BB	BB	AB	BB	BB	AA	AA	AB		BB	BB	BB	BB	BB	BB	BB	BB	BB	BB	BB
1749	AX-89905539	AB	BB	BB	AA	AB	AB	BB	AB	BB	AB	AB	AB	AA	AB	BB	BB	BB	AB	BB	BB	AB	BB	AB	AB	AB	BB	BB	AB	BB	AB	BB	AB	BB	AB	AA	BB		BB	NC	NC	NC	BB	NC	NC	NC	NC	NC	BB
1750	AX-89834021	AA	BB	BB	AA	AB	AA	AB	AA	AB	AA	AB	AB	BB	AA	BB	AB	AB	BB	BB	AA	BB	BB	BB	NC	BB	NC	AA	BB	BB	NC	AB	AB	BB	AA	AA	AB		BB	BB	BB	BB	BB	BB	BB	BB	BB	AB	BB
1751	AX-89834022	BB	BB	BB	BB	BB	BB	BB	BB	BB	BB	AB	AB	AB	NC	BB	BB	AB	NC	BB	BB	AB	BB	AB	AB	NC	BB	BB	AB	BB	AB	BB	AB	BB	BB	BB	BB		BB	AB	AB	BB	BB	AB	AB	AB	AB	BB	BB
1752	AX-89792578	AB	AA	AA	AA	AB	BB	BB	AB	AA	AB	AB	AA	AB	AB	AB	AA	AB	AA	AA	AB	AA	AA	AA	NC	AA	AB	BB	AB	AA	AA	AB	AB	AA	BB	AB	AB		AA	AA	AA	AA	AA	AA	AA	AA	AA	NC	AA
1753	AX-89792739	BB	AA	AA	AB	AB	AB	AB	BB	AA	AB	AB	AA	AA	BB	AA	AA	AA	AA	AA	AB	AA	AA	AA	AA	AA	AA	AB	AA	AA	AA	AB	AB	AA	AB	AB	AB		AA	AA	AA	AA	AA	AA	AA	AA	AA	NC	AA
1754	AX-89833899	BB	BB	BB	AA	AB	AB	AB	AB	BB	BB	AB	BB	BB	AB	BB	BB	BB	BB	BB	AB	BB	BB	BB	BB	BB	BB	AB	BB	BB	BB	AB	AB	BB	AB	BB	AB		BB	BB	BB	BB	BB	BB	BB	BB	BB	NC	BB
1755	AX-89792798	BB	BB	BB	BB	BB	BB	AB	AA	BB	BB	AB	BB	BB	BB	BB	BB	BB	BB	BB	AB	BB	BB	BB	BB	BB	BB	AB	BB	BB	NC	AB	AB	BB	BB	BB	AB		BB	BB	BB	BB	BB	BB	BB	BB	BB	NC	BB
1756	AX-89833951	BB	BB	BB	AA	BB	AB	AB	AB	BB	BB	AB	BB	BB	BB	BB	BB	BB	BB	BB	AB	BB	BB	BB	BB	BB	BB	AB	BB	BB	BB	AB	AB	BB	AB	BB	AB		BB	BB	BB	BB	BB	BB	BB	BB	BB	NC	BB
1757	AX-89863906	BB	AA	AA	BB	AA	BB	AA	AB	AA	BB	AB	AB	AB	BB	AA	AA	BB	AA	AA	AA	AA	AA	BB	AB	AB	AA	AB	AA	AA	NC	AA	AB	AA	BB	BB	AA		AA	AB	NC	AA	AA	NC	NC	NC	NC	AA	AA
1758	AX-89833864	BB	BB	BB	BB	BB	BB	BB	AA	BB	BB	AB	AB	AB	BB	BB	BB	AB	BB	BB	BB	BB	BB	AB	AB	AB	BB	AB	BB	BB	NC	BB	AB	BB	BB	BB	BB		BB	AB	AB	BB	BB	AB	AB	AB	AB	BB	BB
1759	AX-89832802	AB	AA	AA	BB	AA	AB	AB	BB	AA	BB	AB	AA	AA	AB	AA	AA	AA	AA	AA	AB	AA	AA	AA	AA	AA	AA	AB	AA	AA	NC	AB	AB	AA	BB	BB	AB		AA	AA	AA	AA	AA	AA	AA	AA	AA	NC	AA
1760	AX-89892597	BB	BB	BB	AB	BB	AB	AB	AB	BB	BB	AB	BB	BB	AB	BB	BB	BB	BB	BB	AB	BB	BB	BB	BB	BB	BB	AB	BB	BB	BB	AB	AB	BB	BB	BB	AB		BB	BB	BB	BB	BB	BB	BB	BB	BB	NC	BB
1761	AX-89793899	AB	BB	BB	AB	BB	AA	AB	AA	BB	BB	AB	BB	BB	AA	BB	BB	BB	BB	BB	AB	BB	BB	BB	BB	BB	BB	AB	BB	BB	BB	AB	AB	BB	AA	AA	AB		BB	BB	BB	BB	BB	BB	BB	BB	BB	NC	BB
1762	AX-89792017	AB	BB	BB	AB	BB	AB	AB	AA	BB	AA	AB	AB	BB	AA	BB	BB	BB	BB	BB	AB	BB	BB	BB	BB	BB	BB	AB	BB	BB	BB	AB	AB	AB	AA	AB	AB		AB	BB	AB	AB	AB	AB	BB	BB	BB	AB	AB
1763	AX-89836419	AA	AA	AB	AB	NC	AB	AB	AA	AA	AB	AB	AB	BB	AA	AB	AB	BB	AB	BB	AB	AA	AB	BB	AB	AB	AA	AB	AB	AB	AA	AB	AB	AA	AB	AA	AB		AB	AB	AB	AA	AB	AB	AA	BB	AB	AA	AA
1764	AX-89836379	AB	AA	AB	AB	AA	BB	AB	AB	AA	BB	AB	AB	BB	AA	AB	AB	BB	AB	BB	AB	AA	AB	BB	AB	AB	AA	AB	AB	AB	AA	AB	AB	AA	AB	AB	AB		AB	AB	AB	AA	AB	AB	AA	BB	AB	AA	AA
1765	AX-89905410	AA	AA	AB	AA	AB	AB	AB	AB	AA	AB	AB	AB	BB	AA	BB	AA	BB	AB	AB	AB	AA	AB	BB	AB	AB	AA	AB	AB	AA	AA	AB	AB	AA	AA	AA	AA		AB	AB	AB	AA	AB	AB	AA	BB	AB	AA	AB
1766	AX-89905864	AA	BB	AB	AA	BB	AA	AB	AB	BB	AA	AB	AB	AA	AA	AA	BB	AA	AB	AB	AB	BB	AB	AA	AB	AB	BB	AB	AB	BB	BB	AB	AB	BB	AA	AA	BB		AB	AB	AB	BB	AB	AB	BB	AA	AB	BB	AB
1767	AX-89805109	BB	BB	AB	AB	AB	AB	AB	AB	BB	AB	AB	AB	AB	BB	AA	BB	AA	AB	AB	AB	BB	AB	AA	AB	AB	BB	AB	AB	BB	BB	AB	AB	BB	AB	AA	BB		AB	AB	AB	BB	AB	AB	BB	AA	AB	BB	AB
1768	AX-89836577	BB	BB	BB	AB	BB	AB	BB	BB	BB	AB	BB	BB	AB	BB	BB	BB	AB	BB	AB	BB	BB	BB	BB	BB	BB	BB	BB	BB	BB	BB	AB	BB	BB	AB	BB	BB		BB	BB	BB	BB	BB	BB	BB	BB	BB	BB	BB
1769	AX-89794410	AA	BB	BB	AB	AB	AB	BB	AA	AB	AB	BB	BB	BB	AB	BB	BB	AB	BB	AB	BB	BB	BB	BB	BB	BB	BB	BB	BB	BB	NC	AB	AB	BB	AA	AB	BB		BB	BB	BB	BB	BB	BB	BB	BB	BB	BB	BB
1770	AX-89794088	AB	BB	BB	BB	BB	AB	BB	BB	BB	BB	BB	BB	BB	AB	BB	BB	BB	BB	BB	BB	BB	BB	BB	BB	BB	BB	BB	BB	BB	NC	BB	BB	BB	BB	AB	BB		BB	BB	BB	BB	BB	BB	BB	BB	BB	BB	BB
1771	AX-89835644	AB	BB	BB	AB	BB	AB	BB	BB	BB	BB	BB	BB	BB	NC	BB	BB	BB	BB	BB	BB	BB	BB	BB	BB	BB	BB	BB	BB	BB	NC	BB	BB	BB	AB	BB	BB		BB	BB	BB	BB	BB	BB	BB	BB	BB	BB	BB
1772	AX-89835885	BB	BB	BB	AB	AB	AB	BB	BB	AB	AA	BB	BB	BB	BB	BB	BB	AB	BB	AB	BB	BB	BB	BB	AB	BB	BB	BB	BB	BB	NC	AB	AB	BB	AB	BB	BB		BB	BB	BB	BB	BB	BB	BB	BB	BB	BB	BB
1773	AX-89835629	AB	BB	BB	AB	BB	AB	BB	BB	BB	BB	BB	BB	BB	AB	BB	BB	BB	BB	BB	BB	BB	BB	BB	BB	BB	BB	BB	BB	BB	NC	BB	BB	BB	AA	BB	BB		BB	BB	BB	BB	BB	BB	BB	BB	BB	BB	BB
1774	AX-89893114	BB	BB	BB	AB	AB	AB	BB	BB	AB	BB	BB	BB	BB	AB	BB	BB	AB	BB	AB	BB	BB	BB	BB	NC	BB	BB	BB	BB	BB	NC	AB	AB	BB	BB	AB	BB		BB	BB	BB	BB	BB	BB	BB	BB	BB	BB	BB
1775	AX-89835732	AB	BB	BB	BB	AB	BB	AB	AA	AB	BB	AB	AB	BB	AB	BB	BB	AB	BB	NC	AB	BB	BB	BB	BB	AB	BB	BB	AB	BB	BB	AB	NC	BB	AB	AA	BB		BB	AB	AB	BB	BB	BB	BB	AB	AB	BB	BB
1776	AX-89835851	AA	BB	BB	AA	AB	NC	AB	AB	AB	AA	AB	AB	AB	AB	BB	BB	AB	BB	NC	AB	BB	BB	NC	NC	AB	BB	BB	AB	BB	BB	AB	NC	AB	AB	AB	BB		BB	AB	AB	BB	BB	BB	BB	AB	AB	BB	BB
1777	AX-89892773	AA	BB	BB	AA	BB	AB	BB	AA	BB	AA	BB	BB	BB	AA	BB	BB	BB	BB	BB	BB	BB	BB	BB	BB	BB	BB	BB	BB	BB	NC	BB	BB	BB	AA	AA	BB		BB	BB	BB	BB	BB	BB	BB	BB	BB	BB	BB
1778	AX-89793908	BB	BB	BB	BB	AB	AB	AB	AB	AB	BB	BB	BB	BB	AB	BB	AB	AA	AB	AA	AB	AB	BB	AB	AB	AB	BB	AB	BB	AB	BB	BB	AB	BB	NC	AB	AB		BB	BB	BB	BB	BB	BB	BB	BB	BB	BB	BB
1779	AX-89905702	BB	AA	AA	BB	AB	AB	AB	AB	AB	NC	AA	AA	AA	BB	AA	AB	BB	AB	BB	AB	AB	AA	AB	AB	AB	AA	AB	AA	AB	AA	AA	AB	AA	BB	BB	AB		AA	AA	AA	AA	AA	AA	AA	AA	AA	AA	AA
1780	AX-89792799	AA	BB	BB	AA	AB	AB	AB	AB	AB	AB	BB	BB	BB	AA	BB	AB	AA	AB	AA	AB	AB	BB	AB	AB	AB	BB	AB	BB	AB	BB	BB	AB	BB	AB	BB	AB		BB	BB	BB	BB	BB	BB	BB	BB	BB	BB	BB
1781	AX-89872655	AA	BB	BB	BB	AB	AA	AB	AB	AB	BB	BB	BB	BB	AA	BB	AB	AA	AB	AA	AB	AB	BB	AB	AB	AB	BB	AB	BB	AB	BB	BB	AB	BB	AA	AA	AB		BB	BB	BB	BB	BB	BB	BB	BB	BB	BB	BB
1782	AX-89792050	BB	AA	AA	BB	AB	BB	AB	BB	AB	BB	AA	AA	NC	BB	AA	AB	BB	AB	BB	AB	AB	AA	AB	AB	AB	AA	AB	AA	AB	AA	AA	AB	AA	BB	BB	AB		AA	AA	AA	AA	AA	AA	AA	AA	AA	AA	AA
1783	AX-89905884	BB	AA	AA	BB	AB	AB	AB	BB	AB	BB	AA	AA	AA	BB	AA	AB	BB	AB	BB	AB	AB	AA	NC	AB	AB	AA	AB	AA	AB	AA	AA	AB	AA	BB	BB	AB		AA	AA	AA	AA	AA	AA	AA	AA	AA	AA	AA
1784	AX-89794018	AA	AA	AA	AA	AB	AA	AB	AA	AB	AA	AA	AA	AA	AA	AA	AA	AB	AA	AB	AB	AA	AA	AB	AB	AB	AA	AB	AA	AA	AA	AA	AB	AA	AB	AB	AA		AA	NC	AA	AA	AA	AA	AA	NC	AA	AA	AA
1785	AX-89793996	BB	AA	AA	BB	AB	BB	AB	AB	AB	BB	AA	AA	AA	BB	AA	AB	AB	AA	BB	AB	AA	AA	AB	AB	AB	AA	AB	AA	AB	AA	AA	AB	AA	BB	BB	AB		AA	NC	AA	AA	AA	AA	AA	NC	AA	AA	AA
1786	AX-89793873	AA	BB	BB	AA	AB	AA	AB	AB	AA	AA	BB	BB	AB	AA	BB	AB	AA	AB	AA	AB	AB	BB	AB	AB	AB	BB	AB	BB	AB	BB	BB	AB	BB	AA	AA	AB		BB	BB	BB	BB	BB	BB	BB	BB	BB	BB	BB
1787	AX-89835821	AA	AA	AA	AA	AB	AA	AB	AA	AB	AA	AB	AB	AA	AA	AA	AA	AB	AA	AB	AB	AA	AA	AB	AB	AB	AA	AB	AB	AA	AA	AB	AB	AA	AA	AA	AA		AA	AB	AB	AA	AA	AA	AA	AB	AB	AA	AA
1788	AX-89794199	BB	AA	AA	AB	AA	AB	AA	AB	AA	AB	AA	AA	AA	BB	AA	AA	AA	AA	AA	AA	AA	AA	AA	AA	AA	AA	AA	AA	AA	NC	AA	AA	AA	AB	AA	AA		AA	AA	AA	AA	AA	AA	AA	AA	AA	AA	AA
1789	AX-89835882	AA	BB	BB	AA	BB	AA	BB	AB	BB	AB	BB	BB	BB	AB	BB	BB	BB	BB	BB	BB	BB	BB	BB	BB	BB	BB	BB	BB	BB	NC	BB	BB	BB	AB	BB	BB		BB	BB	BB	BB	BB	BB	BB	BB	BB	BB	BB
1790	AX-89836108	BB	BB	BB	BB	BB	BB	AB	BB	AB	BB	AB	AB	AB	BB	AB	AB	BB	AB	AB	AB	AB	BB	BB	BB	BB	BB	AB	BB	AB	BB	AB	BB	AB	BB	BB	AA		AB	BB	AB	AB	AB	AB	AB	BB	BB	AB	AB
1791	AX-89858245	AA	AA	AA	AA	AA	AA	AA	AA	AA	AB	AA	AA	AB	AA	AA	AB	AA	AA	AB	AA	AA	AA	AA	AA	AA	AA	AA	AA	AB	NC	AA	AA	AA	AB	AA	AB		AA	AA	AA	AA	AA	AA	AA	AA	AA	AA	AA
1792	AX-89836025	AA	AA	AA	AA	AA	AA	AA	AA	AA	AA	AA	AA	AB	AB	AA	AB	AA	AA	AB	AA	AA	AA	AA	AA	AA	AA	AA	AA	AB	NC	AA	AA	AA	AB	AB	AB		AA	AA	AA	AA	AA	AA	AA	AA	AA	AA	AA
1793	AX-89794470	BB	BB	BB	BB	BB	BB	AB	BB	AB	BB	AB	AB	AB	NC	AB	AB	BB	AB	AB	AB	AB	BB	BB	BB	BB	BB	AB	BB	AB	BB	AB	BB	AB	BB	BB	AA		AB	BB	AB	AB	AB	AB	AB	BB	BB	AB	AB
1794	AX-89810327	AB	BB	BB	BB	BB	BB	BB	BB	BB	BB	BB	BB	BB	BB	BB	BB	BB	BB	BB	BB	BB	BB	BB	BB	BB	BB	BB	BB	BB	NC	BB	BB	BB	BB	BB	BB		BB	BB	BB	BB	BB	BB	BB	BB	BB	BB	BB
1795	AX-89794507	AB	BB	BB	BB	BB	AB	BB	BB	BB	BB	BB	BB	BB	BB	BB	AB	BB	BB	AB	BB	BB	BB	BB	BB	BB	BB	BB	BB	AB	NC	BB	BB	BB	BB	BB	AB		BB	BB	BB	BB	BB	BB	BB	BB	BB	BB	BB
1796	AX-89836652	BB	AA	AA	AA	AA	BB	AA	AA	AA	AB	AA	AA	AA	AB	AA	AA	AA	AA	AA	AA	AA	AA	AA	AA	AA	AA	AA	AA	AA	NC	AA	AA	AA	AA	AB	AA		AA	AA	AA	AA	AA	AA	AA	AA	AA	AA	AA
1797	AX-89794726	AA	NC	AB	AA	AB	AA	AB	AA	AA	AA	AB	AB	BB	AA	AB	AB	BB	AB	BB	AB	AA	AB	BB	AB	AB	AA	AB	AB	AB	AA	AB	AB	AA	AA	AA	AB		AB	AB	AB	AA	AB	AB	AA	BB	AB	AA	AA
1798	AX-89848788	AB	BB	AB	AA	AB	AA	AA	AB	BB	AA	AA	AA	AB	AA	AA	BB	AA	AB	AB	AA	BB	AB	AA	AB	AB	BB	AA	AB	BB	BB	AA	BB	AB	AA	AA	AB		AA	AB	AA	AB	AA	AA	AB	AA	AB	AB	AA
1799	AX-89832240	BB	BB	AB	AB	AB	AB	AA	AB	BB	AB	AA	AA	AB	BB	AA	BB	AA	AB	AB	AA	BB	AB	AA	AB	AB	BB	AA	AB	BB	BB	AA	AB	AB	AB	AB	AB		AA	AB	AA	AB	AA	AA	AB	AA	AB	AB	AA
1800	AX-89791640	AB	BB	BB	AB	BB	AA	BB	AB	BB	AB	BB	BB	NC	BB	BB	BB	BB	BB	BB	BB	BB	BB	BB	BB	BB	BB	BB	BB	BB	NC	BB	BB	BB	AA	AB	BB		BB	BB	BB	BB	BB	BB	BB	BB	BB	BB	BB
1801	AX-89836975	AB	AA	AB	AB	AB	AA	BB	AB	AA	AA	BB	BB	AB	BB	BB	AA	BB	AB	AB	BB	AA	AB	BB	NC	AB	AA	BB	AB	AA	AA	BB	AB	AB	AB	AB	AB		BB	AB	BB	AB	BB	BB	AB	BB	AB	AB	BB
1802	AX-89795064	AA	BB	BB	AA	BB	AB	NC	BB	BB	BB	AB	AB	AB	AB	AB	BB	BB	BB	BB	AB	BB	BB	AB	BB	BB	BB	AB	BB	BB	NC	AA	AB	AB	AB	AA	AB		AB	BB	AB	AB	AB	AB	BB	BB	BB	AB	AB
1803	AX-89836804	BB	AB	AA	AB	AA	AB	AB	AB	AA	AB	AB	AB	BB	AA	AB	AA	AA	AA	AA	AB	AA	AB	AB	AA	AB	AA	AB	AA	AA	AA	BB	AB	AB	AA	BB	AB		AB	AA	AB	AB	AB	AB	AA	AA	AA	AB	AB
1804	AX-89804863	BB	BB	BB	BB	BB	BB	AB	BB	BB	BB	AB	BB	BB	BB	BB	BB	BB	BB	BB	AB	BB	BB	BB	BB	BB	BB	AB	BB	BB	NC	AB	AB	BB	AB	AB	AB		BB	BB	BB	BB	BB	BB	BB	BB	BB	NC	BB
1805	AX-89833995	AA	BB	BB	BB	BB	AB	AB	AB	BB	AA	AB	BB	BB	AB	BB	BB	BB	BB	BB	AB	BB	BB	BB	BB	BB	BB	AB	BB	BB	BB	AB	AB	BB	AB	AA	AB		BB	BB	BB	BB	BB	BB	BB	BB	BB	NC	BB
1806	AX-89833768	BB	BB	BB	AB	AB	BB	AB	AB	BB	AB	AB	BB	BB	AB	NC	BB	AB	BB	BB	AB	BB	BB	BB	BB	BB	BB	AB	BB	BB	BB	AB	AB	BB	AB	BB	AB		BB	BB	BB	BB	BB	BB	BB	BB	BB	NC	BB
1807	AX-89833731	AA	BB	BB	AA	AB	AA	AB	AA	BB	AA	AB	BB	BB	AA	BB	BB	AB	BB	BB	AB	BB	BB	BB	BB	BB	BB	AB	BB	BB	BB	AB	AB	BB	AA	AA	AB		BB	BB	BB	BB	BB	BB	BB	BB	BB	NC	BB
1808	AX-89905647	BB	AA	AA	BB	AB	BB	BB	BB	AA	BB	BB	AB	BB	NC	AB	AA	BB	AB	AB	AB	AB	AA	BB	AB	AB	AB	BB	BB	AA	AB	AB	BB	AA	AB	AB	AB		AA	AB	AB	AA	AA	AB	AB	AB	AB	AB	AA
1809	AX-89793002	AB	BB	BB	AB	BB	BB	AB	BB	BB	AB	AB	BB	BB	BB	BB	AB	AB	BB	AB	AB	BB	BB	BB	BB	BB	BB	AB	BB	BB	BB	AB	AB	BB	BB	BB	AB		BB	BB	BB	BB	BB	BB	BB	BB	BB	NC	BB
1810	AX-89833733	AA	AA	AA	AB	AA	AA	AA	AB	AA	AB	AB	AB	AB	AB	AA	AA	AB	AA	AA	AA	AA	AA	NC	AB	AB	AA	AA	AA	AA	AB	AA	AB	AA	AA	AA	AA		AA	AB	AB	AA	AA	AB	AB	AB	AB	AA	AA
1811	AX-89792665	BB	BB	BB	AB	BB	AB	BB	AB	BB	AB	AB	AB	AB	BB	BB	BB	AB	BB	BB	BB	BB	BB	AB	AB	AB	BB	BB	BB	BB	NC	BB	AB	BB	AB	AA	BB		BB	AB	AB	BB	BB	AB	AB	AB	AB	BB	BB
1812	AX-89833465	AA	BB	BB	AA	BB	AB	AB	BB	BB	AB	AB	BB	BB	AB	BB	BB	BB	BB	AB	AB	BB	BB	BB	BB	BB	BB	AB	BB	BB	BB	AB	BB	BB	AB	AA	AB		BB	BB	BB	BB	BB	BB	BB	BB	BB	BB	BB
1813	AX-89793263	AA	AB	AB	AA	AB	AA	AB	AB	AB	AA	AA	AB	AB	AA	AB	NC	AA	AB	AA	AA	AA	AB	AA	AB	AA	AA	AA	AA	AB	AA	AB	AB	AB	AA	AA	AB		AB	AA	AB	AB	AB	AA	AB	AB	AB	AB	AB
1814	AX-89793208	AA	AB	AB	AB	AB	AA	NC	AB	AB	AA	AA	AB	AB	AB	AB	BB	AA	AB	AA	AA	AA	AB	AA	AB	AA	AA	AB	AA	AB	AA	AB	AB	AB	AA	AA	AB		AB	AA	AB	AB	AB	AB	AB	AB	AB	AB	AB
1815	AX-89834766	BB	AB	BB	BB	AA	AB	AB	BB	AB	AB	AB	NC	AB	BB	AB	AB	BB	AA	BB	BB	AA	BB	AB	AA	BB	BB	AB	AB	AB	AB	AB	AA	AB	BB	BB	AB		AB	AB	NC	AB	AB	AB	AB	AB	AB	AB	AB
1816	AX-89793374	BB	BB	AB	BB	AB	BB	BB	AB	BB	BB	BB	BB	NC	NC	AB	AB	BB	AB	AB	AB	BB	BB	AB	BB	AB	AB	AB	AB	BB	BB	BB	BB	BB	BB	BB	BB		BB	BB	BB	BB	BB	AB	AB	AB	AB	BB	BB
1817	AX-89835261	AB	BB	AB	AB	AA	BB	BB	AB	AB	AA	AB	AB	AB	BB	BB	AA	BB	AB	AB	AB	AB	BB	AA	AB	BB	BB	BB	AB	BB	AB	BB	AB	BB	AA	AA	BB		BB	AB	AB	BB	BB	AA	AA	AA	AA	AB	BB
1818	AX-89793367	AB	BB	BB	BB	BB	AB	BB	BB	BB	AB	BB	BB	BB	AA	AB	BB	BB	BB	BB	BB	BB	BB	BB	BB	AB	AB	AB	AB	BB	NC	BB	BB	BB	BB	AB	BB		BB	BB	BB	BB	BB	BB	BB	BB	BB	BB	BB
1819	AX-89835311	AB	AB	BB	AB	AB	AB	NC	AB	AB	AA	AB	NC	AA	AB	AB	AB	BB	AB	BB	BB	AA	AB	AB	NC	BB	BB	AB	AB	AB	AB	AB	AA	AB	AA	AA	AB		AB	AB	NC	AB	AB	AB	AB	AB	AB	AB	AB
1820	AX-89793365	AB	AB	BB	AB	AB	AB	AB	BB	AB	AA	AB	AA	AA	AB	AB	AB	BB	AB	BB	BB	AA	AB	AB	AA	BB	BB	AB	AB	AB	AB	AB	AA	AB	AA	AA	AB		AB	AB	NC	AB	AB	AB	AB	AB	AB	AB	AB
1821	AX-89793745	AA	AB	AA	AA	AA	AA	AB	AB	AA	AA	AA	AB	NC	AA	AB	AA	AA	AA	AA	AA	AB	AB	AA	NC	AA	AB	AB	AA	AB	AA	AB	AB	AB	AA	AA	AB		AB	AA	AB	AB	AB	AA	AA	AA	AA	AA	AB
1822	AX-89792117	AA	BB	AB	AA	AB	AA	BB	AA	AB	AA	AB	AB	AB	NC	BB	NC	BB	AB	AB	AB	AB	BB	AA	NC	BB	BB	BB	AB	BB	AB	BB	AB	BB	AA	AA	BB		BB	AB	AB	BB	BB	AA	AA	AA	AA	AB	BB
1823	AX-89835119	AB	AB	BB	BB	BB	AB	AB	BB	BB	BB	BB	AB	AB	BB	AB	BB	BB	BB	BB	BB	AB	AB	BB	AB	BB	AB	AB	BB	AB	NC	AB	AB	AB	AB	AB	AB		AB	BB	AB	AB	AB	BB	BB	BB	BB	BB	AB
1824	AX-89793667	NC	BB	BB	AB	BB	AB	BB	AA	BB	AB	BB	BB	BB	AA	AB	BB	BB	BB	BB	BB	BB	BB	BB	BB	AB	BB	AB	AB	BB	NC	BB	BB	BB	AB	AA	BB		BB	BB	BB	BB	BB	BB	BB	BB	BB	BB	BB
1825	AX-89835115	AB	AB	AA	BB	AB	AB	BB	BB	AA	BB	AA	AA	AB	BB	AB	AA	BB	AA	AA	AA	AA	AB	AA	AA	AB	AB	AB	AA	AB	NC	BB	AA	AB	AB	AB	AB		NC	AA	AA	NC	NC	AA	AA	AA	AA	AA	NC
1826	AX-89804797	AA	AB	AB	NC	BB	AA	AB	NC	AB	AA	AB	BB	AB	BB	BB	BB	AB	AB	AB	AB	BB	AB	BB	BB	AB	AB	BB	BB	AB	NC	AB	BB	AB	BB	AB	AB		AB	AB	BB	AB	AB	BB	BB	BB	BB	AB	AB
1827	AX-89792125	BB	AB	AB	BB	AA	BB	AB	BB	AB	BB	AB	AA	AA	NC	AB	AA	BB	AB	AB	AB	AA	AB	AA	AA	BB	AB	AB	AB	AB	AB	AB	AA	AB	BB	BB	AB		AB	AB	AA	AB	AB	AA	AA	AA	AA	AB	AB
1828	AX-89835310	BB	AA	AB	BB	AB	BB	AA	AB	AA	BB	AA	AA	AB	BB	AA	AB	AA	AB	AB	AB	AA	AA	AB	AA	AA	AA	AA	AA	AA	AA	AA	AA	AA	BB	AB	AA		AA	AA	AA	AA	AA	AB	AB	AB	AB	AA	AA
1829	AX-89834636	BB	AB	BB	BB	AB	AB	AB	BB	AB	AB	AB	AA	AB	BB	AB	AB	BB	AB	BB	BB	AA	AB	AB	AA	BB	BB	AB	AB	AB	AB	AB	AA	AB	BB	BB	AB		AB	AB	NC	AB	AB	AB	AB	AB	AB	AB	AB
1830	AX-89793418	AB	AB	AB	AB	BB	AB	AB	AB	AB	AA	AB	BB	BB	AB	BB	BB	AA	BB	AB	AB	BB	AB	BB	BB	AB	AB	AB	BB	AB	AB	AB	BB	AB	AA	AA	AB		AB	AB	BB	AB	AB	BB	BB	BB	BB	AB	AB
1831	AX-89834718	AA	AB	BB	AA	AA	AA	AB	AA	AB	AA	AB	AA	AB	NC	AB	AB	BB	AA	BB	BB	AA	BB	AB	NC	BB	BB	AB	AB	AB	AB	AB	AA	AB	AA	AA	AB		AB	AB	NC	AB	AB	AB	AB	AB	AB	AB	AB
1832	AX-89834734	AA	AB	AB	AA	BB	AB	AB	AA	AB	AB	AB	BB	BB	AA	BB	BB	AA	BB	AB	AB	BB	AB	BB	BB	AB	AB	BB	BB	AB	AB	AB	BB	AB	AA	AA	AB		AB	AB	BB	AB	AB	BB	BB	BB	BB	AB	AB
1833	AX-89834668	BB	BB	BB	BB	BB	BB	BB	BB	BB	BB	BB	BB	BB	BB	BB	BB	BB	BB	BB	BB	BB	BB	BB	BB	BB	BB	BB	BB	BB	NC	BB	BB	BB	BB	BB	BB		BB	BB	BB	BB	BB	BB	BB	BB	BB	BB	BB
1834	AX-89893519	AB	AA	AA	AA	AA	BB	AA	AA	AA	AA	AA	AA	AA	AB	AA	AA	AB	AA	AA	AA	AB	AA	AA	AA	AA	AA	AA	AA	AA	NC	AA	AA	AA	AB	AA	AA		AA	AA	AA	AA	AA	AA	AA	AA	AA	AA	AA
1835	AX-89791881	BB	AA	AB	BB	BB	BB	BB	BB	AB	BB	BB	BB	AA	BB	AB	BB	AB	BB	BB	BB	AB	AB	AB	AB	AB	AB	BB	AB	AB	AB	BB	BB	AB	BB	BB	BB		BB	AB	BB	BB	AB	BB	AB	BB	BB	AB	AB
1836	AX-89792389	AB	BB	AB	AB	AA	AA	AA	BB	AB	AA	AA	AA	AB	AB	AB	AA	AA	AA	AA	AA	AA	AB	AA	AB	AB	AB	AA	AB	AA	AB	AB	AA	AB	AA	AB	AA		AA	AB	AA	AA	AB	AA	AB	AA	AA	AB	AB
1837	AX-89890773	BB	AA	AB	BB	BB	BB	BB	AB	AB	BB	BB	BB	AB	BB	AB	BB	AB	BB	BB	BB	BB	AB	BB	AB	AB	AB	BB	AB	BB	AB	AB	BB	AB	BB	BB	BB		BB	AB	BB	BB	AB	BB	AB	BB	BB	AB	AB
1838	AX-89848967	AB	BB	AB	AB	AA	AB	AA	AB	AB	AA	AA	AA	AB	AB	AB	AA	AB	AA	AA	AA	AA	AB	AA	AB	AB	AB	AA	AB	AA	AB	AB	AA	AB	AA	AA	AA		AA	AB	AA	AA	AB	AA	AB	AA	AA	AB	AB
1839	AX-89833929	NC	AB	AA	BB	AA	AB	AA	AB	AB	AA	AA	AA	AB	AB	AB	AA	AB	AA	AA	AA	AA	AB	AA	AA	AA	AA	AA	AA	AA	AB	AB	AA	AA	AB	AA	AA		AA	AA	AA	AA	AA	AA	AA	AA	AA	AA	AA
1840	AX-89861796	BB	BB	BB	AB	AB	BB	AB	AA	BB	AB	BB	BB	BB	AB	BB	BB	AB	BB	BB	BB	BB	BB	BB	BB	BB	BB	BB	BB	AB	NC	BB	BB	BB	BB	BB	BB		BB	BB	BB	BB	BB	BB	BB	BB	BB	BB	BB
1841	AX-89793543	AA	AA	AA	AA	AA	AA	AA	AB	AA	AA	AB	AB	AB	NC	AB	AA	BB	AB	AB	AA	AB	AA	AB	AA	AA	AA	AA	AA	BB	AA	AB	AA	AB	AA	AA	AB		AA	AA	AA	AA	AA	AB	AA	AA	AB	AA	AA
1842	AX-89793919	AA	AB	AA	AA	AB	AA	AB	AA	AB	AA	AA	AA	AB	NC	AB	AA	AB	AB	AA	AA	AA	AB	AA	AA	AA	AB	AA	AA	AA	AB	AB	AB	AA	AA	AA	AA		AA	AA	AA	AA	AA	AA	AA	AA	AA	AA	AA
1843	AX-89835512	BB	AB	BB	BB	AB	BB	AB	BB	BB	BB	BB	BB	AB	NC	AB	BB	BB	AB	BB	BB	BB	AB	BB	BB	BB	AB	BB	BB	BB	AB	AB	AB	BB	BB	BB	BB		BB	BB	BB	BB	BB	BB	BB	BB	BB	BB	BB
1844	AX-89835760	BB	BB	AB	AB	AB	AB	BB	AB	AB	AB	AA	AA	AB	BB	AA	AB	AB	AA	AA	AB	AB	BB	AA	AB	AB	AB	AB	AB	AB	AB	AA	AA	AB	BB	AB	AB		AB	AB	AA	AA	AB	AA	AB	AA	AA	AB	AB
1845	AX-89835722	AB	BB	BB	AB	AB	AA	AB	AA	BB	AA	BB	BB	BB	BB	BB	BB	AB	BB	BB	BB	AB	BB	BB	BB	BB	BB	BB	BB	AB	NC	BB	BB	BB	AB	AB	BB		BB	BB	BB	BB	BB	BB	BB	BB	BB	BB	BB
1846	AX-89835915	AA	BB	BB	AA	AB	AA	AB	AA	BB	AA	BB	BB	BB	AA	BB	BB	AB	BB	BB	BB	AB	BB	BB	BB	BB	BB	AB	BB	AB	AB	BB	BB	BB	AA	AA	BB		BB	BB	BB	BB	BB	BB	BB	BB	BB	BB	BB
1847	AX-89893354	BB	BB	AB	BB	AA	BB	AB	AB	AB	BB	AA	AA	AB	BB	AA	AB	AB	AB	AA	AB	AA	BB	AA	AB	AB	AB	AB	AA	AB	AA	AA	AA	AB	BB	BB	AB		AB	AB	AA	AA	AB	AA	AB	AA	AA	AB	AB
1848	AX-89893907	AA	AA	AB	AB	BB	AA	AB	AB	AB	AB	AB	NC	AB	NC	AB	AB	AA	AB	AB	AB	AB	AA	BB	AB	AB	AB	AB	BB	AA	AB	AB	BB	AA	BB	AA	AA		AB	AB	BB	BB	AB	BB	AA	AB	BB	AA	AB
1849	AX-89794529	AB	NC	AB	BB	AA	BB	AB	AB	AB	AA	AA	AA	AB	AA	AA	AB	AB	AB	AA	AB	AA	BB	AA	AB	AB	AB	AB	AA	AB	AA	AA	AA	AB	AB	BB	AB		AB	AB	AA	AA	AB	AA	AB	AA	AA	AB	AB
1850	AX-89836591	AB	AA	AA	AA	AB	AB	AB	AB	AA	AA	BB	AB	AB	AA	AB	AA	AB	AA	AB	AB	BB	AA	AB	AB	AB	AB	AB	AA	AB	BB	AB	BB	AB	AA	AB	AB		AB	AA	NC	AB	AB	AA	AB	AB	AA	AB	AB
1851	AX-89836588	BB	BB	BB	BB	AB	BB	BB	BB	BB	BB	AB	BB	BB	NC	AB	BB	AB	BB	AB	AB	NC	BB	NC	BB	BB	BB	BB	BB	AB	AA	AB	AB	AB	BB	BB	AB		BB	BB	NC	BB	BB	BB	NC	NC	BB	NC	BB
1852	AX-89836375	AA	AB	BB	AA	AB	AA	BB	AA	BB	AA	AB	BB	BB	NC	AB	BB	AB	BB	AB	AB	AB	BB	BB	BB	BB	BB	BB	BB	AB	AA	AB	AB	AB	AA	AA	AB		BB	BB	NC	BB	BB	BB	NC	NC	BB	NC	BB
1853	AX-89893565	AB	AA	AA	AA	AA	AA	AB	AB	AA	AB	AB	AB	AB	AA	AA	AA	AA	AA	AA	AA	AA	AA	AB	AB	AB	AB	AB	AA	AA	AA	AA	AB	AA	BB	BB	AA		AB	AA	AB	AB	AB	AA	AA	AA	AA	AA	AB
1854	AX-89794619	AA	AA	AA	AA	AA	AA	AB	AB	AA	AA	AB	AB	AB	AA	AA	AA	AA	AA	AA	AA	AA	AA	AB	AB	AB	AB	AB	AA	AA	NC	AA	AB	AA	AA	AA	AA		AB	AA	AB	AB	AB	AA	AA	AA	AA	AA	AB
1855	AX-89836478	BB	AA	AA	AB	AB	AB	AB	BB	AA	AB	BB	AB	AB	BB	AB	AA	AB	NC	AB	AB	AB	AA	AB	AB	AB	AB	AB	AA	AB	BB	AB	BB	AB	AB	BB	AB		AB	AA	NC	AB	AB	AA	AB	AB	AA	AB	AB
1856	AX-89794614	BB	AA	AA	BB	AB	BB	AA	BB	AA	BB	AB	AA	AA	NC	AB	AA	AB	AA	AB	AB	AB	AA	AA	AA	AA	AA	AA	AA	AB	AB	AB	AB	AB	BB	BB	AB		AA	AA	NC	AA	AA	AA	NC	NC	AA	NC	AA
1857	AX-89836263	AA	AA	NC	AA	AB	AA	AB	AA	AA	AA	BB	AB	AB	AA	AB	AA	AB	AA	AB	AB	AB	AA	AB	AB	AB	AB	AB	AA	AB	AB	AB	BB	AB	AA	AA	AB		AB	AA	BB	AB	AB	AA	AB	AB	AA	AB	AB
1858	AX-89836245	AA	AA	AA	AA	AB	AA	AB	AA	AA	AA	BB	AB	AB	AA	AB	AA	AB	AA	AB	AB	AB	AA	AB	AB	AB	AB	AB	AA	AB	AB	AB	BB	AB	AA	AA	AB		AB	AA	NC	AB	AB	AA	NC	AB	AA	AB	AB
1859	AX-89794631	AA	BB	AB	AA	AA	AA	AB	AA	AB	AA	AA	AA	AB	AA	AA	AB	AB	AB	AA	AB	AB	BB	AA	AB	AB	AA	AB	AA	AB	AA	AA	AA	AB	AA	AA	AB		AB	AB	AA	AA	AB	AB	AB	AA	AA	AB	AB
1860	AX-89791729	AB	AA	AA	BB	AB	AB	AB	AB	AA	AB	BB	AB	AB	AB	AB	AA	AB	AA	AB	AB	AB	AA	AB	AB	AB	AB	AB	AA	AB	AB	AB	BB	AB	AB	AB	AB		AB	AA	NC	AB	AB	AA	AB	AB	AA	AB	AB
1861	AX-89791554	BB	AB	BB	AB	AB	AB	AA	AB	AB	AB	AA	AA	AB	AB	BB	BB	AA	AB	AB	AA	AB	AB	AA	AA	AA	AB	AA	AB	AA	AA	AA	AA	AB	AB	BB	AA		AB	AB	NC	AB	AB	AB	AB	AB	AB	AB	AB
1862	AX-89795155	BB	AB	BB	BB	AB	BB	AA	BB	AB	BB	AA	AA	AB	BB	BB	BB	AA	AB	AB	AA	AB	AB	AA	AA	AA	AB	AA	AB	AA	AA	AB	AA	AB	BB	BB	AA		AB	AB	NC	AB	AB	AB	AB	AB	AB	AB	AB
1863	AX-89791705	AB	BB	BB	AB	AB	AB	AA	AA	BB	AA	AA	AB	AB	AA	AB	BB	AA	BB	AB	AB	AB	BB	AB	AB	AB	AB	AB	BB	AB	AB	AA	AA	AB	AA	AB	AB		AB	BB	NC	AB	AB	BB	AB	AB	BB	AB	AB
1864	AX-89794578	AB	AA	AA	AA	AB	AA	NC	AB	AA	BB	AB	AA	AA	BB	AB	AA	AB	AB	BB	NC	AB	AA	AB	NC	AB	NC	AB	AB	AB	NC	AB	NC	AB	AB	AA	AB		AA	AA	NC	AA	AA	AA	NC	NC	AA	NC	AA
1865	AX-89794736	AA	BB	BB	AA	AB	AA	BB	AA	BB	AA	AB	BB	BB	NC	AB	BB	AB	BB	AB	AB	AB	BB	BB	BB	BB	BB	BB	BB	AB	AA	AB	AB	AB	AA	AA	AB		BB	BB	NC	BB	BB	BB	NC	NC	BB	NC	BB
1866	AX-89794834	AA	BB	BB	AA	AB	AA	BB	AA	BB	AA	AB	BB	BB	NC	AB	BB	AB	BB	AB	AB	AA	BB	BB	BB	BB	BB	BB	BB	AB	AA	AB	AB	AB	AA	AA	AB		BB	BB	NC	BB	BB	BB	NC	NC	BB	NC	BB
1867	AX-89836166	BB	BB	BB	BB	BB	BB	BB	BB	BB	BB	AB	BB	BB	NC	AB	BB	AB	BB	AB	BB	AB	BB	BB	BB	BB	BB	BB	BB	AB	AB	AB	BB	AB	BB	BB	AB		BB	BB	BB	BB	BB	BB	NC	NC	BB	NC	BB
1868	AX-89893223	AA	BB	BB	AB	AB	AA	AB	AB	BB	AB	BB	BB	BB	NC	BB	BB	AB	BB	BB	BB	AB	BB	BB	BB	BB	AB	BB	BB	AB	AB	BB	AB	BB	BB	AA	BB		BB	BB	BB	BB	BB	BB	BB	BB	BB	BB	BB
1869	AX-89849390	AB	AB	AB	BB	AB	BB	AA	BB	BB	BB	BB	BB	BB	NC	BB	BB	AB	AB	BB	AB	AB	AB	BB	AB	AB	AA	AB	BB	AA	AB	BB	AB	AB	BB	AB	AB		AB	AB	BB	BB	AB	BB	AB	BB	BB	AB	AB
1870	AX-89835635	AB	BB	BB	NC	AB	BB	AB	BB	BB	AB	BB	BB	BB	AA	BB	BB	AB	BB	BB	BB	AB	BB	BB	BB	BB	BB	BB	BB	AB	NC	BB	BB	BB	AB	BB	BB		BB	BB	BB	BB	BB	BB	BB	BB	BB	BB	BB
1871	AX-89836009	BB	BB	BB	AB	AB	BB	AB	AA	BB	AB	BB	BB	BB	AB	BB	BB	AB	BB	BB	BB	AB	BB	BB	BB	BB	AB	BB	BB	AB	NC	BB	AB	BB	AA	AB	BB		BB	BB	BB	BB	BB	BB	BB	BB	BB	BB	BB
1872	AX-89848826	BB	AB	BB	AB	BB	AB	AB	AB	AB	BB	AB	AA	AB	BB	BB	BB	AB	AB	BB	AB	BB	AB	AA	AA	AA	AB	AA	AB	AB	AB	BB	AB	BB	BB	AB	AB		AB	AB	AB	AB	AB	AB	NC	NC	AB	NC	AB
1873	AX-89791906	BB	AB	AA	BB	AA	BB	AB	AB	AB	BB	AB	BB	AB	BB	AA	AA	AB	AB	AA	AB	AA	AB	BB	BB	BB	AB	BB	AB	AB	AB	AA	AB	AA	BB	BB	AB		AB	AB	AB	AB	AB	AB	NC	NC	AB	NC	AB
1874	AX-89848825	AA	AB	BB	AA	BB	AA	AB	AB	AB	AA	AB	AA	AB	AA	BB	BB	AB	AB	BB	AB	BB	AB	AA	AA	AA	AB	AA	AB	AB	AB	BB	AB	BB	AA	AA	AB		AB	AB	AB	AB	AB	AB	NC	NC	AB	NC	AB
1875	AX-89836546	AA	BB	BB	AB	AB	AB	BB	BB	BB	AB	AB	BB	BB	NC	AB	BB	AB	BB	AB	AB	AB	BB	BB	BB	BB	BB	BB	BB	AB	AA	AB	AB	AB	AB	AB	AB		BB	BB	NC	BB	BB	BB	NC	NC	BB	NC	BB
1876	AX-89866329	BB	AA	AA	BB	AB	AB	AA	BB	AA	BB	AB	AA	AA	BB	AB	AA	AB	AB	AB	AB	AB	AA	NC	AA	AA	NC	AB	AA	AB	BB	AB	AB	AB	AB	AB	AB		AA	AA	NC	AA	AA	AA	NC	NC	AA	NC	AA
1877	AX-89795008	AB	AA	AA	AB	AA	AB	AA	AB	AA	AB	AA	AA	AA	AB	AA	AA	AA	AA	AA	AA	AA	AA	AA	AA	AA	AA	AA	AA	AA	NC	AA	AA	AA	AA	AA	AA		AA	AA	AA	AA	AA	AA	AA	AA	AA	AA	AA
1878	AX-89836959	AB	BB	BB	AB	BB	AB	BB	AB	BB	BB	BB	AB	BB	AA	BB	BB	BB	BB	BB	BB	BB	BB	AB	BB	BB	BB	BB	AB	BB	NC	BB	BB	BB	NC	AA	BB		BB	AB	BB	BB	BB	AB	BB	BB	AB	BB	BB
1879	AX-89832166	AB	AB	AB	AA	AA	AB	BB	AB	AB	AB	AB	AB	AB	AA	AA	AA	AB	AB	AA	AB	AA	AB	AB	AB	AB	AB	AB	AA	AB	AA	AA	AB	AB	AB	AB	AB		BB	AB	AB	AB	BB	AB	AB	AA	AA	AB	BB
1880	AX-89836919	AB	AB	AA	BB	AA	AB	BB	AB	AB	BB	AB	BB	NC	BB	AA	AA	AB	AB	AA	AB	AA	AB	BB	BB	BB	AB	BB	AB	AB	AA	AA	AB	AB	BB	AB	AB		AB	AB	AB	AB	AB	AB	NC	NC	AB	NC	AB
1881	AX-89836965	BB	NC	AA	AB	AA	BB	AA	BB	AA	AB	AA	AB	AA	BB	AA	AA	AA	AA	AA	AA	AA	AA	AB	AA	AA	AA	AA	AB	AA	NC	AA	AA	AA	AB	BB	AA		AA	AB	AA	AA	AA	AB	AA	AA	AB	AA	AA
1882	AX-89836801	BB	BB	BB	BB	BB	BB	BB	AB	BB	BB	BB	BB	BB	BB	BB	BB	BB	BB	BB	BB	BB	BB	BB	BB	BB	BB	BB	BB	BB	NC	BB	BB	BB	BB	BB	BB		BB	BB	BB	BB	BB	BB	BB	BB	BB	BB	BB
1883	AX-89836704	BB	AB	AA	BB	AA	BB	AB	BB	AB	BB	AB	BB	AB	NC	AA	AA	AB	AB	AA	AB	AA	AB	BB	BB	BB	AB	BB	AB	AB	AA	AA	AB	AA	BB	BB	AB		AB	AB	AB	AB	AB	AB	NC	NC	AB	NC	AB
1884	AX-89791931	AB	BB	BB	AB	BB	AB	BB	AB	BB	BB	BB	BB	BB	BB	BB	BB	BB	BB	BB	BB	BB	BB	BB	BB	BB	BB	BB	BB	BB	NC	BB	BB	BB	BB	BB	BB		BB	BB	BB	BB	BB	BB	BB	BB	BB	BB	BB
1885	AX-89905432	AB	AB	AA	BB	AA	AB	AB	AB	AB	AB	AB	BB	BB	BB	AA	AA	AB	AB	AA	AB	AA	AB	BB	BB	BB	AB	BB	AB	AB	AB	AA	AB	AA	BB	BB	AB		AB	AB	AB	AB	AB	AB	NC	NC	AB	NC	AB
1886	AX-89791803	AA	AB	AA	AB	AA	AA	AB	AB	AB	AB	AB	BB	AB	AB	AA	AA	AB	AB	AA	AB	AA	AB	BB	BB	BB	AB	BB	AB	AB	AB	AA	AB	AA	AA	AA	AB		AB	AB	AB	AB	AB	AB	NC	NC	AB	NC	AB
1887	AX-89835341	BB	AB	AA	BB	AB	AB	AB	AA	AB	AB	AB	BB	AB	BB	BB	AA	AB	BB	AA	AB	AA	AB	BB	BB	BB	AB	BB	AB	AB	AB	AB	AB	AB	BB	BB	AB		AB	AB	AB	AB	NC	AB	NC	NC	AB	NC	AB
1888	AX-89832459	AB	AB	BB	AB	BB	AA	AB	AB	AB	AB	AB	AA	AB	AB	BB	BB	AB	AB	BB	AB	BB	AB	AA	AA	AA	AB	AA	AB	AB	AB	BB	AB	BB	BB	AB	AB		AB	AB	AB	AB	AB	AB	NC	NC	AB	NC	AB
1889	AX-89892546	AB	AB	AA	AB	AA	BB	AB	AB	AB	AB	AB	BB	AB	NC	AA	AA	AB	AB	AA	AB	AA	AB	BB	BB	BB	AB	BB	AB	AB	AB	AA	AB	AA	AB	AB	AB		AB	AB	AB	AB	AB	AB	NC	NC	AB	NC	AB
1890	AX-89866248	BB	AB	BB	AA	AB	AA	AB	AA	AB	AA	AB	AA	AB	NC	AA	BB	AB	AA	BB	AB	BB	AB	AA	AA	AA	AB	AA	AB	AB	AB	AB	AB	AB	AA	AA	AB		AB	AB	AB	AB	AB	AB	NC	NC	AB	NC	AB
1891	AX-89848925	AB	AB	BB	BB	AB	AB	AB	AB	AB	AB	AB	AA	AB	AB	AA	BB	AB	AA	BB	AB	BB	AB	AA	AA	AA	AB	AA	AB	AB	AB	AB	AB	AB	AA	AA	AB		AB	AB	AB	AB	AB	AB	NC	NC	AB	NC	AB
1892	AX-89792306	AB	AB	AA	AA	AB	AA	AB	AB	AB	AA	AB	BB	AB	AA	BB	AA	AB	BB	AA	AB	AA	AB	BB	BB	BB	AB	BB	AB	AB	AB	AB	AB	AB	AA	AA	AB		AB	AB	AB	AB	AB	AB	NC	NC	AB	NC	AB
1893	AX-89848928	AB	AB	BB	AB	AB	AB	AB	AB	AB	BB	AB	AA	AB	AB	AA	BB	AB	AA	BB	AB	BB	AB	AA	AA	AA	AB	AA	AB	AB	AB	AB	AB	AB	BB	BB	AB		AB	AB	AB	AB	AB	AB	NC	NC	AB	NC	AB
1894	AX-89872626	BB	AB	AA	AA	BB	BB	AB	AB	AB	AA	AA	BB	BB	AA	BB	AA	BB	BB	AA	AB	AA	AB	AB	AB	AB	AB	BB	AB	BB	AB	AB	AB	AB	AB	AA	AB		AB	NC	AB	AB	AB	AB	NC	NC	AB	NC	AB
1895	AX-89792074	BB	AB	BB	BB	AB	BB	AB	BB	AB	BB	BB	AA	AA	BB	AA	BB	AA	AA	BB	AB	BB	AB	AB	AB	AB	AB	AA	AB	AA	AB	AB	AB	AB	BB	BB	AB		AB	NC	AB	AB	AB	AB	NC	NC	AB	NC	AB
1896	AX-89891081	AB	AB	AA	AA	BB	AB	AB	AA	AB	AB	AA	BB	BB	AB	BB	AA	BB	BB	AA	AB	AA	AB	AB	AB	AB	AB	BB	AB	BB	AB	AB	AB	AB	AA	AB	AB		AB	NC	AB	AB	AB	AB	NC	NC	AB	NC	AB
1897	AX-89833815	NC	AB	AA	BB	BB	AB	AB	AB	AB	AA	AA	BB	BB	AB	BB	AA	AB	BB	AA	AB	AA	AB	AB	AB	AB	AB	BB	AB	BB	AB	AB	AB	AB	AB	AA	AB		AB	NC	AB	AB	AB	AB	NC	NC	AB	NC	AB
1898	AX-89792720	BB	AB	AA	BB	BB	BB	AA	BB	AB	BB	AA	BB	BB	BB	BB	AA	AB	BB	AA	AB	AA	AB	AB	AB	AB	AB	BB	AB	BB	AB	AB	AB	AB	BB	BB	AB		AB	NC	AB	AB	AB	AB	NC	NC	AB	NC	AB
1899	AX-89833788	AA	AB	AA	AB	BB	AB	NC	AB	AB	AB	AA	BB	BB	AB	BB	AA	AB	BB	AA	AB	AA	AB	AB	AB	AB	AB	AB	AB	BB	AB	AB	AB	AB	AB	AA	AB		AB	NC	AB	AB	AB	AB	NC	NC	AB	NC	AB
1900	AX-89792971	AB	AA	AA	AA	AA	AA	AA	AA	AA	AA	AA	AA	AA	AA	AA	AA	AA	AA	AA	AA	AA	AA	AA	AA	AA	AA	AA	AA	AA	NC	AA	AA	AA	AB	AA	AA		AA	AA	AA	AA	AA	AA	AA	AA	AA	AA	AA
1901	AX-89792645	AB	AB	AA	AB	AA	AB	AB	BB	AB	AB	AA	AA	NC	BB	AA	AA	AB	AB	AA	AB	AA	AB	AA	AA	AB	NC	AA	AA	AB	AB	AA	AB	AA	AB	AB	AB		AA	AA	AA	AA	AA	AA	AA	AA	AA	AA	AA
1902	AX-89849007	AA	AB	BB	AA	AB	AA	AB	AB	AB	AA	BB	AA	AB	AA	AA	BB	AB	AB	BB	AB	BB	AB	AB	AB	AB	AB	AB	AB	AA	AB	AB	AB	AB	AA	AA	AB		AB	NC	AB	AB	AB	AB	NC	NC	AB	NC	AB
1903	AX-89834541	AB	AB	AB	BB	AB	AB	BB	BB	BB	AB	BB	AB	AB	BB	BB	AA	AB	BB	BB	BB	AB	AB	BB	BB	BB	BB	BB	BB	BB	BB	BB	BB	AB	BB	BB	BB		AB	BB	BB	AB	AB	AB	BB	BB	AB	BB	AB
1904	AX-89834038	BB	BB	AB	AA	AB	AB	BB	AB	AB	BB	AB	BB	AB	AB	BB	BB	BB	BB	AB	AB	AB	BB	AB	NC	AB	AB	BB	BB	BB	AB	BB	AB	AB	AB	BB	BB		AB	NC	AB	BB	AB	AB	AB	AB	AB	AB	BB
1905	AX-89891629	BB	AA	AB	AB	AA	AB	AA	BB	AA	AB	AB	AA	AA	BB	AA	AA	AA	AA	AB	AB	AA	AA	AB	BB	AB	AB	AA	AA	AA	NC	AA	AB	AA	BB	AB	AA		AB	NC	AB	AA	AB	AB	AB	NC	AB	AB	AA
1906	AX-89891243	AB	BB	AB	AB	AB	AB	BB	AB	AB	AB	AB	BB	AB	BB	BB	BB	BB	BB	AB	AB	AB	BB	AB	AB	AB	AB	BB	BB	BB	AB	BB	AB	AB	AB	BB	BB		AB	NC	AB	BB	AB	AB	AB	AB	AB	AB	BB
1907	AX-89793218	AA	AA	AB	AB	AA	AA	AA	AB	AB	AA	AB	AA	AA	AB	AA	AA	AA	AA	AB	AB	AA	AA	AB	AB	AB	AB	AA	AA	AA	AB	AA	AB	AA	AA	AA	AA		AB	NC	AB	AA	AB	AB	AB	NC	AB	AB	AA
1908	AX-89834506	AB	BB	AB	BB	BB	AB	BB	BB	AB	AB	AB	BB	NC	BB	BB	BB	BB	BB	AB	AB	BB	BB	AB	AB	AB	AB	BB	BB	BB	AB	BB	AB	BB	BB	BB	BB		AB	NC	AB	BB	AB	AB	AB	NC	AB	AB	BB
1909	AX-89890292	BB	BB	AB	BB	AB	AB	BB	BB	AB	BB	AB	BB	AB	NC	BB	BB	BB	BB	AB	AB	AB	BB	AB	AB	AB	AB	BB	BB	BB	AB	BB	AB	AB	BB	BB	BB		AB	NC	AB	BB	AB	AB	AB	NC	AB	AB	BB
1910	AX-89792214	AB	AA	AB	AA	AB	AA	AB	AB	AB	AB	AB	AA	BB	AB	AA	AA	AA	AA	AB	AB	BB	AA	BB	AB	AB	BB	AA	AB	AB	AB	AA	BB	AB	AA	AA	AA		AB	NC	AB	AA	AB	AB	AB	NC	AB	AB	AA
1911	AX-89834532	AB	AB	AB	BB	AB	AB	BB	BB	BB	AB	BB	AB	AB	BB	BB	AA	AB	BB	BB	BB	AB	AB	BB	BB	BB	BB	BB	BB	BB	BB	BB	BB	AB	BB	BB	BB		AB	BB	BB	AB	AB	AB	BB	BB	AB	BB	AB
1912	AX-89793288	BB	AA	AB	BB	AA	BB	AA	BB	AB	BB	AB	AA	AA	BB	AA	AA	AA	AA	AB	AB	AA	AA	AB	AB	AB	AB	AA	AA	AA	AB	AA	AB	AA	BB	BB	AA		AB	NC	AB	AA	AB	AB	AB	NC	AB	AB	AA
1913	AX-89834495	AB	AB	AB	BB	AB	BB	AA	BB	AA	BB	AA	AB	AB	BB	AA	AB	AB	AA	AA	AA	AB	AB	AA	AA	AA	AA	AA	AA	AA	AA	AA	AA	AB	BB	AB	AA		AB	AA	AA	NC	AB	NC	AA	AA	AB	AA	AB
1914	AX-89834625	AA	AB	AB	AB	AB	AB	AA	AA	AA	AA	AA	AB	AB	NC	AA	BB	AB	AA	AA	AA	AB	AB	AA	AA	AA	AA	AA	AA	AA	AA	AA	AA	AB	AA	AA	AA		AB	AA	AA	AB	AB	AB	AA	AA	AB	AA	AB
1915	AX-89834767	BB	AB	AB	BB	BB	AB	BB	BB	BB	AB	AB	BB	BB	AB	BB	BB	BB	BB	AB	AB	BB	BB	AB	AA	AA	AB	BB	BB	BB	AB	BB	AB	BB	BB	BB	BB		AB	NC	AB	BB	NC	AB	AB	NC	AB	AB	BB
1916	AX-89892056	BB	AB	AB	BB	AB	AB	BB	AB	BB	BB	BB	AB	AB	AA	BB	AA	AB	BB	BB	BB	AB	AB	BB	BB	BB	BB	BB	BB	BB	NC	AB	BB	AB	AB	BB	BB		AB	BB	BB	NC	AB	AB	BB	BB	AB	BB	AB
1917	AX-89905736	AB	AB	AB	BB	AA	BB	AB	BB	AA	BB	BB	AB	AA	NC	BB	AA	AA	AA	AB	BB	AA	AA	AB	BB	BB	AB	AB	AB	AA	AB	AB	AB	AB	BB	BB	AB		AB	BB	BB	AA	AB	AB	BB	BB	AB	BB	AB
1918	AX-89835308	AA	AB	AB	AA	BB	AB	BB	AA	BB	AA	AB	BB	BB	NC	BB	BB	BB	BB	AB	AB	BB	BB	AB	AA	AA	NC	BB	BB	BB	AB	BB	AB	BB	AA	AB	BB		AB	NC	AB	BB	AB	AB	AB	NC	AB	AB	BB
1919	AX-89811948	AB	AB	AB	BB	BB	BB	AB	BB	BB	BB	AA	AB	AB	NC	AA	BB	BB	BB	AB	AA	BB	BB	AA	AA	AA	AB	AA	AB	BB	AB	AB	AB	AB	BB	BB	AB		AB	AA	AA	BB	AB	AB	AA	AA	AB	AA	AB
1920	AX-89872652	BB	AB	AB	BB	BB	BB	BB	BB	BB	BB	AB	BB	BB	NC	BB	BB	BB	BB	AB	AB	BB	BB	AB	AA	AB	AB	BB	BB	BB	AB	BB	AB	BB	AB	AB	BB		AB	NC	AB	BB	AB	AB	AB	NC	AB	NC	BB
1921	AX-89793663	AA	AB	AA	AA	AA	AB	AB	BB	AA	AA	AA	AB	AB	AB	AB	AA	AA	AA	AB	BB	AA	AA	AB	NC	BB	AB	AB	AB	AA	AB	AB	AB	AA	BB	BB	AB		AB	AB	AB	AA	AB	NC	NC	AB	AB	AB	AB
1922	AX-89849280	BB	AB	AB	AB	AA	AA	AA	AA	AA	AB	AA	AA	AA	NC	AA	AA	AA	AA	AB	AB	AA	AA	AA	AB	AB	AB	AA	AA	AA	AB	AA	AB	AA	AB	AA	AA		AB	AB	AA	AA	AB	AB	AB	AB	AB	AB	AA
1923	AX-89836058	BB	AB	AB	BB	AA	BB	AA	BB	AA	BB	AB	AA	AA	NC	AA	AA	AA	AA	AB	AB	AA	AA	AB	BB	AB	AB	AA	AA	AA	AB	AA	AB	AA	BB	BB	AA		AB	NC	AB	AA	AB	AB	AB	NC	AB	NC	AA
1924	AX-89793683	AB	BB	AA	BB	AA	BB	AA	BB	AA	AB	AA	AA	AA	AB	AA	NC	AA	AA	AA	AA	AB	AB	AA	AA	AA	AA	AA	AA	AA	NC	AA	AA	AA	AB	AB	AA		AA	AA	AA	AA	AA	AA	AA	AA	AA	AA	AA
1925	AX-89835039	AA	AB	AB	BB	AA	AB	AA	BB	AA	BB	AA	AA	AA	AB	AA	AA	AA	AA	AB	AB	AA	AA	AA	AB	AB	AB	AA	AA	AA	NC	AA	AB	AA	BB	AB	AA		AB	AB	AA	AA	AB	AB	AB	AB	AB	AB	AA
1926	AX-89842323	AA	AB	AB	AA	AA	BB	AB	AB	AA	AB	AB	NC	AA	AB	AB	AA	AA	AB	BB	NC	AA	AB	AB	BB	BB	AB	AB	AA	AB	AB	AB	AB	AB	AA	AB	AB		BB	BB	AB	AB	AB	BB	AB	AB	AB	AB	AB
1927	AX-89799182	AA	AA	AB	AA	AA	AA	NC	AA	AB	AA	AB	AA	AB	AB	AA	AA	AA	AB	AA	AA	AB	AB	AB	AA	AA	AA	AB	AA	AA	AB	AA	AA	AA	AA	AA	AB		AA	AA	AB	AB	AB	AA	AB	AB	AB	AB	AB
1928	AX-89849905	BB	AA	AB	BB	AA	BB	AA	BB	AB	BB	AB	AA	BB	NC	AA	AA	AA	AB	AA	AA	AB	AB	AB	AA	AA	AA	AB	AA	AA	AB	AA	AA	AA	BB	BB	AB		AA	AA	AB	AB	AB	AA	AB	AB	AB	AB	AB
1929	AX-89899386	BB	AB	AB	AB	AA	BB	AB	AB	AA	AA	AB	BB	AA	NC	AB	AA	AA	AB	BB	BB	AA	AB	AB	BB	BB	AB	AA	AA	AB	AB	BB	AB	AB	BB	AB	AB		BB	BB	AB	AB	AB	BB	AB	AB	AB	AB	AB
1930	AX-89906560	BB	AA	AA	BB	AA	BB	AA	BB	AA	BB	AA	BB	AA	BB	NC	AA	AA	AB	BB	BB	AA	AA	AB	BB	BB	AB	AB	AB	AA	NC	BB	AB	AA	BB	BB	AB		NC	NC	NC	NC	NC	NC	NC	NC	NC	NC	NC
1931	AX-89842590	AA	AB	AB	AA	BB	AA	AB	AB	BB	AA	AB	AA	BB	AA	AB	BB	BB	AB	AA	AA	BB	AB	AB	AA	AA	AB	BB	BB	AB	AB	AA	AB	AB	AA	AA	AB		AA	AA	AB	AB	AB	AA	AB	AB	AB	AB	AB
1932	AX-89900059	AA	AB	AB	AA	BB	AA	AB	AA	BB	AA	AB	AA	BB	NC	AB	BB	BB	AB	AA	AB	BB	AB	AB	AA	AA	AB	AB	AB	AB	AB	AA	AB	AB	AA	AA	AB		AA	AA	AB	AB	AB	AA	AB	AB	AB	AB	AB
1933	AX-89842603	BB	AB	BB	BB	BB	BB	AB	AB	BB	BB	BB	AB	BB	AB	BB	BB	NC	BB	AB	AB	BB	AB	BB	AB	AB	BB	BB	BB	BB	BB	AA	BB	BB	BB	BB	BB		NC	NC	AB	AB	AB	NC	AB	AB	AB	AB	AB
1934	AX-89837008	BB	AB	AB	BB	BB	BB	AB	BB	BB	BB	AB	AA	BB	NC	AB	BB	BB	AB	AA	AA	BB	AB	AB	AA	AA	AB	BB	BB	AB	AB	AA	AB	AB	BB	BB	AB		AA	AA	AB	AB	AB	AA	AB	AB	AB	AB	AB
1935	AX-89837470	AA	AB	AB	AB	BB	AA	BB	AB	BB	BB	AB	AA	BB	AB	AB	BB	BB	BB	AB	AB	BB	AB	AB	AA	AA	AB	BB	BB	BB	BB	AB	AB	AB	BB	AA	BB		AA	AA	AB	AB	AB	AA	AB	NC	AB	NC	AB
1936	AX-89837451	BB	AB	AB	BB	AA	BB	AA	BB	AA	BB	AB	BB	AA	BB	AB	AA	AA	AA	AB	AB	AA	AB	AB	BB	BB	AB	AA	AA	AA	AA	AB	AB	AB	BB	AB	AA		BB	BB	AB	AB	AB	BB	AB	NC	AB	NC	AB
1937	AX-89850072	BB	BB	BB	AB	BB	AA	BB	AB	BB	BB	BB	BB	BB	AB	BB	BB	BB	BB	BB	BB	BB	BB	BB	BB	BB	BB	BB	BB	BB	NC	BB	BB	BB	BB	BB	BB		BB	BB	BB	BB	BB	BB	BB	BB	BB	BB	BB
1938	AX-89849900	BB	AA	AB	BB	AA	BB	AA	AB	AA	BB	AB	AA	AA	NC	AA	AA	AA	AB	AA	AA	AB	AB	AA	AA	AA	AA	AB	AA	AA	AB	AA	AA	AA	BB	BB	AB		AA	AA	AA	AB	AB	AA	AB	NC	AB	NC	AB
1939	AX-89849866	AA	BB	AB	AA	BB	AA	BB	AB	BB	AA	AB	BB	BB	AA	BB	BB	BB	AB	BB	BB	AB	AB	BB	BB	BB	BB	AB	AB	BB	AB	BB	BB	BB	AB	AB	AB		BB	BB	BB	AB	AB	BB	AB	NC	AB	NC	AB
1940	AX-89849839	AA	AA	AB	AA	AA	AA	AB	AB	AA	AB	AB	AB	AA	AA	AB	AA	AA	AB	AB	AB	AB	AB	AA	AA	AA	AB	AB	AB	AB	AB	AB	AA	AB	AB	AB	BB		AA	AA	AB	BB	AB	AA	AB	BB	BB	BB	AB
1941	AX-89796319	AB	AB	BB	AB	AA	AB	AB	BB	AA	AA	BB	BB	AB	AB	AB	AA	AA	AB	BB	BB	AB	BB	AB	BB	BB	AB	BB	AB	AB	AB	AB	AB	AB	AB	BB	BB		BB	BB	BB	BB	BB	BB	BB	BB	BB	BB	BB
1942	AX-89808429	AB	AB	BB	BB	AB	BB	BB	BB	AA	BB	AB	AB	AA	AB	AB	AB	AB	AB	BB	NC	AB	AB	AA	AA	AA	AB	AB	AB	AB	NC	AB	AA	AB	BB	BB	BB		NC	NC	NC	BB	BB	NC	NC	BB	BB	BB	BB
1943	AX-89841891	BB	BB	BB	AA	BB	BB	BB	AB	BB	AA	BB	BB	BB	AB	BB	BB	BB	BB	BB	BB	BB	BB	BB	BB	BB	BB	BB	BB	BB	NC	BB	BB	BB	AB	AB	BB		BB	BB	BB	BB	BB	BB	BB	BB	BB	BB	BB
1944	AX-89798354	AA	BB	BB	AB	AB	AA	AB	AB	AB	AB	BB	BB	AB	AB	AB	AB	AB	AB	BB	BB	AB	BB	AB	BB	BB	AB	BB	AB	AB	NC	AB	AB	AB	BB	AA	BB		BB	BB	BB	BB	BB	BB	BB	BB	BB	BB	BB
1945	AX-89841886	AB	AA	AA	BB	AB	AB	AB	BB	AB	BB	AA	AA	AB	BB	AB	AB	AB	AA	AA	AA	AB	AA	AB	AA	AA	AB	AA	AB	AB	AA	AB	AB	AB	AB	BB	AA		AA	AA	AA	AA	AA	AA	AA	AA	AA	AA	AA
1946	AX-89864570	AB	AA	AB	AB	AA	AB	AA	AB	AA	AB	AB	AA	AA	AB	AA	AA	AA	AB	AA	AA	AB	AB	AA	AA	AA	AA	AB	AB	AA	AB	AA	AA	AA	AB	AA	AB		AA	AA	AA	AB	AB	AA	AB	NC	AB	NC	AB
1947	AX-89906477	BB	AA	AA	BB	AB	AB	AB	AB	AB	NC	AA	AA	AB	BB	AB	AB	AB	AA	AA	AA	AB	AA	AB	AA	AA	AB	AA	AB	AB	AA	AB	AB	AB	BB	BB	AA		AA	AA	AA	AA	AA	AA	AA	AA	AA	AA	AA
1948	AX-89899932	AA	AB	AB	AA	AB	AB	NC	BB	BB	AB	BB	AB	AA	AA	AB	BB	AB	AB	BB	BB	AB	AB	AB	AB	AB	AB	BB	AB	AB	BB	AB	AB	AA	AA	AA	BB		AB	AB	BB	AB	BB	AB	BB	BB	AB	BB	BB
1949	AX-89842694	AB	BB	AB	AB	BB	AB	BB	AB	AB	BB	AB	BB	BB	AB	BB	AB	AB	AB	BB	BB	AB	AB	BB	BB	BB	BB	AB	AB	BB	AB	BB	BB	BB	AA	BB	AB		BB	BB	BB	AB	AB	BB	AB	NC	AB	NC	AB
1950	AX-89799868	AA	BB	AB	AB	BB	AA	BB	AB	AB	AA	AB	BB	NC	AA	BB	AB	AB	AB	BB	BB	AB	AB	BB	BB	BB	BB	AB	AB	BB	AB	BB	BB	BB	AB	AA	AB		BB	BB	BB	AB	AB	BB	AB	NC	AB	NC	AB
1951	AX-89850331	AB	AB	AB	AB	AB	AB	AB	BB	AA	AB	AA	AB	AB	AB	AB	AA	AB	AB	AA	AA	AB	AB	AB	AB	AB	AB	AB	AB	AB	NC	AB	AB	AB	AB	AB	AA		AB	AB	AA	AB	AA	AB	AA	AA	AB	AA	AA
1952	AX-89799178	AB	AA	AA	BB	AA	BB	AA	BB	AA	AB	AA	AA	AA	BB	AA	AA	AA	AA	AA	AA	AA	AA	AA	AA	AA	AA	AA	AA	AA	NC	AA	AA	AA	BB	AB	AA		AA	AA	AA	AA	AA	AA	AA	AA	AA	AA	AA
1953	AX-89850330	AA	AB	AB	AB	AB	AB	AB	AA	BB	AA	AB	AA	AA	AB	AB	BB	AB	AB	AB	AB	AB	AB	AA	AA	AA	AB	AB	AB	AB	BB	AB	AA	AA	AA	AB	BB		AA	AA	AB	AB	AB	AA	AB	NC	AB	NC	AB
1954	AX-89850329	AA	AA	AB	BB	AA	AB	AA	BB	AB	AA	AB	AA	AA	AB	AA	AB	AB	AB	AA	AA	AB	AB	AA	AA	AA	AA	AB	AB	AA	AB	AA	AA	AA	AB	BB	AB		AA	AA	AA	AB	AB	AA	AB	NC	AB	NC	AB
1955	AX-89850326	BB	BB	AB	AB	BB	AB	BB	AB	AB	BB	AB	BB	BB	AB	BB	AB	AB	AB	BB	BB	AB	AB	BB	BB	BB	BB	AB	AB	BB	AB	BB	BB	BB	BB	AB	AB		BB	BB	BB	AB	AB	BB	AB	NC	AB	NC	AB
1956	AX-89808602	AB	AB	AB	AB	AB	AA	AA	AA	BB	AB	AB	AA	AB	AA	AA	BB	AB	AB	AA	AA	AB	AB	AB	AA	AA	AB	AB	AB	AA	BB	AA	AA	AA	AB	AA	AB		AA	AA	AB	AB	AB	AA	AB	NC	AB	NC	AB
1957	AX-89906537	AB	AB	AB	BB	AB	AB	BB	AB	AA	AB	AA	AB	AB	AB	BB	AA	AB	AB	NC	NC	AB	AB	AA	BB	AB	AB	AA	AB	BB	AA	BB	BB	BB	BB	BB	AB		AB	AB	AA	AB	AA	AB	AA	AA	AB	AA	AA
1958	AX-89842537	BB	BB	BB	AB	BB	AB	BB	BB	BB	AB	BB	BB	BB	BB	BB	BB	BB	BB	BB	BB	BB	BB	BB	BB	BB	BB	BB	BB	BB	NC	BB	BB	BB	AB	AA	BB		BB	BB	BB	BB	BB	BB	BB	BB	BB	BB	BB
1959	AX-89799692	AB	AA	AA	BB	AA	AB	AA	BB	AA	BB	AA	AA	AA	BB	AA	AA	AA	AA	AA	AA	AA	AA	AA	AA	AA	AA	AA	AA	AA	NC	AA	AA	AA	AB	AB	AA		AA	AA	AA	AA	AA	AA	AA	AA	AA	AA	AA
1960	AX-89842460	AA	AB	BB	AA	AB	AA	BB	AA	AA	AA	BB	AB	AB	AA	BB	AA	BB	AB	AB	BB	BB	BB	AB	BB	BB	AB	BB	AB	BB	AA	BB	BB	BB	AB	AB	BB		AB	BB	NC	NC	AB	AB	BB	BB	BB	BB	AB
1961	AX-89842396	AA	AB	AA	AA	AB	AA	AA	AA	BB	AA	AB	AB	AB	NC	AA	BB	AA	AB	AB	AB	AA	AA	BB	AB	AB	BB	AB	AB	AA	BB	AA	AB	AA	AA	AA	AA		AB	AB	NC	AA	AB	AB	AB	AA	AA	AA	AB
1962	AX-89842364	AB	AB	BB	AB	AB	AB	BB	AB	AA	AB	AB	AB	AB	AA	BB	AA	BB	AB	AB	AB	BB	BB	AA	NC	AB	AA	AB	AB	BB	AA	BB	AB	AB	AB	AB	BB		AB	AB	NC	BB	AB	AB	AB	BB	BB	BB	AB
1963	AX-89850298	AB	AA	AA	AB	AA	AB	AA	BB	AA	AB	AA	AA	AA	AB	AA	AA	AA	AA	AA	AA	AA	AA	AA	AA	AA	AA	AA	AA	AA	NC	AA	AA	AA	AA	AA	AA		AA	AA	AA	AA	AA	AA	AA	AA	AA	AA	AA
1964	AX-89799541	AA	AA	AA	AA	AA	AA	AA	BB	AA	AA	AA	AA	AA	AA	AA	AA	AA	AA	AA	AA	AA	AA	AA	AA	AA	AA	AA	AA	AA	NC	AA	AA	AA	AA	AA	AA		AA	AA	AA	AA	AA	AA	AA	AA	AA	AA	AA
1965	AX-89899520	AA	AB	BB	AA	AB	AA	BB	AA	AB	AA	AB	NC	AB	AA	BB	AA	BB	AB	AB	AB	BB	BB	AA	AB	NC	AA	AB	AB	BB	AA	BB	BB	AB	AA	AA	BB		BB	AB	AB	BB	BB	BB	AB	BB	BB	BB	BB
1966	AX-89842225	BB	AA	AA	AB	AA	BB	AA	AB	AA	AB	AA	AA	AA	BB	AA	AA	AA	AA	AA	AA	AA	AA	AA	AA	AA	AA	AA	AA	AA	NC	AA	AA	AA	BB	BB	AA		AA	AA	AA	AA	AA	AA	AA	AA	AA	AA	AA
1967	AX-89799464	AA	BB	BB	AA	AB	AA	NC	AB	AB	AA	AB	BB	BB	AA	BB	AB	AB	AB	AB	AB	AB	BB	AB	NC	AB	AA	AB	BB	AB	AA	BB	AB	AB	AA	AA	BB		BB	NC	NC	BB	BB	BB	NC	BB	BB	BB	BB
1968	AX-89799457	AA	BB	BB	AB	AB	AA	AB	AA	AB	AA	BB	BB	BB	AB	BB	AB	AB	AB	AB	AB	AB	BB	BB	BB	BB	AB	BB	BB	AB	AA	BB	BB	AB	AA	AA	BB		BB	BB	NC	BB	BB	BB	BB	BB	BB	BB	BB
1969	AX-89799243	AB	AB	AA	AB	AB	NC	AB	AB	AB	NC	AA	AA	AA	AB	AB	AB	AA	AB	AB	AB	AA	AA	AA	NC	AA	AA	AA	AB	AA	AA	AB	AA	AA	NC	AB	AB		AA	AA	NC	AA	AA	AA	AA	AA	AA	AA	AA
1970	AX-89900009	BB	AB	AB	AB	BB	AA	BB	AA	BB	AB	AB	AB	AA	BB	AB	BB	BB	BB	BB	BB	AB	AB	AA	AA	AA	AB	AB	AB	BB	BB	BB	AA	BB	AB	AA	BB		AB	AA	BB	BB	AB	AA	AB	BB	BB	BB	AB
1971	AX-89864573	AB	AA	AB	AB	AB	AB	AB	AB	AB	NC	AB	AB	AA	AB	AA	AB	BB	AB	AB	AB	AB	AB	AA	AA	AA	AB	AB	AA	BB	BB	AB	AA	BB	AB	BB	AB		AB	AA	AB	BB	AB	AA	AB	BB	BB	BB	AB
1972	AX-89906494	BB	AB	AA	BB	BB	BB	BB	AB	AB	BB	AB	AA	AA	BB	AB	BB	AB	BB	BB	BB	AB	AA	AB	AB	AB	BB	AB	AB	AB	BB	AB	AB	AB	BB	BB	AB		AA	NC	NC	AA	AA	AA	NC	AA	AA	AA	AA
1973	AX-89850271	AA	AB	BB	AB	AA	AB	AA	AA	AB	AB	AB	BB	BB	NC	AB	AA	AB	AA	AA	AA	AB	BB	AB	AB	AB	AA	AB	AB	AB	AA	AB	AB	AB	AA	AA	AB		BB	NC	NC	BB	BB	BB	NC	BB	BB	BB	BB
1974	AX-89899431	AA	AA	AA	AA	AB	AB	AB	AA	AB	AB	AA	AA	AA	AA	AA	AB	AB	AB	AB	AB	AB	AA	AA	AA	AA	AB	AA	AA	AB	BB	AA	AA	AB	AA	AA	AA		AA	AA	NC	AA	AA	AA	AA	AA	AA	AA	AA
1975	AX-89906503	AB	AB	BB	AB	AA	AB	AA	AB	AB	AB	AB	BB	BB	NC	AB	AA	AB	AA	AA	AA	AB	BB	AB	AB	AB	AA	AB	AB	AB	AA	AB	AB	AB	AB	AA	AB		BB	NC	NC	BB	BB	BB	NC	BB	BB	BB	BB
1976	AX-89900141	AB	BB	AB	AA	BB	AA	AB	AB	AB	AA	AB	AB	BB	AB	BB	BB	AB	AB	AB	AB	BB	AB	BB	BB	BB	BB	AB	BB	AB	BB	AA	BB	AB	AA	AA	AA		AB	BB	AA	AA	AB	BB	AB	AA	AA	AA	AB
1977	AX-89906555	BB	AA	AB	AB	AA	BB	AB	BB	AB	AB	AB	AB	AA	NC	AA	AA	AB	AB	AB	AB	AA	AB	AA	AA	AA	AA	AB	AA	AB	AA	BB	AA	AB	AB	AB	BB		AB	AA	BB	BB	AB	AA	AB	BB	BB	BB	AB
1978	AX-89842955	AB	BB	AB	AA	BB	AA	AB	AB	AB	AA	AB	AB	AB	NC	BB	BB	AB	AB	AB	AB	AB	AB	BB	BB	BB	BB	AB	BB	AB	BB	AA	BB	AB	AB	AA	AA		AB	BB	AA	AA	AB	BB	AB	AA	AA	AA	AA
1979	AX-89842939	AA	BB	AB	AA	BB	AA	AB	AB	AB	AA	AB	AB	BB	NC	BB	BB	AB	AB	AB	AB	AB	AB	BB	BB	BB	BB	AB	BB	AB	BB	AA	BB	AB	AA	AA	AA		AB	BB	AA	AA	AB	BB	AB	AA	AA	AA	AB
1980	AX-89905954	AA	AB	AB	AA	BB	AB	BB	AA	BB	AA	AB	AB	BB	NC	AB	BB	BB	BB	BB	BB	BB	AB	AA	AA	AA	AB	AB	AB	BB	BB	BB	AA	BB	AA	AA	BB		AB	AA	BB	BB	AB	AA	AB	BB	BB	BB	BB
1981	AX-89850374	BB	AA	BB	AB	AB	AB	BB	BB	BB	AB	AB	AB	BB	NC	AA	AB	BB	BB	BB	BB	BB	AB	AA	AA	AA	AB	AB	AA	BB	BB	BB	AA	BB	AB	AA	BB		AB	AB	BB	AB	AB	AB	AB	BB	BB	BB	BB
1982	AX-89843030	BB	BB	AB	BB	BB	BB	AB	BB	AB	BB	AB	AB	AB	NC	BB	BB	AB	AB	AB	AB	AA	AB	BB	BB	BB	BB	AB	BB	AB	BB	AA	BB	AB	BB	BB	AA		AB	BB	AA	AB	AB	BB	AB	AA	AA	AA	AA
1983	AX-89795687	AA	AA	AB	AA	AB	AA	AB	AB	AB	AA	AA	AA	AB	AA	AA	AB	AB	AA	AB	AB	AB	AA	AA	AA	AA	AB	AA	AA	AB	BB	AB	AA	AB	AA	AA	AA		AA	AA	AA	AA	AA	AB	AA	AA	AA	AA	AA
1984	AX-89906091	AA	BB	AB	AA	AB	AA	AB	AA	AB	AA	BB	BB	AB	NC	BB	AB	AB	BB	AB	AB	BB	BB	BB	BB	BB	AB	BB	BB	AB	AA	BB	BB	AB	AA	AA	BB		BB	BB	BB	BB	BB	AB	BB	BB	BB	BB	BB
1985	AX-89795678	BB	AA	AB	AB	AB	BB	AB	BB	AB	BB	AA	AA	AB	BB	AA	AB	AB	AA	AB	AB	AB	AA	AA	AA	AA	AB	AA	AA	AB	BB	AB	AA	AB	AB	AB	AA		AA	AA	AA	AA	AA	AB	AA	AA	AA	AA	AA
1986	AX-89838461	AA	AA	AB	AA	AB	AA	AB	AA	AB	AA	AA	AA	AB	NC	AA	AB	AB	AA	AB	AB	AB	AA	AA	AA	AA	AB	AA	AA	AB	BB	AB	AA	AB	AA	AA	AA		AA	AA	AA	AA	AA	AB	AA	AA	AA	AA	AA
1987	AX-89795729	BB	AA	AB	BB	AB	BB	AB	AB	BB	BB	AA	AA	AB	BB	AA	AB	AB	AA	AB	AB	AB	AA	AA	AA	AA	AB	AA	AA	AB	BB	AB	AA	AB	BB	BB	AA		AA	AA	AA	AA	AA	AB	AA	AA	AA	AA	AA
1988	AX-89837824	AB	AA	AA	AB	AA	BB	AA	BB	AA	AB	AA	AA	AA	AB	AA	AA	AA	AA	AA	AA	AA	AA	AA	AA	AA	AA	AA	AA	AA	NC	AA	AA	AA	AB	BB	AA		AA	AA	AA	AA	AA	AA	AA	AA	AA	AA	AA
1989	AX-89914405	BB	BB	AB	BB	BB	AB	AB	BB	BB	BB	AA	AB	AB	NC	BB	BB	AB	BB	AB	AB	AB	AB	AA	AB	AB	AB	AA	BB	AB	BB	AB	AB	AB	BB	AA	AA		AB	AB	AA	AB	AB	BB	AA	AA	AA	AA	AA
1990	AX-89805240	AA	AA	BB	AB	AB	AB	BB	AB	AB	AB	BB	AB	BB	AA	AA	AB	BB	AA	BB	BB	AB	AB	BB	AB	AB	BB	BB	AA	BB	BB	AB	AB	BB	AB	BB	BB		AB	BB	BB	AB	AB	AB	BB	BB	BB	BB	BB
1991	AX-89837517	BB	BB	BB	BB	BB	BB	BB	AA	BB	BB	BB	BB	BB	BB	BB	BB	BB	BB	BB	BB	BB	BB	BB	BB	BB	BB	BB	BB	BB	NC	BB	BB	BB	BB	AB	BB		BB	BB	BB	BB	BB	BB	BB	BB	BB	BB	BB
1992	AX-89795523	AA	AA	BB	AA	AB	AA	BB	AB	AB	AA	BB	AB	BB	AA	AA	AB	BB	AB	BB	BB	AB	AB	BB	AB	AB	BB	BB	AA	BB	BB	AB	AB	BB	AA	AA	BB		AB	BB	BB	AB	AB	AB	BB	BB	BB	BB	BB
1993	AX-89837553	AB	BB	BB	AB	BB	AB	BB	AA	BB	AB	BB	BB	BB	AA	BB	BB	BB	BB	BB	BB	BB	BB	BB	BB	BB	BB	BB	BB	BB	NC	BB	BB	BB	AB	BB	BB		BB	BB	BB	BB	BB	BB	BB	BB	BB	BB	BB
1994	AX-89837857	AB	BB	AA	AA	AB	AA	AA	AA	AB	AA	AA	AB	AA	BB	BB	AB	AA	AB	AA	AA	AB	AB	AA	AB	AB	AA	AA	BB	AA	AA	AB	AB	AA	AA	AA	AA		AB	AA	AA	AB	AB	AB	AA	AA	AA	AA	AA
1995	AX-89795751	BB	BB	AA	BB	AB	BB	AA	BB	AB	BB	AA	AB	AA	BB	BB	AB	AA	AB	AA	AA	AB	AB	AA	AB	AB	AA	AA	BB	AA	AA	AB	AB	AA	BB	BB	AB		AB	AA	AA	AB	AB	AB	AA	AA	AA	AA	AA
1996	AX-89861948	BB	AA	AB	BB	AB	BB	AB	AB	AB	BB	AA	AA	AB	NC	AA	AB	AB	AA	AB	AB	AB	AA	AA	AA	AA	AB	AA	AA	AB	BB	AB	AA	AB	BB	BB	AA		AA	AA	AA	AA	AA	AB	AA	AA	AA	AA	AA
1997	AX-89796115	BB	BB	AB	BB	AB	BB	AA	BB	AB	BB	BB	BB	AA	BB	BB	AB	AA	BB	AB	AB	AB	BB	AB	BB	BB	AB	BB	BB	AB	AA	AA	BB	AB	BB	BB	BB		BB	BB	BB	BB	BB	AB	BB	BB	BB	BB	BB
1998	AX-89864254	AB	AA	AB	AA	AB	AB	AB	AB	AA	AA	AB	BB	AA	AA	AB	AB	AB	AB	AB	AB	AB	BB	AA	AA	AA	AA	AB	AA	AB	AA	AB	AB	AB	AA	AA	BB		BB	BB	AB	BB	BB	AB	AB	AB	BB	BB	BB
[truncated: 610 more rows]
[truncated: 534 more columns]

## Sheet: Pedigree and Phenotypic data
Name	Mother	Father	MpPheno
11.139-10	-	-	-
11.31-36	-	-	-
11.31-54	-	-	-
11.58-72	-	-	-
11.77-96	-	-	-
11.83-20	-	-	-
11.98-41	-	-	-
12.115-10	-	-	-
12.121-5	-	-	-
12.5-103	-	-	-
12.55-220	-	-	-
12.70-55	-	-	-
12.74-39	-	-	-
12.75-77	-	-	-
12.82-44	-	-	-
12.90-53	-	-	-
12.93-4	-	-	-
13.19-86	-	-	-
13.22-336	-	-	-
13.22-499	-	-	-
13.23-2	-	-	-
13.26-134	-	-	-
13.27-142	-	-	-
13.42-113	-	-	-
13.42-5	-	-	-
13.4-53	-	-	-
13.51-134	-	-	-
13.55-195	-	-	-
13.65-160	-	-	-
Camarosa	-	-	-
Elyana	-	-	-
FL_06-38	-	-	-
FL_10-121	-	-	-
FL_10-89	-	-	-
FL_10-92	-	-	-
Florida127	-	-	-
16.05-13	12.70-55	11.31-54	0
16.05-14	12.70-55	11.31-54	59.125
16.05-19	12.70-55	11.31-54	9.5
16.05-20	12.70-55	11.31-54	11.125
16.05-32	12.70-55	11.31-54	69
16.05-41	12.70-55	11.31-54	56.75
16.05-44	12.70-55	11.31-54	27.5
16.05-64	12.70-55	11.31-54	37.75
16.05-67	12.70-55	11.31-54	31
16.05-7	12.70-55	11.31-54	71.125
16.05-8	12.70-55	11.31-54	14.625
16.05-81	12.70-55	11.31-54	0
16.05-86	12.70-55	11.31-54	0
16.05-9	12.70-55	11.31-54	69
16.05-92	12.70-55	11.31-54	31
16.09-20	11.31-36	11.77-96	50.875
16.09-30	11.31-36	11.77-96	18.125
16.09-39	11.31-36	11.77-96	36.25
16.09-40	11.31-36	11.77-96	56.125
16.09-44	11.31-36	11.77-96	67.25
16.09-62	11.31-36	11.77-96	50.5
16.09-72	11.31-36	11.77-96	24.25
16.09-81	11.31-36	11.77-96	70.75
16.10-11	12.74-39	11.77-96	31.875
16.10-14	12.74-39	11.77-96	25.875
16.10-2	12.74-39	11.77-96	0
16.10-23	12.74-39	11.77-96	0
16.10-24	12.74-39	11.77-96	32.75
16.10-3	12.74-39	11.77-96	42.25
16.10-45	12.74-39	11.77-96	50
16.10-46	12.74-39	11.77-96	40.5
16.10-48	12.74-39	11.77-96	69
16.10-5	12.74-39	11.77-96	34.25
16.10-51	12.74-39	11.77-96	65.875
16.10-7	12.74-39	11.77-96	41.3333
16.10-9	12.74-39	11.77-96	69
16.11-103	Elyana	12.115-10	53.5
16.11-105	Elyana	12.115-10	45.75
16.11-25	Elyana	12.115-10	52.625
16.11-26	Elyana	12.115-10	63.75
16.11-29	Elyana	12.115-10	58.625
16.11-32	Elyana	12.115-10	56.75
16.11-33	Elyana	12.115-10	70.75
16.11-35	Elyana	12.115-10	25.875
16.11-37	Elyana	12.115-10	57
16.11-41	Elyana	12.115-10	49.125
16.11-42	Elyana	12.115-10	65.5
16.11-46	Elyana	12.115-10	48.625
16.11-48	Elyana	12.115-10	70.1667
16.11-50	Elyana	12.115-10	12.875
16.11-55	Elyana	12.115-10	37
16.11-64	Elyana	12.115-10	55.125
16.11-68	Elyana	12.115-10	50
16.11-72	Elyana	12.115-10	53.375
16.11-75	Elyana	12.115-10	34.5
16.11-76	Elyana	12.115-10	0
16.11-90	Elyana	12.115-10	55
16.13-12	12.55-220	12.121-5	56.125
16.13-124	12.55-220	12.121-5	70.75
16.13-136	12.55-220	12.121-5	31.75
16.13-158	12.55-220	12.121-5	76.75
16.13-160	12.55-220	12.121-5	43.875
16.13-161	12.55-220	12.121-5	62.625
16.13-162	12.55-220	12.121-5	83.125
16.13-182	12.55-220	12.121-5	56.125
16.13-34	12.55-220	12.121-5	40.5
16.13-45	12.55-220	12.121-5	22.375
16.13-48	12.55-220	12.121-5	0
16.13-58	12.55-220	12.121-5	67.25
16.13-64	12.55-220	12.121-5	15.5
16.13-69	12.55-220	12.121-5	54.375
16.13-70	12.55-220	12.121-5	74.25
16.13-79	12.55-220	12.121-5	69
16.13-93	12.55-220	12.121-5	76
16.15-11	13.22-499	12.5-103	0
16.15-2	13.22-499	12.5-103	18.125
16.15-21	13.22-499	12.5-103	51.75
16.15-23	13.22-499	12.5-103	70.75
16.15-26	13.22-499	12.5-103	27.5
16.15-3	13.22-499	12.5-103	28.5
16.15-34	13.22-499	12.5-103	67.25
16.15-36	13.22-499	12.5-103	32.75
16.15-4	13.22-499	12.5-103	47.375
16.15-5	13.22-499	12.5-103	74.25
16.17-118	11.83-20	12.55-220	21.375
16.17-121	11.83-20	12.55-220	22.5
16.17-133	11.83-20	12.55-220	67.25
16.17-148	11.83-20	12.55-220	23
16.17-152	11.83-20	12.55-220	56.1667
16.17-27	11.83-20	12.55-220	72.5
16.17-32	11.83-20	12.55-220	36.25
16.17-38	11.83-20	12.55-220	72.25
16.17-58	11.83-20	12.55-220	56.1667
16.17-81	11.83-20	12.55-220	68.75
16.18-112	12.90-53	12.55-220	45.625
16.18-137	12.90-53	12.55-220	76.125
16.18-140	12.90-53	12.55-220	74.625
16.18-152	12.90-53	12.55-220	68.75
16.18-169	12.90-53	12.55-220	63.75
16.18-29	12.90-53	12.55-220	70.75
16.18-36	12.90-53	12.55-220	70.75
16.18-37	12.90-53	12.55-220	58.25
16.18-41	12.90-53	12.55-220	60.375
16.18-45	12.90-53	12.55-220	74.25
16.18-47	12.90-53	12.55-220	42.25
16.18-48	12.90-53	12.55-220	55.125
16.18-52	12.90-53	12.55-220	70.75
16.18-56	12.90-53	12.55-220	74.25
16.18-73	12.90-53	12.55-220	62
16.18-82	12.90-53	12.55-220	47.375
16.18-9	12.90-53	12.55-220	35.25
16.18-91	12.90-53	12.55-220	74.25
16.18-94	12.90-53	12.55-220	49.3333
16.19-104	13.22-336	12.55-220	38.625
16.19-27	13.22-336	12.55-220	15.0625
16.19-32	13.22-336	12.55-220	37
16.19-45	13.22-336	12.55-220	47.375
16.19-54	13.22-336	12.55-220	72.5
16.19-69	13.22-336	12.55-220	49.125
16.19-74	13.22-336	12.55-220	63.75
16.19-80	13.22-336	12.55-220	24.1667
16.19-84	13.22-336	12.55-220	38.625
16.19-87	13.22-336	12.55-220	58.625
16.24-15	13.22-336	12.70-55	77.5
16.24-19	13.22-336	12.70-55	0
16.24-24	13.22-336	12.70-55	78.125
16.24-4	13.22-336	12.70-55	18.125
16.24-5	13.22-336	12.70-55	76.375
16.24-7	13.22-336	12.70-55	22.375
16.24-82	13.22-336	12.70-55	36.25
16.24-83	13.22-336	12.70-55	79.5
16.24-91	13.22-336	12.70-55	0
16.25-11	12.90-53	13.23-2	35.375
16.25-21	12.90-53	13.23-2	0
16.25-24	12.90-53	13.23-2	53.375
16.25-29	12.90-53	13.23-2	67.25
16.25-38	12.90-53	13.23-2	56.75
16.25-42	12.90-53	13.23-2	10.375
16.25-43	12.90-53	13.23-2	48.25
16.25-49	12.90-53	13.23-2	47.375
16.25-53	12.90-53	13.23-2	0
16.25-59	12.90-53	13.23-2	51.75
16.25-6	12.90-53	13.23-2	7.75
16.25-72	12.90-53	13.23-2	52.625
16.25-73	12.90-53	13.23-2	29.25
16.26-1	13.27-142	12.74-39	0
16.26-13	13.27-142	12.74-39	0
16.26-15	13.27-142	12.74-39	60.375
16.26-16	13.27-142	12.74-39	55.125
16.26-17	13.27-142	12.74-39	6
16.26-19	13.27-142	12.74-39	19.2
16.26-2	13.27-142	12.74-39	34.5
16.26-22	13.27-142	12.74-39	25.75
16.26-8	13.27-142	12.74-39	19.875
16.27-11	11.98-41	12.75-77	64.625
16.27-14	11.98-41	12.75-77	65.5
16.27-18	11.98-41	12.75-77	69
16.27-19	11.98-41	12.75-77	50.875
16.27-20	11.98-41	12.75-77	55.125
16.27-21	11.98-41	12.75-77	75.75
16.27-22	11.98-41	12.75-77	69
16.27-24	11.98-41	12.75-77	9.5
16.27-30	11.98-41	12.75-77	74
16.27-33	11.98-41	12.75-77	64.25
16.27-34	11.98-41	12.75-77	56.875
16.27-35	11.98-41	12.75-77	74.625
16.27-36	11.98-41	12.75-77	67.25
16.27-46	11.98-41	12.75-77	72.5
16.27-47	11.98-41	12.75-77	74.25
16.27-55	11.98-41	12.75-77	54.375
16.27-57	11.98-41	12.75-77	69
16.27-7	11.98-41	12.75-77	74.625
16.27-9	11.98-41	12.75-77	71.125
16.28-17	11.77-96	13.22-499	65.5
16.28-2	11.77-96	13.22-499	79.25
16.28-23	11.77-96	13.22-499	70.75
16.28-26	11.77-96	13.22-499	45.625
16.28-29	11.77-96	13.22-499	79.5
16.28-33	11.77-96	13.22-499	67.5
16.28-35	11.77-96	13.22-499	65.5
16.28-36	11.77-96	13.22-499	70.5
16.28-4	11.77-96	13.22-499	50.875
16.28-44	11.77-96	13.22-499	44.875
16.29-16	11.98-41	12.82-44	67.25
16.29-19	11.98-41	12.82-44	74.25
16.29-20	11.98-41	12.90-53	79.625
16.29-21	11.98-41	12.82-44	70.75
16.29-24	11.98-41	12.82-44	72.5
16.29-27	11.98-41	12.90-53	72.5
16.29-31	11.98-41	12.82-44	57.25
16.29-33	11.98-41	12.82-44	67.375
16.29-35	11.98-41	12.82-44	74.625
16.29-36	11.98-41	12.82-44	62
16.29-37	11.98-41	12.90-53	72.875
16.29-40	11.98-41	12.82-44	48.125
16.29-42	11.98-41	12.90-53	51.625
16.29-43	11.98-41	12.82-44	63.75
16.29-45	11.98-41	12.82-44	50.625
16.29-50	11.98-41	12.90-53	44
16.29-57	11.98-41	12.82-44	84.625
16.29-60	11.98-41	12.82-44	65.875
16.36-13	13.42-5	13.22-336	79.25
16.36-16	13.42-5	13.22-336	53.8333
16.36-18	13.42-5	13.22-336	67.25
16.36-21	13.42-5	13.22-336	69
16.36-22	13.42-5	13.22-336	22.375
16.36-41	13.42-5	13.22-336	62
16.36-43	13.42-5	13.22-336	72.5
16.36-5	13.42-5	13.22-336	72.5
16.36-50	13.42-5	13.22-336	69
16.36-58	13.42-5	13.22-336	70.75
16.36-6	13.42-5	13.22-336	58.5
16.36-62	13.42-5	13.22-336	77.75
16.36-65	13.42-5	13.22-336	63.75
16.36-74	13.42-5	13.22-336	70.75
16.36-77	13.42-5	13.22-336	54.125
16.36-78	13.42-5	13.22-336	62.125
16.36-79	13.42-5	13.22-336	72.5
16.36-9	13.42-5	13.22-336	63.875
16.38-14	FL_10-121	13.22-336	56.875
16.38-2	FL_10-121	13.22-336	62
16.38-25	FL_10-121	13.22-336	72.875
16.38-40	FL_10-121	13.22-336	34.5
16.38-45	FL_10-121	13.22-336	22.25
16.38-56	FL_10-121	13.22-336	72.5
16.38-63	FL_10-121	13.22-336	42.125
16.38-79	FL_10-121	13.22-336	45.625
16.38-83	FL_10-121	13.22-336	38.875
16.40-100	13.51-134	13.27-142	27.625
16.40-16	13.51-134	13.27-142	21.375
16.40-30	13.51-134	13.27-142	65.5
16.40-40	13.51-134	13.27-142	37.125
16.40-44	13.51-134	13.27-142	47.375
16.40-5	13.51-134	13.27-142	14.625
16.40-8	13.51-134	13.27-142	18.875
16.40-91	13.51-134	13.27-142	32.75
16.40-92	13.51-134	13.27-142	0
16.40-94	13.51-134	13.27-142	55
16.41-13	FL_10-92	13.27-142	67.25
16.41-14	FL_10-92	13.27-142	60
16.41-16	FL_10-92	13.27-142	38.75
16.41-2	FL_10-92	13.27-142	21.8333
16.41-24	FL_10-92	13.27-142	60.375
16.41-27	FL_10-92	13.27-142	48.25
16.41-36	FL_10-92	13.27-142	43.875
16.41-37	FL_10-92	13.27-142	31
16.41-52	FL_10-92	13.27-142	58.5
16.41-55	FL_10-92	13.27-142	82
16.44-18	11.58-72	13.42-113	47.375
16.44-21	11.58-72	13.42-113	47.375
16.44-32	11.58-72	13.42-113	29.25
16.44-50	11.58-72	13.42-113	25.875
16.44-52	11.58-72	13.42-113	18.125
16.44-54	11.58-72	13.42-113	18.125
16.47-11	Florida127	13.42-113	49.875
16.47-14	Florida127	13.42-113	74.25
16.47-20	Florida127	13.42-113	56.875
16.47-21	Florida127	13.42-113	65.5
16.47-26	Florida127	13.42-113	45.625
16.47-27	Florida127	13.42-113	25.75
16.47-30	Florida127	13.42-113	31
16.47-33	Florida127	13.42-113	69
16.47-42	Florida127	13.42-113	45.625
16.47-45	Florida127	13.42-113	43.875
16.47-47	Florida127	13.42-113	65.5
16.47-48	Florida127	13.42-113	63.625
16.47-57	Florida127	13.42-113	75.75
16.47-58	Florida127	13.42-113	7.75
16.47-59	Florida127	13.42-113	12.875
16.47-60	Florida127	13.42-113	37.125
16.47-63	Florida127	13.42-113	67.25
16.47-66	Florida127	13.42-113	60.25
16.47-9	Florida127	13.42-113	24.125
16.49-1	12.55-220	11.31-54	0
16.49-10	12.55-220	11.31-54	72.5
16.49-103	12.55-220	11.31-54	74.25
16.49-107	12.55-220	11.31-54	67.25
16.49-113	12.55-220	11.31-54	36.625
16.49-140	12.55-220	11.31-54	69
16.49-27	12.55-220	11.31-54	67.8333
16.49-32	12.55-220	11.31-54	12.875
16.49-54	12.55-220	11.31-54	0
16.49-55	12.55-220	11.31-54	12.875
16.49-62	12.55-220	11.31-54	16.375
16.49-67	12.55-220	11.31-54	52.625
16.49-72	12.55-220	11.31-54	57
16.49-73	12.55-220	11.31-54	62
16.49-8	12.55-220	11.31-54	60.25
16.49-81	12.55-220	11.31-54	65.5
16.49-83	12.55-220	11.31-54	36.25
16.49-93	12.55-220	11.31-54	0
16.50-17	11.139-10	13.4-53	28.5
16.50-2	11.139-10	13.4-53	21.8333
16.50-22	11.139-10	13.4-53	52.625
16.50-23	11.139-10	13.4-53	14.625
16.50-26	11.139-10	13.4-53	76.375
16.50-38	11.139-10	13.4-53	53.375
16.50-39	11.139-10	13.4-53	72.25
16.50-4	11.139-10	13.4-53	72.5
16.50-50	11.139-10	13.4-53	36.25
16.50-8	11.139-10	13.4-53	62.125
16.52-100	FL_06-38	13.22-499	38.75
16.52-103	FL_06-38	13.22-499	76.375
16.52-116	FL_06-38	13.22-499	76
16.52-126	FL_06-38	13.22-499	60.5
16.52-131	FL_06-38	13.22-499	69
16.52-133	FL_06-38	13.22-499	72.5
16.52-136	FL_06-38	13.22-499	72
16.52-25	FL_06-38	13.22-499	67
16.52-34	FL_06-38	13.22-499	63.75
16.52-35	FL_06-38	13.22-499	61.125
16.52-40	FL_06-38	13.22-499	72.5
16.52-53	FL_06-38	13.22-499	19.875
16.52-73	FL_06-38	13.22-499	62.125
16.52-85	FL_06-38	13.22-499	63.75
16.52-88	FL_06-38	13.22-499	72.5
16.52-97	FL_06-38	13.22-499	79.875
16.54-162	11.77-96	13.55-195	77.5
16.54-18	11.77-96	13.55-195	77.5
16.54-2	11.77-96	13.55-195	39.75
16.54-21	11.77-96	13.55-195	60
16.54-26	11.77-96	13.55-195	74
16.54-33	11.77-96	13.55-195	77.5
16.54-49	11.77-96	13.55-195	68.75
16.54-5	11.77-96	13.55-195	86.3333
16.54-57	11.77-96	13.55-195	72.5
16.54-62	11.77-96	13.55-195	60.25
16.54-64	11.77-96	13.55-195	70.75
16.54-70	11.77-96	13.55-195	74.25
16.54-75	11.77-96	13.55-195	83.75
16.54-8	11.77-96	13.55-195	69
16.54-83	11.77-96	13.55-195	72.5
16.54-9	11.77-96	13.55-195	69
16.54-90	11.77-96	13.55-195	72.875
16.54-99	11.77-96	13.55-195	69
16.55-13	12.93-4	13.55-195	49.125
16.55-14	12.93-4	13.55-195	72.25
16.55-17	12.93-4	13.55-195	74.25
16.55-23	12.93-4	13.55-195	76.375
16.55-26	12.93-4	13.55-195	60.375
16.55-33	12.93-4	13.55-195	65.5
16.55-35	12.93-4	13.55-195	79.25
16.55-54	12.93-4	13.55-195	70.75
16.55-55	12.93-4	13.55-195	72.5
16.55-56	12.93-4	13.55-195	57.875
16.55-65	12.93-4	13.55-195	71.125
16.55-66	12.93-4	13.55-195	67.25
16.55-68	12.93-4	13.55-195	78.125
16.55-69	12.93-4	13.55-195	77.5
16.55-7	12.93-4	13.55-195	57
16.55-72	12.93-4	13.55-195	39.1667
16.55-73	12.93-4	13.55-195	49.125
16.55-8	12.93-4	13.55-195	70.75
16.56-107	Elyana	Camarosa	54.375
16.56-114	Elyana	Camarosa	67.25
16.56-13	Elyana	Camarosa	69
16.56-15	Elyana	Camarosa	69
16.56-16	Elyana	Camarosa	69
16.56-18	Elyana	Camarosa	38.75
16.56-19	Elyana	Camarosa	40.5
16.56-21	Elyana	Camarosa	65.5
16.56-27	Elyana	Camarosa	49.125
16.56-29	Elyana	Camarosa	68.75
16.56-30	Elyana	Camarosa	48.25
16.56-31	Elyana	Camarosa	74
16.56-5	Elyana	Camarosa	45.625
16.56-57	Elyana	Camarosa	72.5
16.56-60	Elyana	Camarosa	70.75
16.56-61	Elyana	Camarosa	42.25
16.56-65	Elyana	Camarosa	38.875
16.56-66	Elyana	Camarosa	60.375
16.56-67	Elyana	Camarosa	74.25
16.56-75	Elyana	Camarosa	50.875
16.56-77	Elyana	Camarosa	16.375
16.56-79	Elyana	Camarosa	44
16.56-83	Elyana	Camarosa	72.5
16.56-86	Elyana	Camarosa	65.875
16.56-88	Elyana	Camarosa	67.25
16.56-95	Elyana	Camarosa	54.375
16.57-110	11.98-41	FL_10-89	72.5
16.57-117	11.98-41	FL_10-89	42.125
16.57-43	11.98-41	FL_10-89	42.25
16.57-72	11.98-41	FL_10-89	63.1667
16.57-82	11.98-41	FL_10-89	29.25
16.58-10	12.121-5	FL_10-89	73.75
16.58-17	12.121-5	FL_10-89	72.5
16.58-19	12.121-5	FL_10-89	79
16.58-20	12.121-5	FL_10-89	78.125
16.58-27	12.121-5	FL_10-89	34.5
16.58-28	12.121-5	FL_10-89	60.375
16.58-32	12.121-5	FL_10-89	51.25
16.58-33	12.121-5	FL_10-89	9.5
16.58-34	12.121-5	FL_10-89	0
16.58-39	12.121-5	FL_10-89	25.875
16.58-42	12.121-5	FL_10-89	0
16.58-50	12.121-5	FL_10-89	49.125
16.58-55	12.121-5	FL_10-89	36.25
16.58-59	12.121-5	FL_10-89	16.375
16.58-67	12.121-5	FL_10-89	0
16.58-68	12.121-5	FL_10-89	0
16.58-81	12.121-5	FL_10-89	0
16.58-84	12.121-5	FL_10-89	49.125
16.58-85	12.121-5	FL_10-89	27.5
16.58-87	12.121-5	FL_10-89	45.625
16.58-9	12.121-5	FL_10-89	0
16.59-37	12.90-53	11.31-54	72.5
16.59-60	12.90-53	11.31-54	29.25
16.59-64	12.90-53	11.31-54	16.375
16.59-9	12.90-53	11.31-54	45.625
16.60-107	11.58-72	FL_10-121	40.5
16.60-110	11.58-72	FL_10-121	18.125
16.60-144	11.58-72	FL_10-121	0
16.60-145	11.58-72	FL_10-121	45.625
16.60-152	11.58-72	FL_10-121	43.6667
16.60-22	11.58-72	FL_10-121	0
16.60-29	11.58-72	FL_10-121	7.75
16.60-4	11.58-72	FL_10-121	18.125
16.60-47	11.58-72	FL_10-121	56.5
16.60-52	11.58-72	FL_10-121	63.75
16.60-57	11.58-72	FL_10-121	31
16.60-73	11.58-72	FL_10-121	12.875
16.60-96	11.58-72	FL_10-121	31
16.65-10	11.139-10	13.26-134	36.25
16.65-14	11.139-10	13.26-134	74.25
16.65-15	11.139-10	13.26-134	61.75
16.65-16	11.139-10	13.26-134	0
16.65-17	11.139-10	13.26-134	18.125
16.65-2	11.139-10	13.26-134	56.875
16.65-22	11.139-10	13.26-134	74.25
16.65-25	11.139-10	13.26-134	47.375
16.65-29	11.139-10	13.26-134	36.6667
16.65-31	11.139-10	13.26-134	14.625
16.69-10	13.26-134	13.65-160	27.375
16.69-103	13.26-134	13.65-160	7.75
16.69-116	13.26-134	13.65-160	18.125
16.69-118	13.26-134	13.65-160	42.125
16.69-123	13.26-134	13.65-160	19
16.69-128	13.26-134	13.65-160	49.125
16.69-133	13.26-134	13.65-160	25.75
16.69-149	13.26-134	13.65-160	0
16.69-153	13.26-134	13.65-160	44.375
16.69-159	13.26-134	13.65-160	67.25
16.69-17	13.26-134	13.65-160	44.375
16.69-28	13.26-134	13.65-160	61.125
16.69-4	13.26-134	13.65-160	45.5
16.69-63	13.26-134	13.65-160	43.75
16.69-70	13.26-134	13.65-160	0
16.69-92	13.26-134	13.65-160	62
16.70-10	13.26-134	12.55-220	46.5
16.70-156	13.26-134	12.55-220	70.1667
16.70-158	13.26-134	12.55-220	35.375
16.70-170	13.26-134	12.55-220	44
16.70-186	13.26-134	12.55-220	9.5
16.70-189	13.26-134	12.55-220	24
16.70-193	13.26-134	12.55-220	63.75
16.70-2	13.26-134	12.55-220	34.5
16.70-233	13.26-134	12.55-220	25.875
16.70-234	13.26-134	12.55-220	62
16.70-235	13.26-134	12.55-220	29.25
16.70-236	13.26-134	12.55-220	51.75
16.70-241	13.26-134	12.55-220	18.125
16.70-251	13.26-134	12.55-220	25.75
16.70-29	13.26-134	12.55-220	42.375
16.70-38	13.26-134	12.55-220	0
16.70-63	13.26-134	12.55-220	45.625
16.70-67	13.26-134	12.55-220	29.25
16.70-72	13.26-134	12.55-220	0
16.70-75	13.26-134	12.55-220	20.625
16.70-79	13.26-134	12.55-220	16.375
16.70-8	13.26-134	12.55-220	55.125
16.70-83	13.26-134	12.55-220	18.125
16.70-87	13.26-134	12.55-220	65.5
16.71-12	13.65-160	13.42-113	34.5
16.71-17	13.65-160	13.42-113	39.5
16.71-22	13.65-160	13.42-113	65.5
16.71-26	13.65-160	13.42-113	77.5
16.71-32	13.65-160	13.42-113	65.5
16.71-36	13.65-160	13.42-113	44.75
16.71-41	13.65-160	13.42-113	14.625
16.71-5	13.65-160	13.42-113	72.5
16.71-7	13.65-160	13.42-113	32.75
16.73a-113	12.90-53	13.26-134	47.375
16.73a-124	12.90-53	13.26-134	18.125
16.73a-19	12.90-53	13.26-134	48
16.73a-6	12.90-53	13.26-134	25.75
16.73a-61	12.90-53	13.26-134	0
16.73a-77	12.90-53	13.26-134	34.3333
16.73b-100	11.83-20	12.90-53	34.5
16.73b-33	11.83-20	12.90-53	51.75
16.73b-34	11.83-20	12.90-53	74.25
16.73b-47	11.83-20	12.90-53	74.25
16.73b-86	11.83-20	12.90-53	62
16.73b-89	11.83-20	12.90-53	58.5
16.73c-114	11.83-20	13.26-134	32.75
16.73c-24	11.83-20	13.26-134	18.125
16.73c-32	11.83-20	13.26-134	62.125
16.73c-65	11.83-20	13.26-134	55
16.73c-88	11.83-20	13.26-134	56.125
16.74a-11	12.90-53	Florida127	76
16.74a-15	12.90-53	Florida127	79.625
16.74a-19	12.90-53	Florida127	42.375
16.74a-23	12.90-53	Florida127	34.5
16.74a-27	12.90-53	Florida127	78.125
16.74a-34	12.90-53	Florida127	76
16.74a-35	12.90-53	Florida127	27.0833
16.74a-5	12.90-53	Florida127	63.75
16.74b-2	12.90-53	13.19-86	77.1667
16.74b-20	12.90-53	13.19-86	72.5
16.76-48	FL_10-121	12.5-103	6
16.76-52	FL_10-121	12.5-103	47.375
16.76-62	FL_10-121	12.5-103	54.375
16.76-66	FL_10-121	12.5-103	60.25
16.76-81	FL_10-121	12.5-103	29.25
16.76-89	FL_10-121	12.5-103	69
16.77-18	12.70-55	12.5-103	77.875
16.77-19	12.70-55	12.5-103	0
16.77-2	12.70-55	12.5-103	65.5
16.77-31	12.70-55	12.5-103	50.875
16.77-32	12.70-55	12.5-103	66
16.77-44	12.70-55	12.5-103	77.875
16.77-56	12.70-55	12.5-103	46
16.77-75	12.70-55	12.5-103	45.625
16.77-80	12.70-55	12.5-103	72.5
16.77-85	12.70-55	12.5-103	33.5
16.77-87	12.70-55	12.5-103	27.5
16.81-102	12.121-5	11.31-54	0
16.81-103	12.121-5	11.31-54	12.875
16.81-109	12.121-5	11.31-54	50.875
16.81-112	12.121-5	11.31-54	47.375
16.81-123	12.121-5	11.31-54	55.125
16.81-124	12.121-5	11.31-54	6
16.81-136	12.121-5	11.31-54	67.25
16.81-151	12.121-5	11.31-54	6
16.81-16	12.121-5	11.31-54	56.875
16.81-19	12.121-5	11.31-54	5.83333
16.81-22	12.121-5	11.31-54	42.25
16.81-28	12.121-5	11.31-54	31
16.81-33	12.121-5	11.31-54	74.25
16.81-35	12.121-5	11.31-54	31
16.81-36	12.121-5	11.31-54	41.875
16.81-62	12.121-5	11.31-54	12.875
16.81-66	12.121-5	11.31-54	35.375
16.81-73	12.121-5	11.31-54	60.375
16.81-85	12.121-5	11.31-54	36.25
16.81-86	12.121-5	11.31-54	76.375

## Sheet: Genetic map
Probeset ID	Chromosome	Position
AX-89817638	1A	0.008
AX-89847026	1A	4.096
AX-89873775	1A	4.843
AX-89875355	1A	5.591
AX-89818190	1A	6.31
AX-89779953	1A	7.029
AX-89779969	1A	7.029
AX-89818271	1A	8.661
AX-89847095	1A	8.966
AX-89780165	1A	9.119
AX-89818339	1A	9.271
AX-89818370	1A	9.271
AX-89818443	1A	9.881
AX-89778563	1AII	0
AX-89779079	1AII	0
AX-89904153	1AII	0
AX-89846905	1AII	0
AX-89816836	1AII	0
AX-89816167	1AII	0
AX-89816862	1AII	0
AX-89846929	1AII	0.462
AX-89846768	1AII	0.924
AX-89904072	1AII	1.854
AX-89778507	1AII	1.854
AX-89780890	1AII	1.854
AX-89815980	1AII	1.854
AX-89904325	1AII	1.854
AX-89904317	1AII	1.854
AX-89806416	1AII	1.854
AX-89816060	1AII	1.854
AX-89846800	1AII	1.854
AX-89806322	1AII	1.854
AX-89847200	1AII	1.854
AX-89816038	1AII	1.854
AX-89856704	1AII	1.854
AX-89816132	1AII	1.854
AX-89778437	1AII	1.854
AX-89846786	1AII	1.854
AX-89815968	1AII	1.854
AX-89847008	1AII	1.854
AX-89778400	1AII	1.854
AX-89873042	1AII	1.854
AX-89874575	1AII	1.854
AX-89819269	1AII	1.854
AX-89873195	1AII	1.854
AX-89815996	1AII	1.854
AX-89815972	1AII	1.854
AX-89778453	1AII	1.854
AX-89847011	1AII	1.854
AX-89872301	1AII	1.854
AX-89847172	1AII	1.854
AX-89819187	1AII	1.854
AX-89816011	1AII	1.854
AX-89815869	1AII	2.784
AX-89778350	1AII	2.784
AX-89846927	1AII	3.246
AX-89846919	1AII	3.246
AX-89816897	1AII	3.246
AX-89778621	1AII	3.246
AX-89816930	1AII	3.246
AX-89904163	1AII	3.246
AX-89873314	1AII	3.246
AX-89778385	1AII	3.246
AX-89873018	1AII	3.246
AX-89846932	1AII	3.246
AX-89816940	1AII	3.246
AX-89779160	1AII	3.246
AX-89816370	1AII	4.955
AX-89846883	1AII	5.107
AX-89873779	1AII	5.26
AX-89816690	1AII	5.26
AX-89778764	1AII	5.26
AX-89873781	1AII	5.26
AX-89778982	1AII	5.26
AX-89873473	1AII	5.26
AX-89873545	1AII	5.564
AX-89816461	1AII	6.174
AX-89904186	1AII	7.405
AX-89874272	1AII	7.405
AX-89904181	1AII	7.405
AX-89779223	1AII	7.71
AX-89846953	1AII	7.71
AX-89817124	1AII	7.71
AX-89806390	1AII	8.636
AX-89778963	1AII	9.871
AX-89803108	1AII	10.789
AX-89778898	1AII	10.789
AX-89816532	1AII	11.707
AX-89910600	1B	1.225
AX-89875638	1B	1.835
AX-89818534	1B	1.835
AX-89780362	1B	1.835
AX-89818407	1B	5.649
AX-89818313	1B	5.649
AX-89806497	1B	5.649
AX-89779945	1B	6.258
AX-89875249	1B	6.258
AX-89875399	1B	6.258
AX-89818101	1B	6.258
AX-89779985	1B	6.565
AX-89875083	1B	7.177
AX-89780119	1B	8.399
AX-89779051	1B	9.317
AX-89847854	1B	10.232
AX-89817680	1B	10.537
AX-89818628	1B	12.077
AX-89874754	1B	12.229
AX-89875289	1B	12.381
AX-89817763	1B	13.3
AX-89779715	1B	13.452
AX-89779710	1B	13.605
AX-89779648	1B	13.605
AX-89779599	1B	14.522
AX-89779594	1B	14.522
AX-89817549	1B	14.522
AX-89817616	1B	14.522
AX-89812597	1B	14.587
AX-89812277	1B	14.739
AX-89817193	1B	15.232
AX-89846863	1B	16.967
AX-89875513	1B	19.432
AX-89875598	1B	20.042
AX-89780478	1B	21.894
AX-89818644	1B	21.894
AX-89780488	1B	21.894
AX-89780608	1B	24.988
AX-89780557	1B	24.988
AX-89818863	1B	26.208
AX-89847162	1B	28.655
AX-89780734	1B	28.655
AX-89818985	1B	28.655
AX-89819083	1B	28.655
AX-89818982	1B	28.655
AX-89816562	1B	37.733
AX-89803100	1B	37.733
AX-89778942	1B	40.195
AX-89816632	1B	40.195
AX-89778980	1B	41.422
AX-89779111	1B	41.422
AX-89806368	1B	42.649
AX-89779245	1B	43.259
AX-89846971	1B	43.259
AX-89817175	1B	43.259
AX-89779298	1B	43.259
AX-89873797	1B	45.713
AX-89779032	1B	47.55
AX-89816194	1B	50.622
AX-89867447	1B	52.458
AX-89815243	1B	54.295
AX-89778394	1B	54.295
AX-89778366	1B	54.905
AX-89778532	1B	61.366
AX-89779486	1B	65.078
AX-89819276	1B	67.563
AX-89780853	1B	68.172
AX-89815995	1B	68.172
AX-89780868	1B	68.172
AX-89817418	1B	68.172
AX-89778417	1B	68.172
AX-89778455	1B	68.172
AX-89780871	1B	68.172
AX-89873136	1B	68.172
AX-89816002	1B	68.172
AX-89873075	1B	68.172
AX-89860456	1B	68.782
AX-89778344	1B	68.782
AX-89780891	1B	68.782
AX-89779915	1C	0
AX-89803248	1C	0
AX-89818495	1C	0
AX-89818075	1C	0
AX-89780280	1C	0
AX-89780309	1C	0
AX-89818448	1C	0
AX-89779690	1C	0
AX-89874843	1C	0
AX-89874851	1C	0
AX-89816416	1CII	1.243
AX-89873799	1CII	3.087
AX-89816838	1CII	4.002
AX-89779088	1CII	4.002
AX-89779080	1CII	4.611
AX-89846899	1CII	5.53
AX-89811571	1CII	5.835
AX-89816179	1CII	5.835
AX-89846828	1CII	7.972
AX-89816922	1CII	7.987
AX-89803150	1CII	9.206
AX-89779152	1CII	9.206
AX-89779173	1CII	9.511
AX-89815932	1CII	9.816
AX-89846807	1CII	13.878
AX-89873099	1CII	17.608
AX-89815831	1CII	18.526
AX-89876343	1CII	19.135
AX-89780892	1CII	20.049
AX-89819177	1CII	21.033
AX-89817431	1CII	21.266
AX-89874790	1D	0
AX-89862714	1D	0
AX-89817745	1D	0.305
AX-89817998	1D	0.305
AX-89910397	1D	0.61
AX-89779603	1D	1.076
AX-89817553	1D	1.542
AX-89779044	1D	7.737
AX-89780112	1D	10.392
AX-89779998	1D	12.155
AX-89875352	1D	13.374
AX-89780159	1D	13.991
AX-89874624	1D	17.063
AX-89778381	1DII	3.86
AX-89816904	1DII	4.623
AX-89816173	1DII	7.534
AX-89815887	1DII	7.839
AX-89778514	1DII	9.68
AX-89816066	1DII	9.985
AX-89856696	1DII	9.985
AX-89815824	1DII	12.446
AX-89815993	1DII	18.59
AX-89819263	1DII	19.809
AX-89855279	2A	0
AX-89821260	2A	0
AX-89782475	2A	0
AX-89851508	2A	0
AX-89907485	2A	0.08
AX-89821256	2A	0.304
AX-89847379	2A	0.304
AX-89821241	2A	0.304
AX-89821253	2A	0.304
AX-89782477	2A	0.304
AX-89782469	2A	0.304
AX-89821160	2A	1.851
AX-89904487	2A	1.851
AX-89821174	2A	1.851
AX-89782459	2A	1.851
AX-89821195	2A	1.851
AX-89862918	2A	2.461
AX-89904485	2A	2.461
AX-89782385	2A	2.461
AX-89821225	2A	2.614
AX-89821108	2A	2.766
AX-89821141	2A	3.403
AX-89872337	2A	3.403
AX-89821206	2A	3.403
AX-89806705	2A	4.913
AX-89821000	2A	4.913
AX-89904482	2A	4.913
AX-89904479	2A	4.913
AX-89904478	2A	5.218
AX-89782346	2A	5.218
AX-89821031	2A	5.218
AX-89904476	2A	5.218
AX-89806701	2A	5.218
AX-89821017	2A	5.218
AX-89847360	2A	5.218
AX-89847361	2A	5.218
AX-89782368	2A	5.301
AX-89782345	2A	5.384
AX-89782336	2A	5.522
AX-89904477	2A	6.132
AX-89904474	2A	6.132
AX-89904543	2A	7.05
AX-89782970	2A	7.05
AX-89783072	2A	7.05
AX-89821929	2A	7.05
AX-89820994	2A	7.05
AX-89783025	2A	8.29
AX-89847448	2A	8.582
AX-89822094	2A	8.582
AX-89822051	2A	8.582
AX-89879229	2A	8.887
AX-89783049	2A	8.887
AX-89878887	2A	9.334
AX-89904531	2A	9.449
AX-89821933	2A	9.494
AX-89806756	2A	9.494
AX-89782982	2A	9.494
AX-89879089	2A	9.494
AX-89782920	2A	9.494
AX-89847433	2A	9.494
AX-89815340	2A	9.494
AX-89821949	2A	9.494
AX-89782866	2A	9.494
AX-89847421	2A	9.494
AX-89821925	2A	9.647
AX-89821756	2A	9.647
AX-89821986	2A	9.799
AX-89911394	2A	9.799
AX-89907565	2A	10.409
AX-89911393	2A	10.409
AX-89781458	2A	20.409
AX-89819967	2A	20.409
AX-89819610	2A	20.561
AX-89781474	2A	20.714
AX-89820000	2A	20.714
AX-89806623	2A	20.714
AX-89877123	2A	20.714
AX-89877108	2A	20.714
AX-89820031	2A	20.714
AX-89819986	2A	20.714
AX-89819987	2A	20.714
AX-89781173	2A	20.714
AX-89781209	2A	20.714
AX-89820002	2A	20.714
AX-89819971	2A	21.019
AX-89819974	2A	21.171
AX-89819973	2A	21.171
AX-89781443	2A	21.324
AX-89819938	2A	21.324
AX-89819940	2A	21.324
AX-89781429	2A	21.933
AX-89819903	2A	22.547
AX-89904385	2A	22.657
AX-89819901	2A	22.767
AX-89781417	2A	22.877
AX-89851331	2A	22.987
AX-89819856	2A	23.552
AX-89847267	2A	23.662
AX-89781383	2A	23.772
AX-89803470	2A	23.882
AX-89819829	2A	24.071
AX-89819809	2A	24.071
AX-89781359	2A	24.071
AX-89819822	2A	24.071
AX-89803464	2A	24.071
AX-89862827	2A	24.071
AX-89819724	2A	24.986
AX-89781293	2A	24.986
AX-89781292	2A	24.986
AX-89819749	2A	24.986
AX-89876824	2A	24.986
AX-89819756	2A	24.986
AX-89819712	2A	25.599
AX-89781286	2A	25.904
AX-89806607	2A	25.904
AX-89862840	2A	28.326
AX-89877192	2A	28.326
AX-89819660	2A	28.326
AX-89781220	2A	28.401
AX-89781615	2A	28.401
AX-89781587	2A	28.401
AX-89781605	2A	28.401
AX-89820126	2A	28.401
AX-89877196	2A	28.401
AX-89872316	2A	28.707
AX-89877232	2A	28.707
AX-89781556	2A	29.014
AX-89820069	2A	29.014
AX-89820066	2A	29.014
AX-89877186	2A	29.014
AX-89820068	2A	29.319
AX-89904397	2A	29.319
AX-89820196	2A	31.804
AX-89847304	2A	31.804
AX-89847303	2A	31.804
AX-89815321	2A	31.804
AX-89904418	2A	32.414
AX-89806640	2A	32.414
AX-89781741	2A	32.414
AX-89820278	2A	32.414
AX-89820153	2A	32.414
AX-89847314	2A	33.024
AX-89781753	2A	33.024
AX-89820329	2A	33.024
AX-89781387	2B	0
AX-89819865	2B	0
AX-89876996	2B	0
AX-89781380	2B	0
AX-89781401	2B	0
AX-89819858	2B	0
AX-89819839	2B	0.305
AX-89781374	2B	0.305
AX-89847257	2B	1.833
AX-89904380	2B	1.833
AX-89847259	2B	1.833
AX-89781312	2B	1.833
AX-89781306	2B	1.833
AX-89847260	2B	1.833
AX-89847256	2B	1.833
AX-89819783	2B	1.833
AX-89819781	2B	1.833
AX-89820186	2B	1.833
AX-89819790	2B	1.833
AX-89781693	2B	1.833
AX-89819726	2B	2.447
AX-89819738	2B	2.447
AX-89781279	2B	2.447
AX-89904371	2B	2.447
AX-89876838	2B	2.447
AX-89819696	2B	2.751
AX-89819714	2B	2.751
AX-89819698	2B	3.056
AX-89781596	2B	3.975
AX-89847248	2B	3.975
AX-89847284	2B	4.901
AX-89781559	2B	4.901
AX-89820079	2B	4.901
AX-89877163	2B	5.206
AX-89781656	2B	5.206
AX-89904405	2B	5.206
AX-89847295	2B	5.206
AX-89847282	2B	5.206
AX-89781641	2B	5.206
AX-89781646	2B	5.206
AX-89820175	2B	5.206
AX-89781539	2B	5.206
AX-89820051	2B	5.206
AX-89820166	2B	5.206
AX-89781662	2B	5.206
AX-89820044	2B	5.206
AX-89820194	2B	5.206
AX-89820142	2B	5.206
AX-89820178	2B	5.206
AX-89781531	2B	5.206
AX-89867615	2B	5.206
AX-89820220	2B	5.511
AX-89781677	2B	5.511
AX-89781684	2B	5.511
AX-89781695	2B	5.511
AX-89904414	2B	5.815
AX-89867638	2B	5.815
AX-89877347	2B	5.815
AX-89820242	2B	5.815
AX-89781714	2B	5.815
AX-89781700	2B	5.815
AX-89781712	2B	5.815
AX-89820241	2B	5.815
AX-89781728	2B	5.815
AX-89877398	2B	6.12
AX-89820277	2B	6.12
AX-89820327	2B	7.35
AX-89820316	2B	7.35
AX-89781765	2B	7.355
AX-89781999	2B	9.519
AX-89877816	2B	9.519
AX-89782096	2B	9.519
AX-89820590	2B	9.519
AX-89820594	2B	9.519
AX-89820566	2B	9.519
AX-89782078	2B	9.519
AX-89782015	2B	9.519
AX-89782087	2B	9.519
AX-89820620	2B	10.023
AX-89877805	2B	10.638
AX-89782066	2B	10.736
AX-89820655	2B	10.736
AX-89782063	2B	10.736
AX-89907400	2B	10.736
AX-89820573	2B	10.736
AX-89781987	2B	10.736
AX-89820685	2B	10.736
AX-89782027	2B	10.736
AX-89847334	2B	10.736
AX-89782013	2B	10.736
AX-89782036	2B	10.736
AX-89847337	2B	11.041
AX-89904445	2B	11.651
AX-89820542	2B	11.651
AX-89781915	2B	12.265
AX-89781953	2B	12.265
AX-89847328	2B	12.265
AX-89781933	2B	12.265
AX-89867663	2B	12.265
AX-89781949	2B	12.265
AX-89820502	2B	12.265
AX-89820489	2B	12.265
AX-89904441	2B	12.265
AX-89904435	2B	12.265
AX-89820492	2B	12.265
AX-89820352	2B	12.874
AX-89862866	2B	12.874
AX-89820412	2B	12.874
AX-89781814	2B	12.874
AX-89820363	2B	12.874
AX-89847324	2B	12.874
AX-89781802	2B	12.874
AX-89781796	2B	12.874
AX-89781821	2B	12.874
AX-89781793	2B	12.874
AX-89781881	2B	12.874
AX-89820435	2B	12.874
AX-89819816	2B	32.378
AX-89806649	2B	54.229
AX-89822700	2BII	0
AX-89783428	2BII	2.77
AX-89822411	2BII	2.77
AX-89822643	2BII	2.77
AX-89783417	2BII	2.77
AX-89822657	2BII	2.77
AX-89822413	2BII	2.77
AX-89823410	2BII	6.55
AX-89823113	2BII	6.855
AX-89783379	2BII	7.465
AX-89819859	2BII	7.465
AX-89822523	2BII	7.465
AX-89822632	2BII	7.465
AX-89784029	2BII	7.465
AX-89781652	2BII	7.465
AX-89783860	2BII	7.465
AX-89879820	2BII	7.465
AX-89819673	2BII	7.465
AX-89823209	2BII	7.465
AX-89876755	2BII	7.465
AX-89822571	2BII	7.465
AX-89847613	2BII	7.465
AX-89822651	2BII	7.465
AX-89781882	2BII	8.383
AX-89847403	2BII	9.301
AX-89872348	2BII	9.606
AX-89783537	2BII	9.606
AX-89822840	2BII	9.606
AX-89783567	2BII	10.525
AX-89783575	2BII	11.451
AX-89822927	2BII	11.451
AX-89783591	2BII	11.451
AX-89822929	2BII	11.451
AX-89822918	2BII	11.451
AX-89822884	2BII	11.464
AX-89872359	2BII	12.674
AX-89904585	2BII	13.6
AX-89822505	2BII	13.6
AX-89847547	2C	0
AX-89847434	2C	0
AX-89872350	2C	0
AX-89911540	2C	0
AX-89783538	2C	0
AX-89879967	2C	0
AX-89821338	2C	1.227
AX-89820990	2C	1.227
AX-89782552	2C	1.227
AX-89904495	2C	1.227
AX-89782521	2C	1.227
AX-89820798	2C	2.454
AX-89820639	2C	2.454
AX-89782181	2C	2.454
AX-89821161	2C	2.454
AX-89821186	2C	2.454
AX-89821169	2C	2.454
AX-89782044	2C	2.454
AX-89820856	2C	2.454
AX-89821132	2C	2.454
AX-89878257	2C	2.454
AX-89782180	2C	2.454
AX-89781746	2C	3.064
AX-89781606	2C	3.064
AX-89781464	2C	4.916
AX-89782909	2C	4.916
AX-89823370	2C	4.916
AX-89821513	2C	4.916
AX-89782949	2C	4.916
AX-89823508	2C	4.916
AX-89823158	2C	7.401
AX-89823144	2C	7.401
AX-89860953	2C	7.401
AX-89823159	2C	7.401
AX-89823166	2C	7.401
AX-89783715	2C	8.011
AX-89823100	2C	8.011
AX-89803799	2C	8.011
AX-89783733	2C	8.011
AX-89823102	2C	8.011
AX-89823083	2C	8.011
AX-89823124	2C	8.011
AX-89823117	2C	8.011
AX-89823104	2C	8.011
AX-89783722	2C	8.011
AX-89823045	2C	8.62
AX-89851687	2C	8.62
AX-89806836	2C	9.23
AX-89904628	2C	9.23
AX-89823028	2C	9.23
AX-89783403	2C	9.84
AX-89822588	2C	9.84
AX-89822585	2C	9.84
AX-89822598	2C	9.84
AX-89847534	2C	10.45
AX-89822627	2C	10.45
AX-89904577	2C	11.677
AX-89815367	2C	12.285
AX-89822658	2C	12.285
AX-89783277	2C	12.285
AX-89822758	2C	12.285
AX-89783529	2C	12.285
AX-89806798	2C	12.285
AX-89822799	2C	12.285
AX-89783280	2C	12.285
AX-89783474	2C	12.285
AX-89811700	2C	12.285
AX-89822675	2C	12.285
AX-89783505	2C	12.285
AX-89822433	2C	12.285
AX-89783445	2C	12.895
AX-89823199	2C	15.356
AX-89783905	2C	15.356
AX-89783780	2C	15.356
AX-89823310	2C	15.356
AX-89783805	2C	15.356
AX-89823287	2C	15.356
AX-89823317	2C	15.356
AX-89823284	2C	15.356
AX-89783772	2C	15.356
AX-89783809	2C	15.356
AX-89783844	2C	15.356
AX-89783882	2C	15.356
AX-89783903	2C	15.356
AX-89803830	2C	15.356
AX-89819605	2CII	0.956
AX-89781223	2CII	2.043
AX-89819677	2CII	2.118
AX-89781244	2CII	2.457
AX-89819697	2CII	2.604
AX-89847252	2CII	2.706
AX-89781276	2CII	2.881
AX-89904370	2CII	2.904
AX-89819728	2CII	3.098
AX-89819729	2CII	3.101
AX-89819755	2CII	3.321
AX-89781300	2CII	3.432
AX-89847258	2CII	3.602
AX-89819777	2CII	3.613
AX-89820064	2CII	7.451
AX-89820059	2CII	7.469
AX-89820045	2CII	7.695
AX-89820137	2CII	8.385
AX-89904404	2CII	8.651
AX-89781645	2CII	8.715
AX-89877272	2CII	8.781
AX-89820172	2CII	8.82
AX-89781675	2CII	9.464
AX-89781680	2CII	9.502
AX-89820224	2CII	9.527
AX-89820226	2CII	9.669
AX-89820230	2CII	9.69
AX-89862853	2CII	9.695
AX-89820237	2CII	9.789
AX-89851380	2CII	9.989
AX-89781718	2CII	10.166
AX-89781726	2CII	10.238
AX-89781730	2CII	10.269
AX-89877408	2CII	10.336
AX-89781751	2CII	11.464
AX-89820301	2CII	11.465
AX-89820303	2CII	11.474
AX-89820307	2CII	11.496
AX-89820328	2CII	11.733
AX-89781786	2CII	11.856
AX-89781791	2CII	11.949
AX-89781794	2CII	12.041
AX-89781808	2CII	12.251
AX-89847316	2CII	12.333
AX-89781816	2CII	12.409
AX-89781817	2CII	12.421
AX-89781828	2CII	12.503
AX-89820379	2CII	12.516
AX-89781835	2CII	12.539
AX-89904428	2CII	12.586
AX-89820397	2CII	12.81
AX-89803527	2CII	13.073
AX-89811647	2CII	13.207
AX-89820432	2CII	13.218
AX-89806658	2CII	13.323
AX-89820467	2CII	13.617
AX-89803533	2CII	13.662
AX-89781934	2CII	13.845
AX-89781948	2CII	13.935
AX-89877629	2CII	13.982
AX-89781950	2CII	13.984
AX-89781957	2CII	14.057
AX-89820521	2CII	14.286
AX-89820526	2CII	14.293
AX-89820527	2CII	14.296
AX-89877684	2CII	14.381
AX-89820559	2CII	14.485
AX-89811652	2CII	14.533
AX-89847332	2CII	14.643
AX-89803553	2CII	14.695
AX-89820583	2CII	14.696
AX-89820585	2CII	14.733
AX-89782011	2CII	14.804
AX-89782032	2CII	14.888
AX-89782033	2CII	14.889
AX-89820638	2CII	14.952
AX-89782067	2CII	15.14
AX-89820690	2CII	15.674
AX-89783142	2CII	18.243
AX-89783212	2CII	18.39
AX-89822389	2CII	18.489
AX-89822391	2CII	18.496
AX-89820978	2CII	20.321
AX-89878087	2CII	20.617
AX-89782248	2CII	21.288
AX-89820883	2CII	21.409
AX-89820874	2CII	21.46
AX-89820871	2CII	21.499
AX-89782205	2CII	21.877
AX-89820822	2CII	21.889
AX-89820818	2CII	21.923
AX-89820781	2CII	22.181
AX-89782165	2CII	22.246
AX-89820752	2CII	22.355
AX-89782150	2CII	22.386
AX-89877878	2CII	22.429
AX-89820733	2CII	22.604
AX-89782106	2CII	22.772
AX-89782305	2CII	23.079
AX-89782823	2CII	23.307
AX-89782814	2CII	23.407
AX-89782811	2CII	23.434
AX-89821722	2CII	23.551
AX-89782803	2CII	23.645
AX-89782796	2CII	23.784
AX-89821706	2CII	23.813
AX-89782793	2CII	23.839
AX-89878848	2CII	23.89
AX-89806735	2CII	24.667
AX-89878761	2CII	24.841
AX-89821608	2CII	24.88
AX-89782713	2CII	24.898
AX-89867719	2CII	24.919
AX-89782699	2CII	24.983
AX-89782698	2CII	24.986
AX-89782697	2CII	24.99
AX-89872344	2CII	25.013
AX-89821589	2CII	25.054
AX-89904518	2CII	25.151
AX-89821569	2CII	25.192
AX-89821570	2CII	25.192
AX-89782680	2CII	25.236
AX-89821563	2CII	25.237
AX-89782678	2CII	25.241
AX-89878664	2CII	25.675
AX-89821517	2CII	25.682
AX-89878657	2CII	25.789
AX-89782645	2CII	25.802
AX-89821506	2CII	25.827
AX-89821488	2CII	25.923
AX-89847395	2CII	25.954
AX-89821441	2CII	26.217
AX-89782602	2CII	26.234
AX-89821434	2CII	26.266
AX-89867715	2CII	26.311
AX-89782577	2CII	26.504
AX-89860842	2CII	26.553
AX-89821399	2CII	26.563
AX-89878533	2CII	26.624
AX-89821388	2CII	26.632
AX-89782557	2CII	26.638
AX-89821384	2CII	26.64
AX-89782537	2CII	26.954
AX-89782534	2CII	26.982
AX-89847383	2CII	27.176
AX-89782492	2CII	27.555
AX-89821230	2CII	28.028
AX-89782455	2CII	28.078
AX-89878328	2CII	28.375
AX-89782416	2CII	28.636
AX-89878274	2CII	28.733
AX-89782408	2CII	28.739
AX-89821143	2CII	28.76
AX-89782387	2CII	29.035
AX-89821117	2CII	29.042
AX-89878229	2CII	29.213
AX-89821094	2CII	29.292
AX-89878221	2CII	29.294
AX-89821081	2CII	29.353
AX-89782362	2CII	29.469
AX-89815331	2CII	29.487
AX-89878147	2CII	29.955
AX-89821008	2CII	30.045
AX-89811689	2CII	30.568
AX-89811687	2CII	30.981
AX-89783007	2CII	31.064
AX-89821971	2CII	31.317
AX-89782956	2CII	31.569
AX-89782950	2CII	31.641
AX-89847435	2CII	31.949
AX-89782901	2CII	32.408
AX-89821860	2CII	32.444
AX-89821854	2CII	32.494
AX-89821837	2CII	32.617
AX-89821823	2CII	32.695
AX-89847430	2CII	32.76
AX-89821815	2CII	32.773
AX-89821805	2CII	32.848
AX-89869738	2CII	32.878
AX-89821785	2CII	32.959
AX-89821777	2CII	33.018
AX-89821763	2CII	33.131
AX-89878896	2CII	33.16
AX-89782832	2CII	33.17
AX-89878892	2CII	33.194
AX-89782828	2CII	33.212
AX-89783196	2D	0
AX-89879572	2D	0
AX-89783219	2D	0
AX-89820964	2D	1.22
AX-89822169	2D	1.22
AX-89867688	2D	1.22
AX-89820916	2D	1.829
AX-89782276	2D	1.829
AX-89860810	2D	1.829
AX-89820885	2D	1.829
AX-89820949	2D	1.829
AX-89820948	2D	1.829
AX-89782289	2D	1.829
AX-89860806	2D	1.829
AX-89820823	2D	2.439
AX-89820811	2D	2.439
AX-89847347	2D	2.439
AX-89872327	2D	2.439
AX-89782139	2D	2.439
AX-89820753	2D	2.439
AX-89820751	2D	2.439
AX-89821616	2D	3.049
AX-89821723	2D	3.049
AX-89820717	2D	3.049
AX-89821636	2D	3.049
AX-89821634	2D	3.049
AX-89878858	2D	3.049
AX-89847417	2D	3.049
AX-89782729	2D	3.049
AX-89782770	2D	3.049
AX-89847410	2D	3.049
AX-89847412	2D	3.049
AX-89847413	2D	3.049
AX-89782112	2D	3.049
AX-89782780	2D	3.049
AX-89904525	2D	3.049
AX-89782722	2D	3.049
AX-89782795	2D	3.049
AX-89782819	2D	3.049
AX-89782813	2D	3.049
AX-89821658	2D	3.049
AX-89803468	2D	18.14
AX-89819952	2D	18.14
AX-89787726	3A	0.61
AX-89824002	3A	0.61
AX-89847654	3A	0.61
AX-89787037	3A	0.61
AX-89826921	3A	0.61
AX-89881400	3A	0.61
AX-89784634	3A	0.61
AX-89863285	3A	0.61
AX-89884902	3A	0.61
AX-89787547	3A	0.61
AX-89807302	3A	0.908
AX-89786942	3A	1.218
AX-89786824	3A	1.218
AX-89786825	3A	1.218
AX-89786111	3A	2.437
AX-89904813	3A	4.266
AX-89825543	3A	4.266
AX-89824590	3A	6.728
AX-89784805	3A	7.955
AX-89787136	3A	9.792
AX-89827284	3A	10.402
AX-89861226	3A	11.012
AX-89827529	3A	11.621
AX-89827483	3A	12.841
AX-89787254	3A	14.061
AX-89787233	3A	14.061
AX-89827384	3A	14.061
AX-89787414	3A	15.89
AX-89827656	3A	15.89
AX-89787936	3A	17.727
AX-89828211	3A	17.727
AX-89807351	3A	17.727
AX-89828165	3A	18.336
AX-89905049	3A	18.336
AX-89828053	3A	18.946
AX-89787787	3A	18.946
AX-89848239	3A	18.946
AX-89848226	3A	20.783
AX-89787670	3A	20.783
AX-89787602	3A	20.783
AX-89884973	3A	22.01
AX-89827832	3A	23.237
AX-89825814	3A	25.074
AX-89848012	3AII	0
AX-89848117	3AII	0
AX-89848111	3AII	0
AX-89826413	3AII	0
AX-89883564	3AII	0
AX-89863385	3AII	0
AX-89786710	3AII	1.563
AX-89883462	3AII	3.126
AX-89884059	3AII	3.126
AX-89883524	3AII	4.994
AX-89826587	3AII	5.624
AX-89826562	3AII	6.521
AX-89807188	3AII	6.521
AX-89883638	3AII	7.134
AX-89824945	3AII	8.366
AX-89785259	3AII	8.978
AX-89824994	3AII	8.978
AX-89825077	3AII	10.21
AX-89825340	3AII	12.047
AX-89882368	3AII	13.274
AX-89785519	3AII	13.427
AX-89825260	3AII	13.579
AX-89825479	3AII	14.189
AX-89784448	3B	1.852
AX-89824061	3B	1.852
AX-89824078	3B	1.852
AX-89847715	3B	2.462
AX-89824186	3B	3.072
AX-89784581	3B	3.072
AX-89824193	3B	3.072
AX-89824230	3B	3.681
AX-89824265	3B	4.291
AX-89824339	3B	5.518
AX-89847902	3B	21.206
AX-89825345	3B	24.911
AX-89785255	3B	26.763
AX-89825022	3B	26.763
AX-89825024	3B	26.763
AX-89882185	3B	26.763
AX-89785281	3B	26.763
AX-89824913	3B	27.524
AX-89826478	3B	27.981
AX-89786678	3B	31.678
AX-89786628	3B	31.678
AX-89826334	3B	33.516
AX-89884128	3B	34.125
AX-89786634	3B	34.125
AX-89826657	3B	34.125
AX-89811768	3B	35.051
AX-89809643	3B	36.407
AX-89785701	3B	39.027
AX-89825060	3B	39.027
AX-89785686	3B	39.635
AX-89825241	3B	40.092
AX-89825376	3B	40.245
AX-89825358	3B	40.245
AX-89785566	3B	41.487
AX-89826194	3B	46.548
AX-89904764	3B	48.232
AX-89824808	3B	48.232
AX-89881877	3B	48.232
AX-89784910	3B	48.232
AX-89881716	3B	48.232
AX-89824766	3B	48.232
AX-89847796	3B	48.232
AX-89803968	3B	48.232
AX-89826278	3B	48.232
AX-89784924	3B	48.232
AX-89904769	3B	51.392
AX-89827018	3B	52.612
AX-89824636	3B	52.917
AX-89826033	3B	54.3
AX-89786956	3B	54.758
AX-89785036	3B	55.373
AX-89904780	3B	60.015
AX-89784974	3B	60.32
AX-89786140	3B	61.848
AX-89786152	3B	61.848
AX-89784604	3C	0.305
AX-89824257	3C	0.915
AX-89824308	3C	3.384
AX-89784689	3C	3.994
AX-89904738	3C	4.912
AX-89824473	3C	5.216
AX-89824634	3C	9.944
AX-89785000	3C	9.944
AX-89786155	3C	11.506
AX-89785636	3C	22.889
AX-89847885	3C	23.485
AX-89785650	3C	24.082
AX-89825059	3C	27.086
AX-89825058	3C	27.086
AX-89785327	3C	27.683
AX-89785296	3C	28.279
AX-89824958	3C	28.279
AX-89847840	3C	28.279
AX-89847823	3C	29.479
AX-89785194	3C	29.479
AX-89786447	3C	30.672
AX-89904967	3C	35.605
AX-89861158	3C	35.605
AX-89786796	3C	35.605
AX-89786777	3C	35.605
AX-89786429	3C	35.605
AX-89826985	3C	35.912
AX-89883941	3C	36.219
AX-89786760	3C	36.219
AX-89826983	3C	36.523
AX-89861161	3C	36.828
AX-89826909	3C	36.828
AX-89826434	3C	36.828
AX-89786793	3C	36.828
AX-89872468	3CII	3.299
AX-89784116	3CII	3.764
AX-89828401	3CII	3.764
AX-89823893	3CII	4.069
AX-89784395	3CII	4.069
AX-89784509	3CII	4.374
AX-89827786	3CII	4.984
AX-89827155	3CII	5.899
AX-89827488	3CII	6.203
AX-89827249	3CII	6.203
AX-89788019	3CII	8.343
AX-89823851	3CII	8.343
AX-89784627	3CII	8.648
AX-89784660	3CII	8.648
AX-89784630	3CII	8.648
AX-89824251	3CII	8.648
AX-89880723	3CII	8.952
AX-89826249	3CII	13.259
AX-89851954	3CII	13.564
AX-89882969	3CII	13.564
AX-89825975	3CII	13.717
AX-89882614	3CII	13.868
AX-89867918	3CII	14.477
AX-89785383	3CII	14.782
AX-89824596	3CII	17.925
AX-89827308	3CII	18.535
AX-89807273	3CII	18.679
AX-89784782	3CII	19.143
AX-89787152	3CII	21.822
AX-89848169	3CII	23.786
AX-89827611	3CII	27.272
AX-89787443	3CII	29.009
AX-89787447	3CII	29.009
AX-89868066	3CII	29.314
AX-89787453	3CII	29.314
AX-89787896	3CII	29.619
AX-89828275	3CII	29.619
AX-89828280	3CII	29.619
AX-89905055	3CII	31.147
AX-89787489	3CII	31.452
AX-89828140	3CII	32.062
AX-89828144	3CII	32.062
AX-89828095	3CII	32.98
AX-89787780	3CII	32.98
AX-89828056	3CII	33.594
AX-89787765	3CII	33.594
AX-89787658	3CII	33.594
AX-89827932	3CII	34.204
AX-89827953	3CII	34.813
AX-89827916	3CII	34.813
AX-89787529	3CII	35.118
AX-89827975	3CII	35.118
AX-89787531	3CII	35.118
AX-89885068	3CII	35.118
AX-89787752	3CII	35.423
AX-89848214	3CII	35.423
AX-89787728	3CII	36.959
AX-89828039	3CII	36.959
AX-89827992	3CII	37.264
AX-89825946	3CII	41.912
AX-89785914	3CII	44.98
AX-89785926	3CII	44.98
AX-89825628	3CII	47.141
AX-89785782	3CII	48.056
AX-89828391	3CII	51.372
AX-89825550	3CII	52.077
AX-89785851	3CII	52.753
AX-89786092	3CII	57.646
AX-89787250	3D	0
AX-89905008	3D	0.304
AX-89787309	3D	0.609
AX-89827500	3D	0.609
AX-89787175	3D	4.075
AX-89904999	3D	5.761
AX-89825801	3D	10.049
AX-89787009	3D	11.493
AX-89787027	3D	11.493
AX-89827140	3D	11.493
AX-89824659	3D	13.276
AX-89787586	3D	30.777
AX-89825812	3D	36.895
AX-89883076	3D	41.753
AX-89825902	3D	41.753
AX-89785929	3D	47.834
AX-89825732	3D	47.834
AX-89825742	3D	47.834
AX-89788027	3D	48.752
AX-89828367	3D	48.752
AX-89787981	3D	50.969
AX-89872429	3D	50.969
AX-89785832	3D	51.378
AX-89861012	3D	52.191
AX-89825710	3D	52.191
AX-89785898	3D	52.191
AX-89803886	3D	52.191
AX-89784234	3D	52.191
AX-89823820	3D	52.801
AX-89824644	3D	65.276
AX-89815389	3D	65.718
AX-89882543	3D	72.849
AX-89825407	3D	72.849
AX-89882581	3D	72.849
AX-89826495	3D	74.192
AX-89785272	3D	74.192
AX-89807205	3D	75.976
AX-89786619	3D	75.976
AX-89826690	3D	76.418
AX-89786745	3D	78.219
AX-89786903	3D	79.108
AX-89826950	3D	79.108
AX-89882097	3D	84.024
AX-89824940	3D	84.024
AX-89786549	3D	84.024
AX-89785275	3D	84.024
AX-89785227	3D	84.024
AX-89824939	3D	84.024
AX-89815431	3D	84.024
AX-89787490	3D	85.378
AX-89787960	3D	87.356
AX-89787909	3D	87.356
AX-89786896	3D	88.98
AX-89905046	3D	89.335
AX-89787762	3D	89.335
AX-89807224	3D	89.422
AX-89826911	3D	89.422
AX-89787741	3D	90.318
AX-89827908	3D	91.301
AX-89827905	3D	91.301
AX-89787549	3D	92.284
AX-89848036	3D	94.878
AX-89785313	3D	95.32
AX-89807043	3D	95.762
AX-89785599	3D	96.645
AX-89785510	3D	98.43
AX-89825505	3D	98.872
AX-89785735	3D	98.872
AX-89826076	3D	99.761
AX-89824791	3D	102.898
AX-89827047	3D	106.642
AX-89807106	3D	117.289
AX-89848276	3D	117.442
AX-89785840	3D	117.594
AX-89784343	3D	118.812
AX-89823931	3D	118.812
AX-89784339	3D	118.812
AX-89784593	3D	128.444
AX-89824337	3D	129.055
AX-89807238	3D	130.309
AX-89881277	3D	130.309
AX-89861066	3D	130.913
AX-89785024	3D	130.913
AX-89827078	3D	130.917
AX-89905067	3D	131.525
AX-89827099	3D	131.525
AX-89827084	3D	131.525
AX-89827072	3D	131.677
AX-89824514	3D	132.286
AX-89786135	3D	133.67
AX-89788017	3D	133.67
AX-89872445	3D	133.67
AX-89872446	3D	133.67
AX-89784881	3D	135.087
AX-89803981	3D	135.502
AX-89883391	3D	135.502
AX-89883394	3D	135.806
AX-89786338	3D	135.806
AX-89863314	3D	135.806
AX-89883342	3D	136.42
AX-89826212	3D	136.42
AX-89786324	3D	136.42
AX-89905236	4A	0
AX-89788355	4A	4.786
AX-89788818	4A	7.17
AX-89788388	4A	7.17
AX-89804654	4A	7.475
AX-89789438	4A	7.475
AX-89789494	4A	7.475
AX-89789052	4A	7.475
AX-89828572	4A	7.78
AX-89905083	4A	7.78
AX-89788211	4A	7.78
AX-89788193	4A	7.78
AX-89789303	4A	7.78
AX-89832030	4A	8.091
AX-89791072	4A	8.411
AX-89831436	4A	9.915
AX-89807632	4A	9.915
AX-89831601	4A	9.915
AX-89791000	4A	9.915
AX-89831454	4A	9.915
AX-89788201	4A	11.048
AX-89791547	4A	11.048
AX-89830516	4A	11.75
AX-89830849	4A	12.055
AX-89830665	4A	12.055
AX-89872570	4A	12.055
AX-89790345	4A	12.055
AX-89790285	4A	12.055
AX-89830847	4A	12.157
AX-89905085	4A	13.589
AX-89790878	4A	13.894
AX-89790872	4A	13.894
AX-89790968	4A	14.046
AX-89790960	4A	14.046
AX-89790905	4A	14.199
AX-89790930	4A	14.199
AX-89831513	4A	14.199
AX-89888652	4A	14.199
AX-89888665	4A	17.072
AX-89848480	4AII	0
AX-89872562	4AII	0
AX-89830179	4AII	0
AX-89830616	4AII	0.61
AX-89788447	4AII	4.385
AX-89888020	4AII	4.995
AX-89830794	4AII	4.995
AX-89790331	4AII	5.605
AX-89790316	4AII	5.605
AX-89790304	4AII	5.605
AX-89888108	4AII	6.213
AX-89830930	4AII	6.213
AX-89830903	4AII	6.213
AX-89788208	4B	0
AX-89888835	4B	1.249
AX-89829554	4B	1.859
AX-89829328	4B	1.859
AX-89886077	4B	1.859
AX-89886125	4B	2.011
AX-89886916	4B	2.163
AX-89863574	4B	2.316
AX-89788357	4B	2.468
AX-89848309	4B	2.468
AX-89905182	4B	2.468
AX-89829755	4B	2.621
AX-89848711	4B	2.773
AX-89905379	4B	3.078
AX-89791341	4B	3.078
AX-89791461	4B	3.078
AX-89790363	4B	4.305
AX-89848575	4B	4.305
AX-89831423	4B	4.305
AX-89887865	4B	4.61
AX-89905267	4B	4.61
AX-89848537	4B	4.777
AX-89867198	4B	5.051
AX-89831443	4B	5.051
AX-89790984	4B	5.66
AX-89863735	4B	5.66
AX-89791533	4B	5.66
AX-89789175	4B	5.66
AX-89857344	4B	5.66
AX-89888660	4B	5.66
AX-89791550	4B	5.66
AX-89831463	4B	5.66
AX-89905333	4B	5.66
AX-89863745	4B	5.66
AX-89791490	4B	5.66
AX-89848694	4B	5.986
AX-89790946	4B	6.268
AX-89790948	4B	6.268
AX-89848759	4B	6.268
AX-89848547	4B	11.78
AX-89831754	4B	15.516
AX-89888922	4B	15.516
AX-89791153	4B	16.125
AX-89791163	4B	16.125
AX-89831712	4B	16.125
AX-89791140	4B	16.125
AX-89831707	4B	17.978
AX-89791127	4B	17.978
AX-89791125	4B	18.587
AX-89863751	4B	19.197
AX-89831669	4B	19.197
AX-89831677	4B	19.197
AX-89863754	4B	19.197
AX-89888846	4B	19.197
AX-89791068	4B	19.807
AX-89804657	4B	20.417
AX-89791063	4B	20.417
AX-89791062	4B	20.417
AX-89832069	4B	21.644
AX-89832019	4B	21.644
AX-89848737	4B	22.253
AX-89905364	4B	22.253
AX-89905375	4B	22.253
AX-89789222	4B	23.457
AX-89789187	4B	23.457
AX-89829675	4B	23.457
AX-89829599	4B	23.457
AX-89829705	4B	23.457
AX-89829712	4B	23.457
AX-89789281	4B	23.457
AX-89828601	4B	23.457
AX-89829704	4B	23.457
AX-89789115	4B	23.457
AX-89829636	4B	23.457
AX-89789151	4B	23.457
AX-89791345	4B	23.48
AX-89831424	4B	23.48
AX-89831916	4B	23.48
AX-89829403	4B	25.309
AX-89788889	4B	25.309
AX-89829455	4B	25.309
AX-89804414	4B	25.309
AX-89811273	4B	25.309
AX-89828613	4B	25.333
AX-89788225	4B	25.333
AX-89788232	4B	25.333
AX-89789315	4B	25.919
AX-89829802	4B	25.919
AX-89789335	4B	25.919
AX-89848434	4B	25.919
AX-89789337	4B	25.919
AX-89788283	4B	25.942
AX-89885786	4B	25.942
AX-89829819	4B	26.529
AX-89829844	4B	26.529
AX-89789387	4B	26.529
AX-89868188	4B	26.529
AX-89829838	4B	26.529
AX-89829886	4B	27.138
AX-89831942	4B	27.169
AX-89791389	4B	27.169
AX-89868196	4B	27.748
AX-89789511	4B	27.748
AX-89905202	4B	28.358
AX-89789529	4B	28.358
AX-89830012	4B	28.968
AX-89789555	4B	28.968
AX-89857094	4B	28.968
AX-89905208	4B	30.195
AX-89789751	4B	41.106
AX-89830239	4B	41.145
AX-89830204	4B	41.431
AX-89830187	4B	41.513
AX-89804506	4B	41.566
AX-89830153	4B	41.796
AX-89830152	4B	41.798
AX-89848487	4B	41.802
AX-89830143	4B	41.855
AX-89830130	4B	41.895
AX-89830771	4B	48.342
AX-89790211	4B	48.619
AX-89790274	4B	49.174
AX-89830842	4B	49.253
AX-89830851	4B	49.317
AX-89830877	4B	49.631
AX-89807581	4B	49.652
AX-89807582	4B	49.683
AX-89830890	4B	49.81
AX-89790348	4B	49.823
AX-89807584	4B	49.983
AX-89790369	4B	50.03
AX-89790375	4B	50.057
AX-89807589	4B	50.152
AX-89830918	4B	50.297
AX-89790405	4B	50.494
AX-89830942	4B	50.508
AX-89830947	4B	50.556
AX-89888130	4B	50.835
AX-89790420	4B	51.025
AX-89830976	4B	51.142
AX-89790443	4B	51.145
AX-89807595	4B	51.174
AX-89790455	4B	51.263
AX-89848587	4B	51.314
AX-89848594	4B	51.978
AX-89863700	4B	52.177
AX-89831073	4B	52.386
AX-89790518	4B	52.39
AX-89831080	4B	52.437
AX-89790523	4B	52.479
AX-89790529	4B	52.532
AX-89790543	4B	52.649
AX-89831114	4B	52.8
AX-89790560	4B	52.979
AX-89790569	4B	53.041
AX-89888325	4B	53.186
AX-89790590	4B	53.23
AX-89804607	4B	53.408
AX-89790699	4B	60.552
AX-89831335	4B	61.183
AX-89831343	4B	61.28
AX-89848365	4B	62.32
AX-89807425	4B	62.779
AX-89788770	4B	62.966
AX-89848357	4B	63.209
AX-89905130	4B	63.239
AX-89788691	4B	63.638
AX-89829093	4B	63.73
AX-89788634	4B	63.992
AX-89886191	4B	64.047
AX-89829010	4B	64.254
AX-89788604	4B	64.283
AX-89788600	4B	64.334
AX-89790830	4C	0
AX-89810097	4C	0.043
AX-89829948	4C	0.613
AX-89789489	4C	0.613
AX-89791489	4C	0.613
AX-89789492	4C	0.613
AX-89791083	4C	0.613
AX-89829990	4C	0.613
AX-89829924	4C	0.613
AX-89829192	4C	0.613
AX-89789493	4C	0.613
AX-89885942	4C	0.613
AX-89790024	4C	1.527
AX-89828553	4C	1.527
AX-89789967	4C	1.527
AX-89789938	4C	1.527
AX-89831581	4C	2.446
AX-89831438	4C	3.055
AX-89790866	4C	3.36
AX-89831449	4C	3.36
AX-89831453	4C	3.36
AX-89831498	4C	3.974
AX-89831469	4C	3.974
AX-89790881	4C	3.974
AX-89790952	4C	4.587
AX-89831505	4C	4.587
AX-89832126	4C	4.587
AX-89790981	4C	4.587
AX-89831507	4C	4.587
AX-89790184	4C	4.587
AX-89790988	4C	4.587
AX-89861545	4C	4.587
AX-89807637	4C	4.587
AX-89831504	4C	4.587
AX-89905360	4C	11.184
AX-89791186	4C	11.184
AX-89831663	4C	12.406
AX-89831664	4C	12.406
AX-89831657	4C	12.406
AX-89828540	4C	13.016
AX-89788160	4C	13.016
AX-89788172	4C	13.935
AX-89828555	4C	14.239
AX-89848707	4C	14.853
AX-89831967	4C	15.779
AX-89852265	4C	16.084
AX-89789234	4C	16.506
AX-89829582	4C	17.788
AX-89788914	4C	22.742
AX-89788904	4C	22.742
AX-89829367	4C	23.047
AX-89788952	4C	23.66
AX-89886523	4C	23.813
AX-89788974	4C	23.965
AX-89829438	4C	24.27
AX-89848395	4C	24.27
AX-89829757	4C	24.88
AX-89829483	4C	24.88
AX-89789306	4C	24.88
AX-89872554	4C	25.798
AX-89804466	4C	25.798
AX-89829823	4C	25.798
AX-89789467	4C	25.798
AX-89829859	4C	26.103
AX-89829864	4C	26.103
AX-89868191	4C	26.103
AX-89789486	4C	27.029
AX-89789473	4C	27.029
AX-89829953	4C	27.642
AX-89829974	4C	28.256
AX-89830024	4C	28.561
AX-89830013	4C	28.561
AX-89789559	4C	28.561
AX-89789581	4C	29.145
AX-89830078	4C	30.498
AX-89830572	4C	30.498
AX-89789628	4C	30.498
AX-89861433	4C	31.136
AX-89830536	4C	31.136
AX-89789996	4C	31.136
AX-89887670	4C	31.774
AX-89830459	4C	32.412
AX-89830473	4C	32.412
AX-89830238	4C	33.05
AX-89830296	4C	33.05
AX-89789747	4C	33.05
AX-89830309	4C	33.05
AX-89861418	4C	33.05
AX-89830341	4C	33.05
AX-89807517	4C	33.688
AX-89848548	4C	41.005
AX-89905257	4C	41.643
AX-89790216	4C	42.281
AX-89830818	4C	42.919
AX-89887988	4C	42.919
AX-89830845	4C	45.494
AX-89790336	4C	46.778
AX-89830886	4C	46.778
AX-89861463	4C	48.061
AX-89804592	4C	48.061
AX-89788696	4C	48.061
AX-89790485	4C	49.345
AX-89831040	4C	49.983
AX-89888202	4C	49.983
AX-89831293	4C	72.306
AX-89886417	4C	72.306
AX-89886319	4C	72.306
AX-89831304	4C	72.306
AX-89788753	4C	72.306
AX-89861498	4C	72.306
AX-89790682	4C	72.306
AX-89831274	4C	72.306
AX-89790715	4C	72.306
AX-89831307	4C	72.611
AX-89888498	4C	72.916
AX-89831356	4C	73.221
AX-89829216	4C	73.834
AX-89788632	4C	74.139
AX-89886173	4C	74.139
AX-89829156	4C	74.139
AX-89788717	4C	74.139
AX-89829068	4C	74.139
AX-89832108	4D	0
AX-89831610	4D	1.236
AX-89887852	4D	1.236
AX-89788760	4D	1.236
AX-89829470	4D	1.236
AX-89829476	4D	1.236
AX-89831474	4D	1.236
AX-89908495	4D	1.236
AX-89829121	4D	1.236
AX-89863790	4D	1.236
AX-89832145	4D	1.236
AX-89791078	4D	1.236
AX-89857345	4D	1.236
AX-89829113	4D	1.236
AX-89791029	4D	1.758
AX-89791398	4D	10.071
AX-89791104	4D	12.57
AX-89848712	4D	13.183
AX-89828542	4D	13.488
AX-89828538	4D	13.488
AX-89831700	4D	13.488
AX-89828549	4D	13.488
AX-89788163	4D	13.488
AX-89872589	4D	14.414
AX-89831805	4D	14.414
AX-89791191	4D	14.414
AX-89831719	4D	14.414
AX-89791161	4D	14.414
AX-89831800	4D	14.414
AX-89791334	4D	14.414
AX-89791384	4D	14.414
AX-89788337	4D	14.719
AX-89828638	4D	14.719
AX-89885764	4D	14.719
AX-89828725	4D	14.719
AX-89791160	4D	14.719
AX-89831925	4D	14.719
AX-89788261	4D	14.719
AX-89831918	4D	14.719
AX-89829672	4D	15.637
AX-89828599	4D	15.637
AX-89829691	4D	15.637
AX-89788214	4D	15.637
AX-89829688	4D	15.637
AX-89807470	4D	15.942
AX-89886778	4D	15.942
AX-89905173	4D	15.942
AX-89829615	4D	15.942
AX-89829595	4D	15.942
AX-89863592	4D	16.247
AX-89789128	4D	17.019
AX-89789134	4D	17.165
AX-89789255	4D	17.471
AX-89829536	4D	17.778
AX-89886710	4D	17.778
AX-89789097	4D	17.778
AX-89788223	4D	17.778
AX-89789066	4D	18.083
AX-89829503	4D	18.388
AX-89829743	4D	18.693
AX-89829286	4D	18.998
AX-89788393	4D	19.608
AX-89828816	4D	19.608
AX-89829345	4D	21.776
AX-89788877	4D	21.776
AX-89829374	4D	22.08
AX-89788963	4D	22.385
AX-89852346	4D	22.69
AX-89848399	4D	23.303
AX-89789032	4D	23.303
AX-89789349	4D	24.527
AX-89829785	4D	24.527
AX-89829793	4D	24.527
AX-89789435	4D	26.668
AX-89804474	4D	26.668
AX-89789413	4D	26.668
AX-89789498	4D	26.972
AX-89789981	4D	29.066
AX-89829969	4D	29.066
AX-89789742	4D	33.28
AX-89830221	4D	33.28
AX-89905216	4D	33.28
AX-89789782	4D	33.28
AX-89830229	4D	33.28
AX-89789749	4D	33.28
AX-89830188	4D	33.28
AX-89789797	4D	33.28
AX-89789790	4D	33.28
AX-89830427	4D	33.686
AX-89830343	4D	33.686
AX-89830410	4D	33.686
AX-89830308	4D	33.686
AX-89789673	4D	34.504
AX-89887325	4D	34.504
AX-89789639	4D	35.729
AX-89790197	4D	41.88
AX-89790235	4D	42.185
AX-89848557	4D	42.185
AX-89790233	4D	42.185
AX-89830817	4D	42.185
AX-89790205	4D	42.185
AX-89830822	4D	42.185
AX-89848558	4D	42.185
AX-89888043	4D	42.185
AX-89790360	4D	44.645
AX-89905273	4D	44.987
AX-89790395	4D	44.987
AX-89790398	4D	44.987
AX-89830936	4D	45.597
AX-89831015	4D	46.207
AX-89913145	4D	46.207
AX-89790495	4D	46.82
AX-89905291	4D	47.125
AX-89848603	4D	47.125
AX-89790497	4D	47.278
AX-89831060	4D	47.43
AX-89848593	4D	47.43
AX-89790550	4D	48.04
AX-89848605	4D	48.04
AX-89790562	4D	48.653
AX-89790567	4D	48.653
AX-89831134	4D	48.653
AX-89831012	4D	48.653
AX-89848914	5A	0
AX-89848927	5A	0.61
AX-89792444	5A	1.528
AX-89905795	5A	1.681
AX-89848811	5A	1.681
AX-89905413	5A	2.14
AX-89833293	5A	4.034
AX-89833277	5A	4.816
AX-89833166	5A	5.204
AX-89833254	5A	5.204
AX-89833164	5A	5.509
AX-89807784	5A	5.509
AX-89792270	5A	7.987
AX-89892599	5A	7.987
AX-89832846	5A	9.144
AX-89792521	5A	9.144
AX-89905534	5A	9.234
AX-89848804	5A	9.234
AX-89905431	5A	9.234
AX-89905422	5A	9.234
AX-89832504	5A	9.234
AX-89848806	5A	9.234
AX-89890645	5A	9.234
AX-89905424	5A	9.234
AX-89833519	5A	10.301
AX-89861638	5A	12.63
AX-89890753	5A	12.63
AX-89792507	5A	12.63
AX-89833626	5A	23.859
AX-89849112	5A	24.541
AX-89834029	5A	24.541
AX-89908687	5A	24.541
AX-89834233	5A	25.223
AX-89833071	5A	25.906
AX-89833065	5A	25.906
AX-89833473	5A	27.271
AX-89833456	5A	27.271
AX-89792465	5A	27.271
AX-89834316	5A	27.953
AX-89861722	5A	27.953
AX-89891533	5A	27.953
AX-89807877	5A	27.953
AX-89861696	5A	27.953
AX-89849247	5A	41.175
AX-89834846	5A	41.175
AX-89793514	5A	41.175
AX-89793446	5A	42.031
AX-89793486	5A	43.25
AX-89834736	5A	44.169
AX-89849208	5A	45.4
AX-89849202	5A	45.704
AX-89849206	5A	46.623
AX-89849203	5A	46.623
AX-89849307	5A	47.233
AX-89835259	5A	47.233
AX-89835186	5A	48.151
AX-89832933	5A	48.456
AX-89849287	5A	48.456
AX-89793822	5A	48.456
AX-89793759	5A	48.456
AX-89792120	5A	49.066
AX-89807905	5A	49.984
AX-89807909	5A	50.289
AX-89849273	5A	50.289
AX-89791628	5B	0
AX-89832478	5B	0
AX-89793192	5B	4.986
AX-89834146	5B	4.986
AX-89834854	5B	5.04
AX-89793394	5B	5.192
AX-89793540	5B	5.291
AX-89835398	5B	5.615
AX-89835533	5B	7.127
AX-89793998	5B	7.127
AX-89793975	5B	7.127
AX-89794257	5B	12.903
AX-89807964	5B	13.512
AX-89849091	5BII	0.61
AX-89793526	5BII	0.61
AX-89834799	5BII	2.157
AX-89891714	5BII	3.076
AX-89834505	5BII	4.318
AX-89833554	5BII	7.081
AX-89792508	5BII	7.081
AX-89792550	5BII	7.999
AX-89891196	5BII	7.999
AX-89792504	5BII	7.999
AX-89792755	5BII	9.851
AX-89792738	5BII	9.851
AX-89807839	5BII	9.851
AX-89833792	5BII	10.77
AX-89849010	5BII	11.227
AX-89834078	5BII	11.683
AX-89849121	5BII	11.683
AX-89834010	5BII	11.683
AX-89792957	5BII	11.683
AX-89804924	5BII	11.683
AX-89833078	5BII	11.683
AX-89792936	5BII	11.683
AX-89792794	5BII	11.683
AX-89792859	5BII	11.683
AX-89804895	5BII	11.683
AX-89833811	5BII	11.683
AX-89905496	5BII	12.911
AX-89834355	5BII	13.52
AX-89849193	5BII	15.372
AX-89834608	5BII	15.372
AX-89834461	5BII	16.599
AX-89834460	5BII	16.599
AX-89834459	5BII	16.599
AX-89849175	5BII	16.599
AX-89804957	5BII	17.209
AX-89849158	5BII	17.819
AX-89834850	5C	0
AX-89833453	5C	12.916
AX-89890300	5C	13.734
AX-89793360	5C	14.292
AX-89905539	5C	14.749
AX-89834021	5C	16.594
AX-89834022	5C	17.207
AX-89792578	5C	17.207
AX-89792739	5C	18.426
AX-89833899	5C	19.039
AX-89792798	5C	19.039
AX-89833951	5C	19.344
AX-89863906	5C	19.344
AX-89833864	5C	19.344
AX-89832802	5C	21.306
AX-89892597	5C	21.306
AX-89793899	5C	21.306
AX-89792017	5C	38.519
AX-89836419	5C	45.164
AX-89836379	5C	45.164
AX-89905410	5C	46.121
AX-89905864	5C	46.121
AX-89805109	5C	46.121
AX-89836577	5C	50.475
AX-89794410	5C	54.16
AX-89794088	5C	54.16
AX-89835644	5C	54.16
AX-89835885	5C	54.16
AX-89835629	5C	54.312
AX-89893114	5C	55.379
AX-89835732	5C	56.147
AX-89835851	5C	56.915
AX-89892773	5C	59.796
AX-89793908	5C	61.957
AX-89905702	5C	62.13
AX-89792799	5C	65.028
AX-89872655	5C	66.259
AX-89792050	5C	68.101
AX-89905884	5C	68.101
AX-89794018	5C	69.104
AX-89793996	5C	69.104
AX-89793873	5C	69.943
AX-89835821	5C	75.768
AX-89794199	5C	77.636
AX-89835882	5C	77.941
AX-89836108	5C	78.278
AX-89858245	5C	78.766
AX-89836025	5C	78.766
AX-89794470	5C	78.766
AX-89810327	5C	80.094
AX-89794507	5C	80.096
AX-89836652	5C	81.014
AX-89794726	5C	83.178
AX-89848788	5C	89.029
AX-89832240	5C	89.947
AX-89791640	5C	89.947
AX-89836975	5C	90.354
AX-89795064	5C	92.092
AX-89836804	5C	93.01
AX-89804863	5C	110.509
AX-89833995	5C	111.076
AX-89833768	5C	112.3
AX-89833731	5C	112.605
AX-89905647	5C	113.523
AX-89793002	5C	113.523
AX-89833733	5C	113.523
AX-89792665	5C	113.523
AX-89833465	5C	115.632
AX-89793263	5C	117.741
AX-89793208	5C	118.441
AX-89834766	5C	126.558
AX-89793374	5C	127.258
AX-89835261	5C	128.481
AX-89793367	5C	128.58
AX-89835311	5C	128.798
AX-89793365	5C	128.918
AX-89793745	5C	129.382
AX-89792117	5C	129.419
AX-89835119	5C	129.845
AX-89793667	5C	129.845
AX-89835115	5C	130.309
AX-89804797	5C	130.309
AX-89792125	5C	130.309
AX-89835310	5C	131.845
AX-89834636	5C	131.845
AX-89793418	5C	132.455
AX-89834718	5C	132.455
AX-89834734	5C	132.455
AX-89834668	5C	133.659
AX-89893519	5D	2.533
AX-89791881	5D	2.533
AX-89792389	5D	4.397
AX-89890773	5D	6.261
AX-89848967	5D	6.261
AX-89833929	5D	8.12
AX-89861796	5D	11.848
AX-89793543	5D	12.114
AX-89793919	5D	12.114
AX-89835512	5D	12.114
AX-89835760	5D	12.495
AX-89835722	5D	13.642
AX-89835915	5D	14.867
AX-89893354	5D	18.09
AX-89893907	5D	19.782
AX-89794529	5D	19.934
AX-89836591	5D	20.554
AX-89836588	5D	21.621
AX-89836375	5D	22.539
AX-89893565	5D	22.539
AX-89794619	5D	22.843
AX-89836478	5D	22.843
AX-89794614	5D	24.067
AX-89836263	5D	24.371
AX-89836245	5D	24.985
AX-89794631	5D	25.137
AX-89791729	5D	25.29
AX-89791554	5D	27.498
AX-89795155	5D	27.498
AX-89791705	5D	29.17
AX-89794578	5D	30.277
AX-89794736	5D	34.192
AX-89794834	5D	35.292
AX-89836166	5D	36.4
AX-89893223	5D	40.401
AX-89849390	5D	40.401
AX-89835635	5D	42.073
AX-89836009	5D	44.831
AX-89848826	5D	48.011
AX-89791906	5D	48.011
AX-89848825	5D	48.011
AX-89836546	5D	49.874
AX-89866329	5D	51.546
AX-89795008	5D	55.723
AX-89836959	5D	59.228
AX-89832166	5D	59.228
AX-89836919	5D	59.228
AX-89836965	5D	59.228
AX-89836801	5D	61.988
AX-89836704	5D	64.047
AX-89791931	5D	66.106
AX-89905432	5D	66.789
AX-89791803	5D	67.473
AX-89835341	5D	67.473
AX-89832459	5D	67.473
AX-89892546	5D	67.473
AX-89866248	5D	70.233
AX-89848925	5D	70.233
AX-89792306	5D	70.233
AX-89848928	5D	70.233
AX-89872626	5D	72.975
AX-89792074	5D	72.975
AX-89891081	5D	73.659
AX-89833815	5D	73.659
AX-89792720	5D	73.662
AX-89833788	5D	73.662
AX-89792971	5D	85.278
AX-89792645	5D	85.818
AX-89849007	5D	86.358
AX-89834541	5D	87.502
AX-89834038	5D	87.983
AX-89891629	5D	88.202
AX-89891243	5D	88.522
AX-89793218	5D	88.902
AX-89834506	5D	88.902
AX-89890292	5D	89.602
AX-89792214	5D	89.602
AX-89834532	5D	90.517
AX-89793288	5D	91.433
AX-89834495	5D	91.74
AX-89834625	5D	91.74
AX-89834767	5D	98.122
AX-89892056	5D	98.339
AX-89905736	5D	98.426
AX-89835308	5D	101.181
AX-89811948	5D	101.181
AX-89872652	5D	101.485
AX-89793663	5D	101.79
AX-89849280	5D	101.79
AX-89836058	5D	101.79
AX-89793683	5D	101.79
AX-89835039	5D	101.79
AX-89842323	6A	0
AX-89799182	6A	0.305
AX-89849905	6A	0.305
AX-89899386	6A	0.61
AX-89906560	6A	1.528
AX-89842590	6A	1.528
AX-89900059	6A	1.528
AX-89842603	6A	1.528
AX-89837008	6A	1.833
AX-89837470	6A	2.138
AX-89837451	6A	2.443
AX-89850072	6A	5.404
AX-89849900	6A	8.978
AX-89849866	6A	9.591
AX-89849839	6A	10.811
AX-89796319	6A	11.116
AX-89808429	6A	12.648
AX-89841891	6A	13.561
AX-89798354	6A	13.866
AX-89841886	6A	15.394
AX-89864570	6A	15.394
AX-89906477	6A	15.699
AX-89899932	6A	16.309
AX-89842694	6A	16.309
AX-89799868	6A	16.614
AX-89850331	6A	16.614
AX-89799178	6A	16.766
AX-89850330	6A	16.919
AX-89850329	6A	17.845
AX-89850326	6A	18.149
AX-89808602	6A	18.47
AX-89906537	6A	19.155
AX-89842537	6A	19.544
AX-89799692	6A	20.092
AX-89842460	6A	20.64
AX-89842396	6A	21.736
AX-89842364	6A	22.284
AX-89850298	6A	22.284
AX-89799541	6A	22.831
AX-89899520	6A	23.927
AX-89842225	6A	23.927
AX-89799464	6A	24.475
AX-89799457	6A	24.475
AX-89799243	6A	27.221
AX-89900009	6A	27.359
AX-89864573	6A	27.525
AX-89906494	6A	27.868
AX-89850271	6A	28.558
AX-89899431	6A	28.901
AX-89906503	6A	29.244
AX-89900141	6A	31.484
AX-89906555	6A	31.484
AX-89842955	6A	32.109
AX-89842939	6A	32.109
AX-89905954	6A	34.405
AX-89850374	6A	35.935
AX-89843030	6A	35.935
AX-89795687	6A	38.499
AX-89906091	6A	38.499
AX-89795678	6A	38.499
AX-89838461	6A	38.499
AX-89795729	6A	39.006
AX-89837824	6A	39.006
AX-89914405	6A	39.006
AX-89805240	6A	39.465
AX-89837517	6A	40.534
AX-89795523	6A	40.534
AX-89837553	6A	40.534
AX-89837857	6A	41.452
AX-89795751	6A	42.212
AX-89861948	6A	42.676
AX-89796115	6A	43.596
AX-89864254	6A	56.532
AX-89795922	6A	57.452
[truncated: 609 more rows]
